# Supplementary material for: A high‐throughput method to identify trans‐activation domains within transcription factor sequences
Source: PubMed Central journal article supplement (PMC6092621; doi:10.15252/embj.201798896), 2018-07-13

# Appendix for

## A high-throughput method to identify trans-activation domains within transcription factor sequences

Cosmas D. Arnold\*, Filip Nemčko\*, Ashley R. Woodfin\*, Sebastian Wienerroither\*, Anna Vlasova\*, Alexander Schleiffer, Michaela Pagani, Martina Rath, Alexander Stark

\* shared first authors

### Table of contents:

Appendix Figures S1-S4

|                                                                                                                                                                                                                          |     |
|--------------------------------------------------------------------------------------------------------------------------------------------------------------------------------------------------------------------------|-----|
| <b>Appendix Figure S1.</b> Short-fragment library native (+1) reading-frame tADs<br>UCSC genome browser screenshots for 53 tADs (see Table EV2 for details).<br>One tAD per page – order as in Table EV2. ....           | 2   |
| <b>Appendix Figure S2.</b> Short-fragment library non-native frame tADs<br>UCSC genome browser screenshots for 103 tADs (see Table EV4 for details). One tAD per page.<br>One tAD per page – order as in Table EV4. .... | 56  |
| <b>Appendix Figure S3.</b> Long-fragment library native (+1) reading-frame tADs<br>UCSC genome browser screenshots for 18 tADs (see Table EV5 for details).<br>One tAD per page – order as in Table EV5. ....            | 160 |
| <b>Appendix Figure S4.</b> Long-fragment library non-native frame tADs<br>UCSC genome browser screenshots for 13 tADs (see Table EV6 for details). One tAD per page.<br>One tAD per page – order as in Table EV6. ....   | 179 |

## **Appendix Figure S1**

53 short-fragment library native (+1) reading-frame tADs

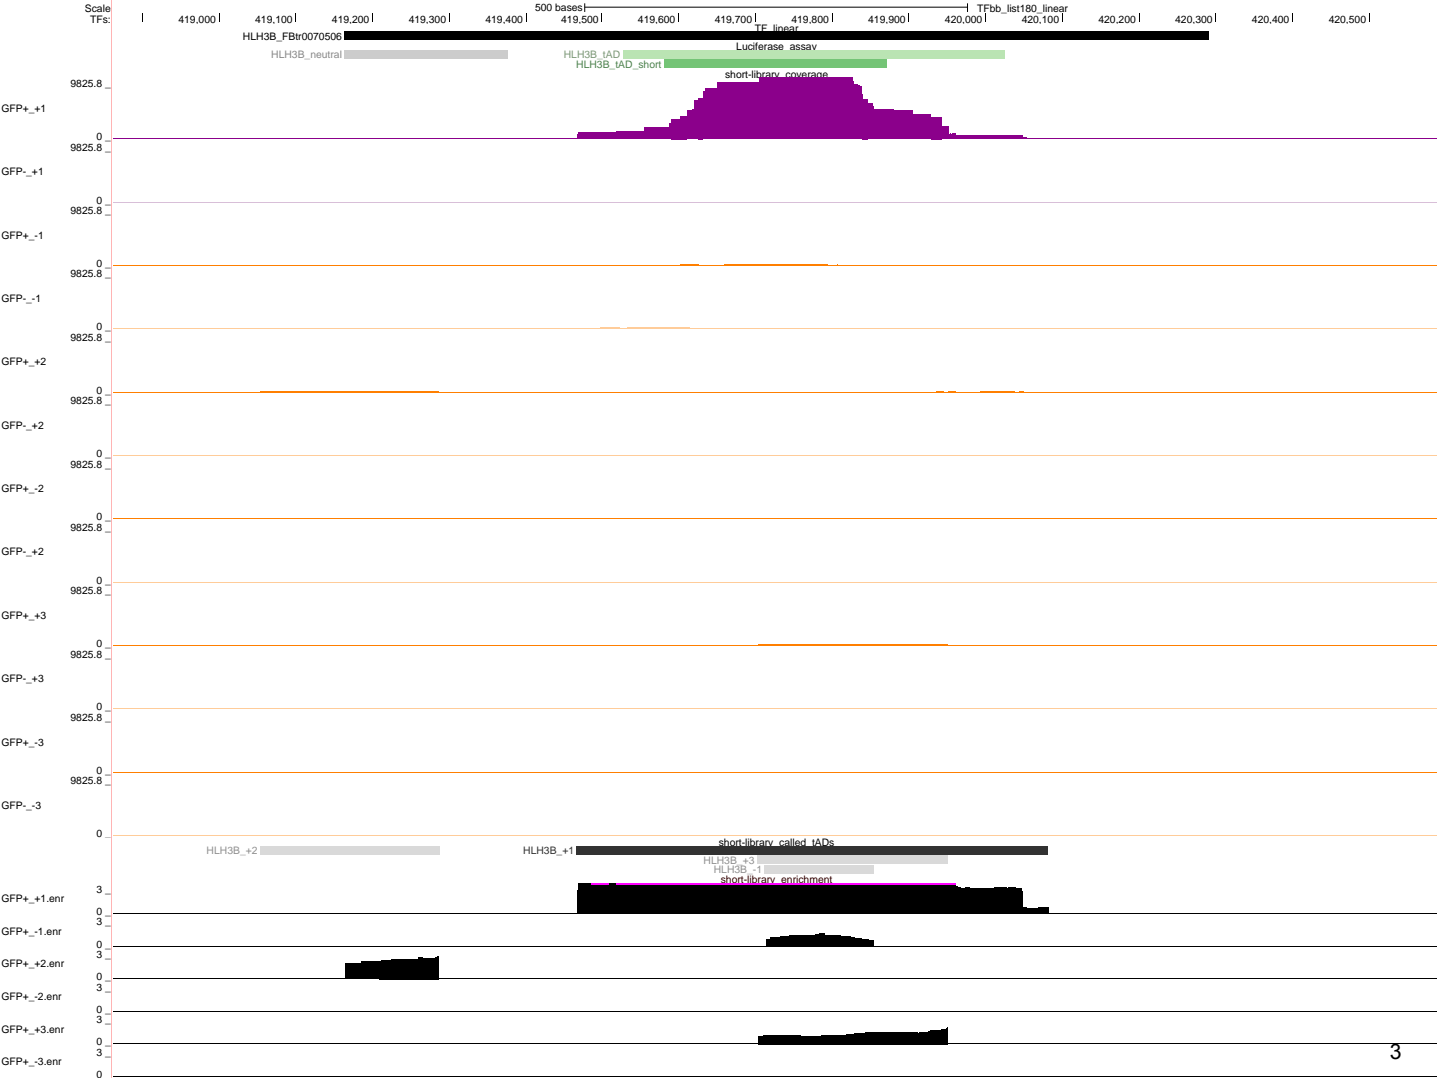

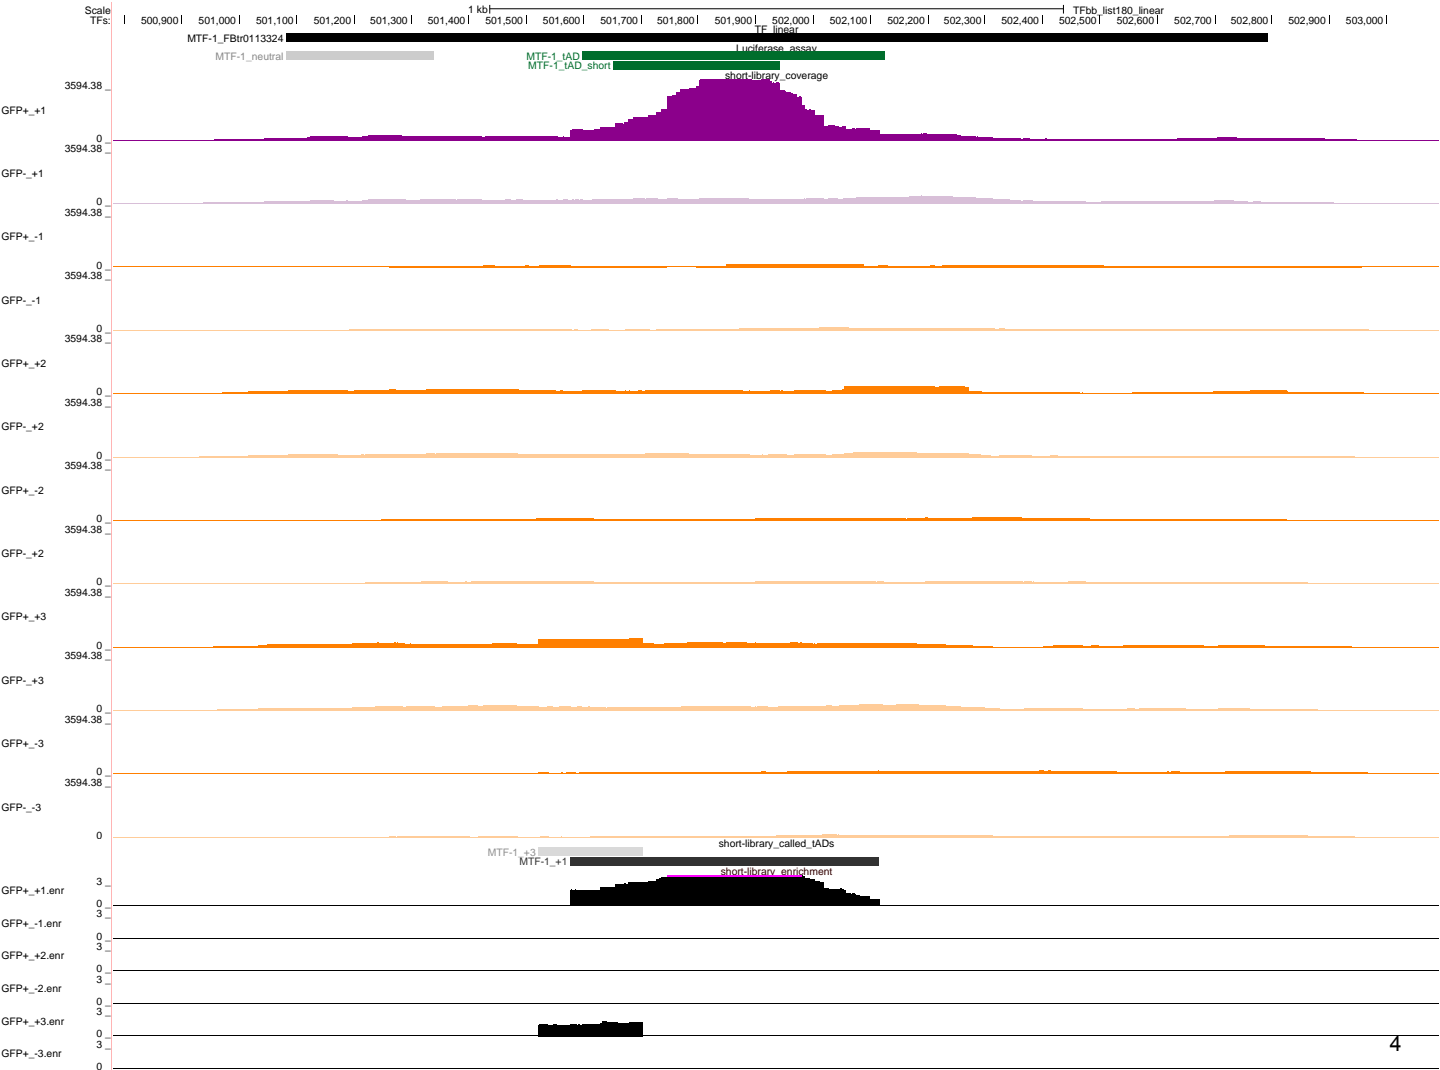



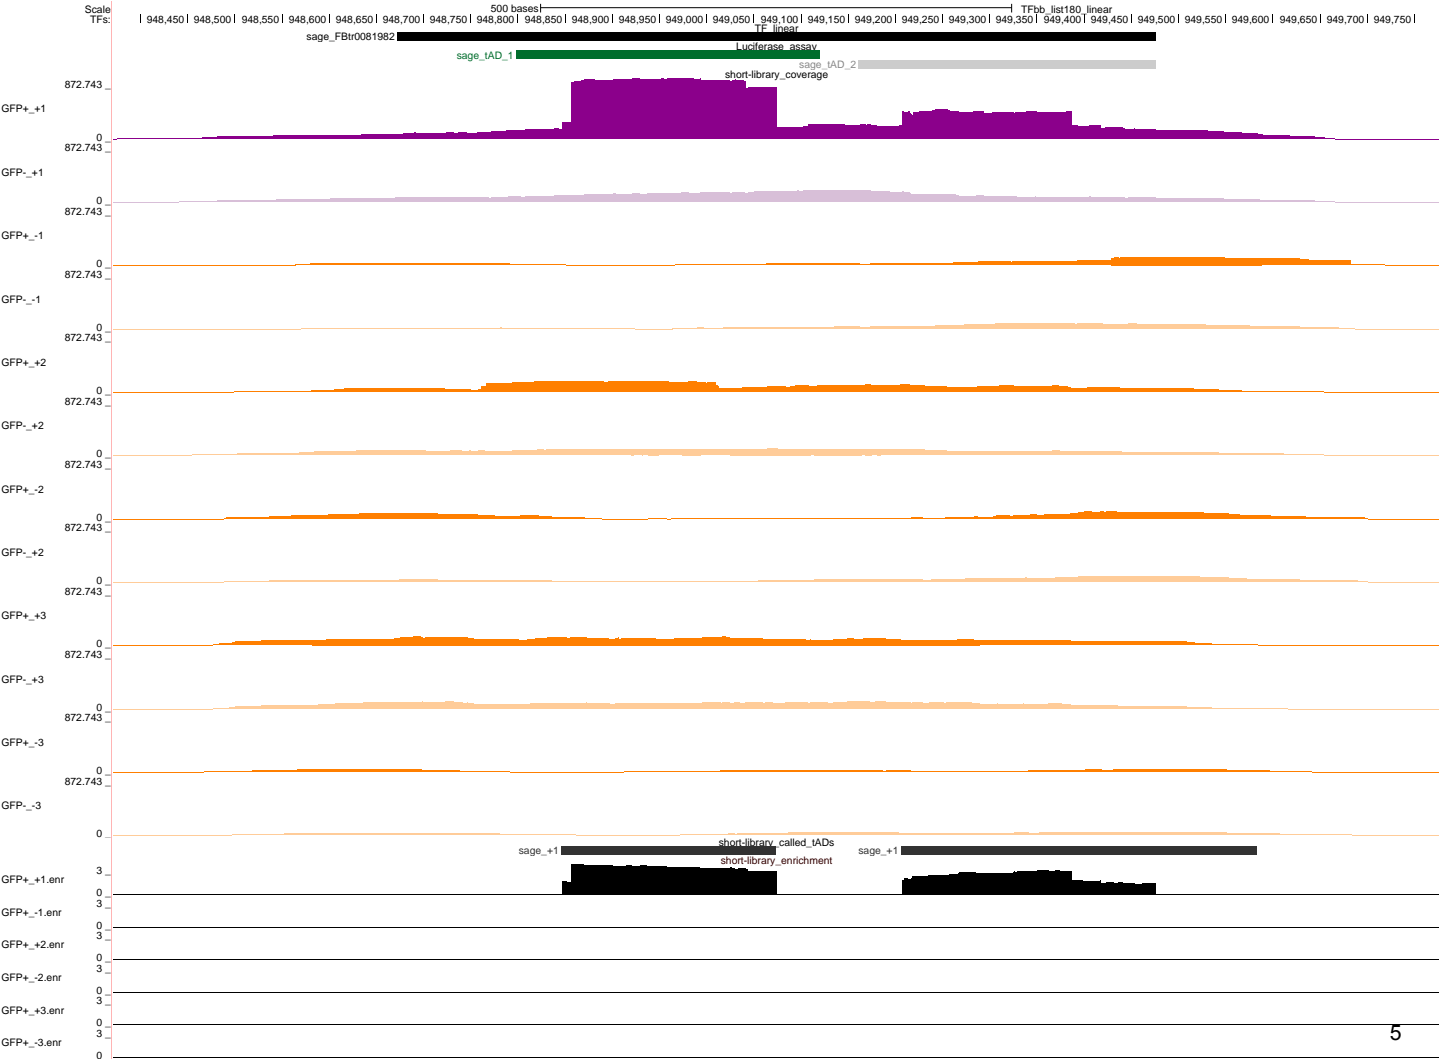



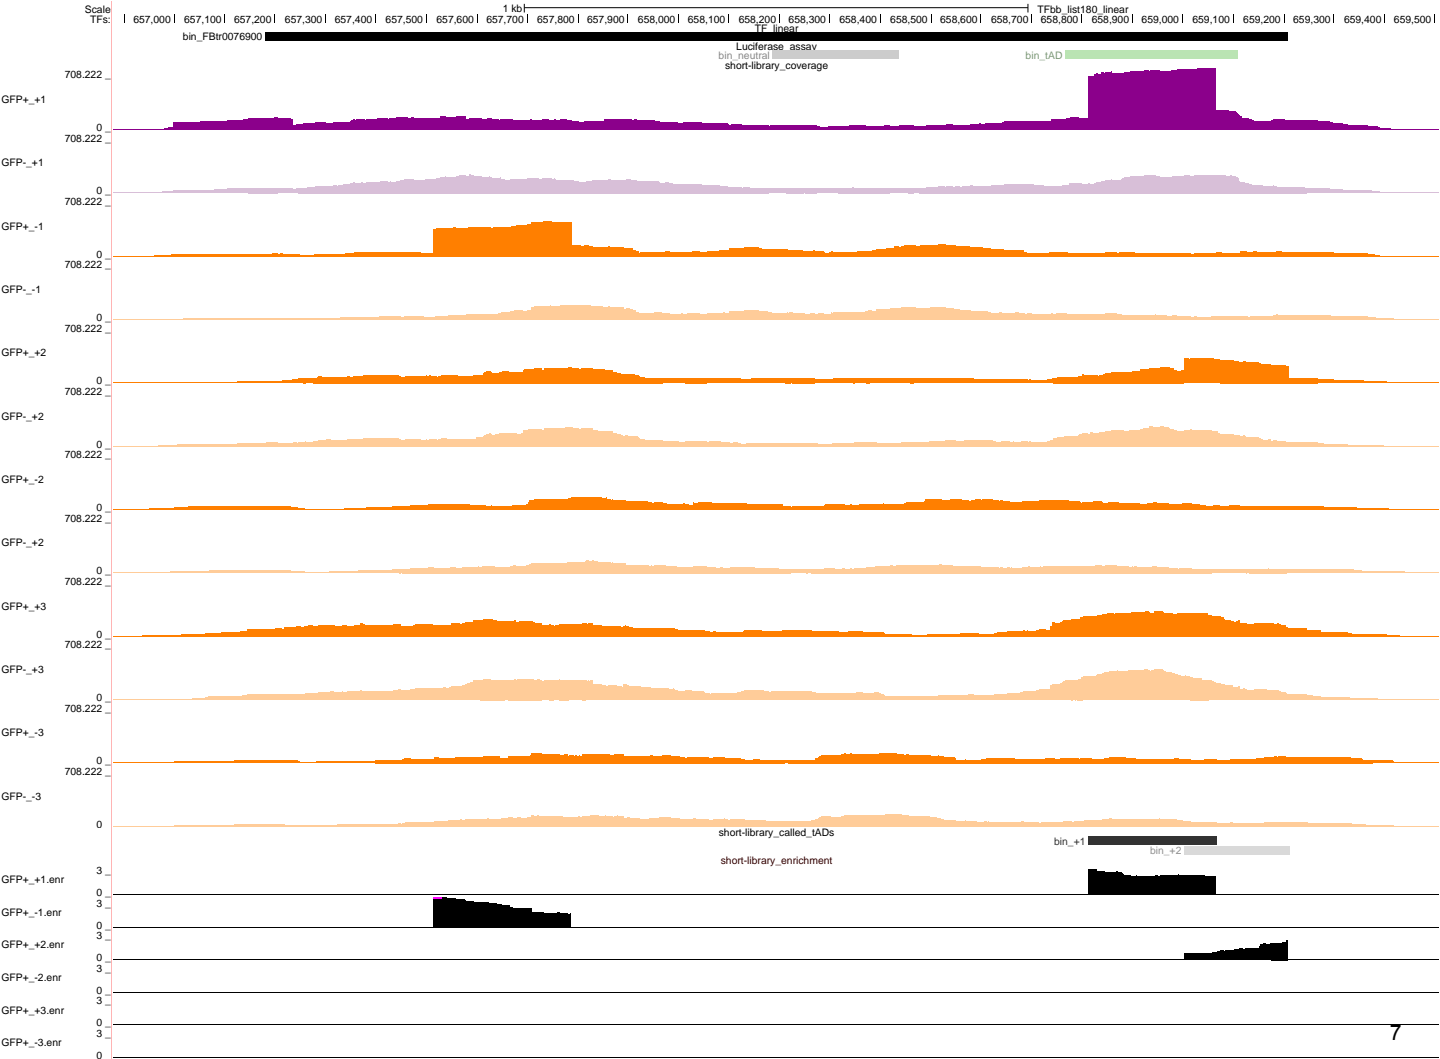

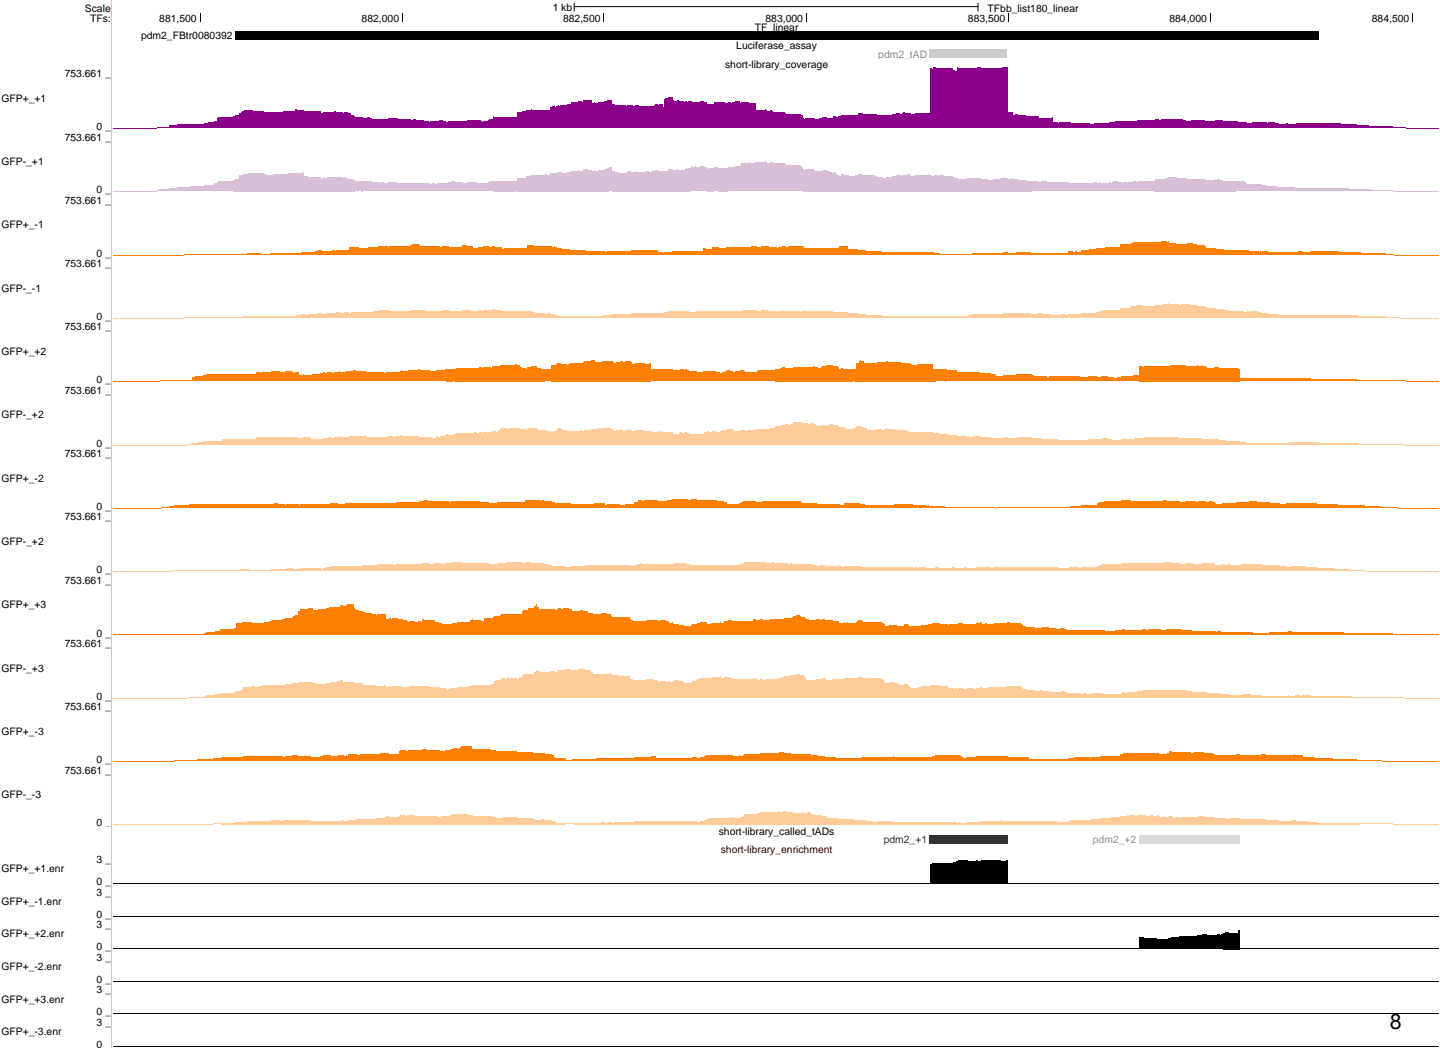



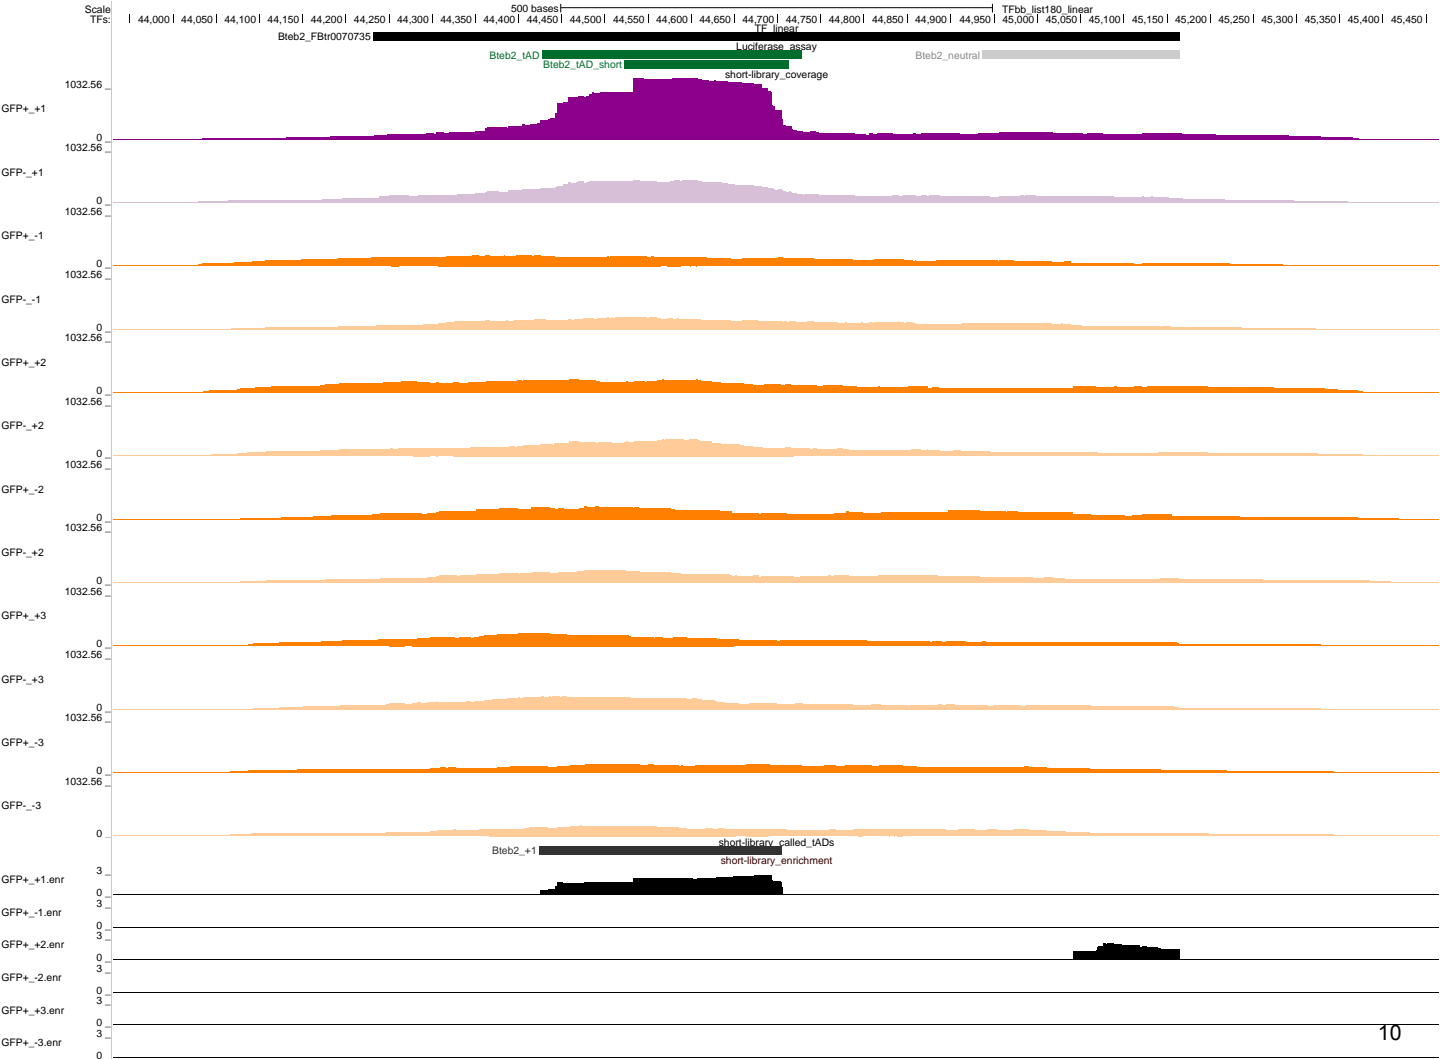



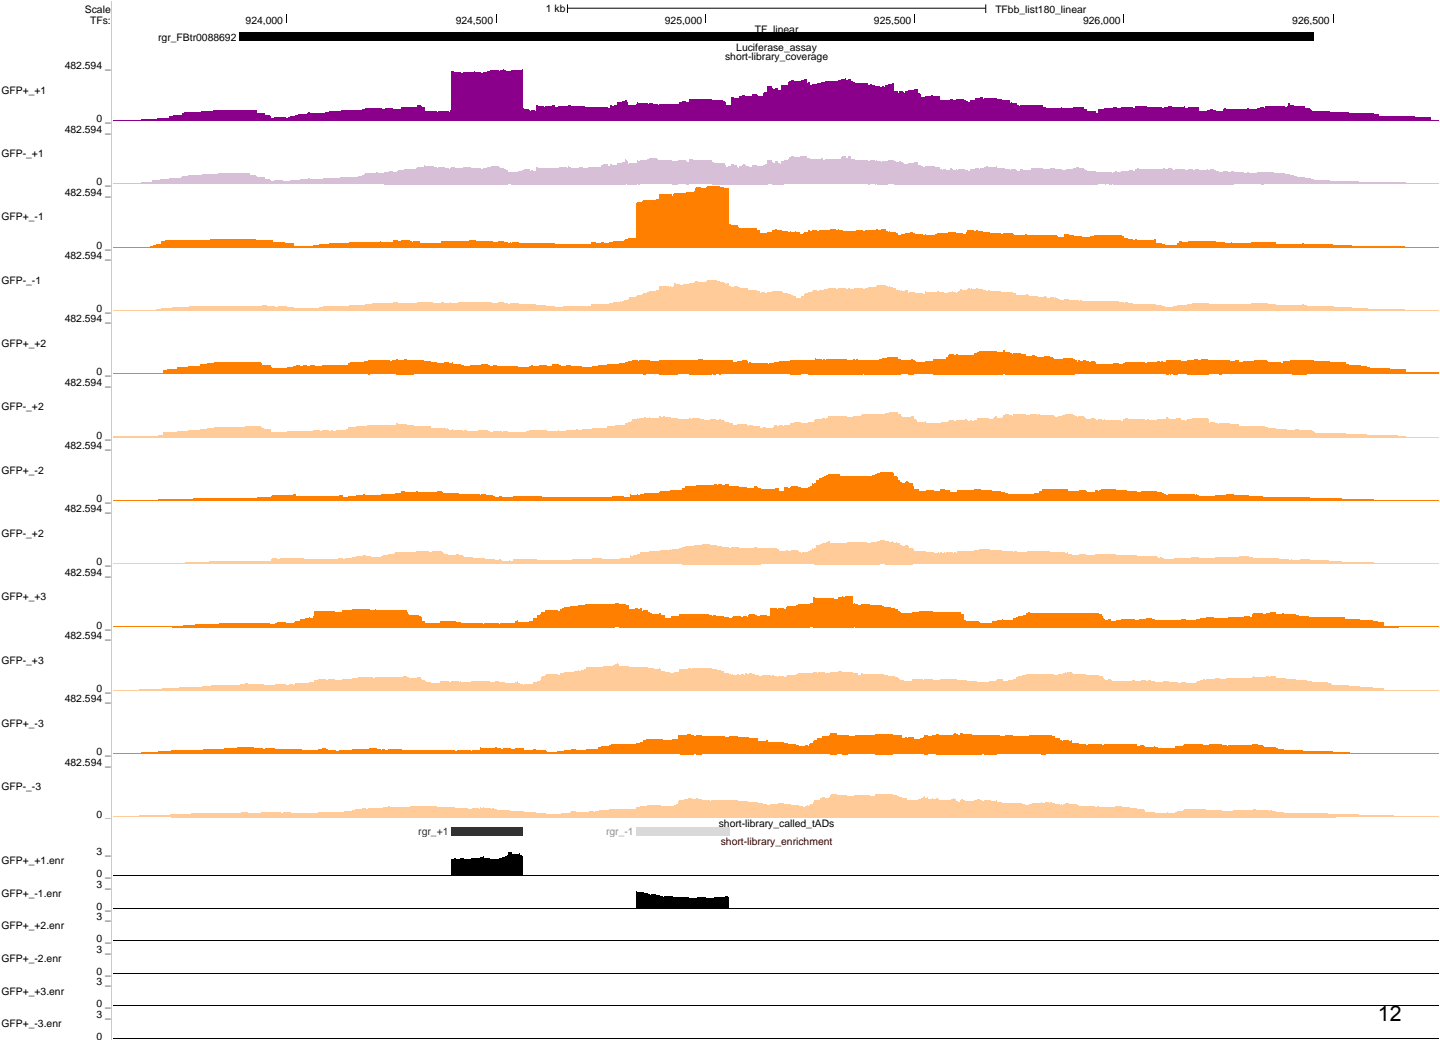





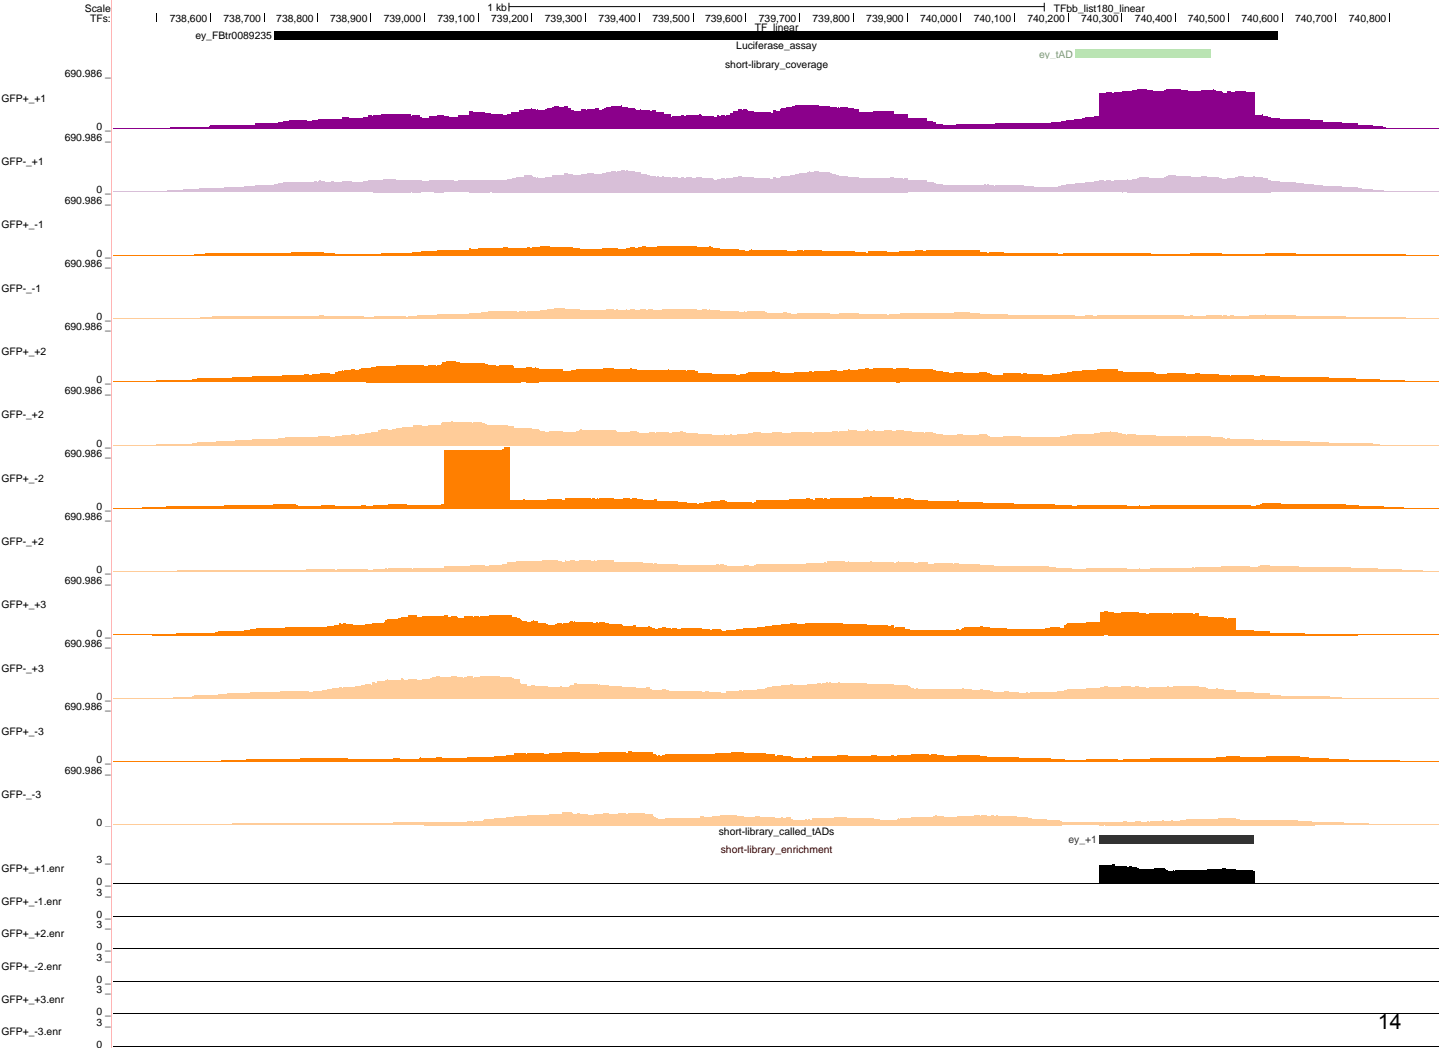





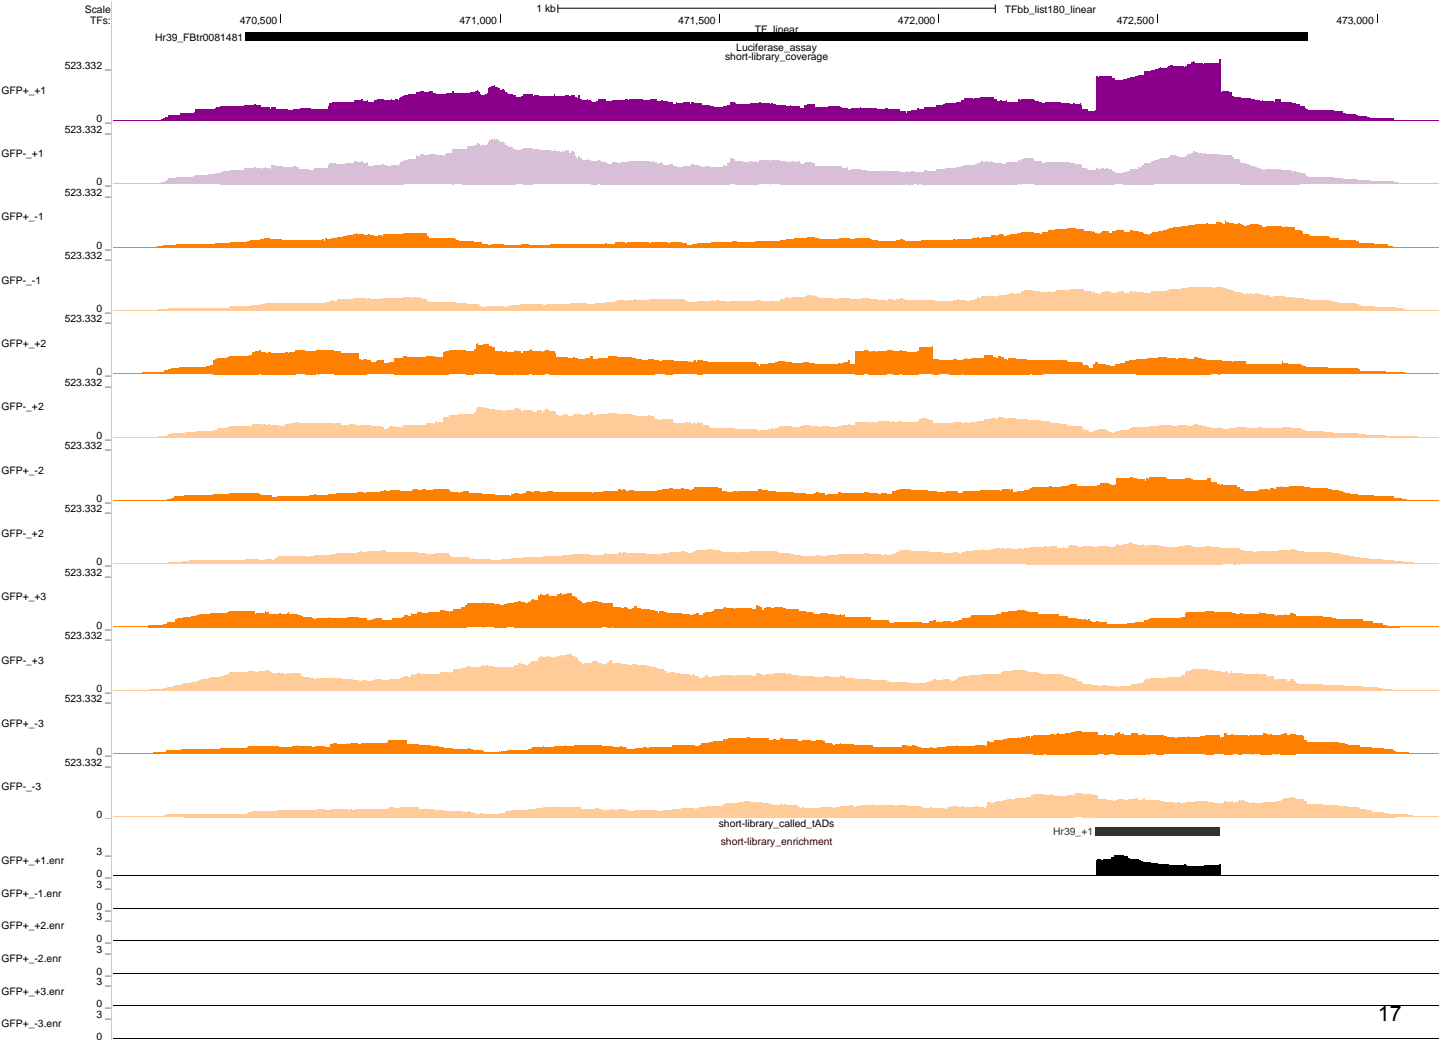





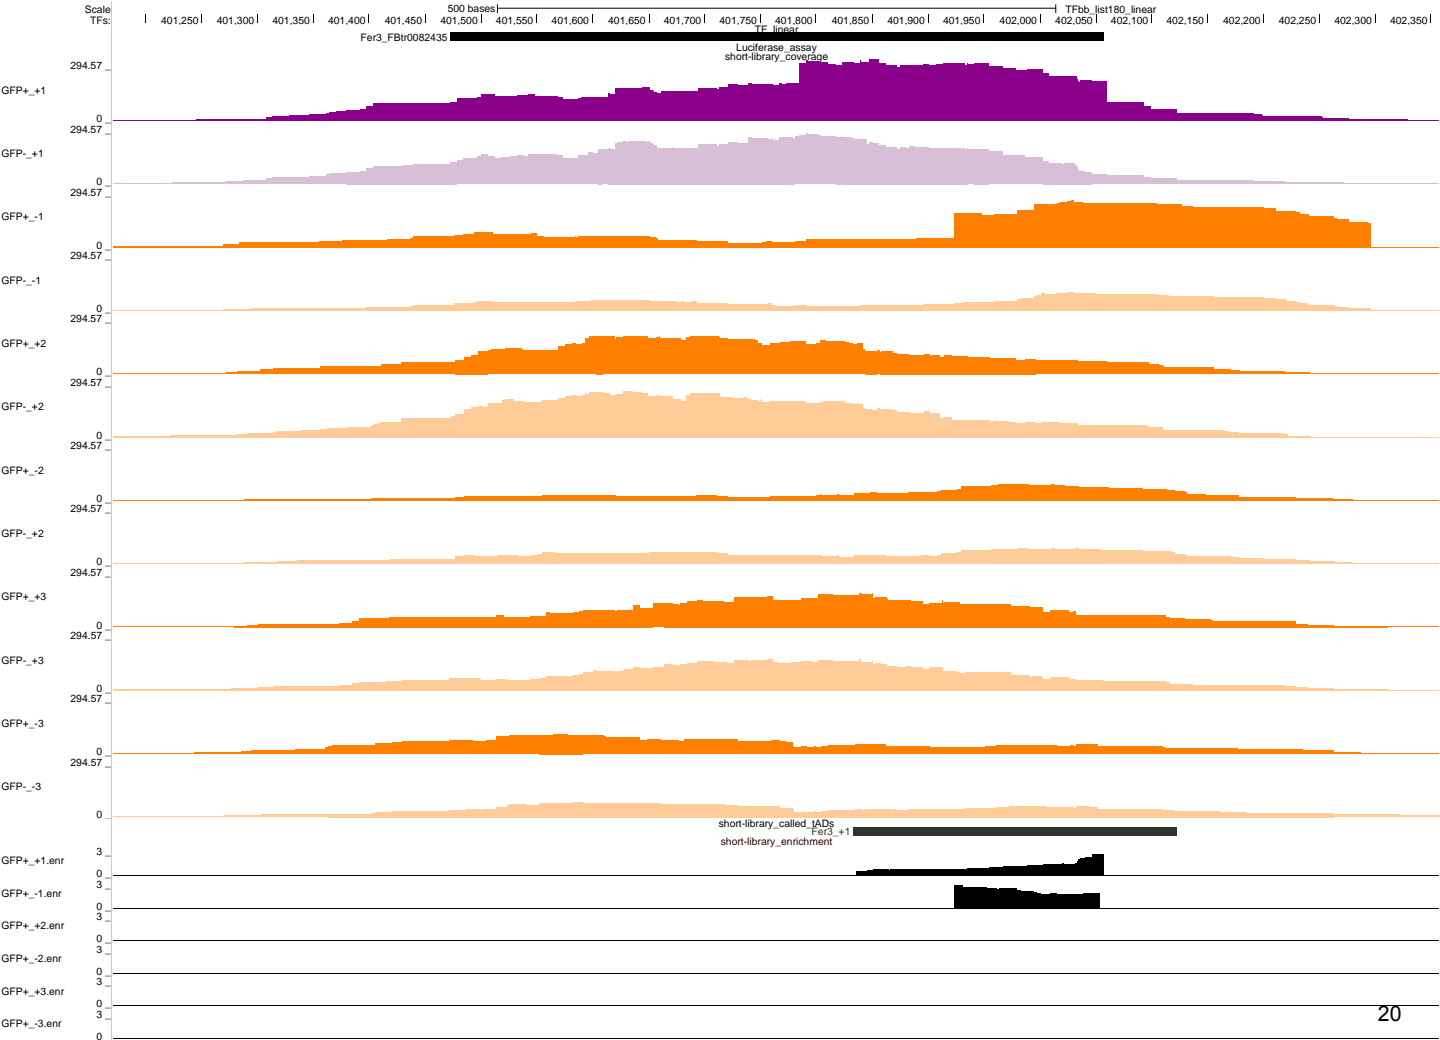















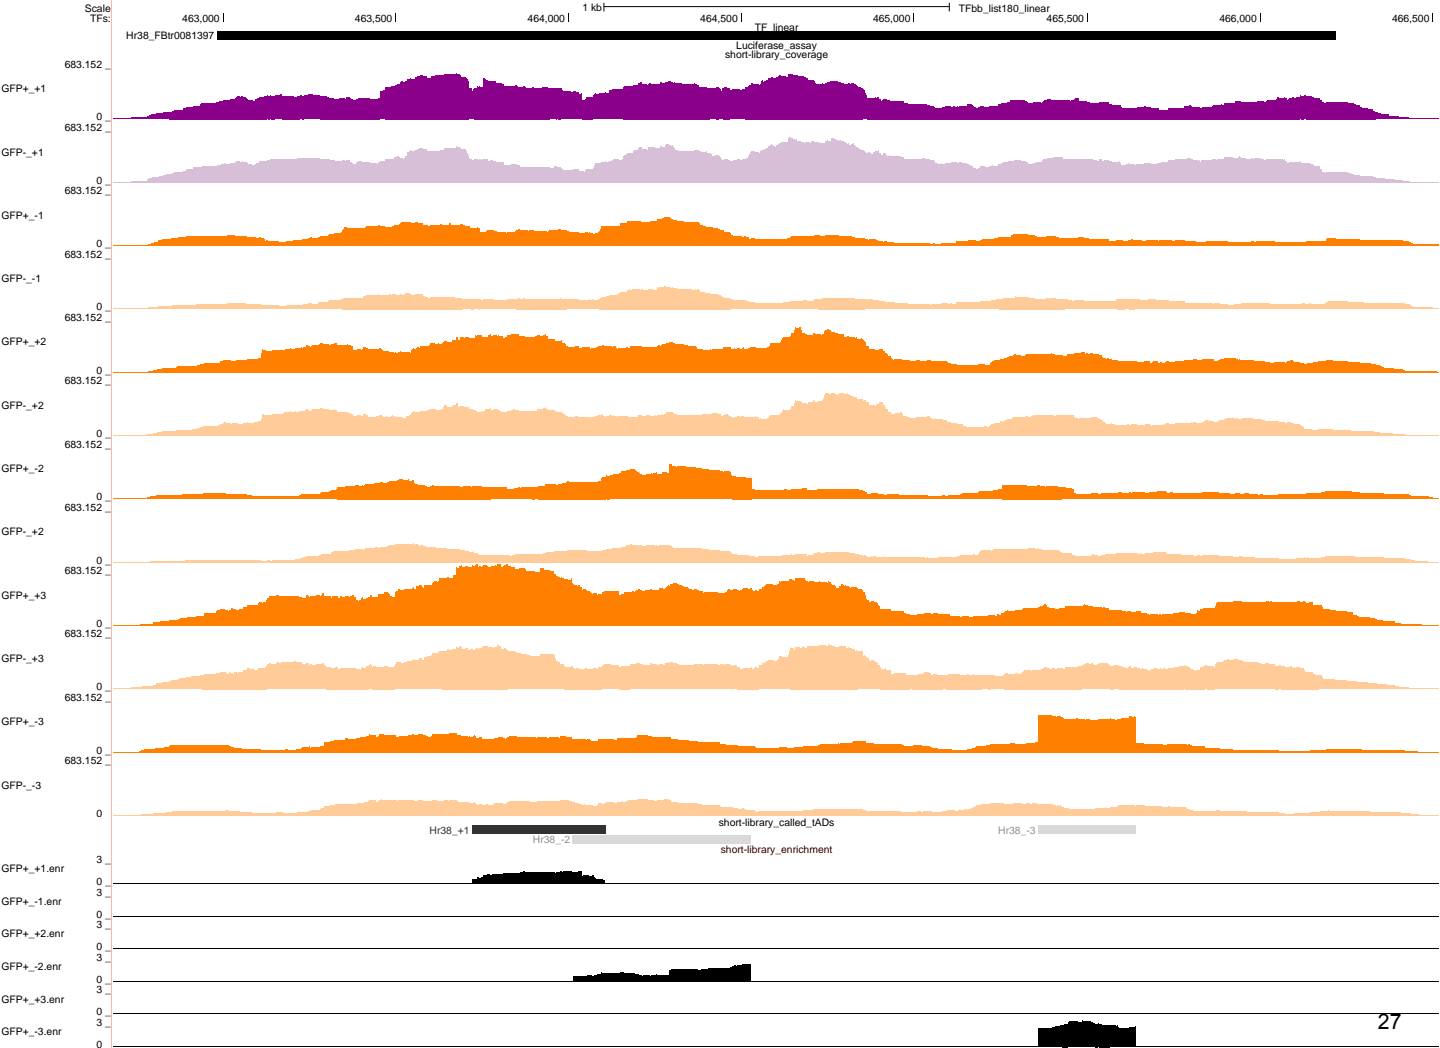

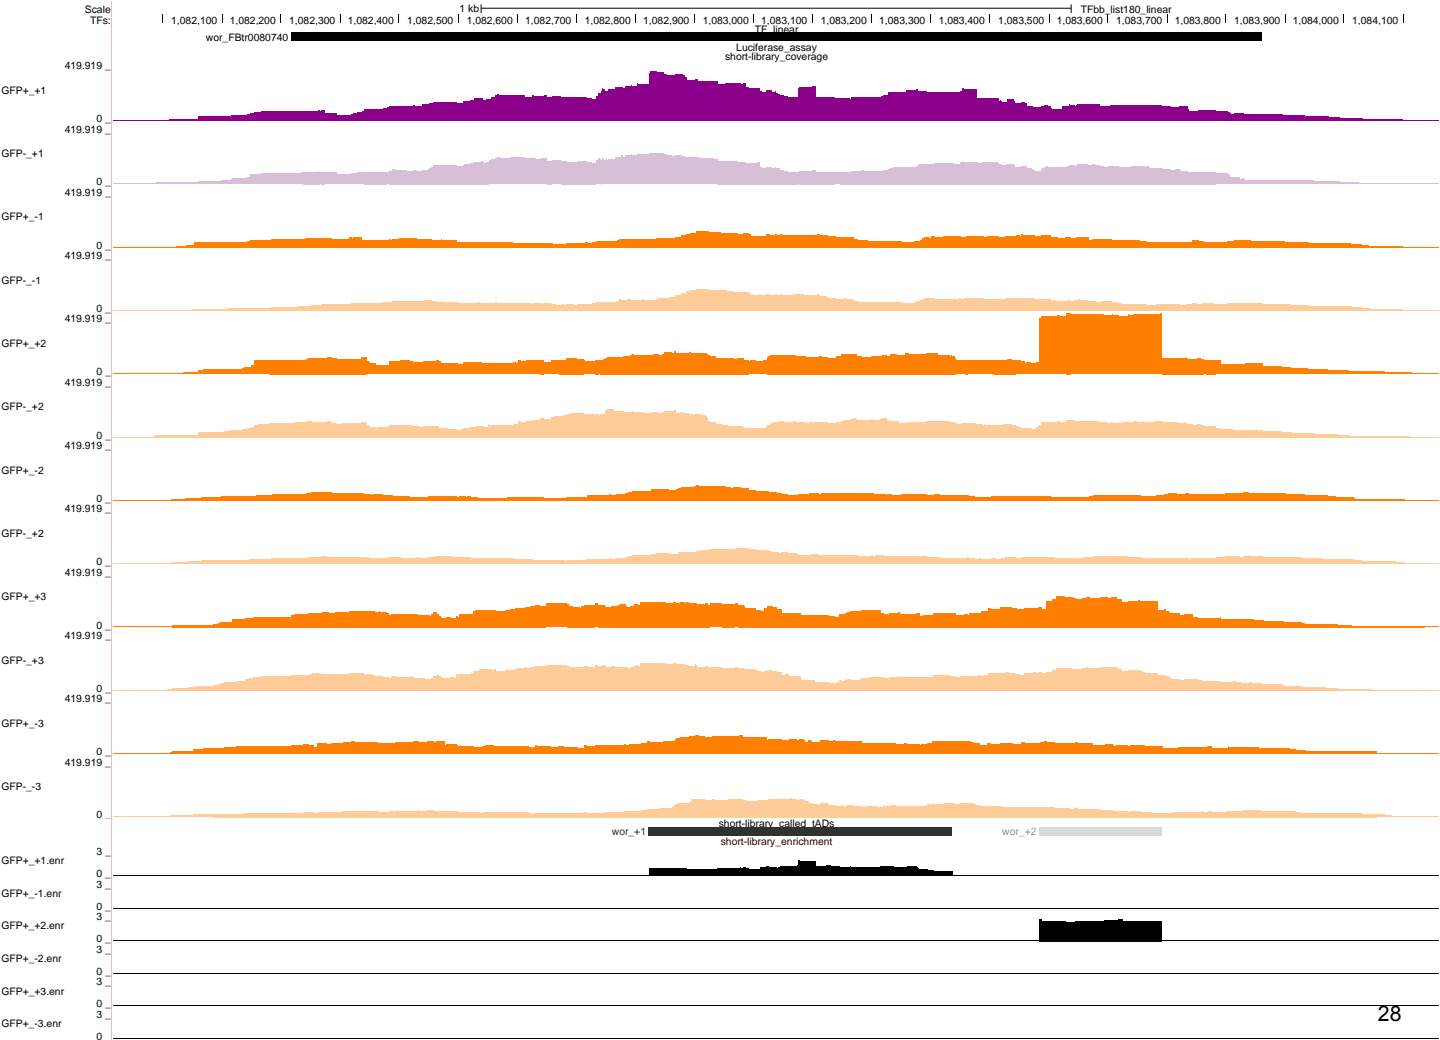





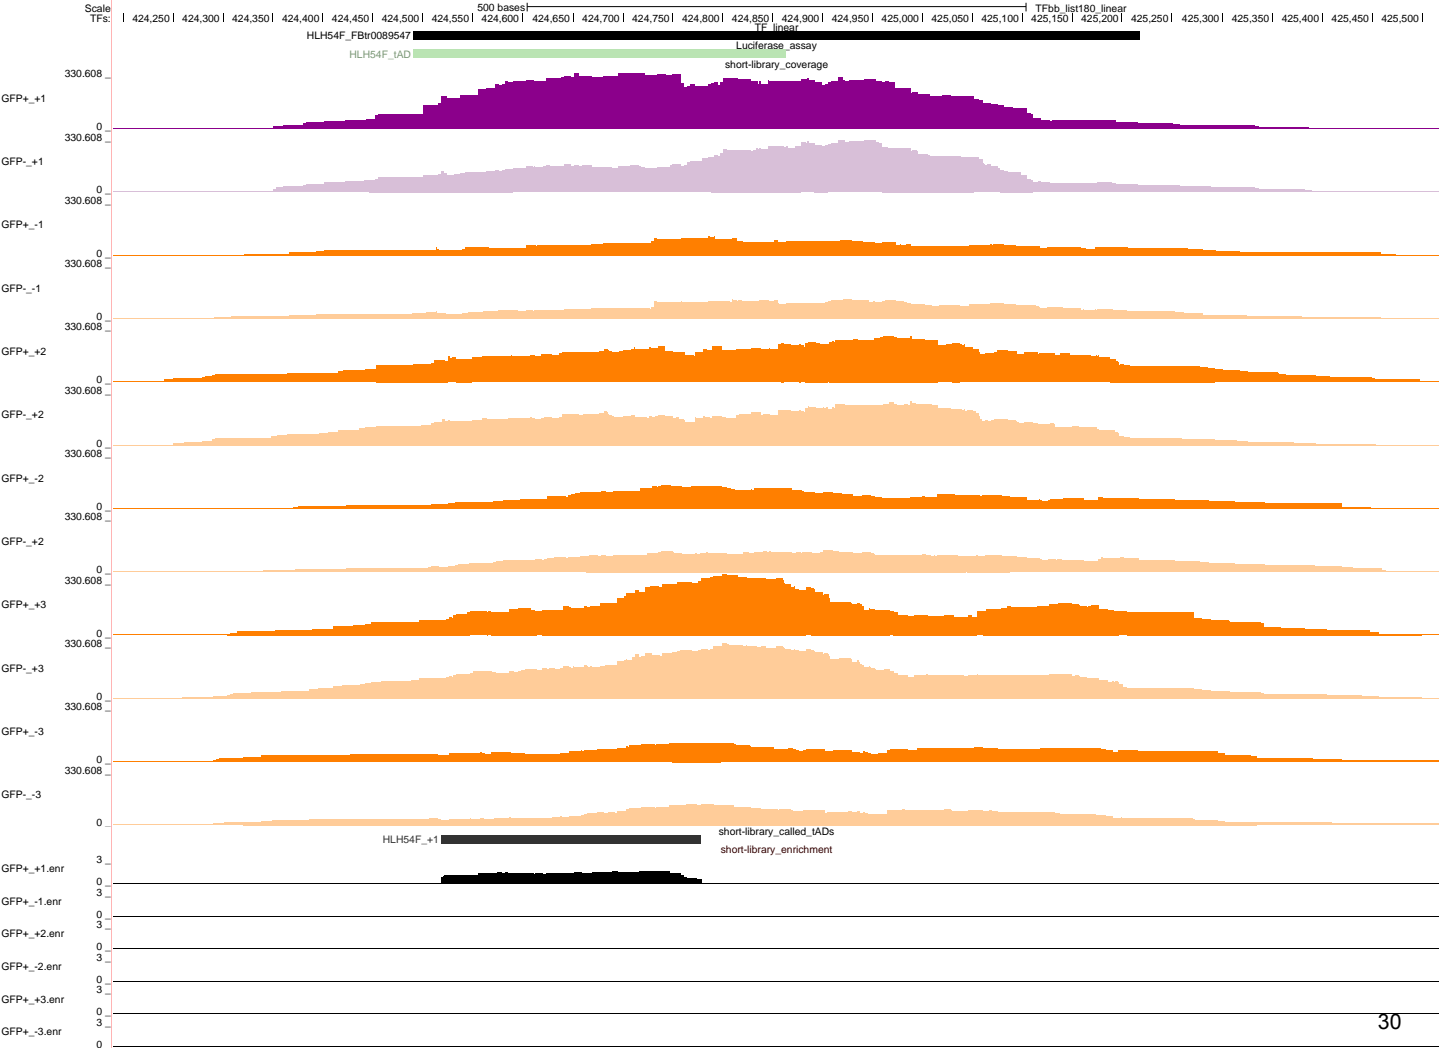

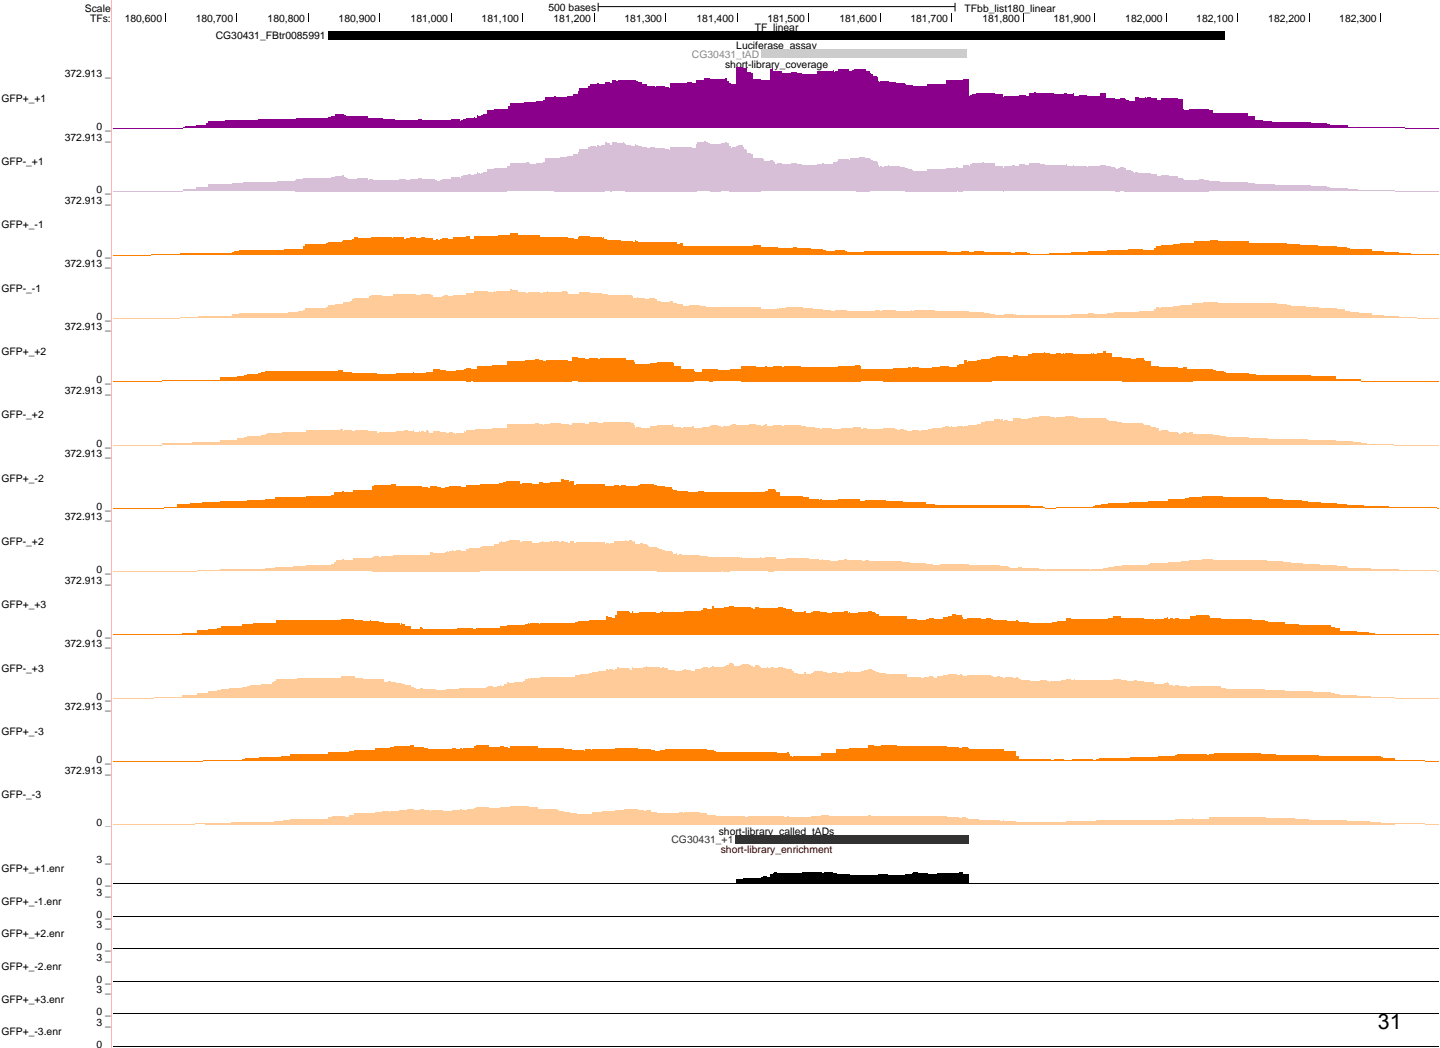





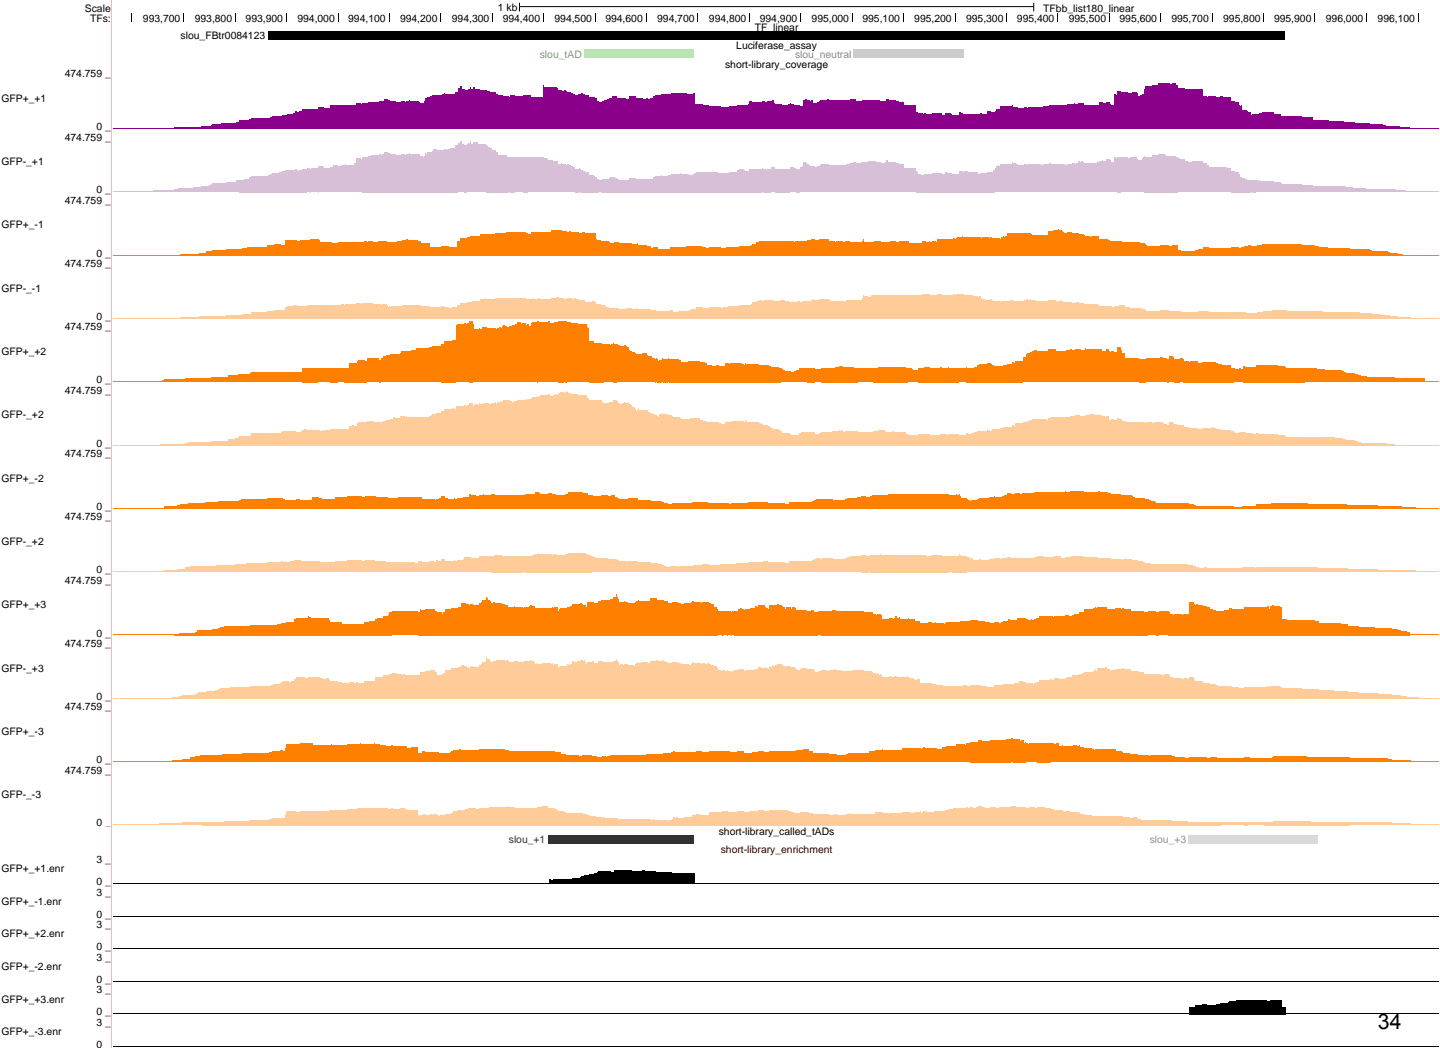

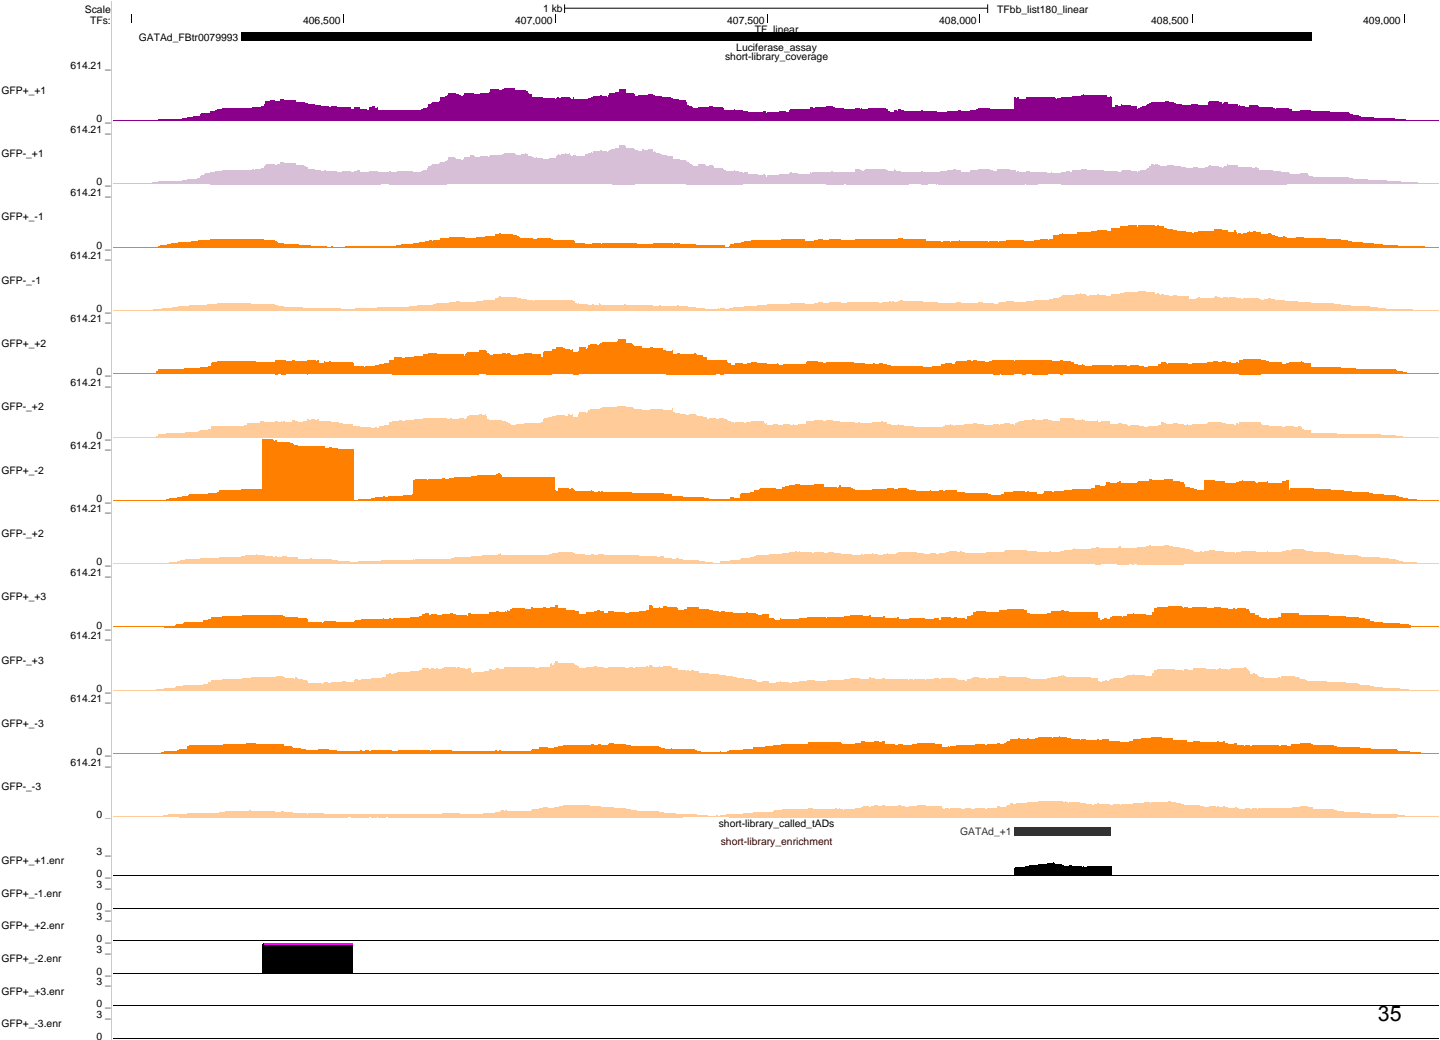

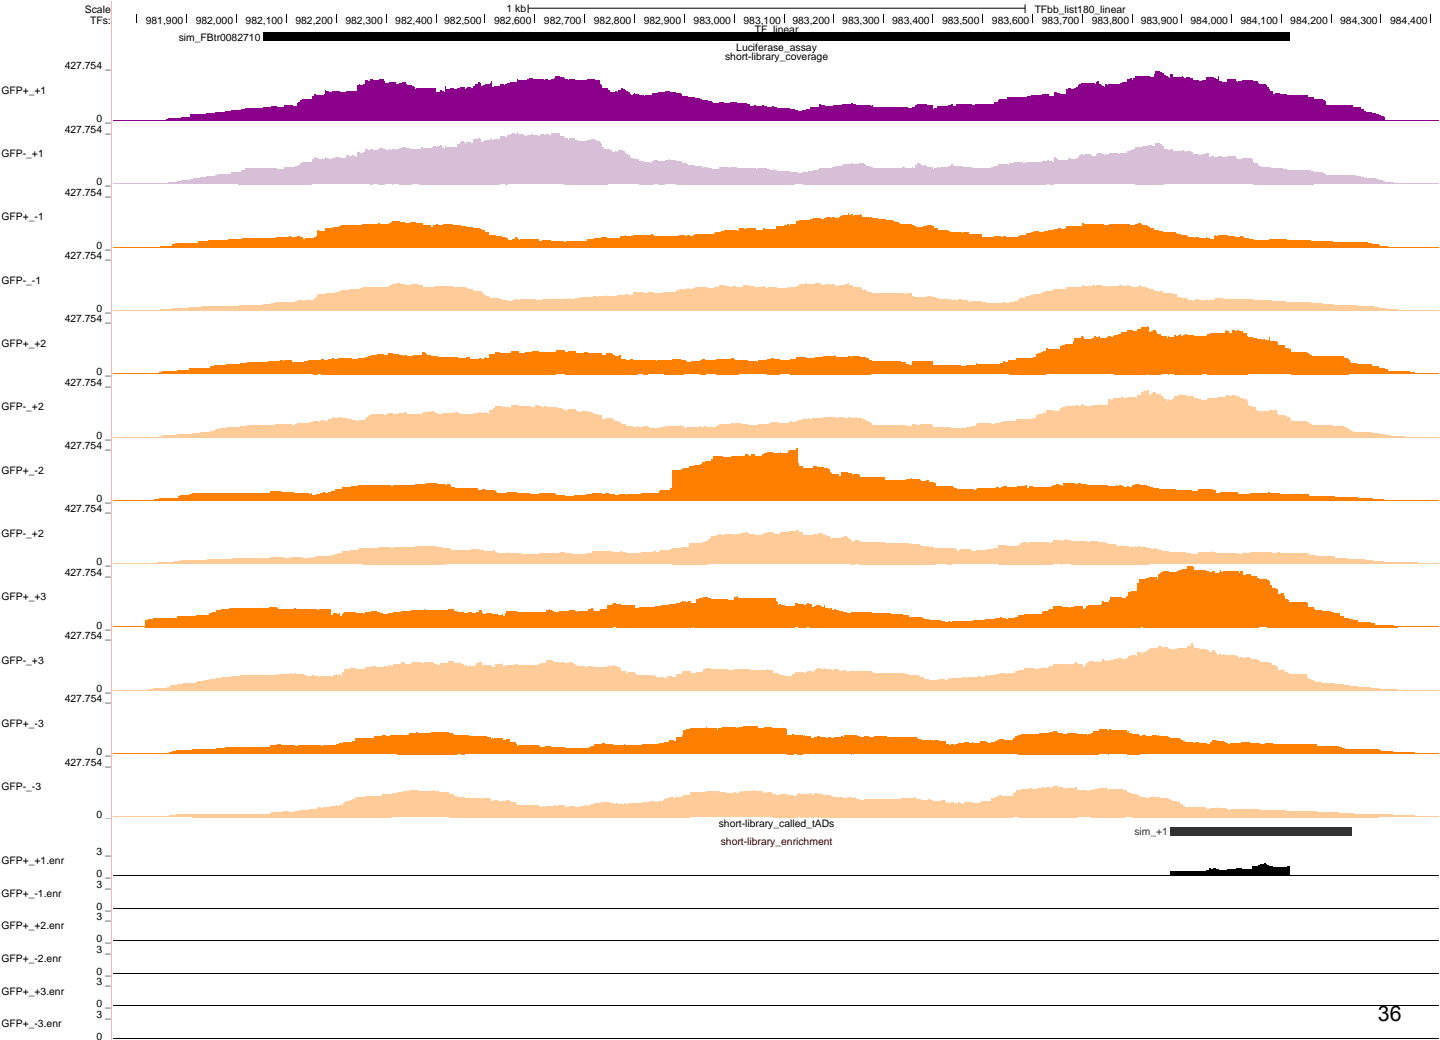



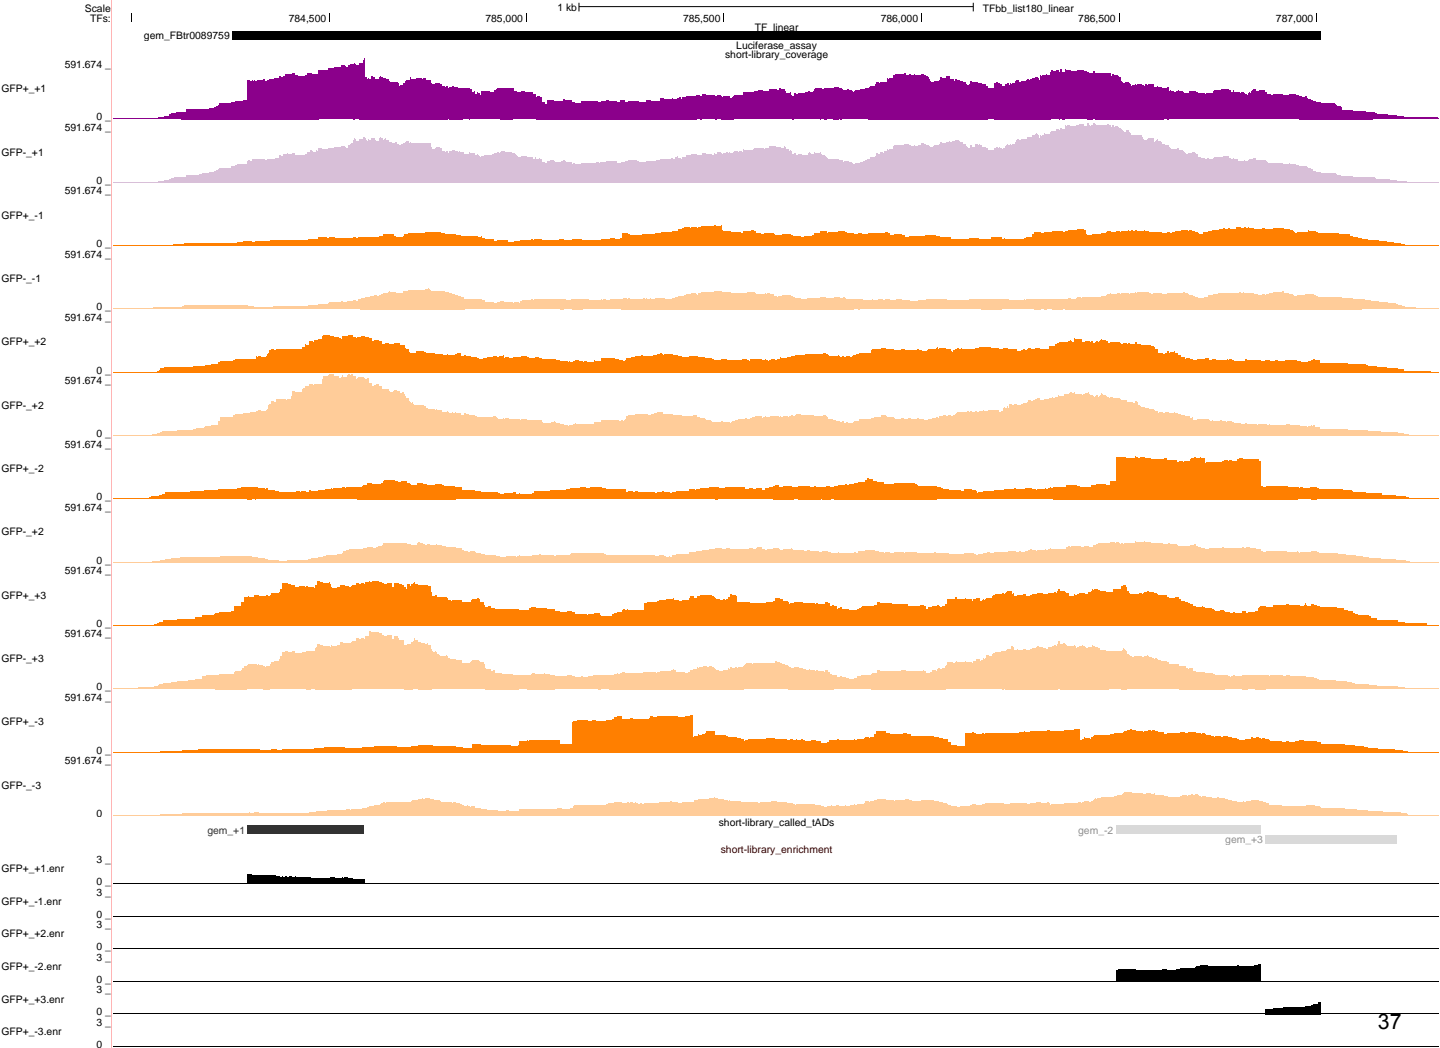

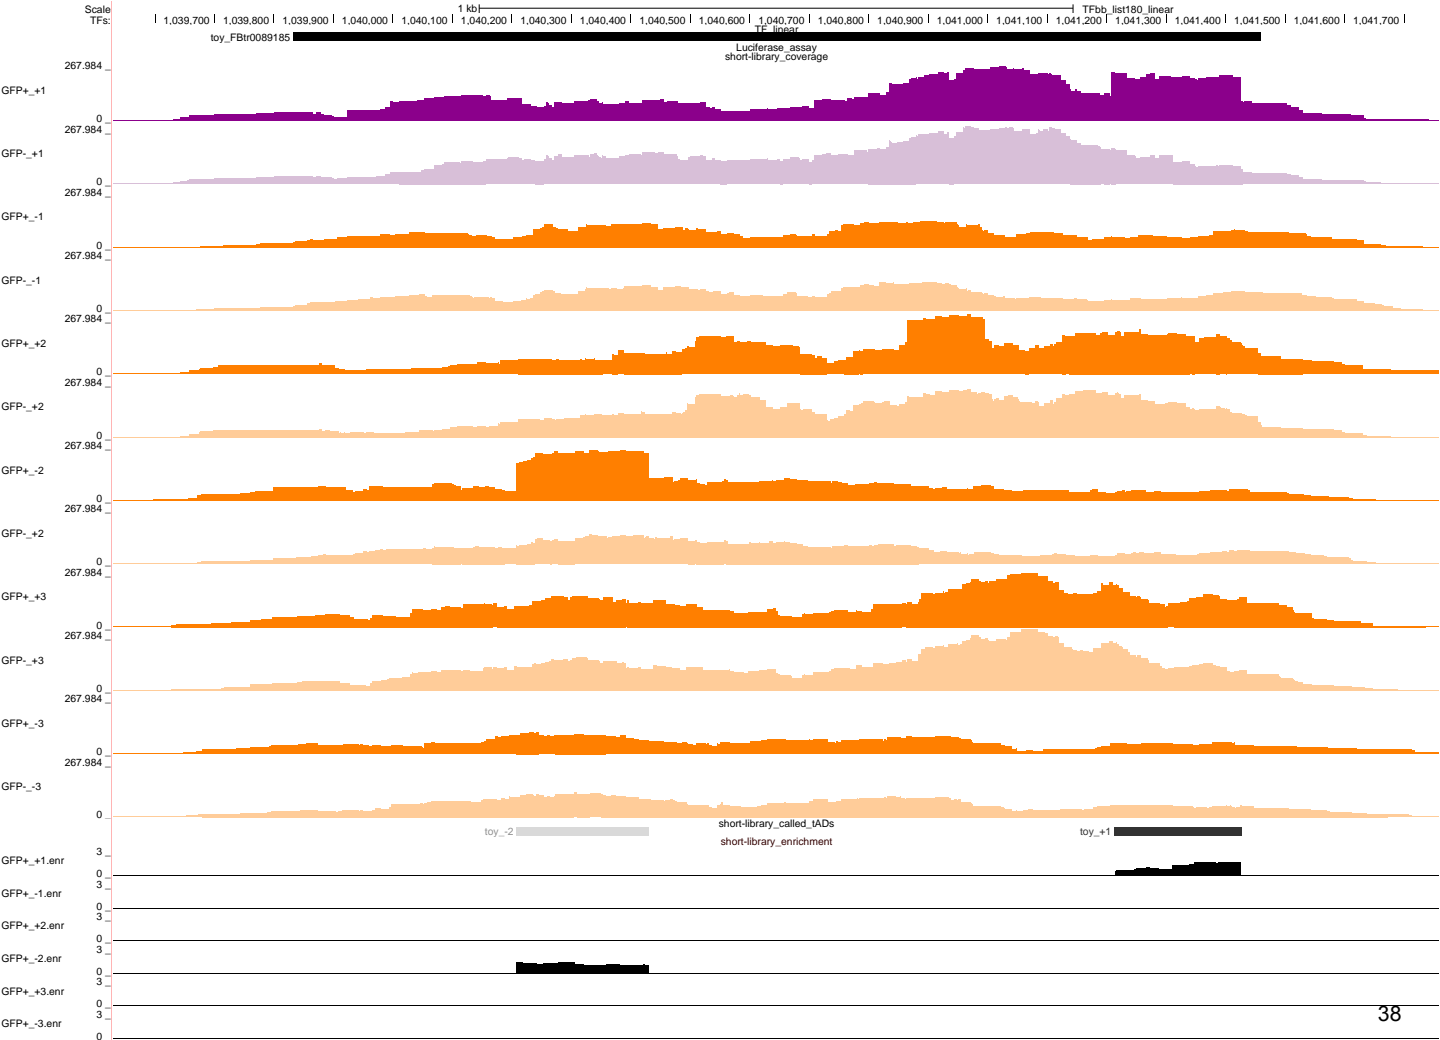

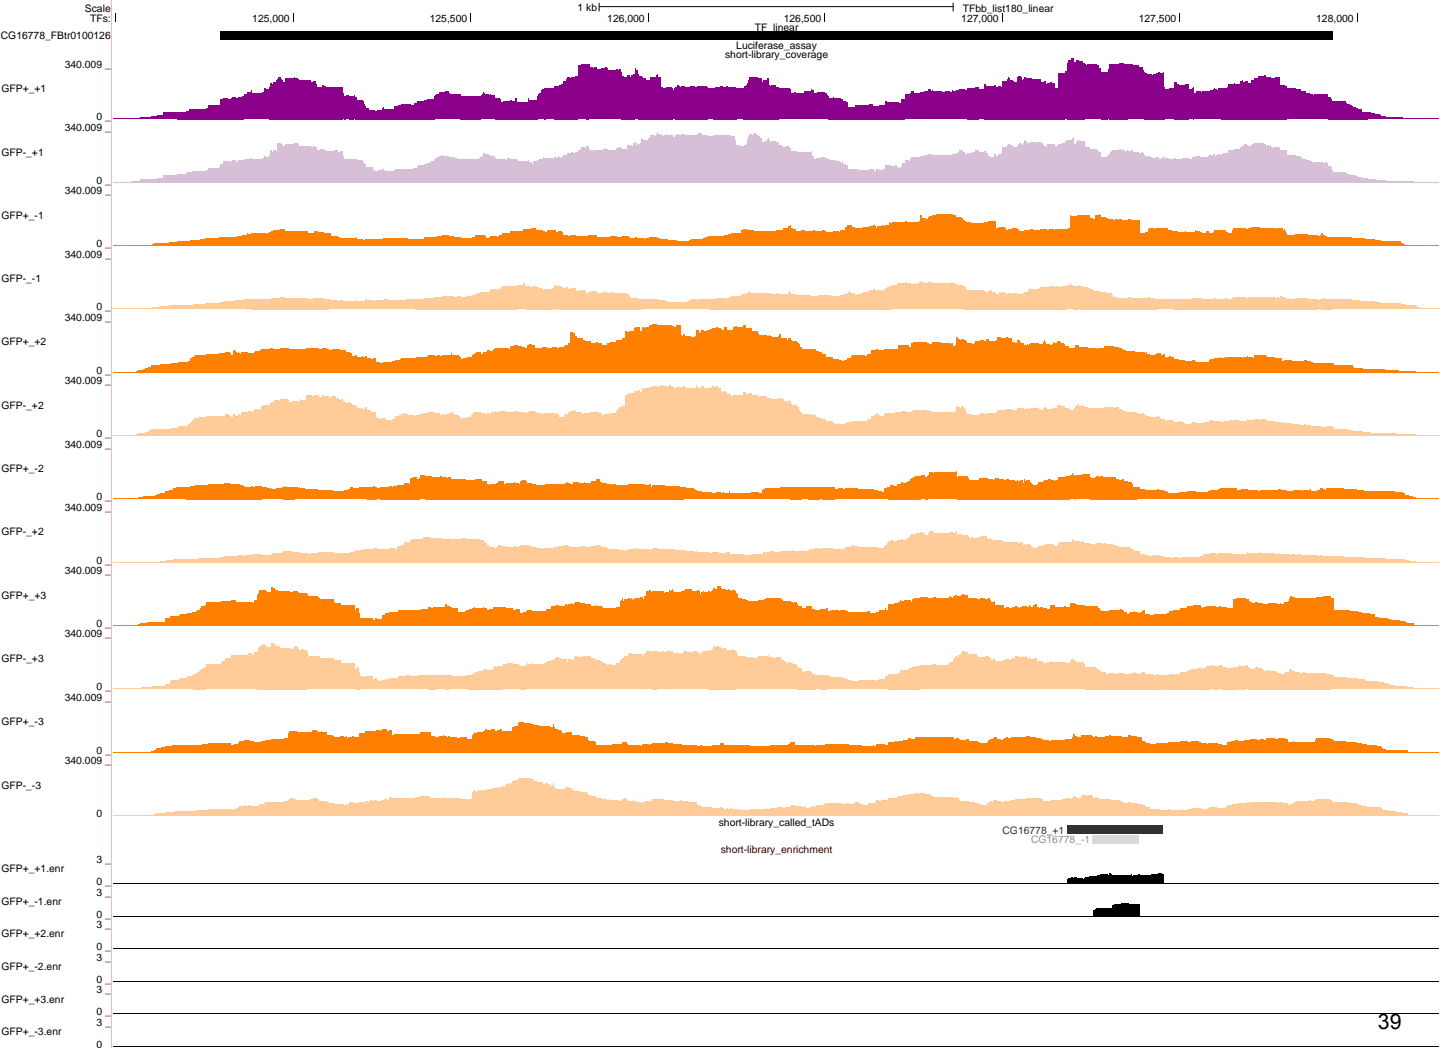

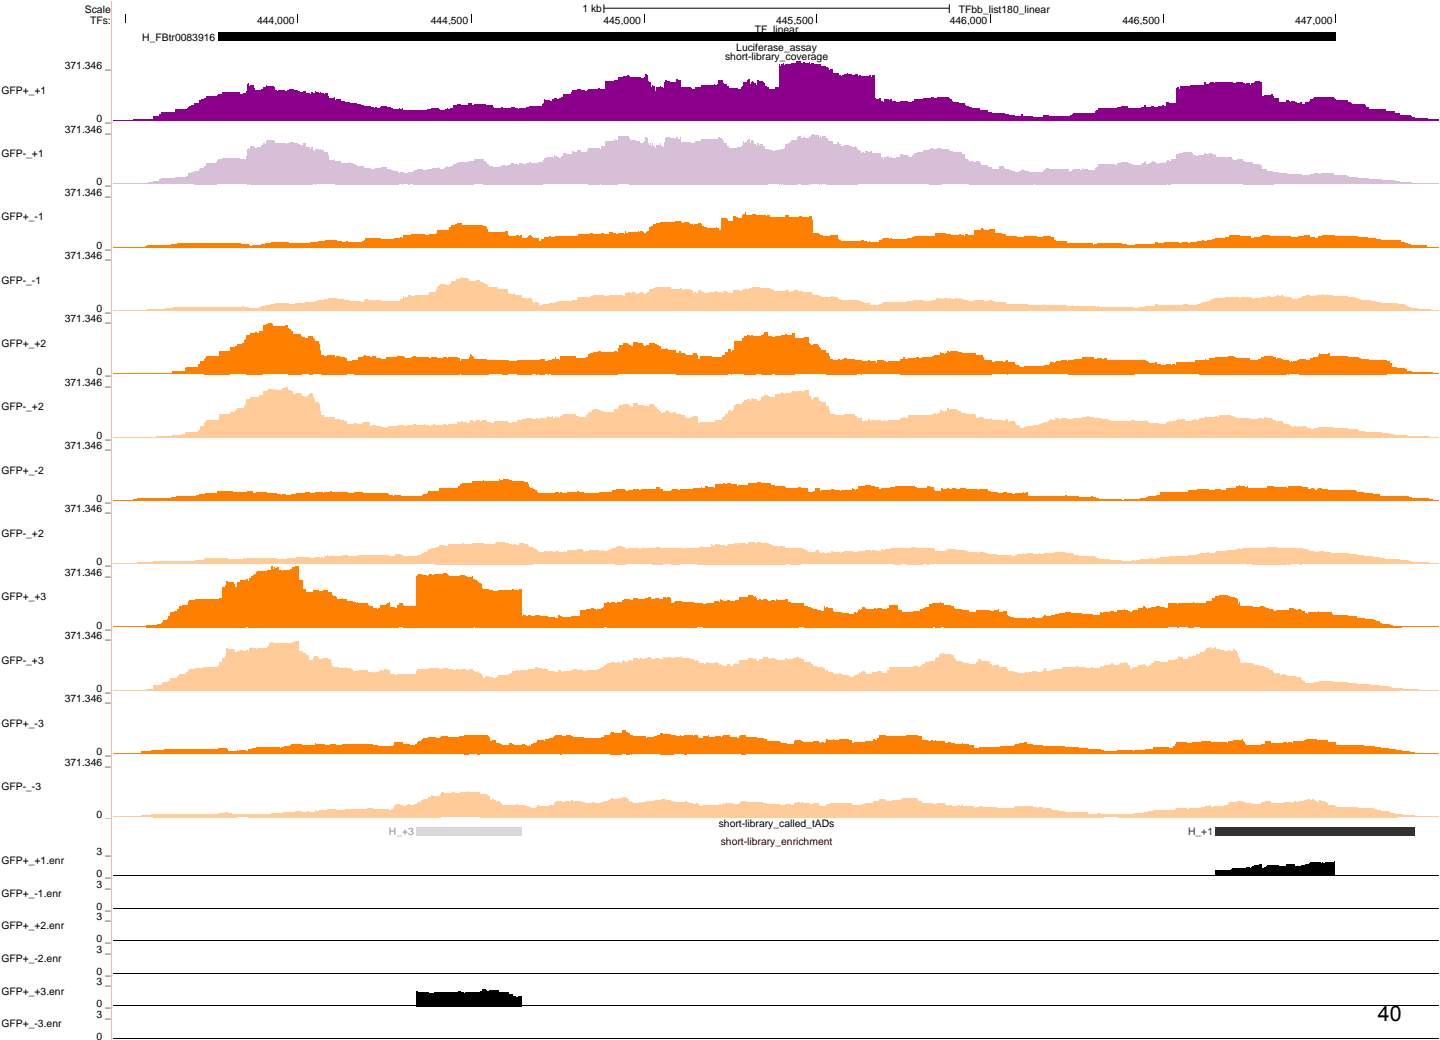

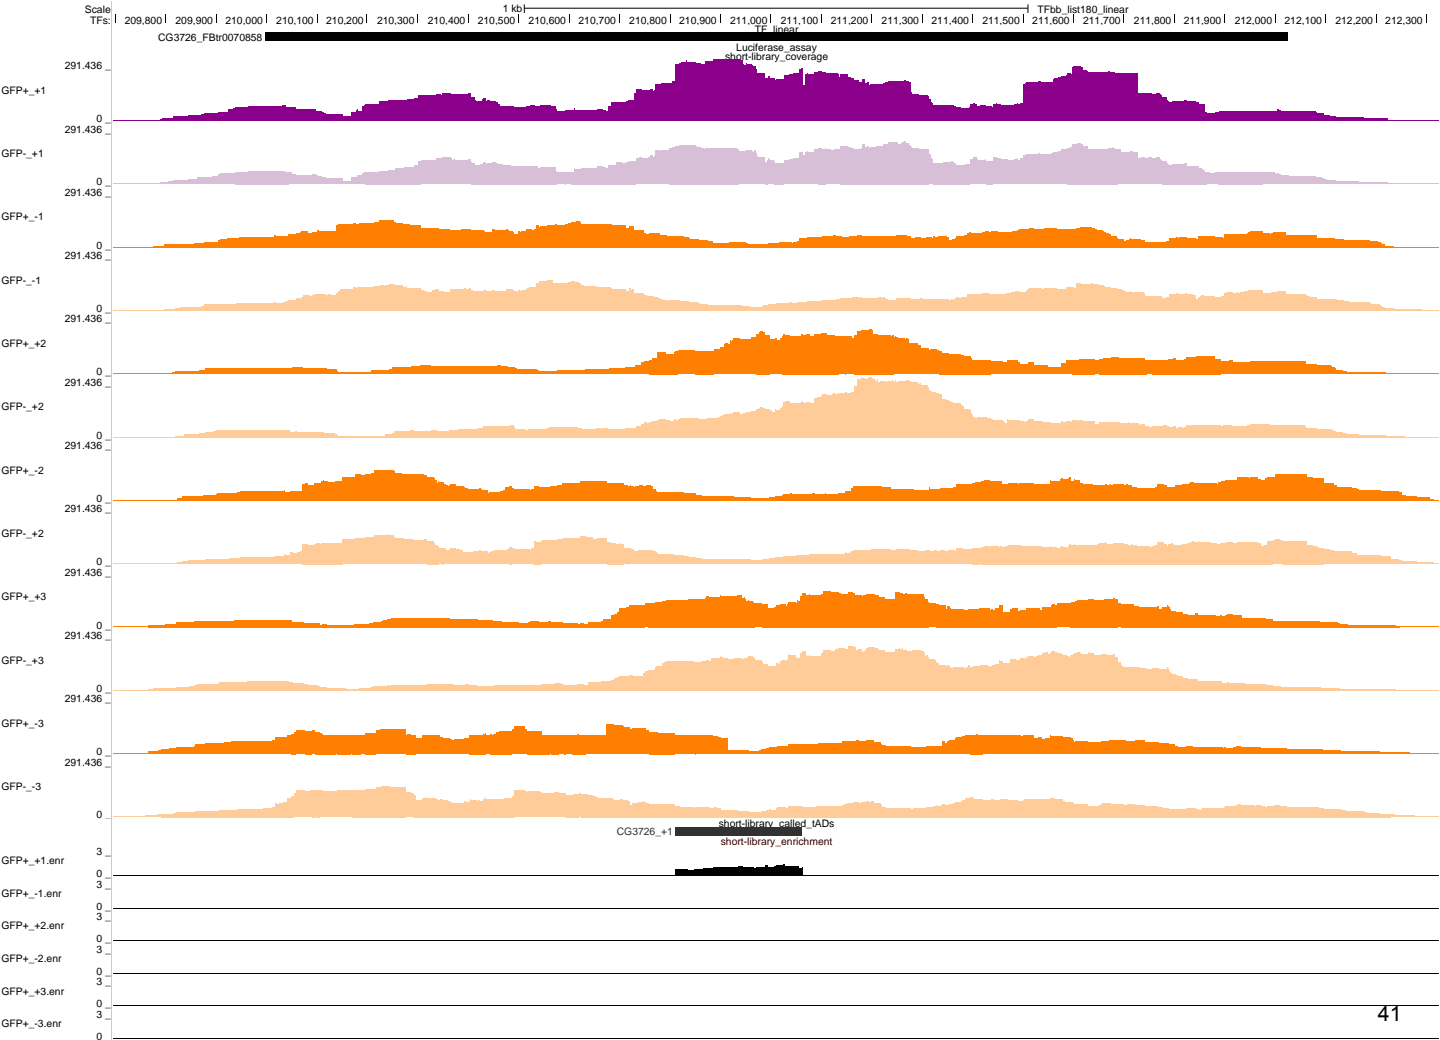

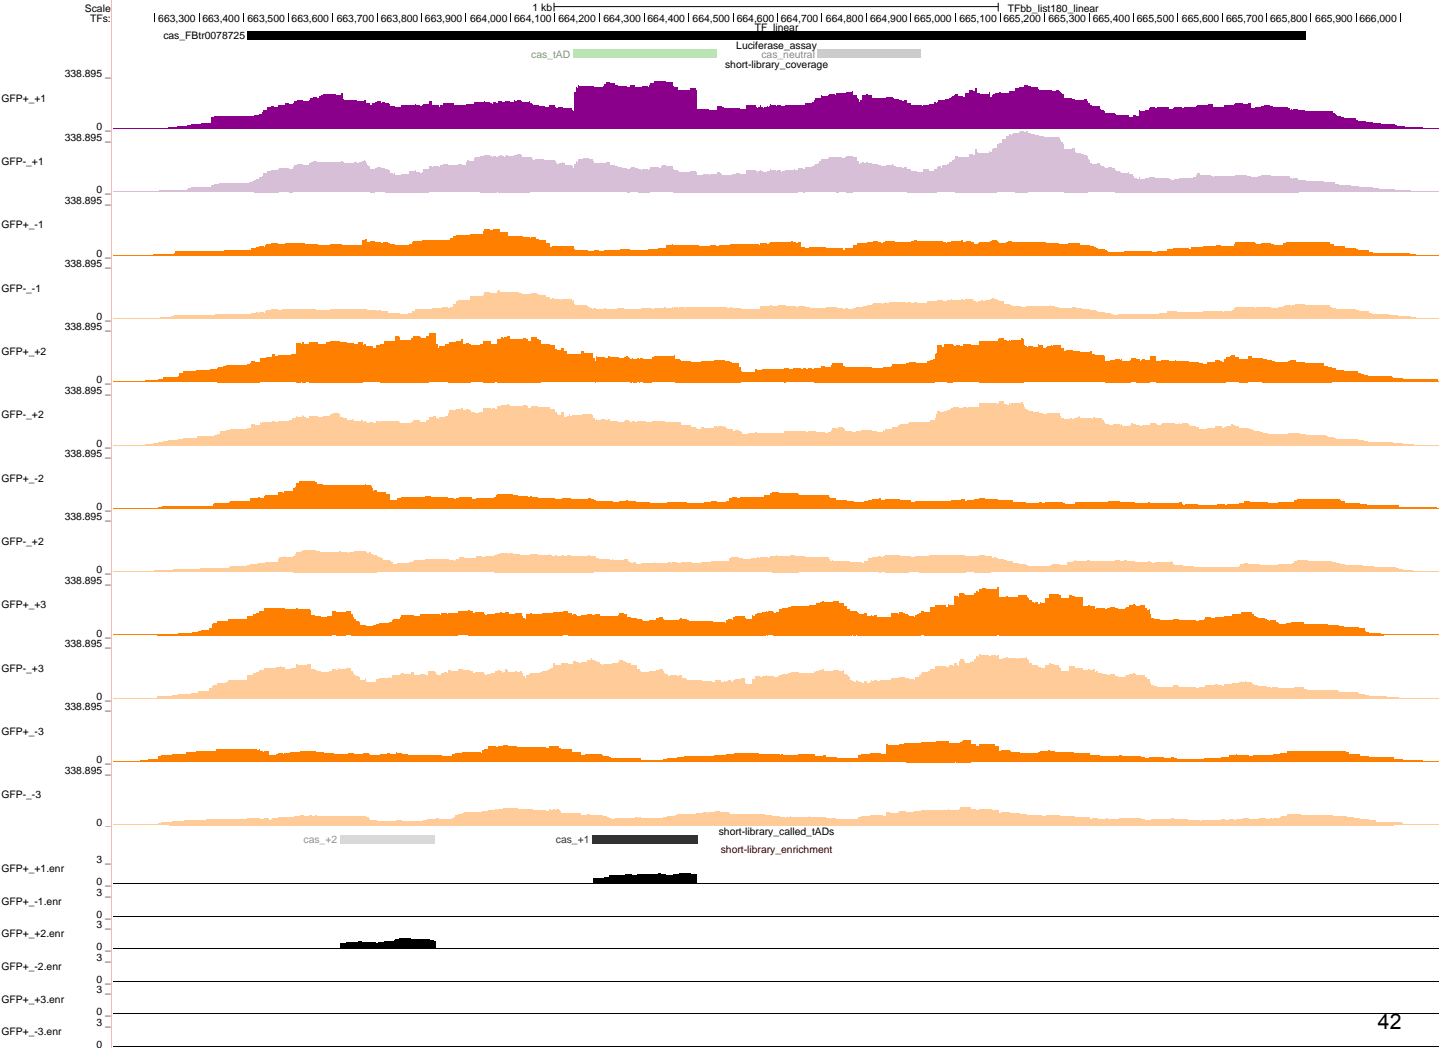

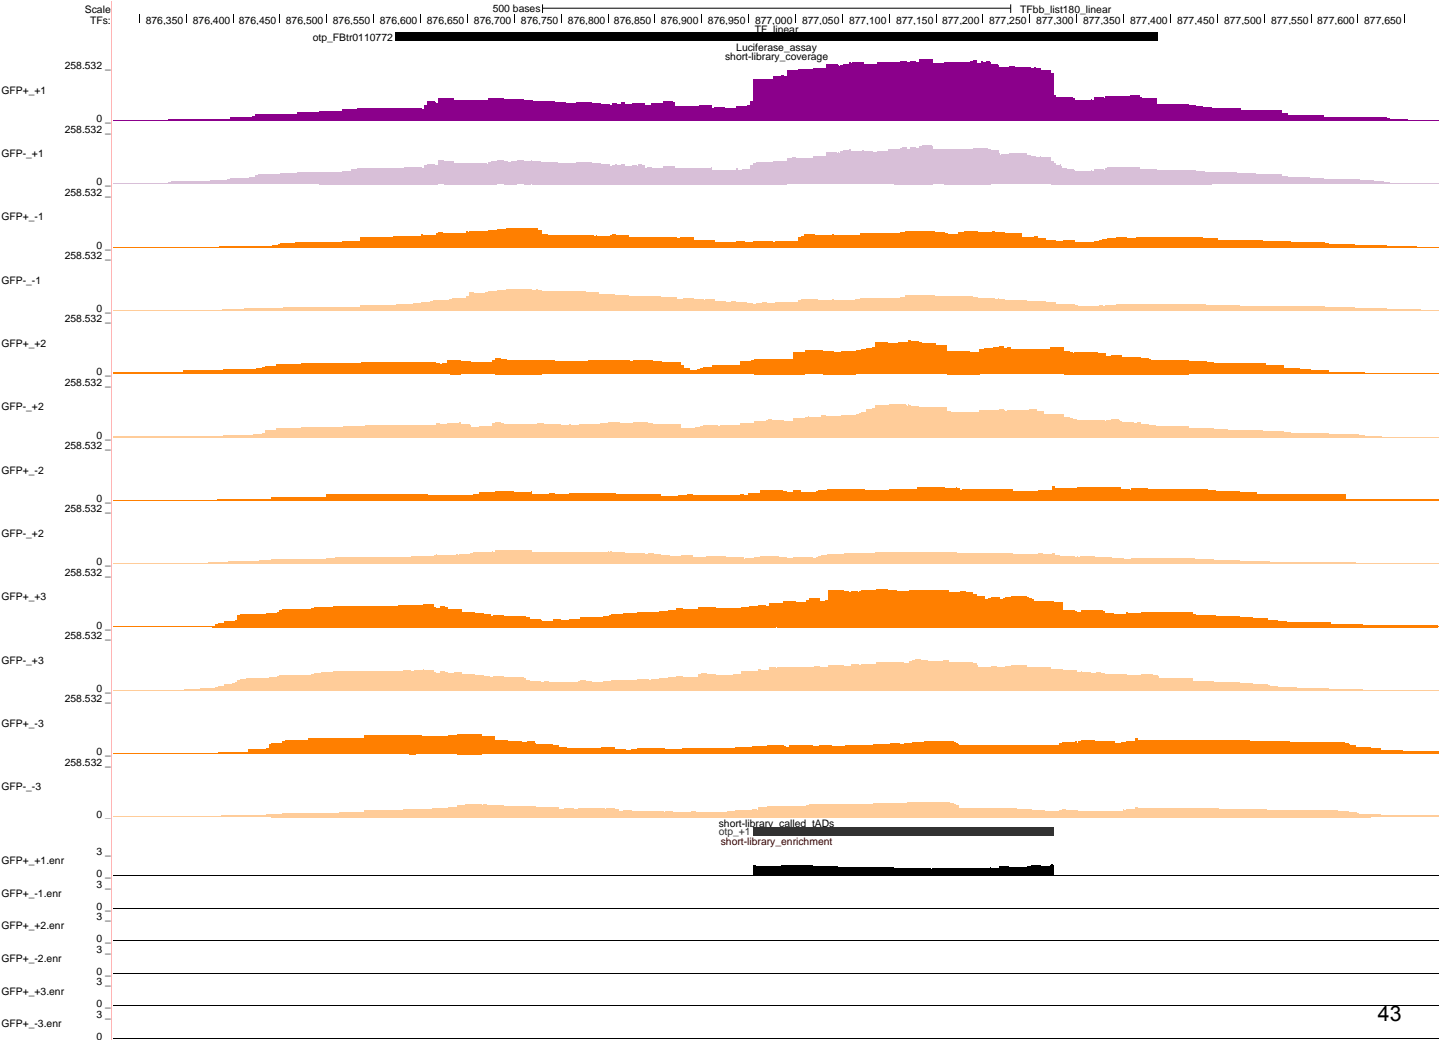

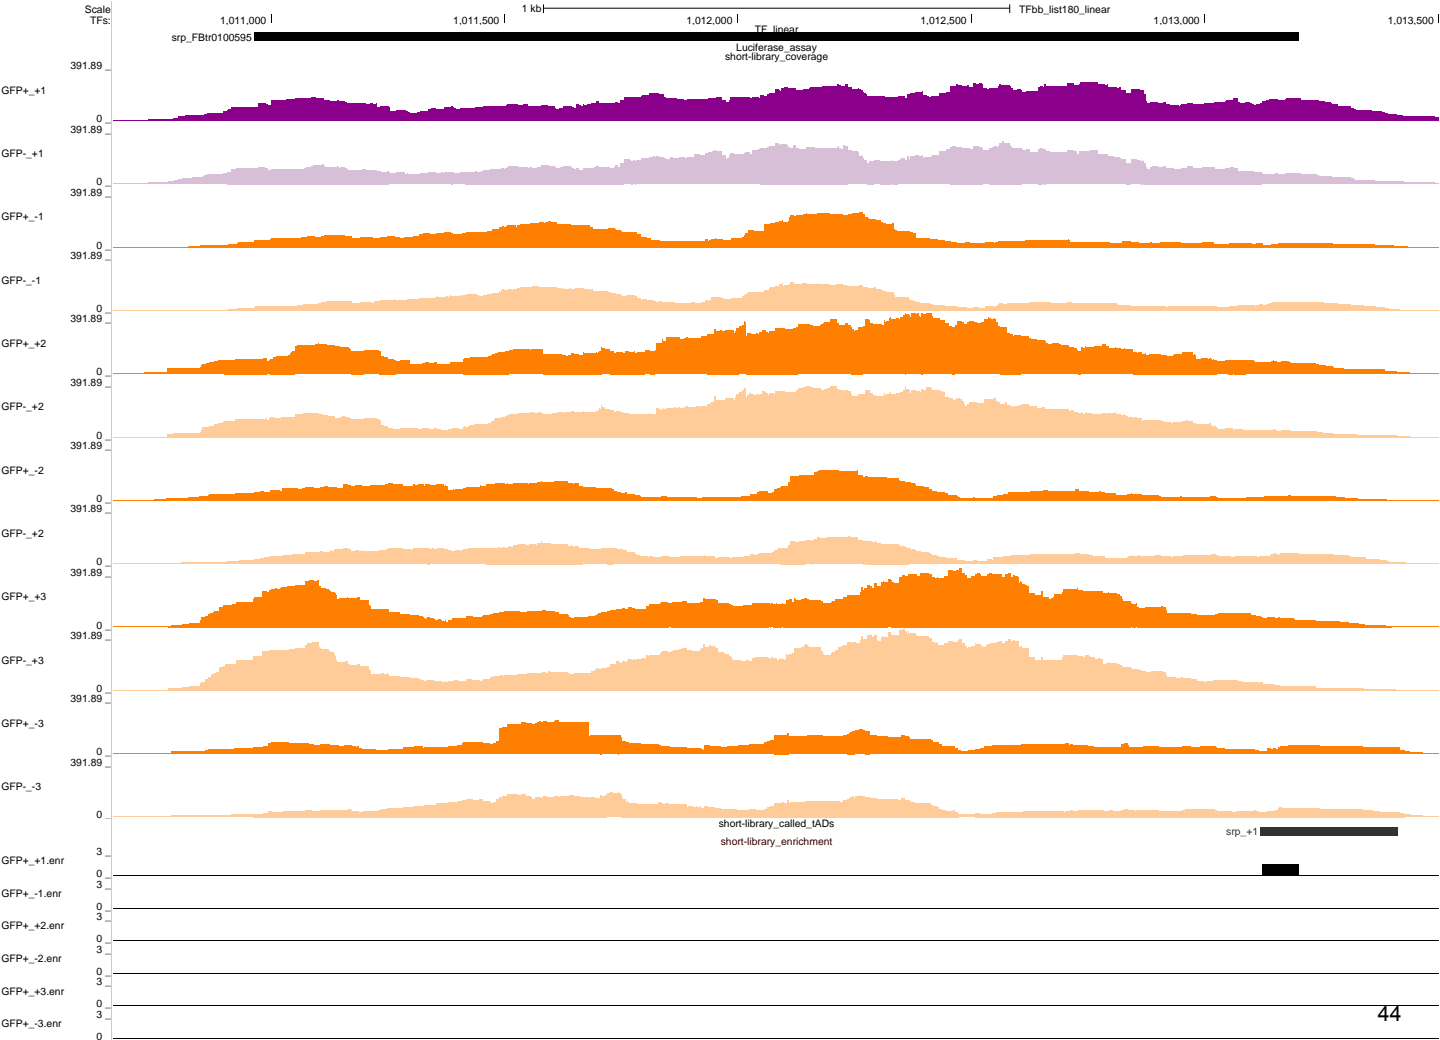



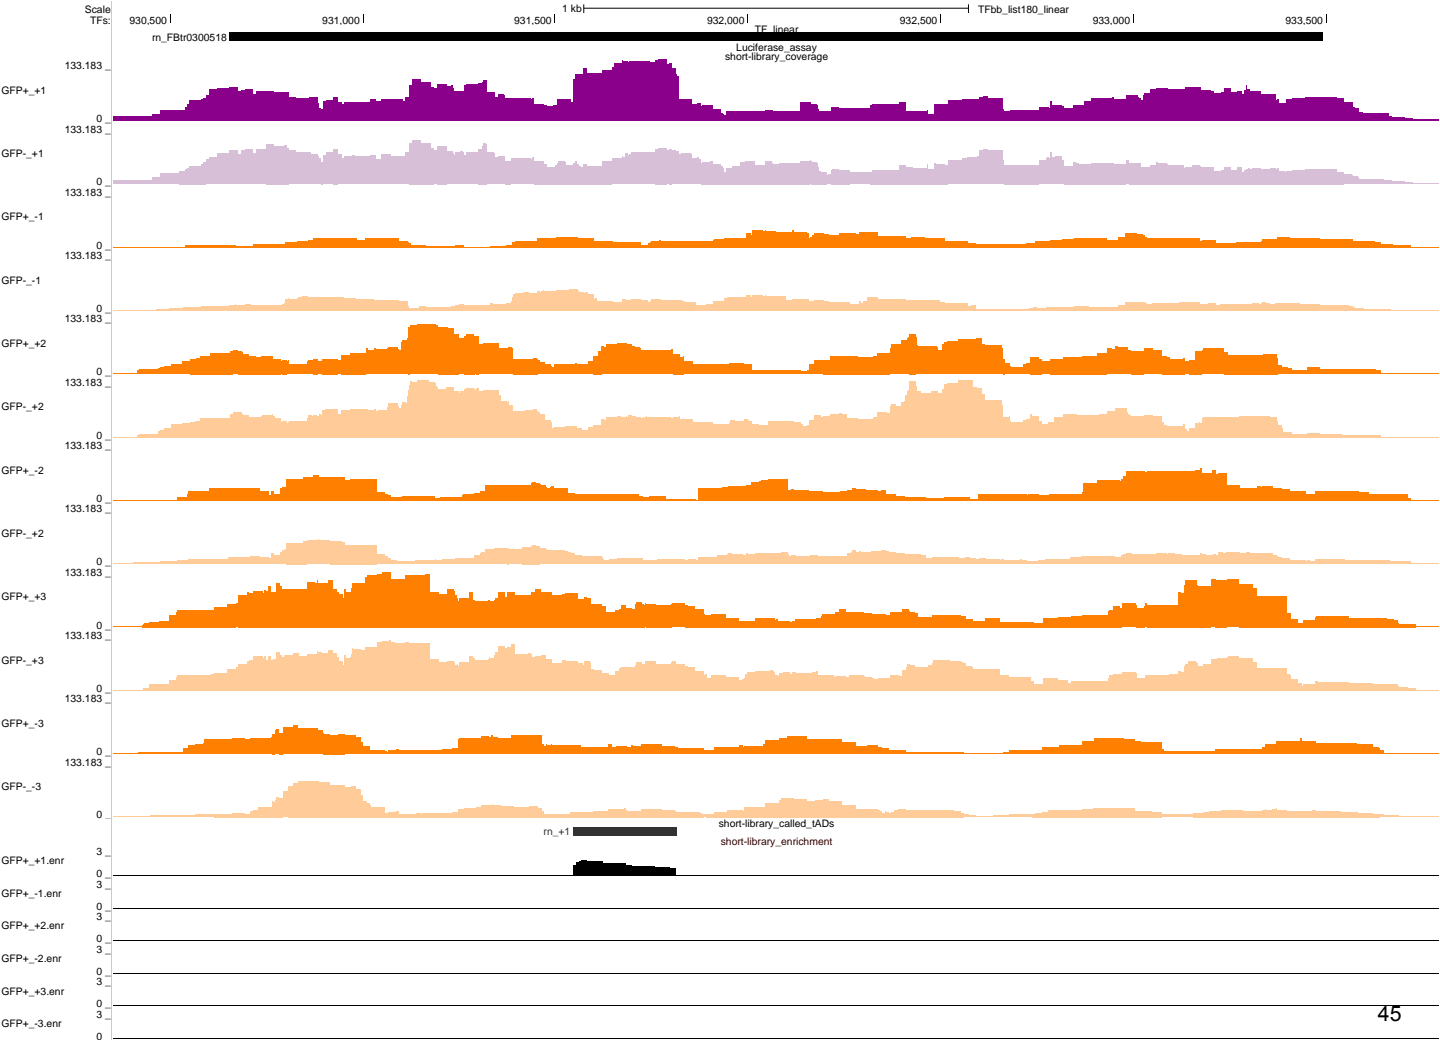





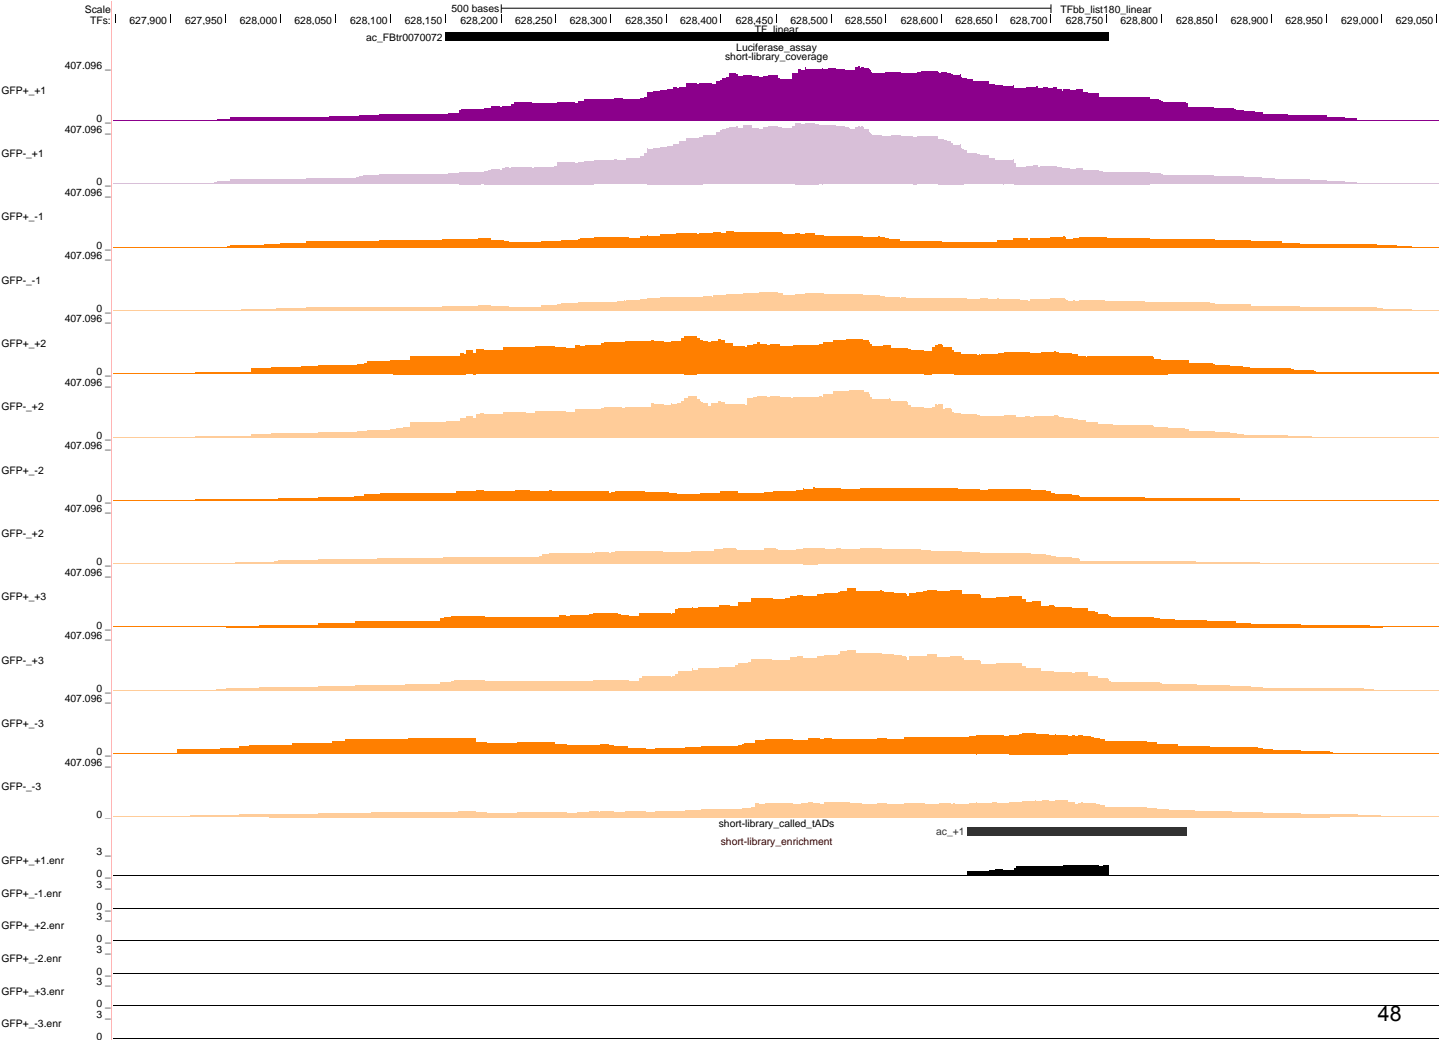

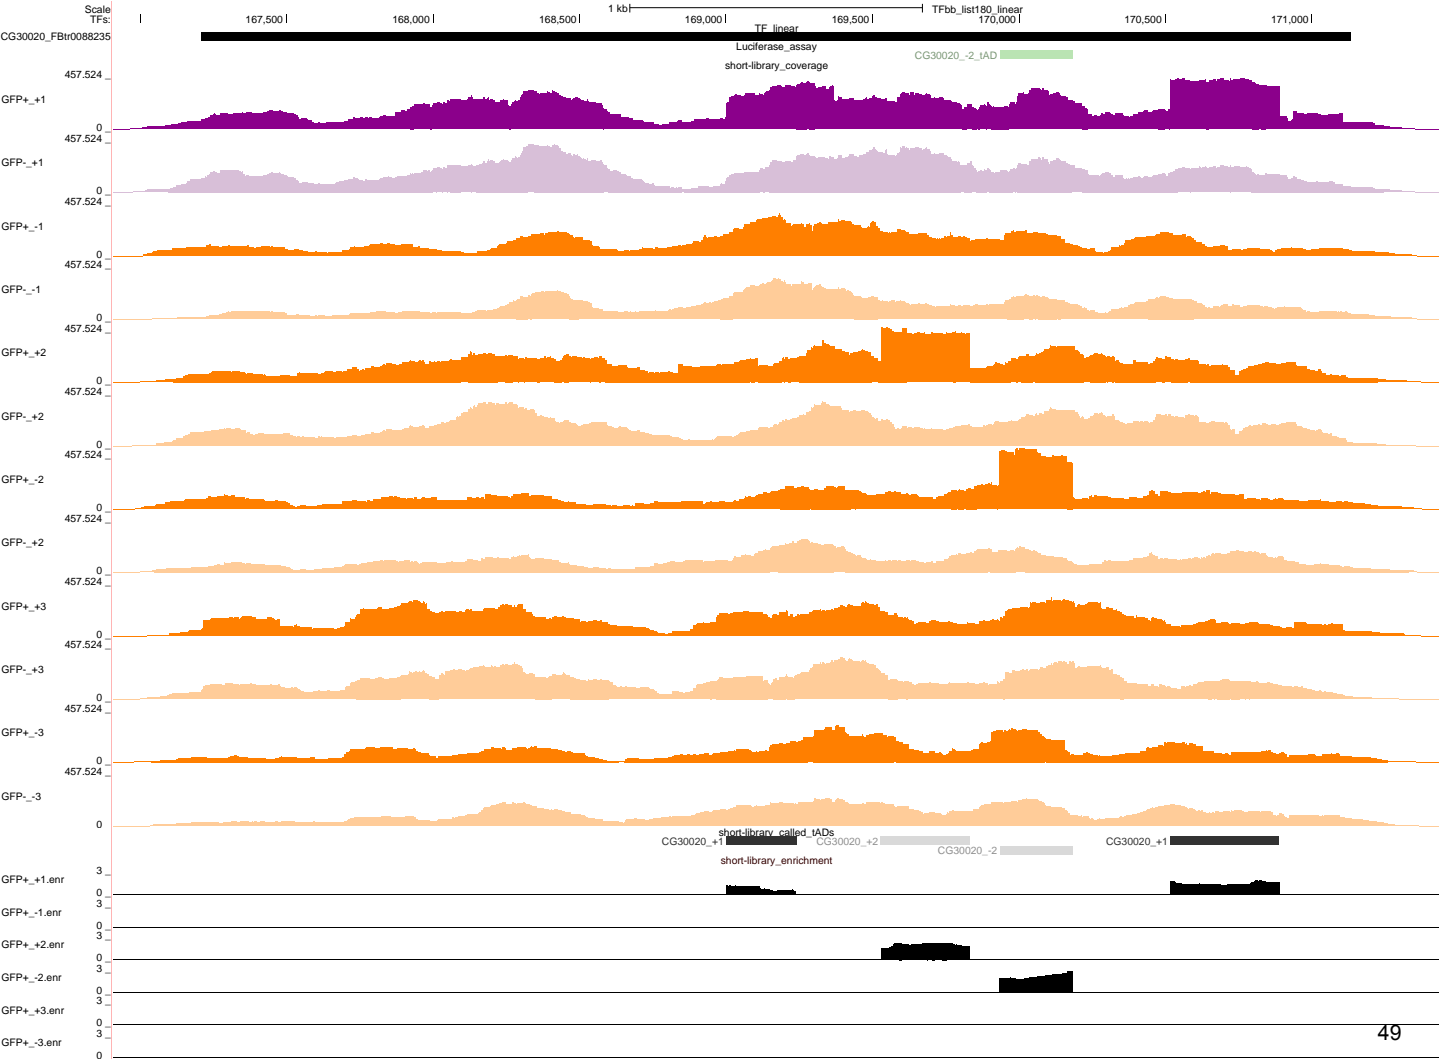

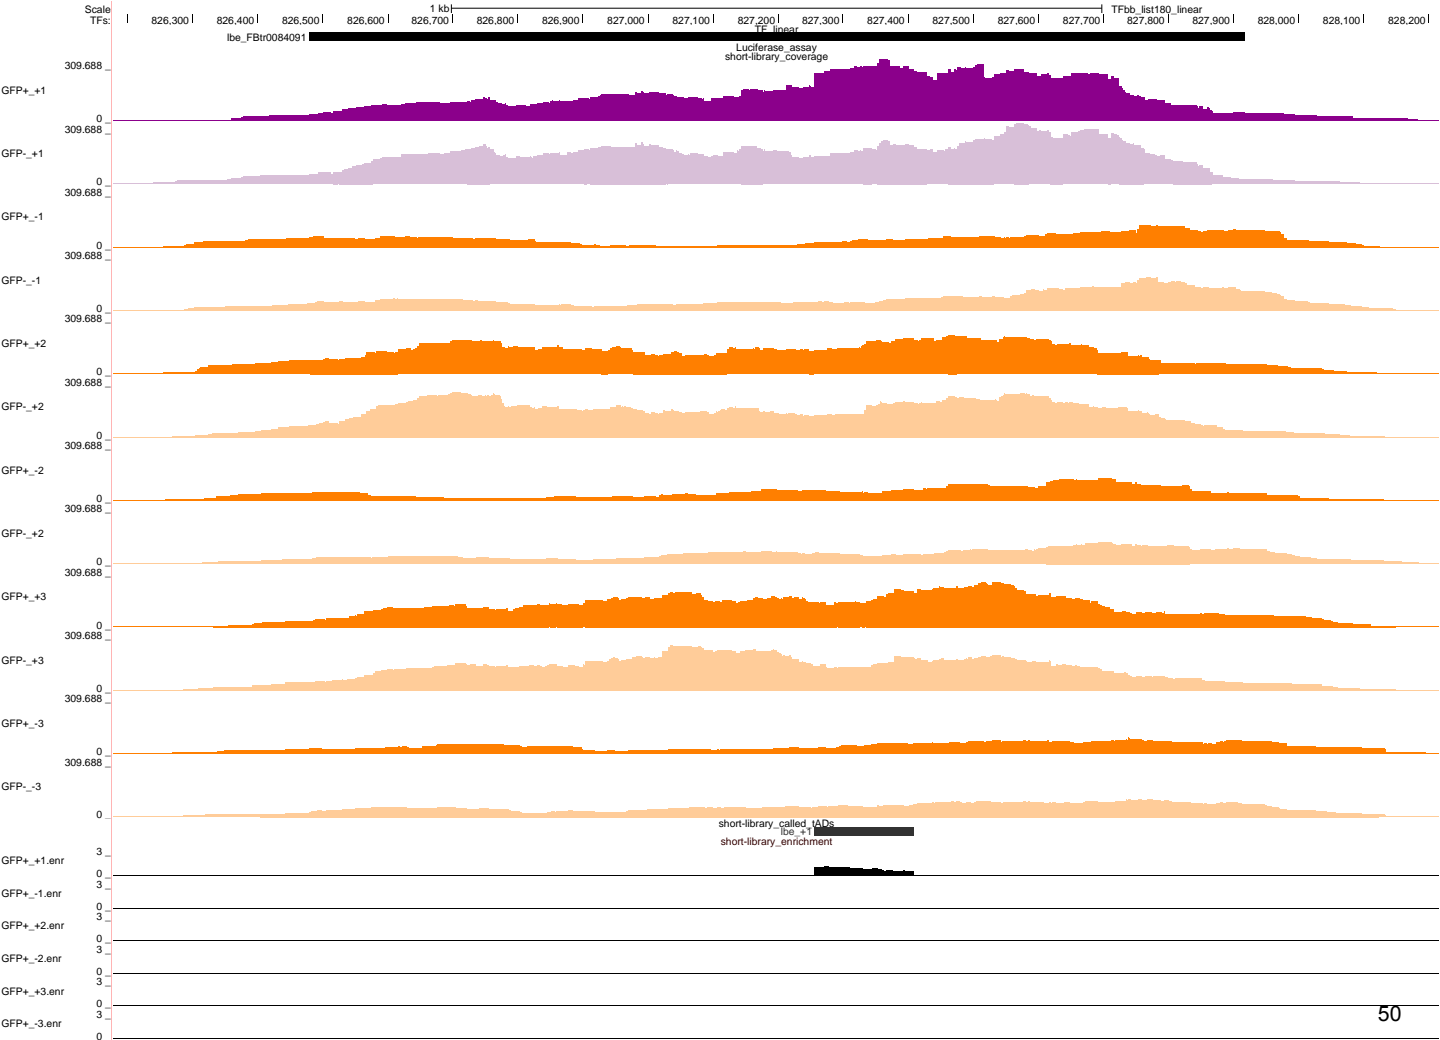

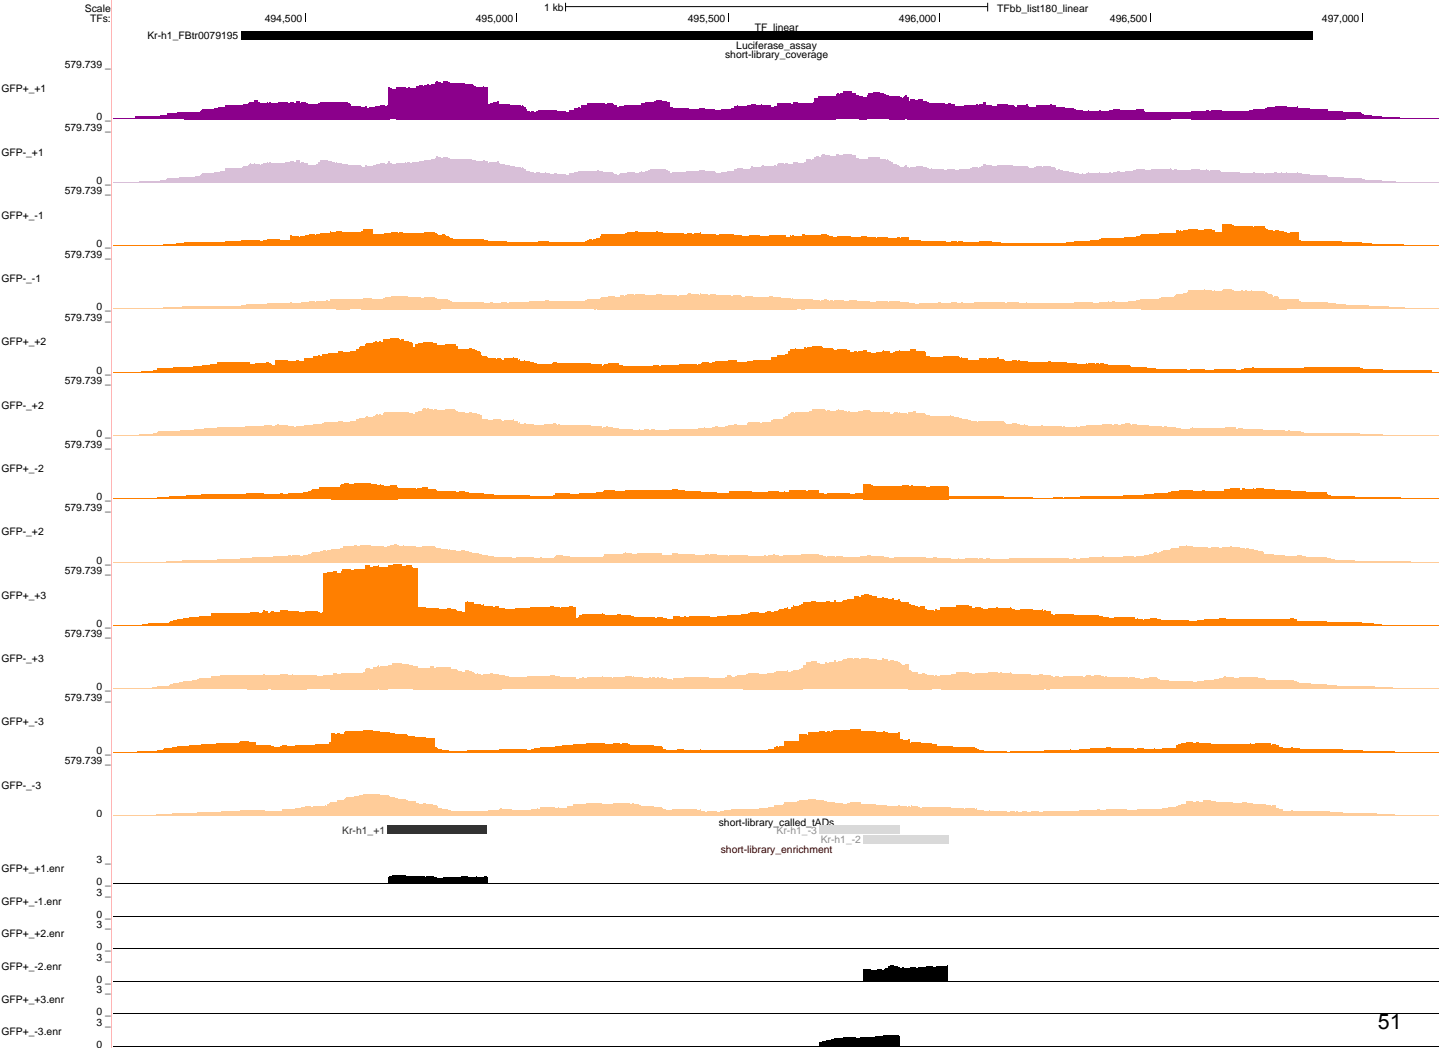

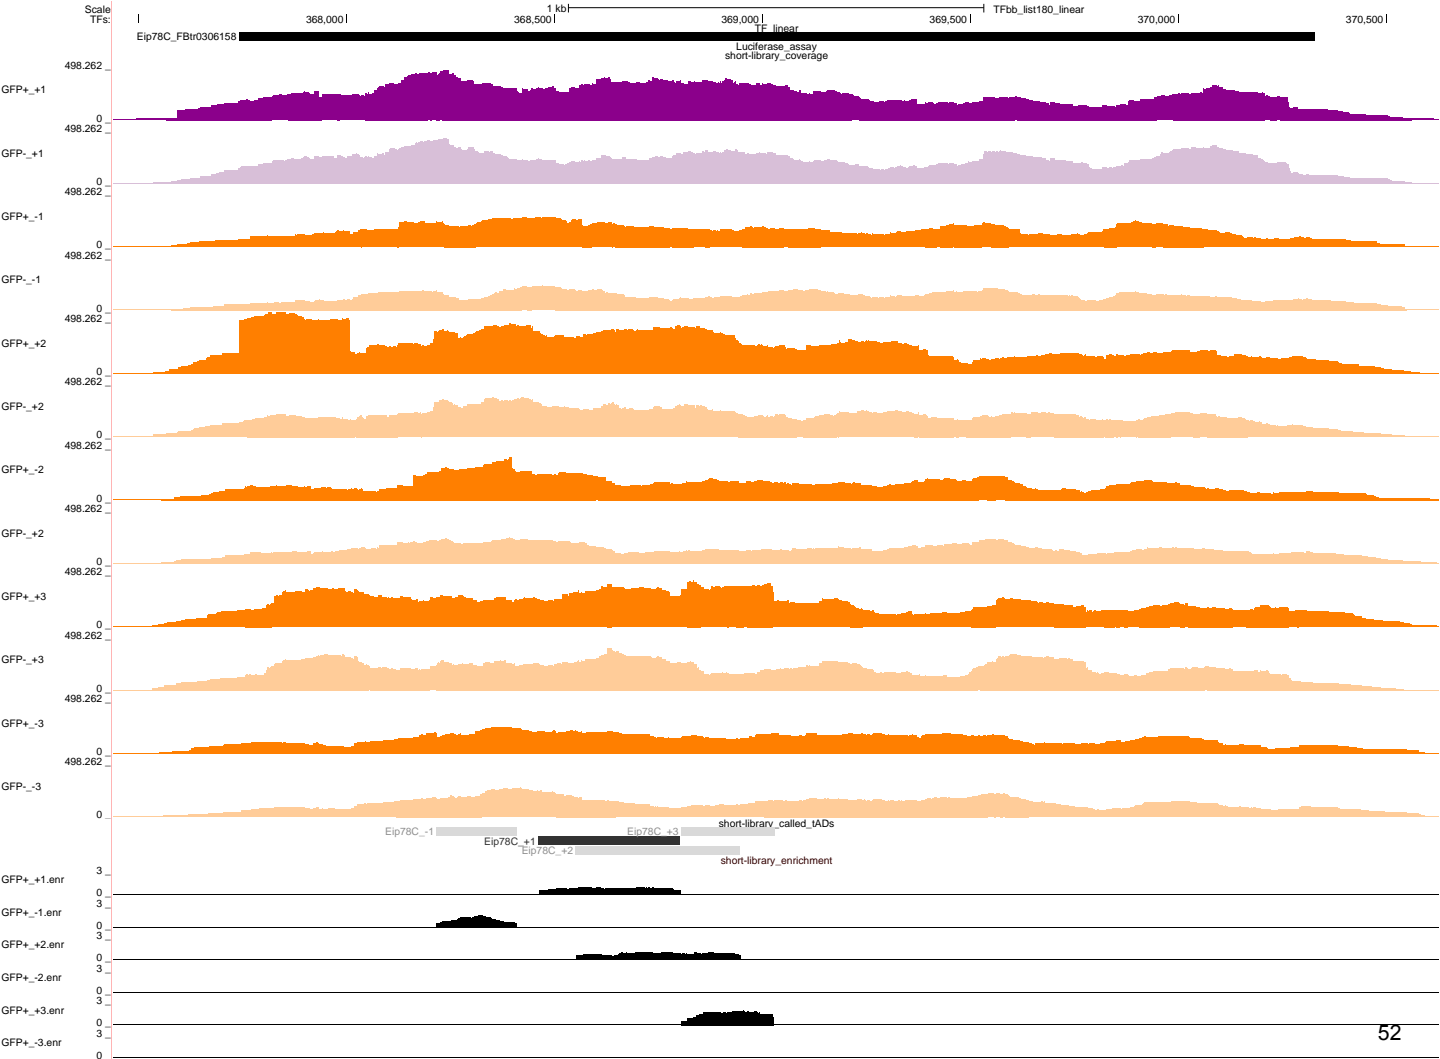



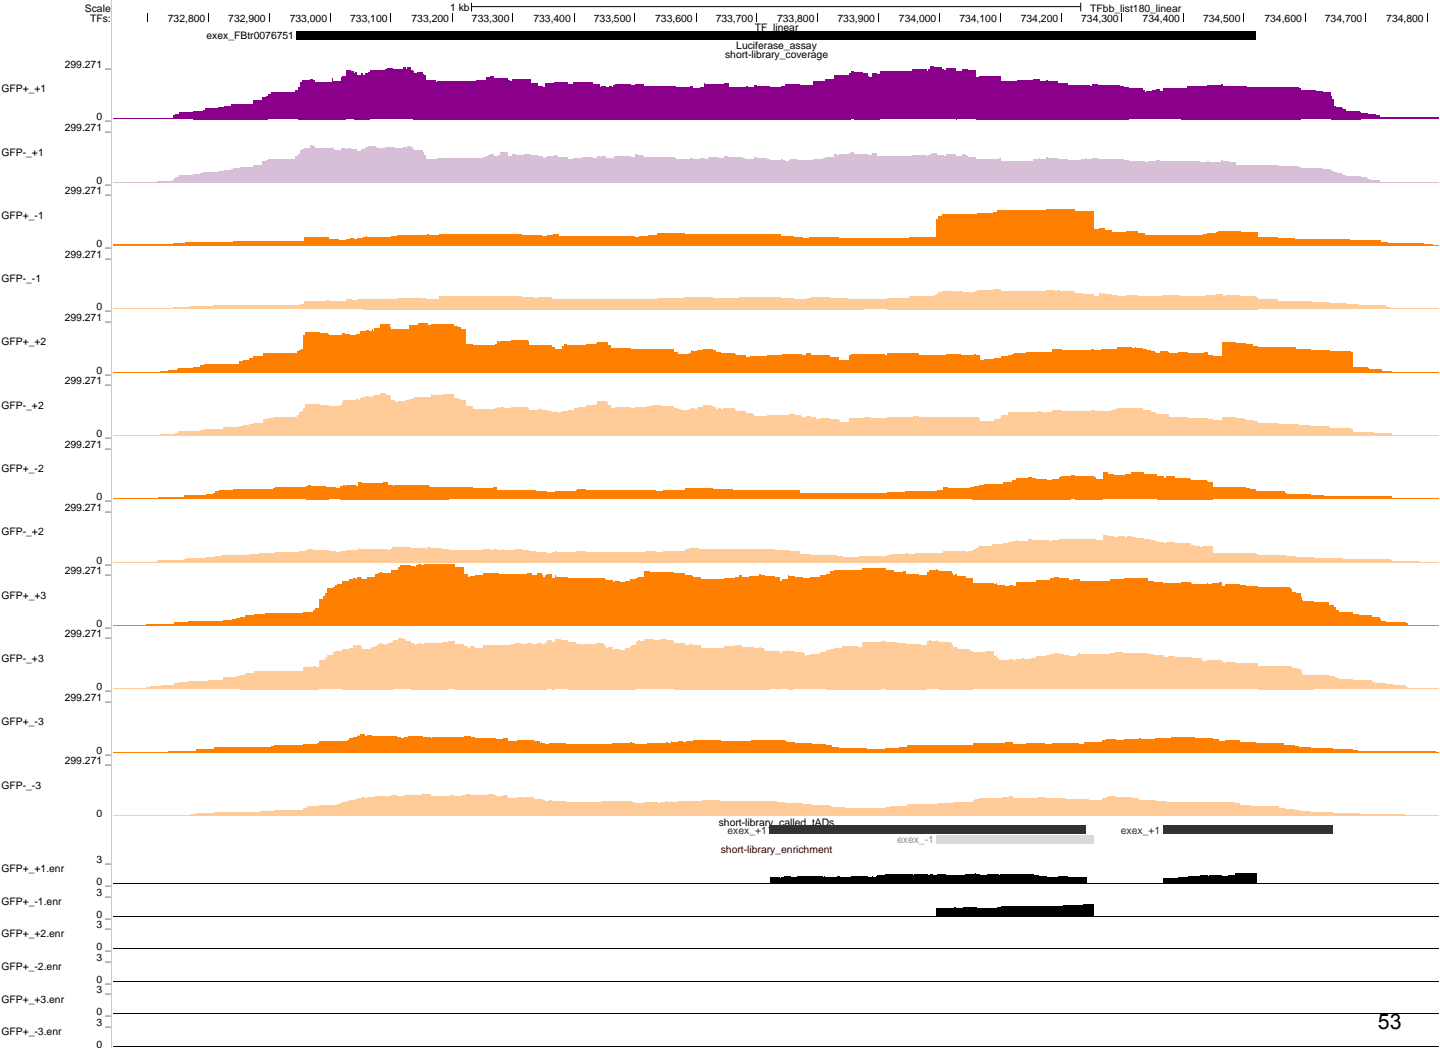



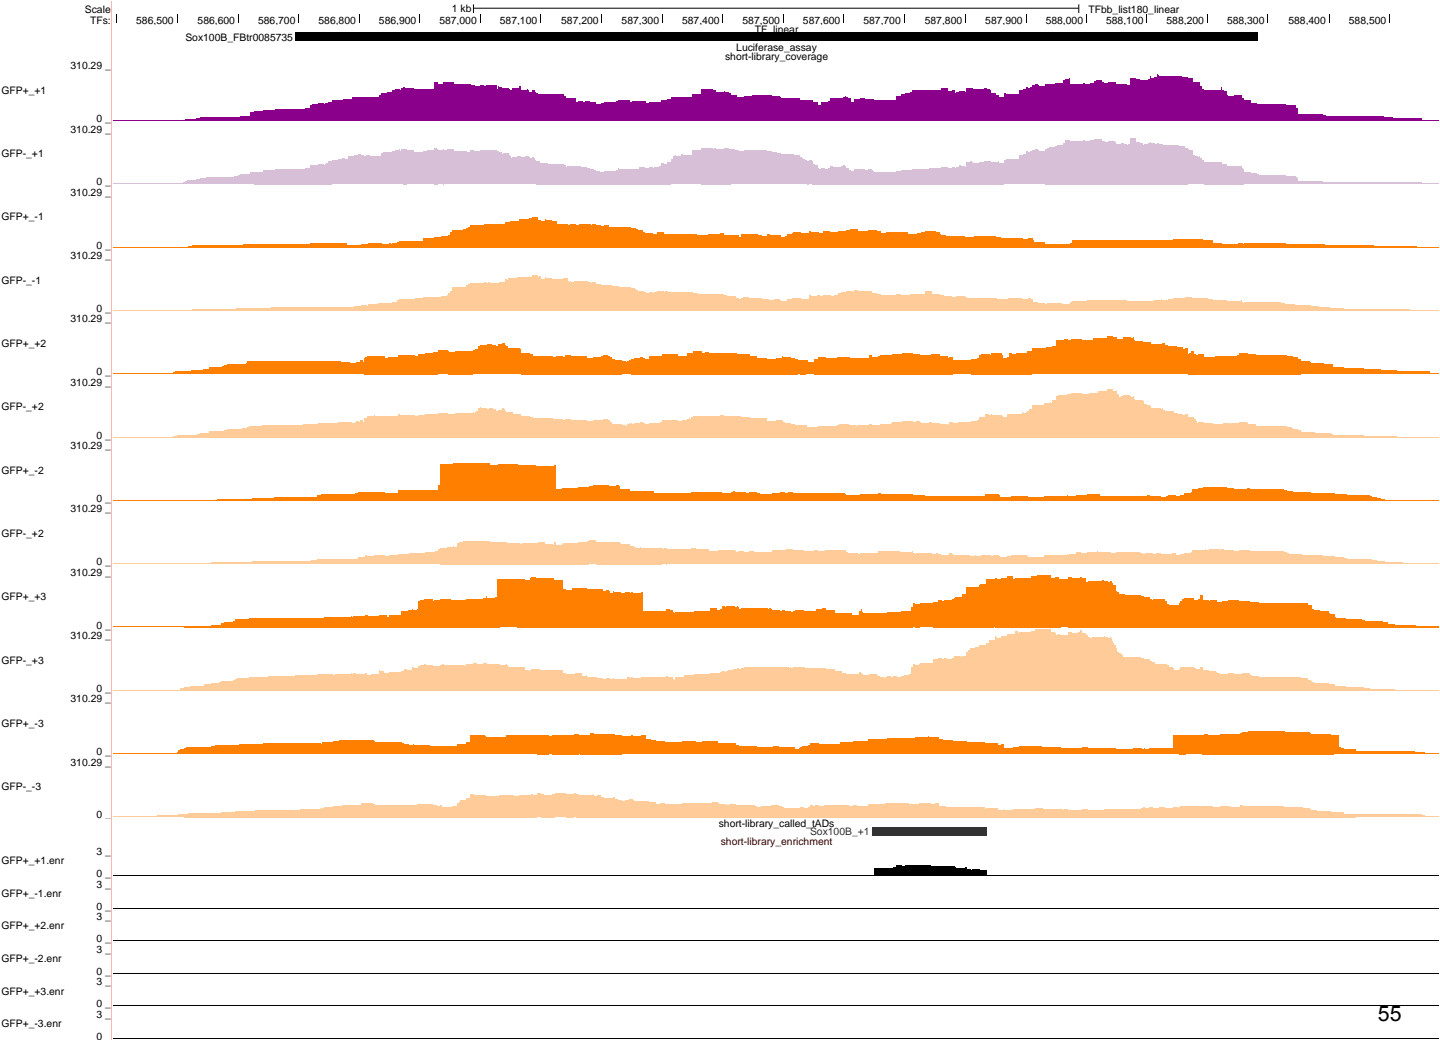

## **Appendix Figure S2**

103 short-fragment library non-native frame tADs



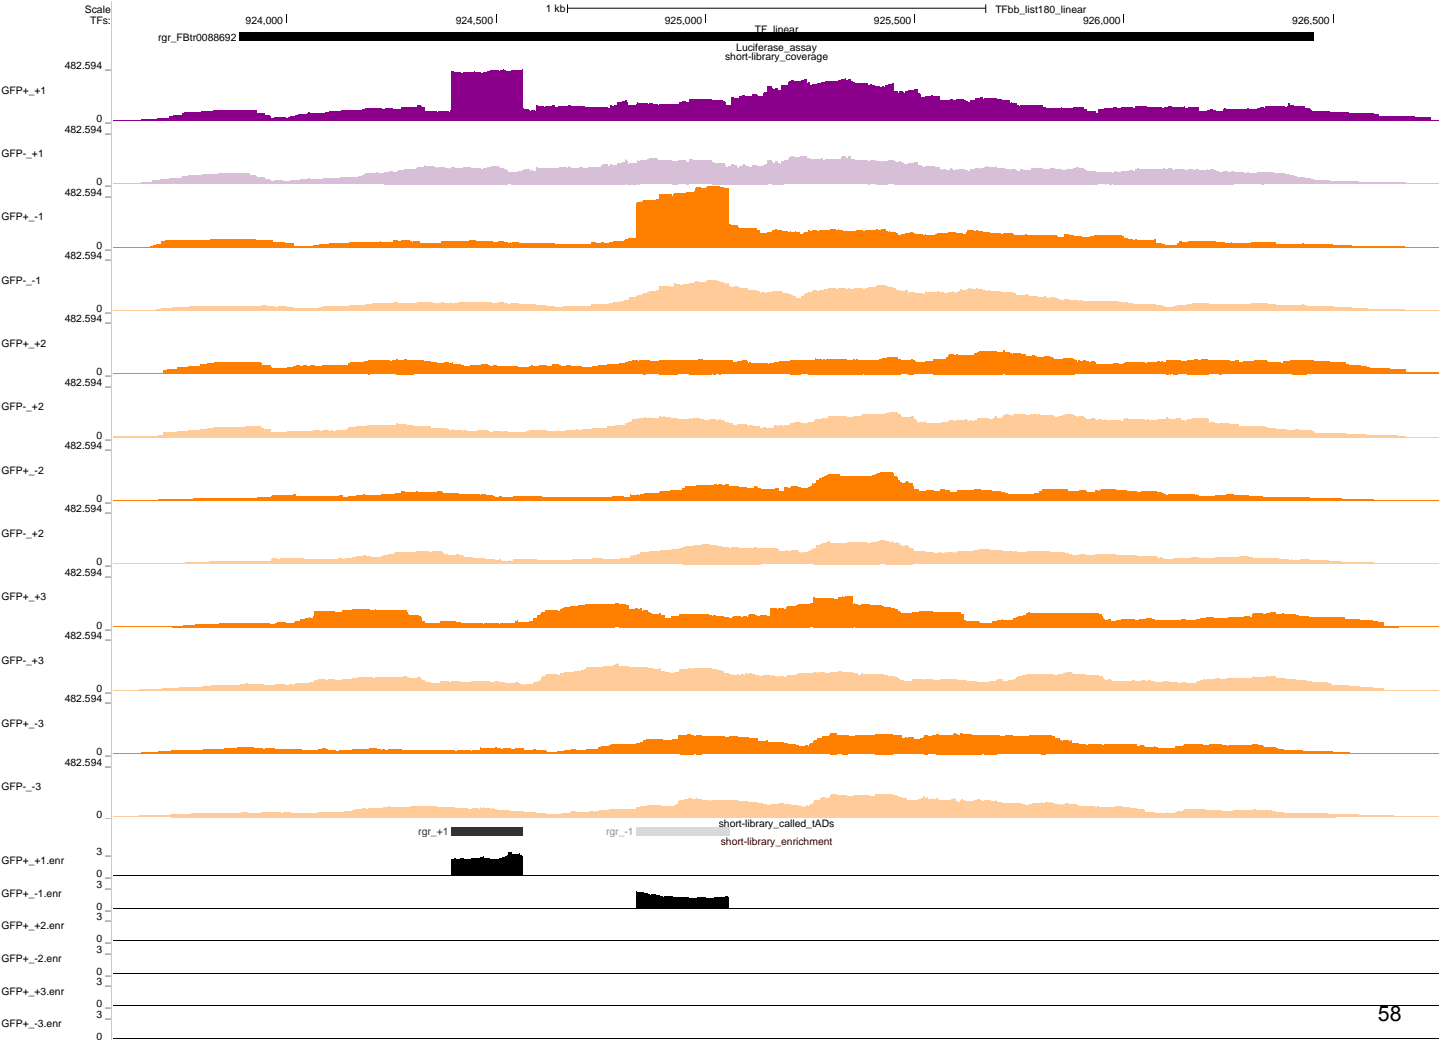

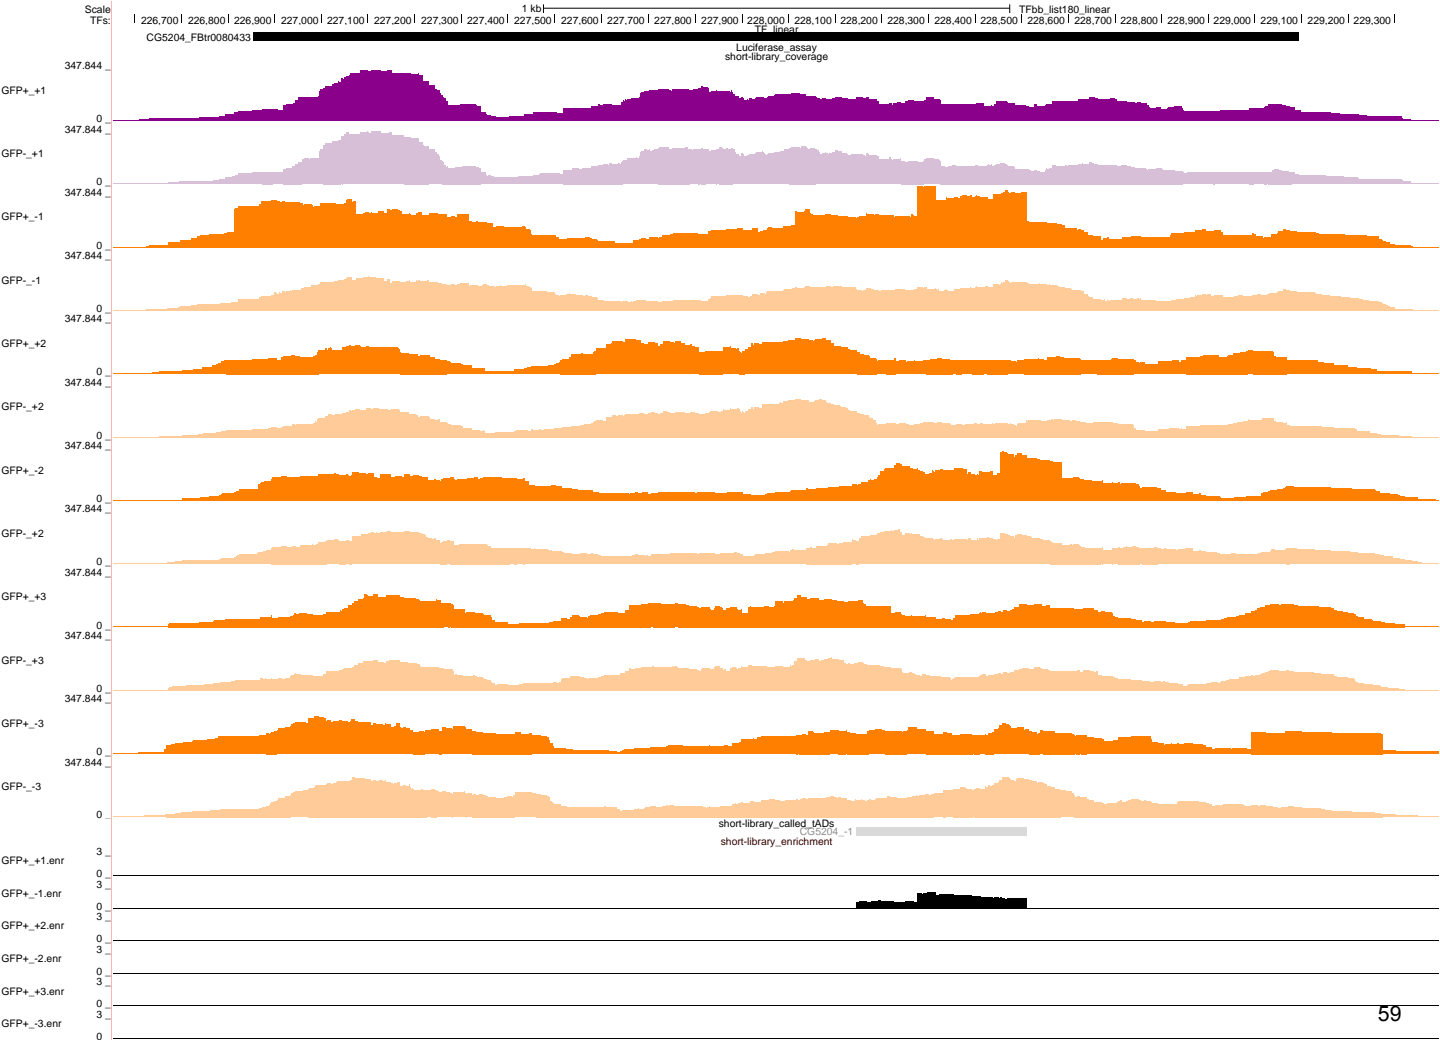

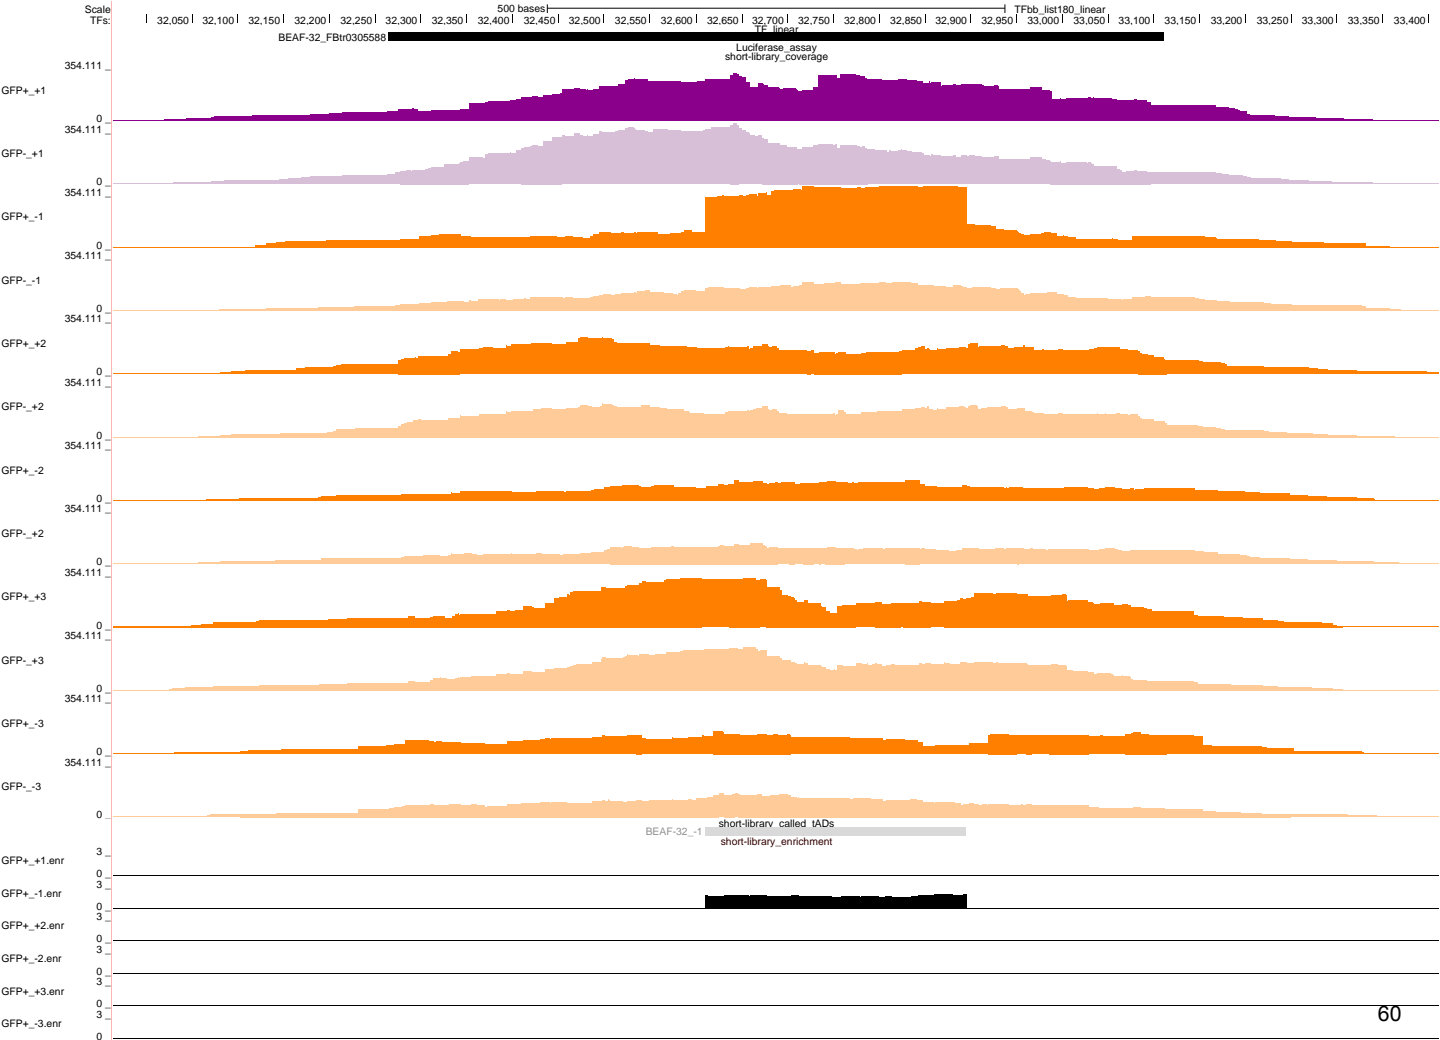



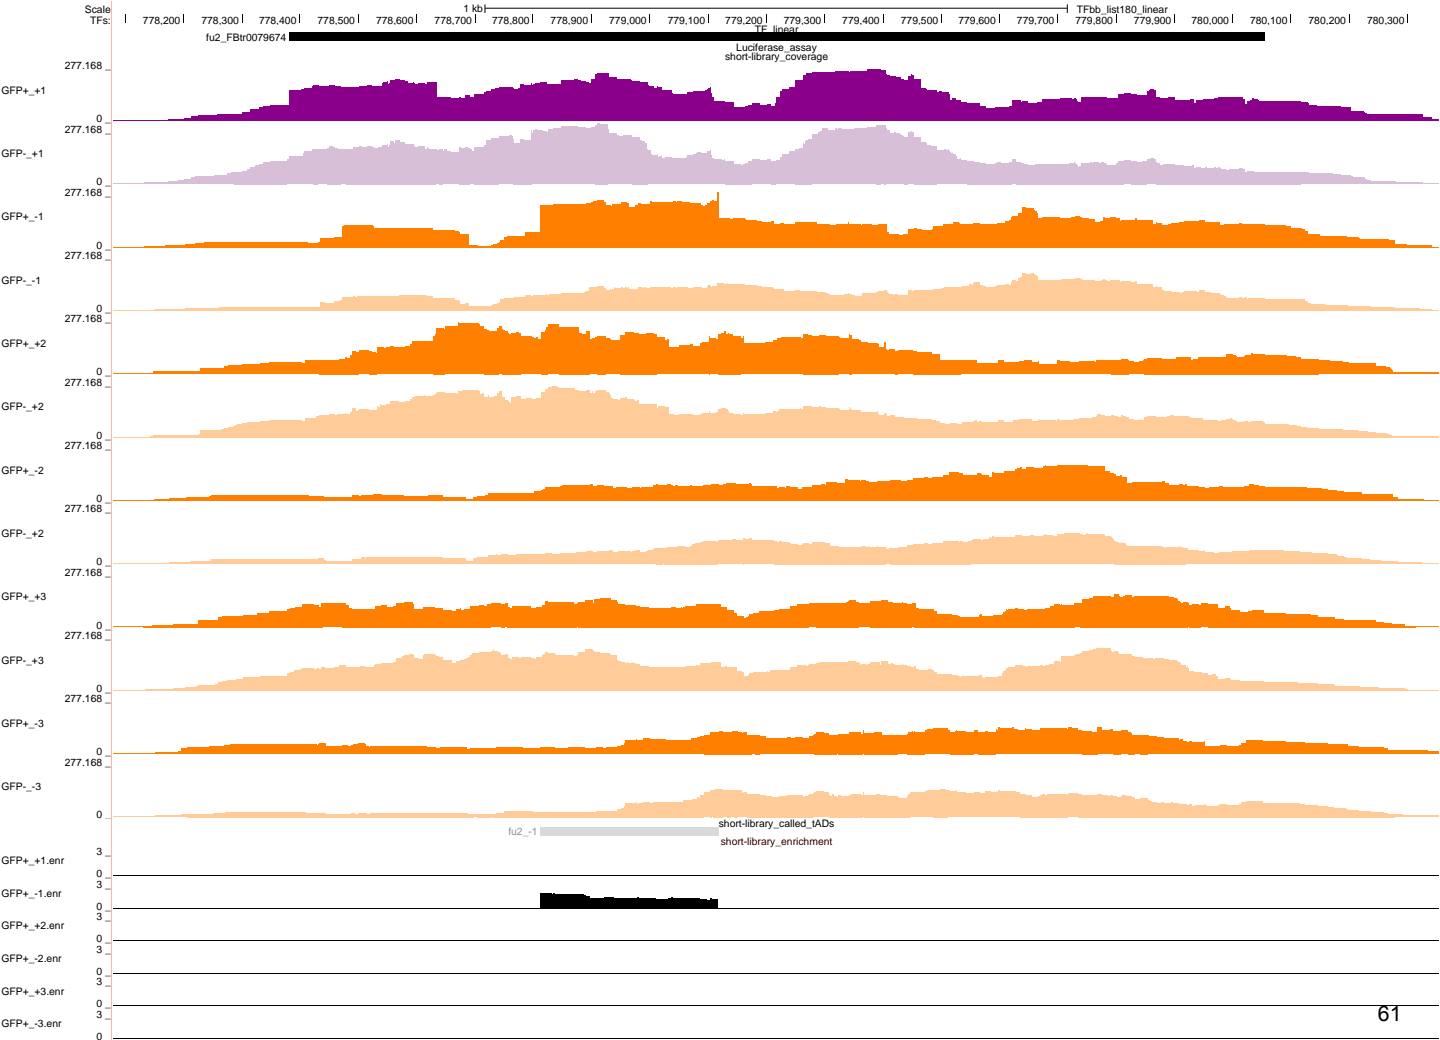

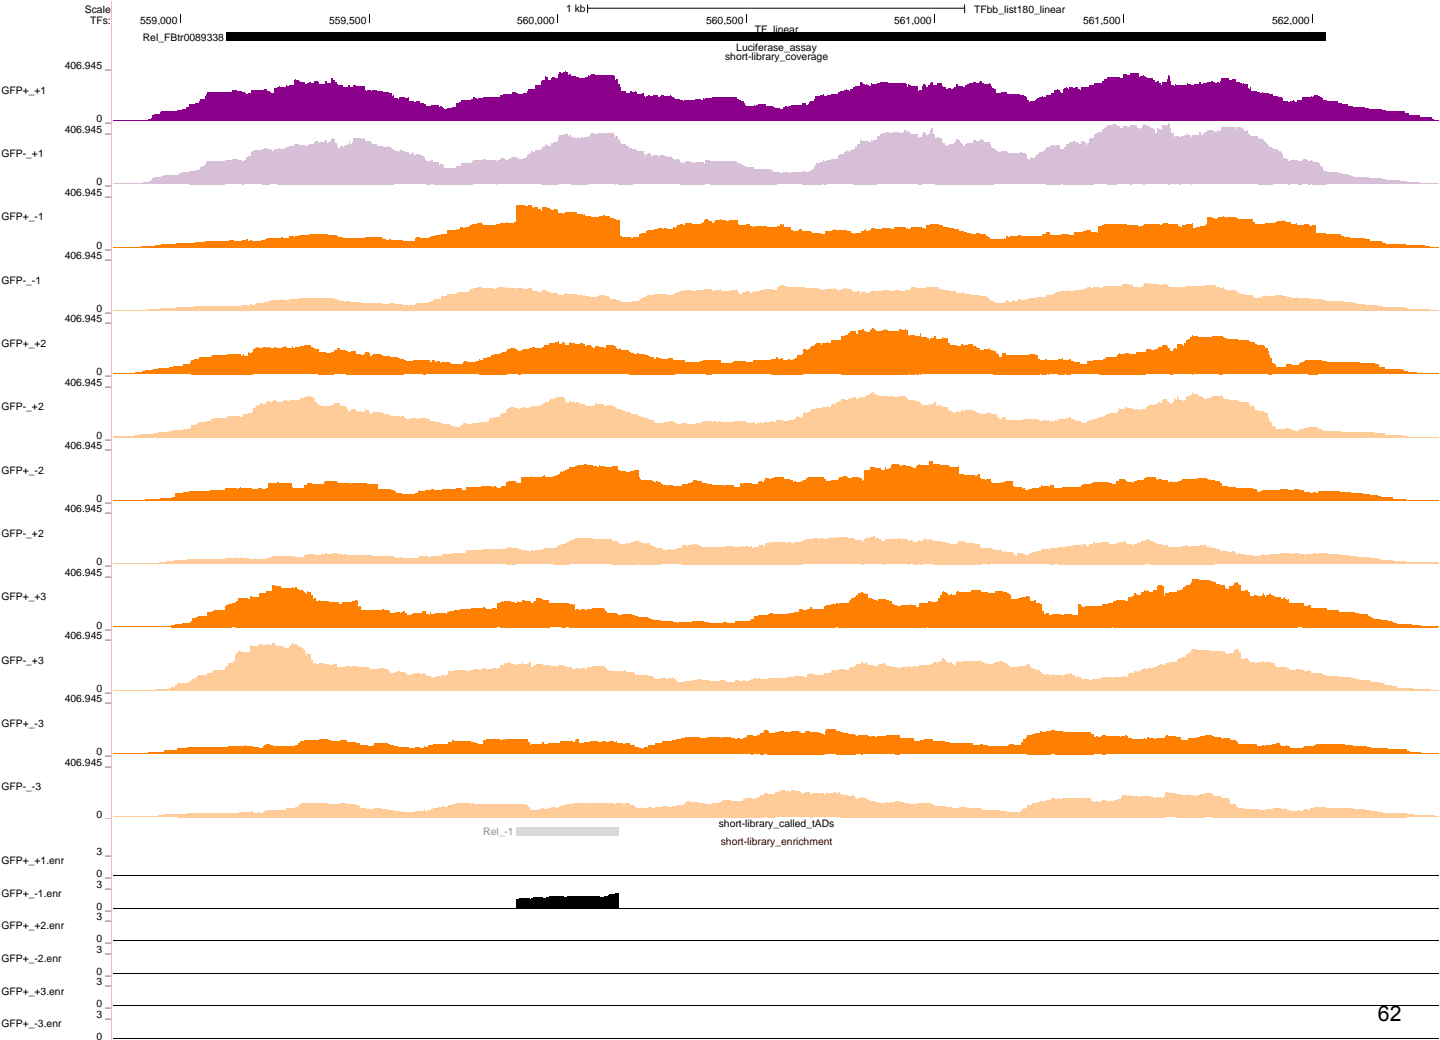

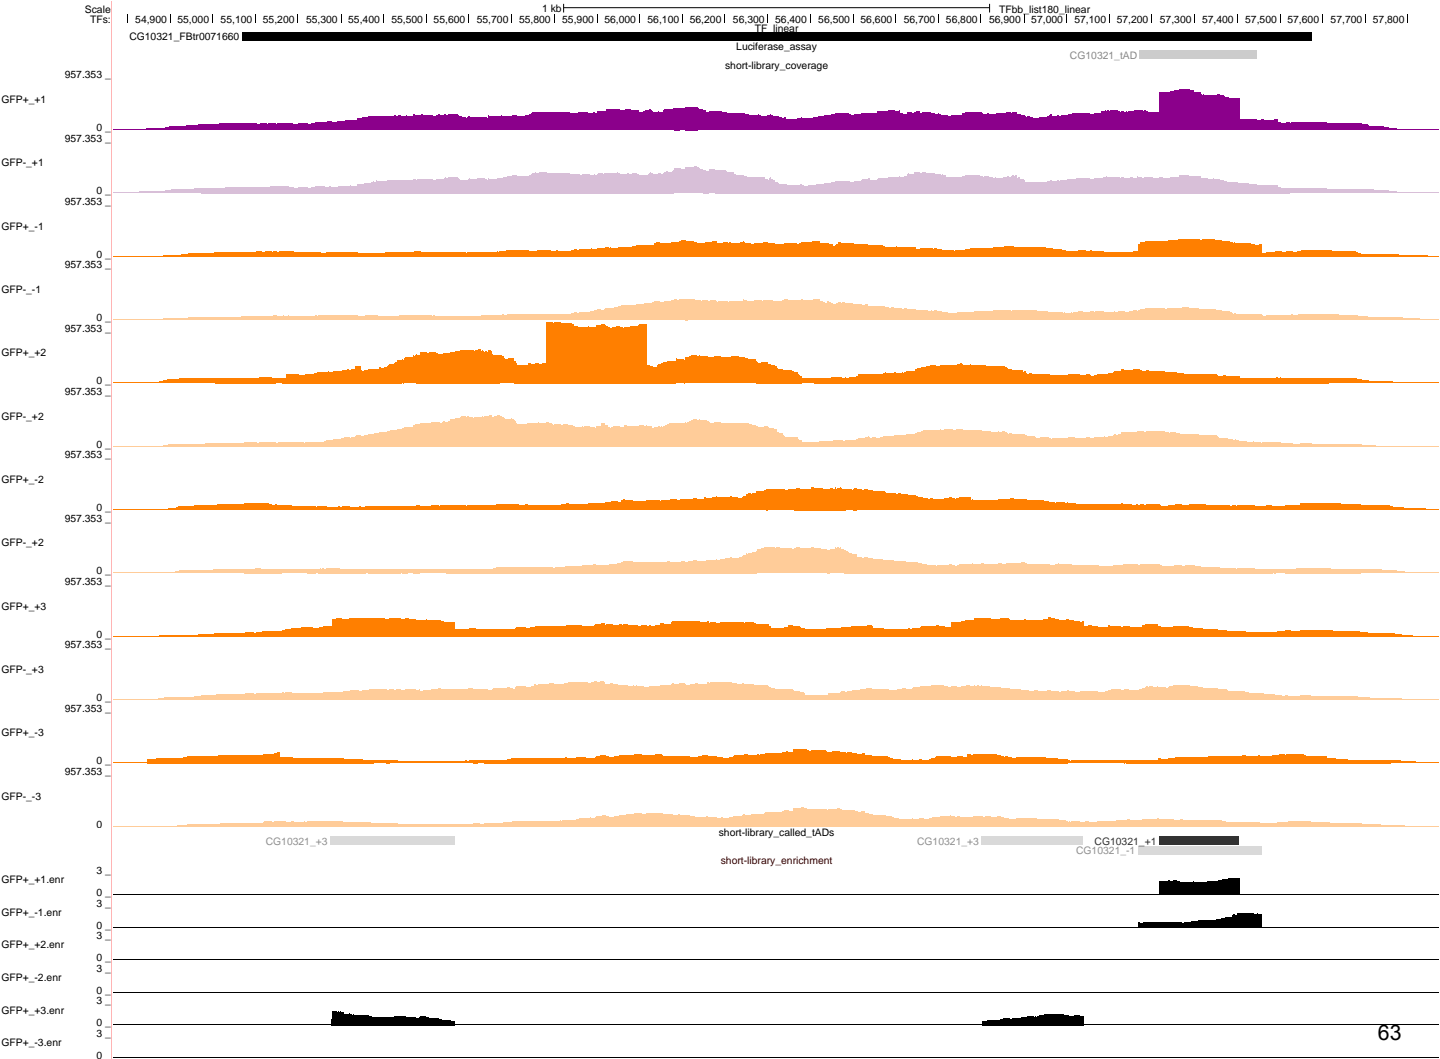

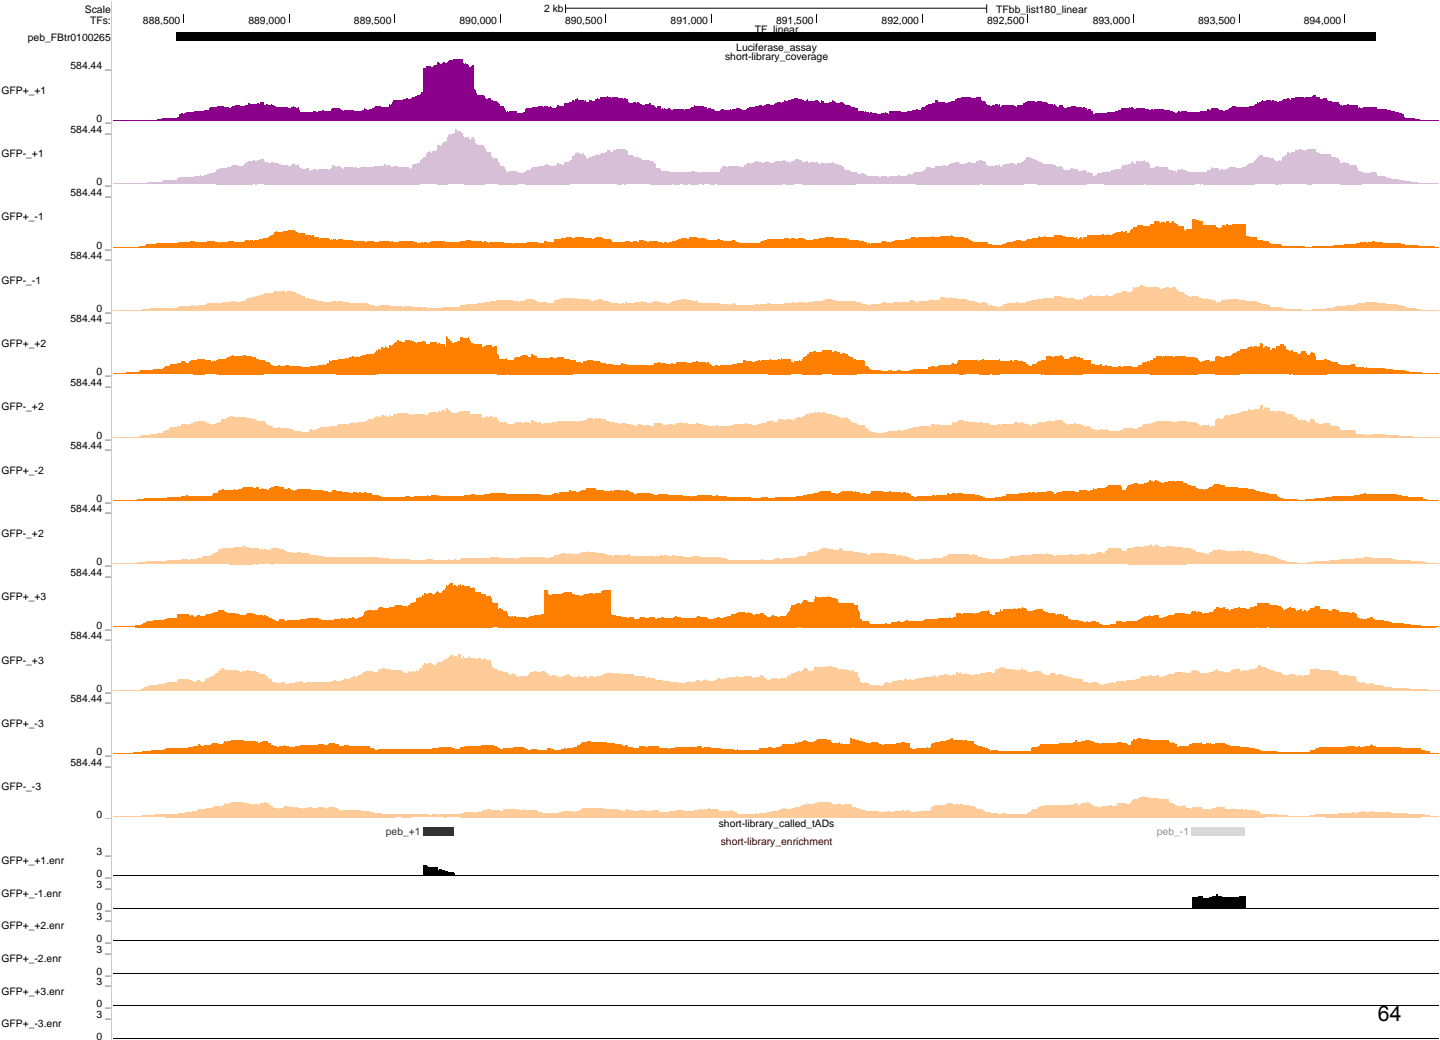



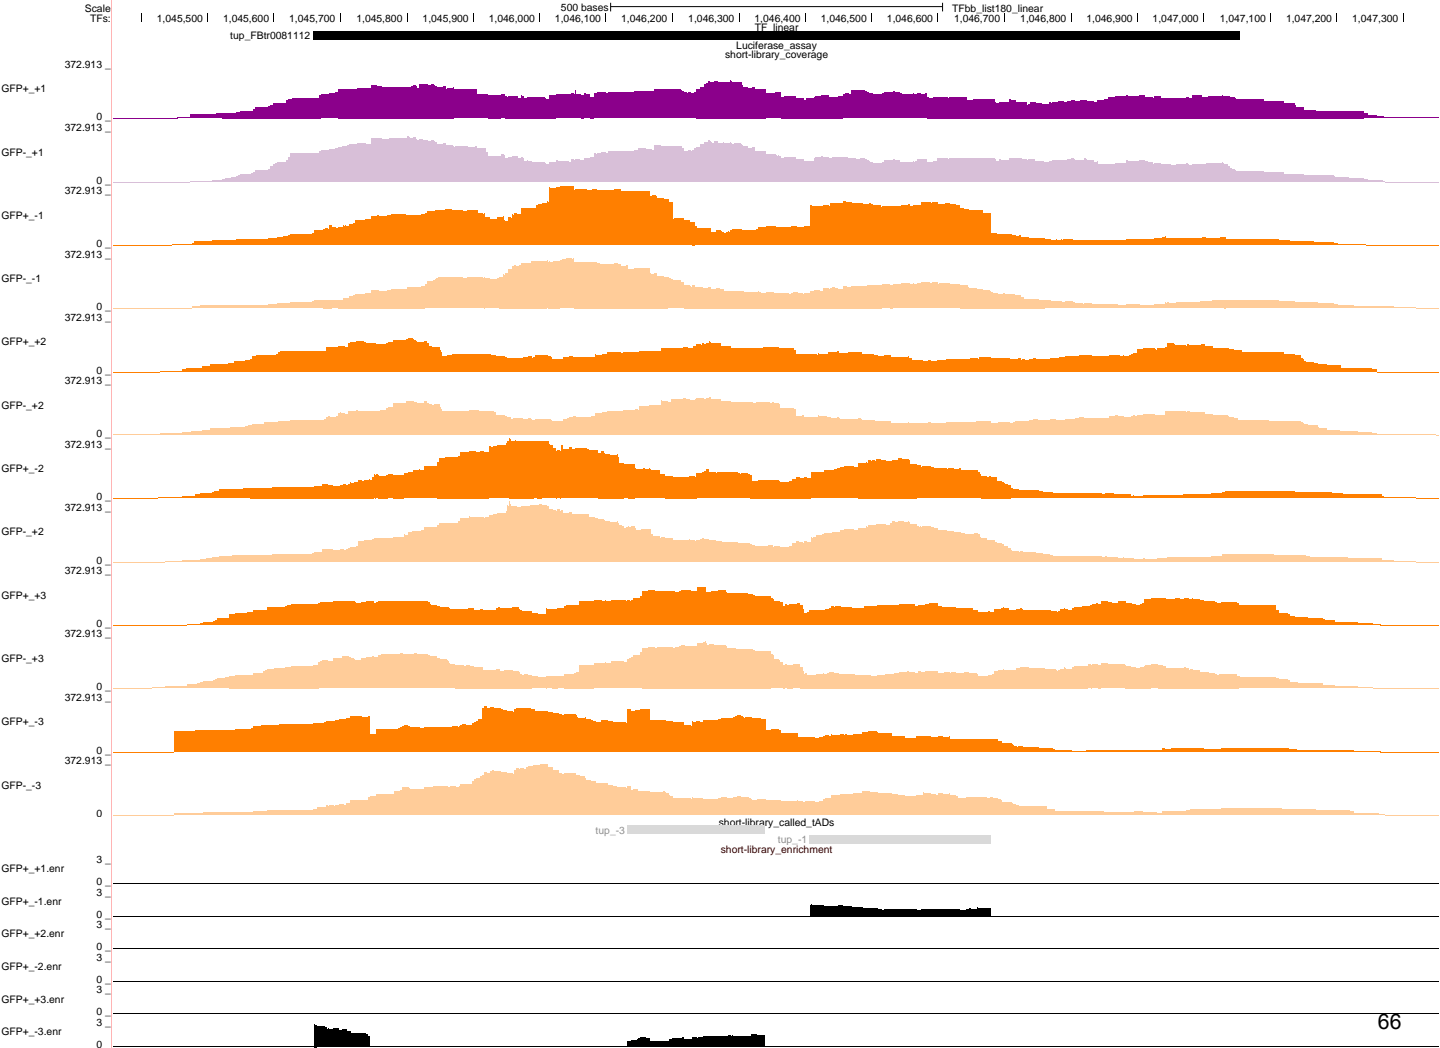

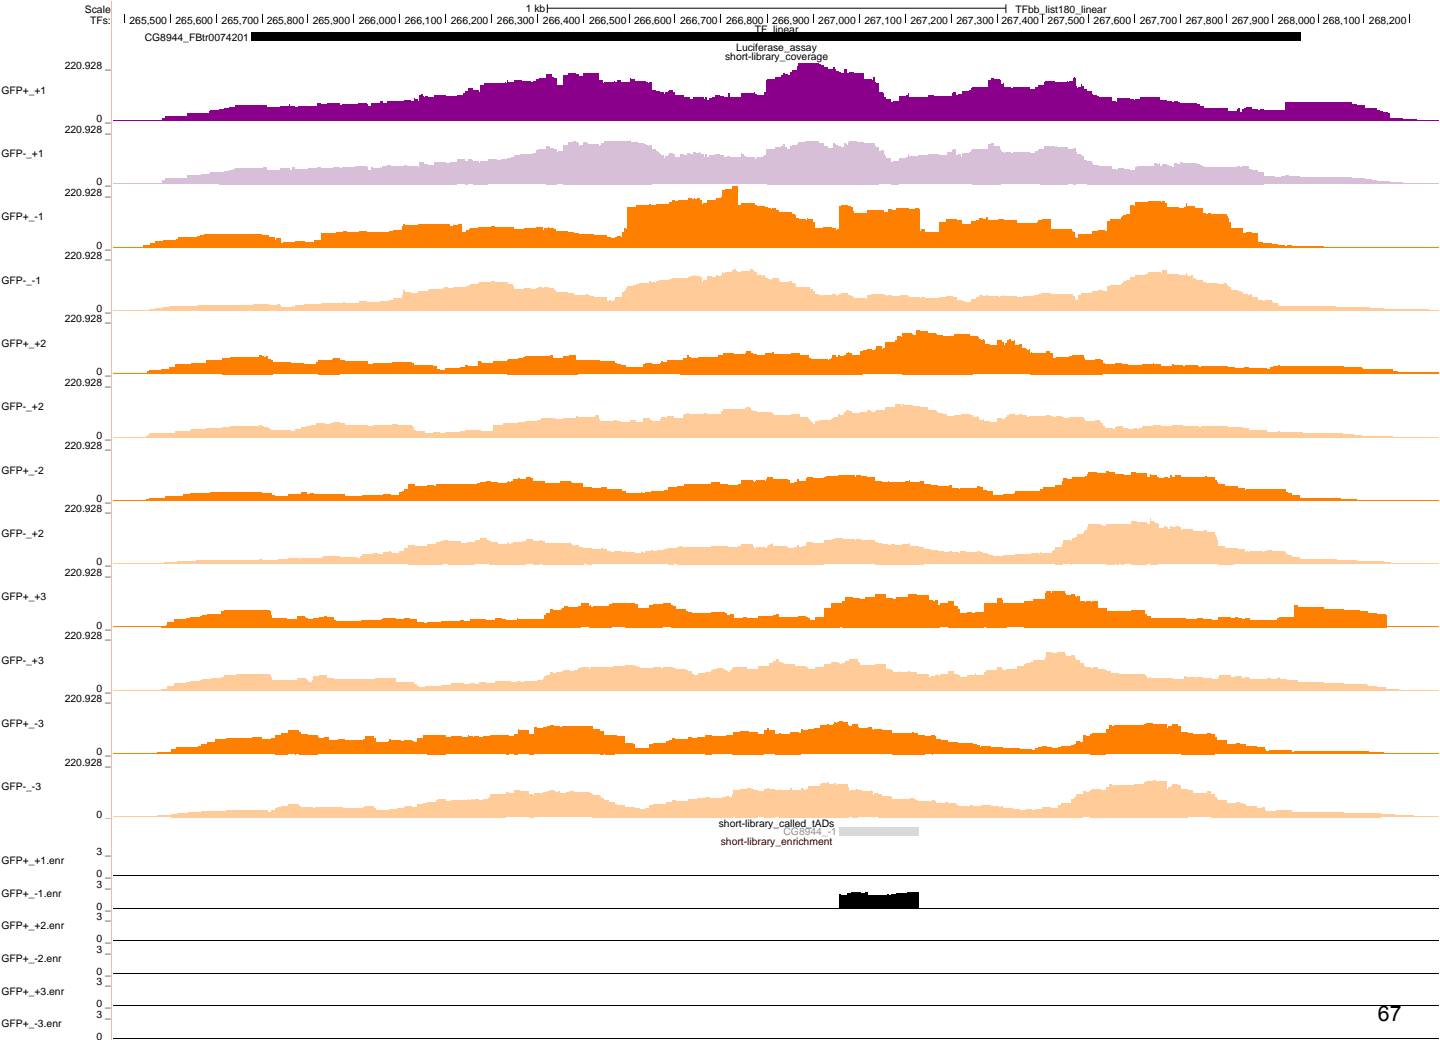







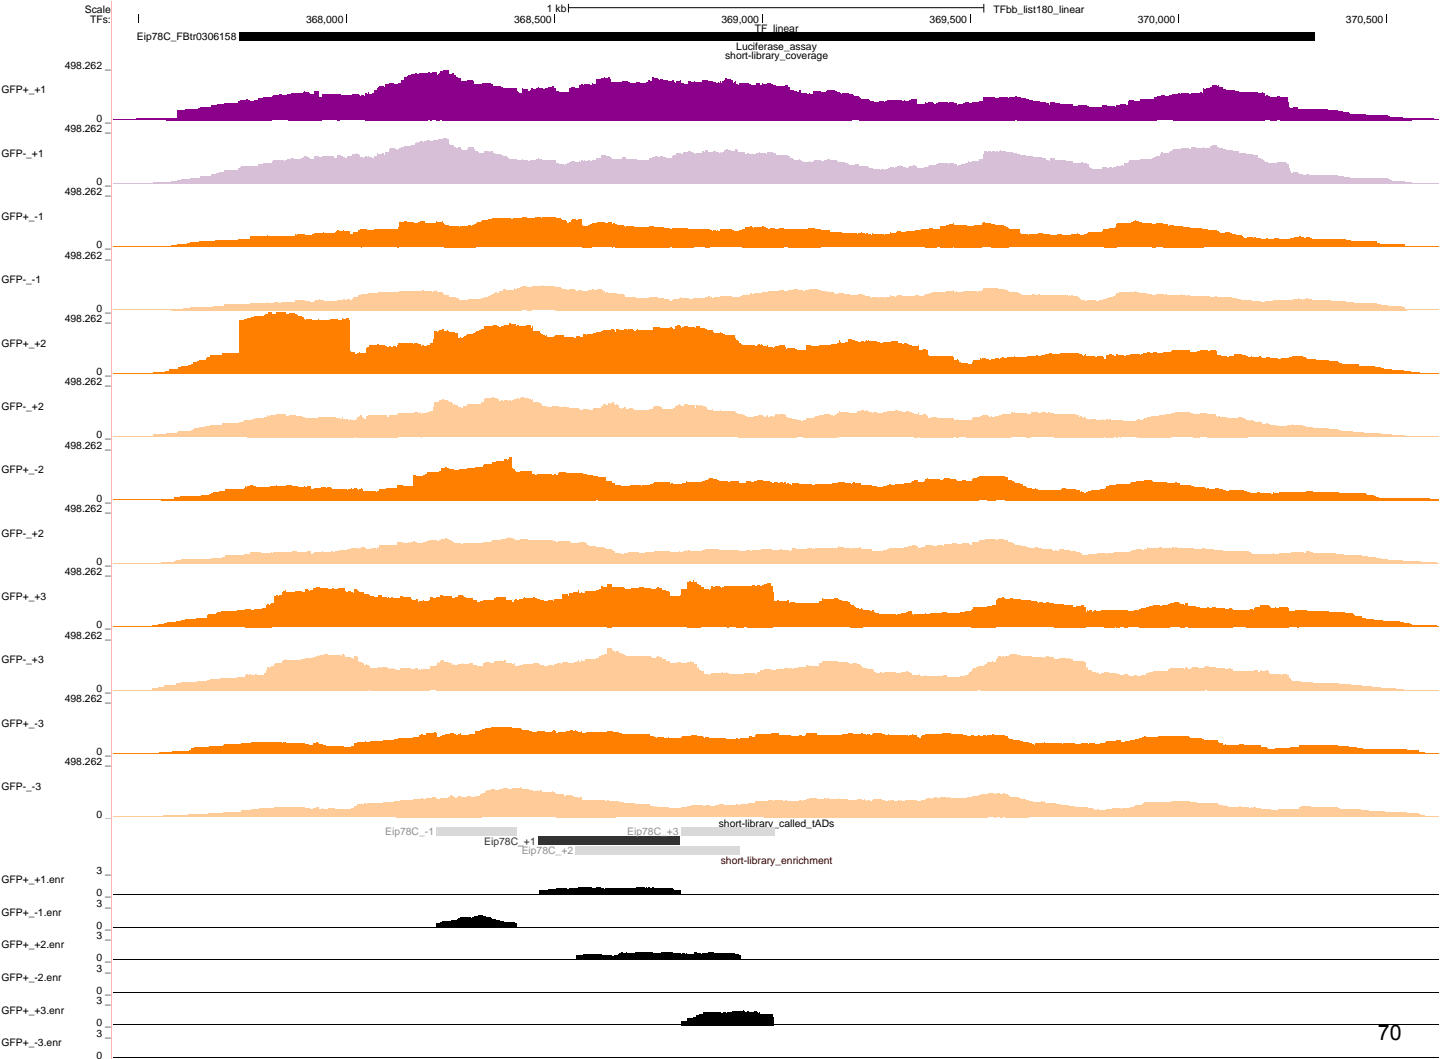

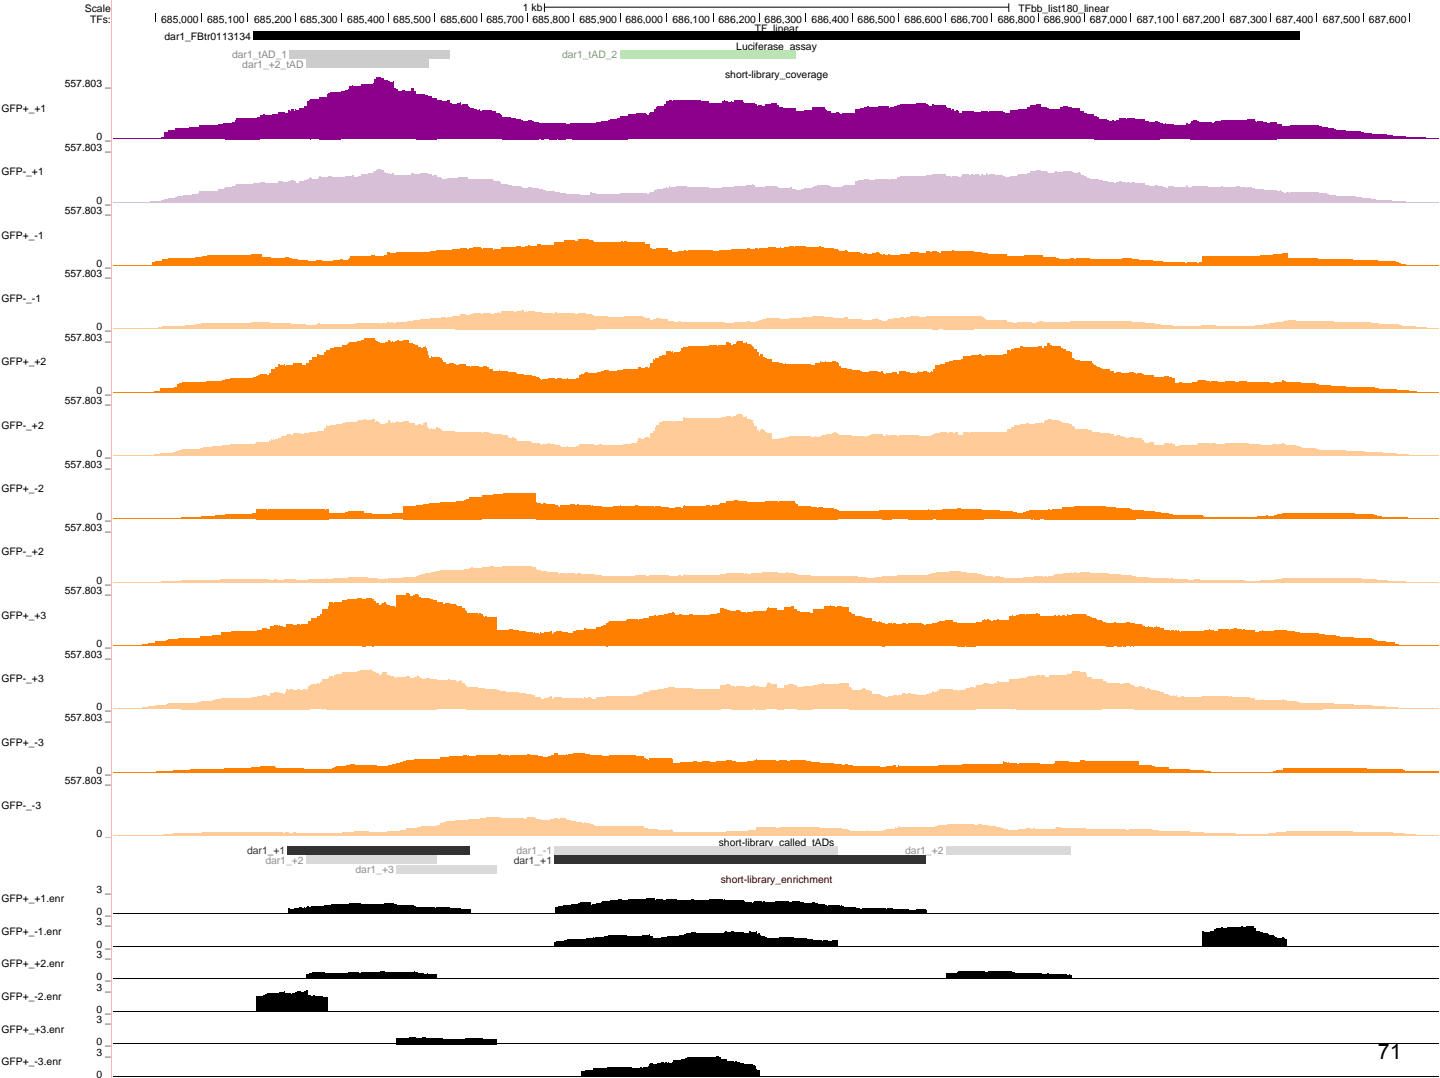



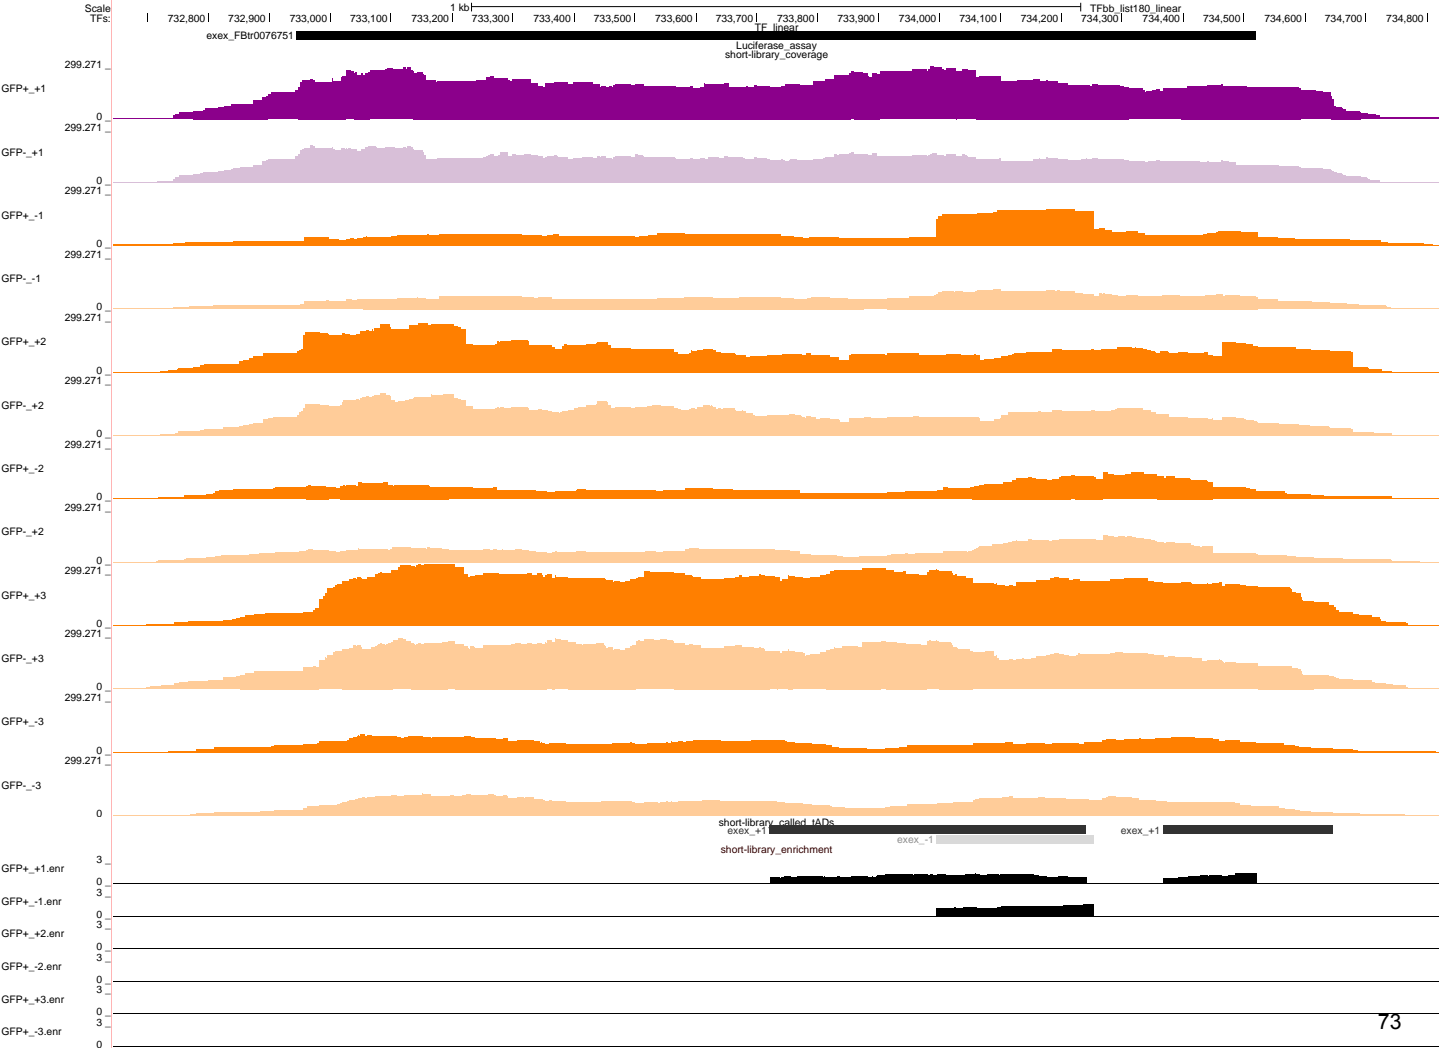

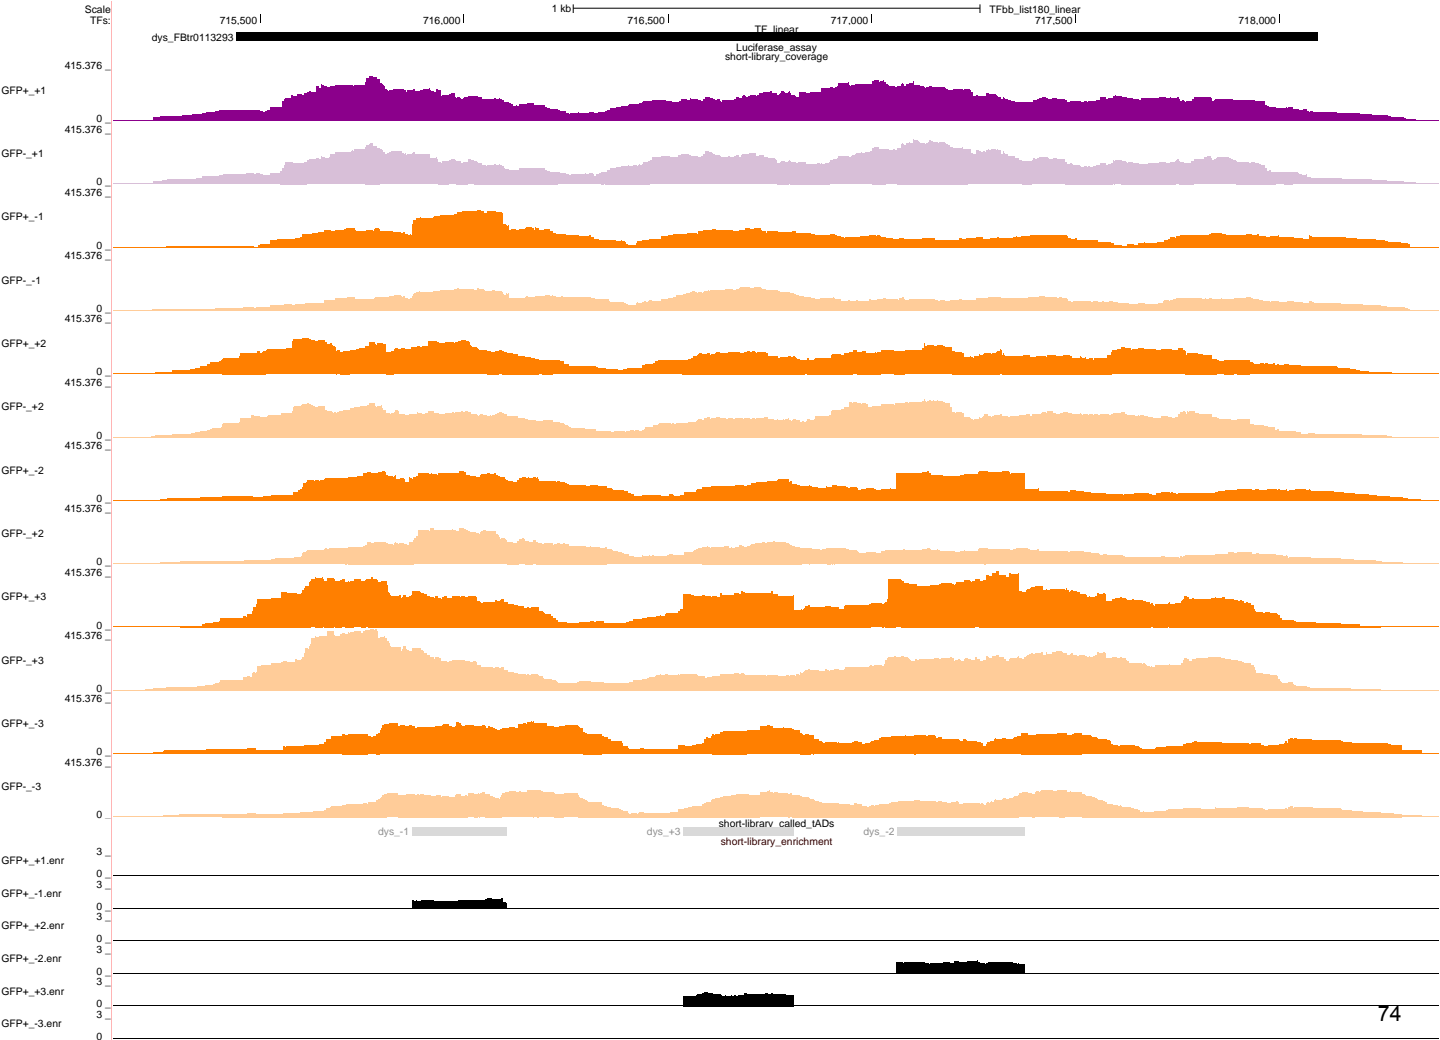







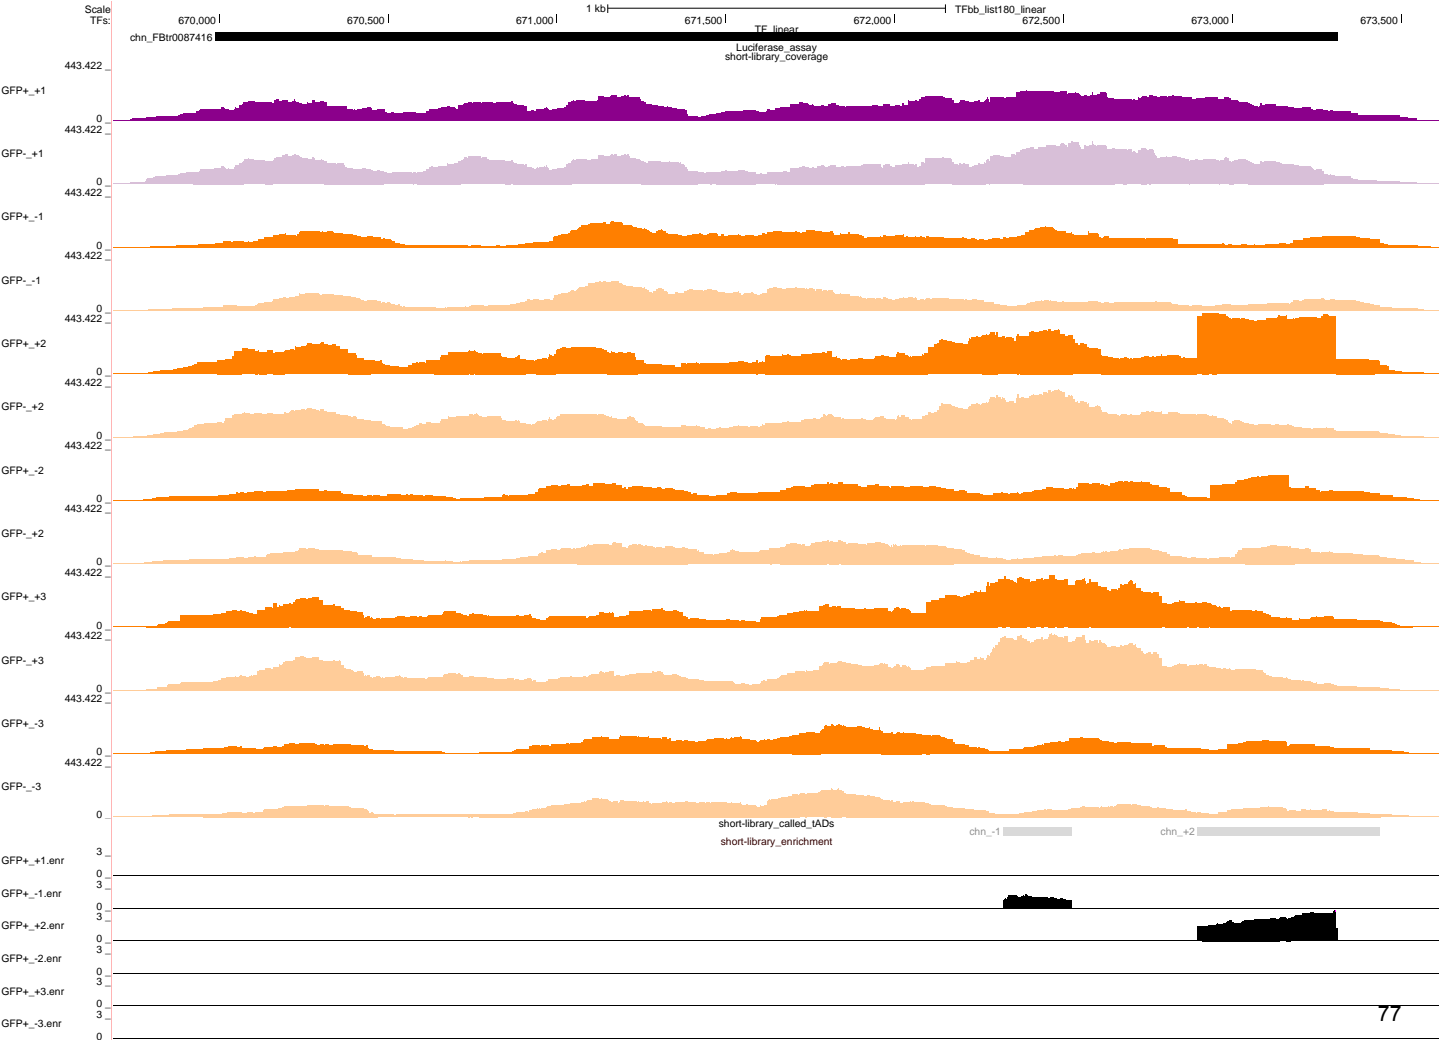

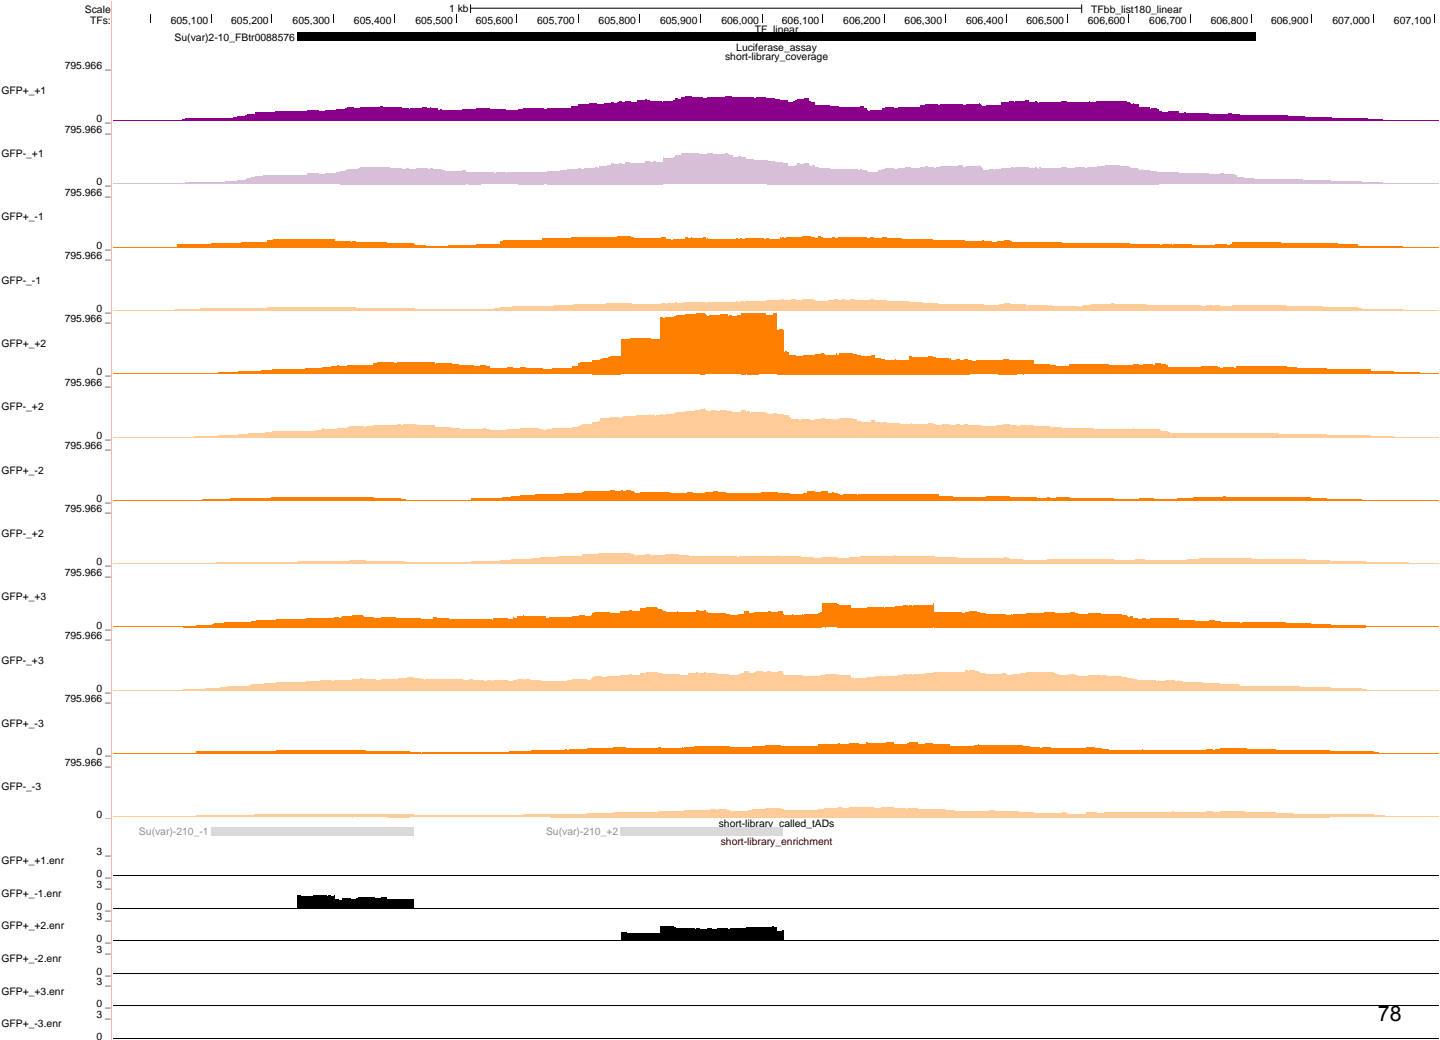

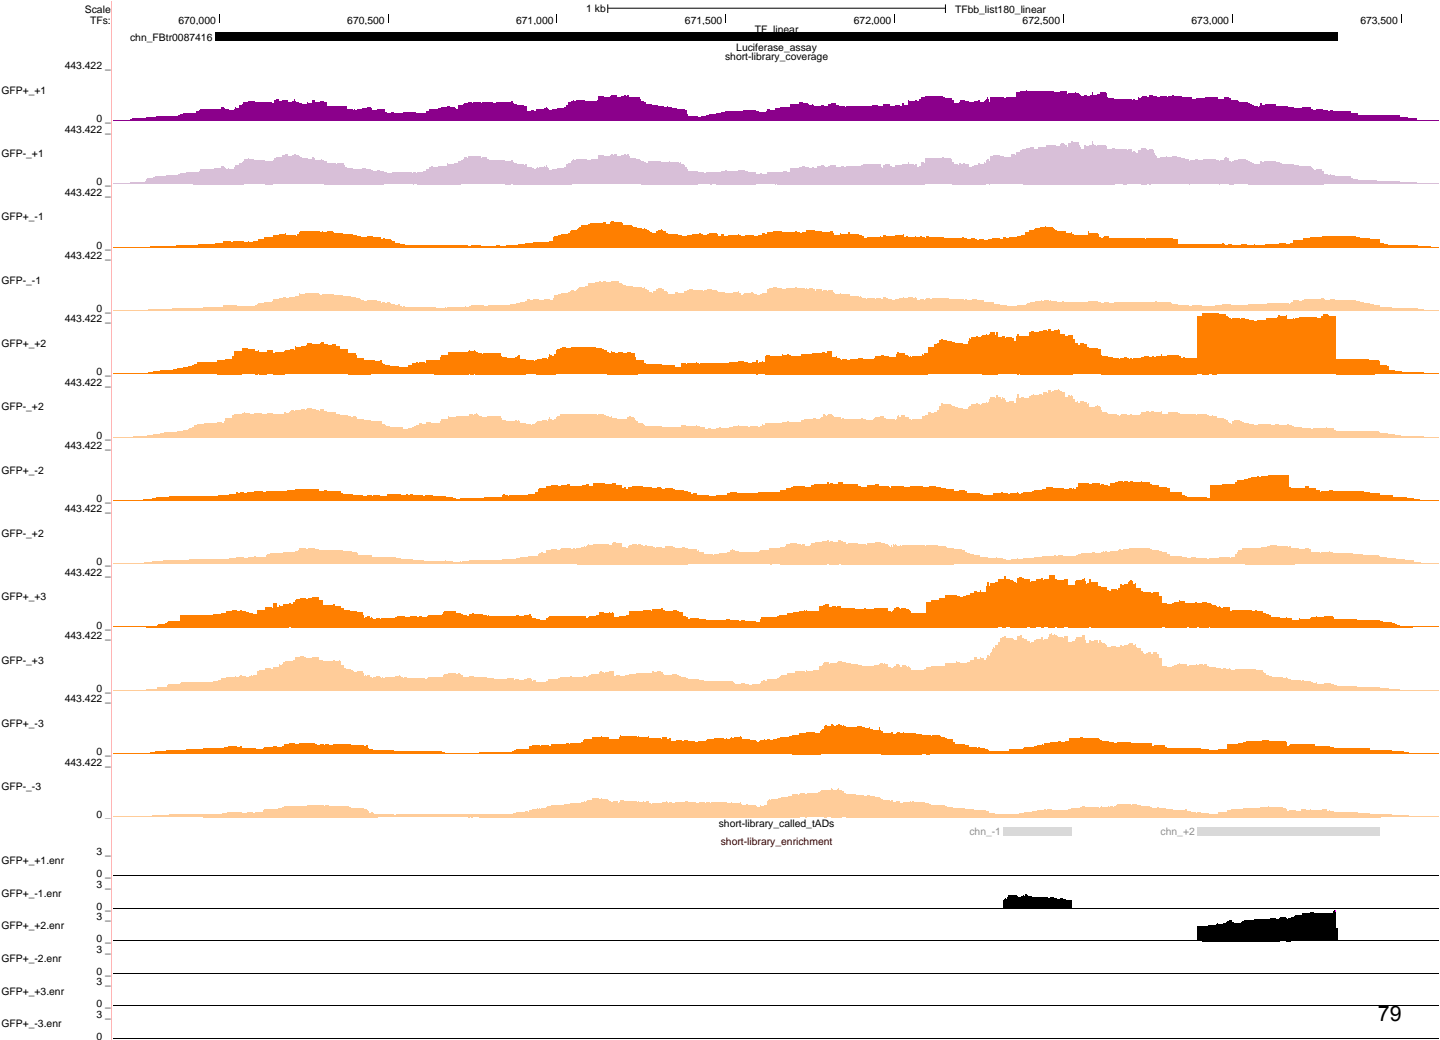

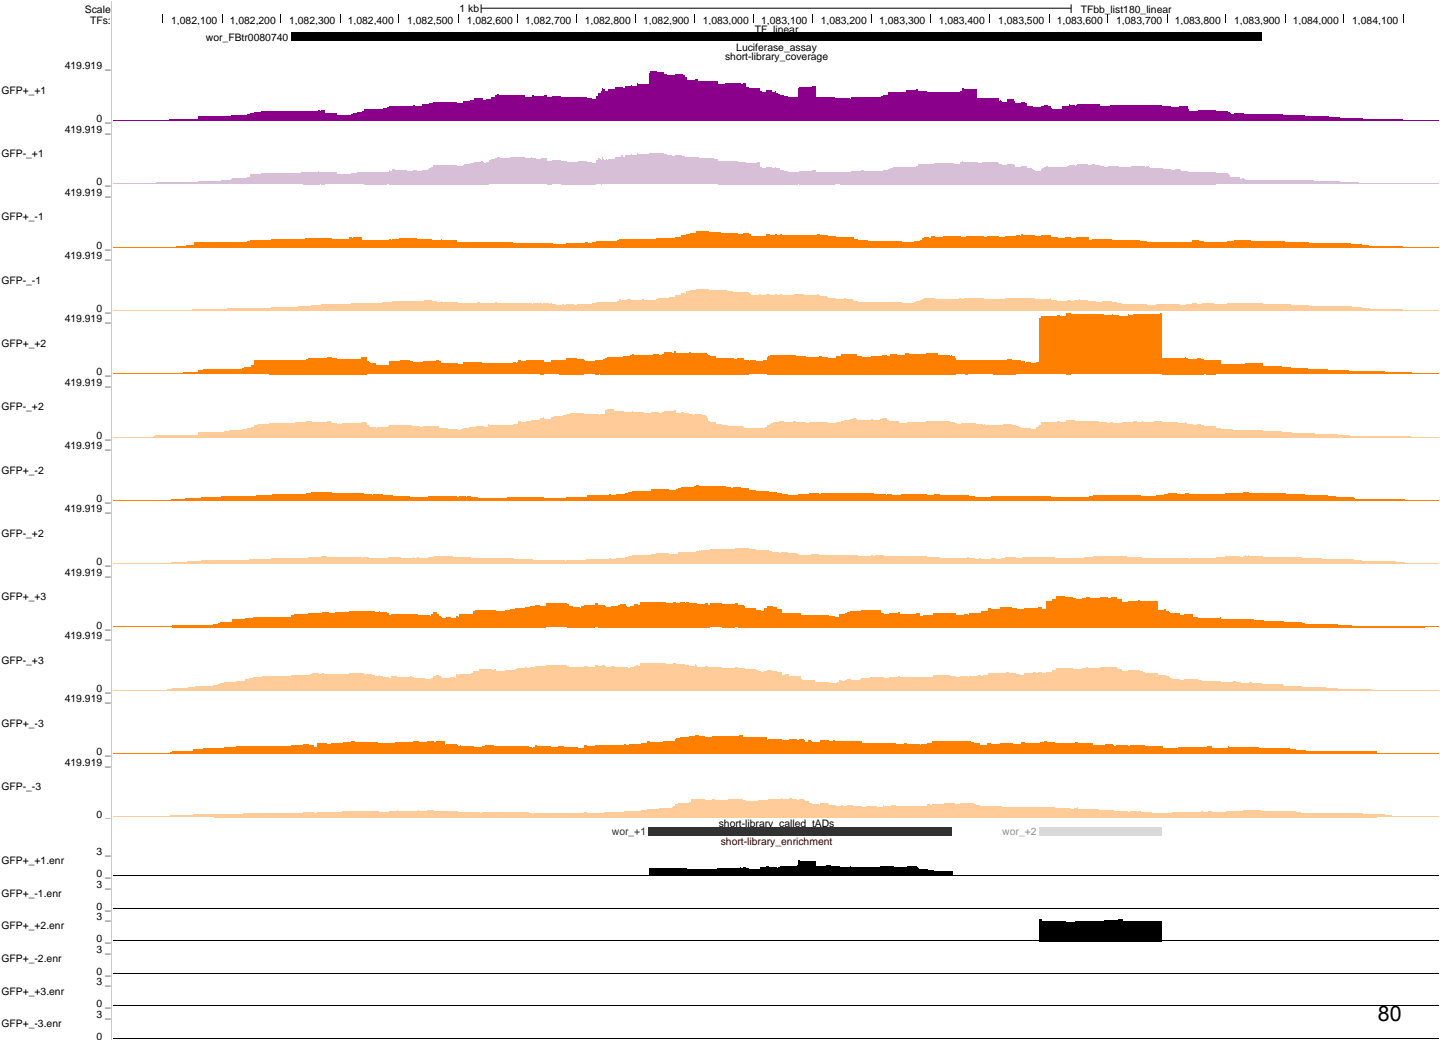

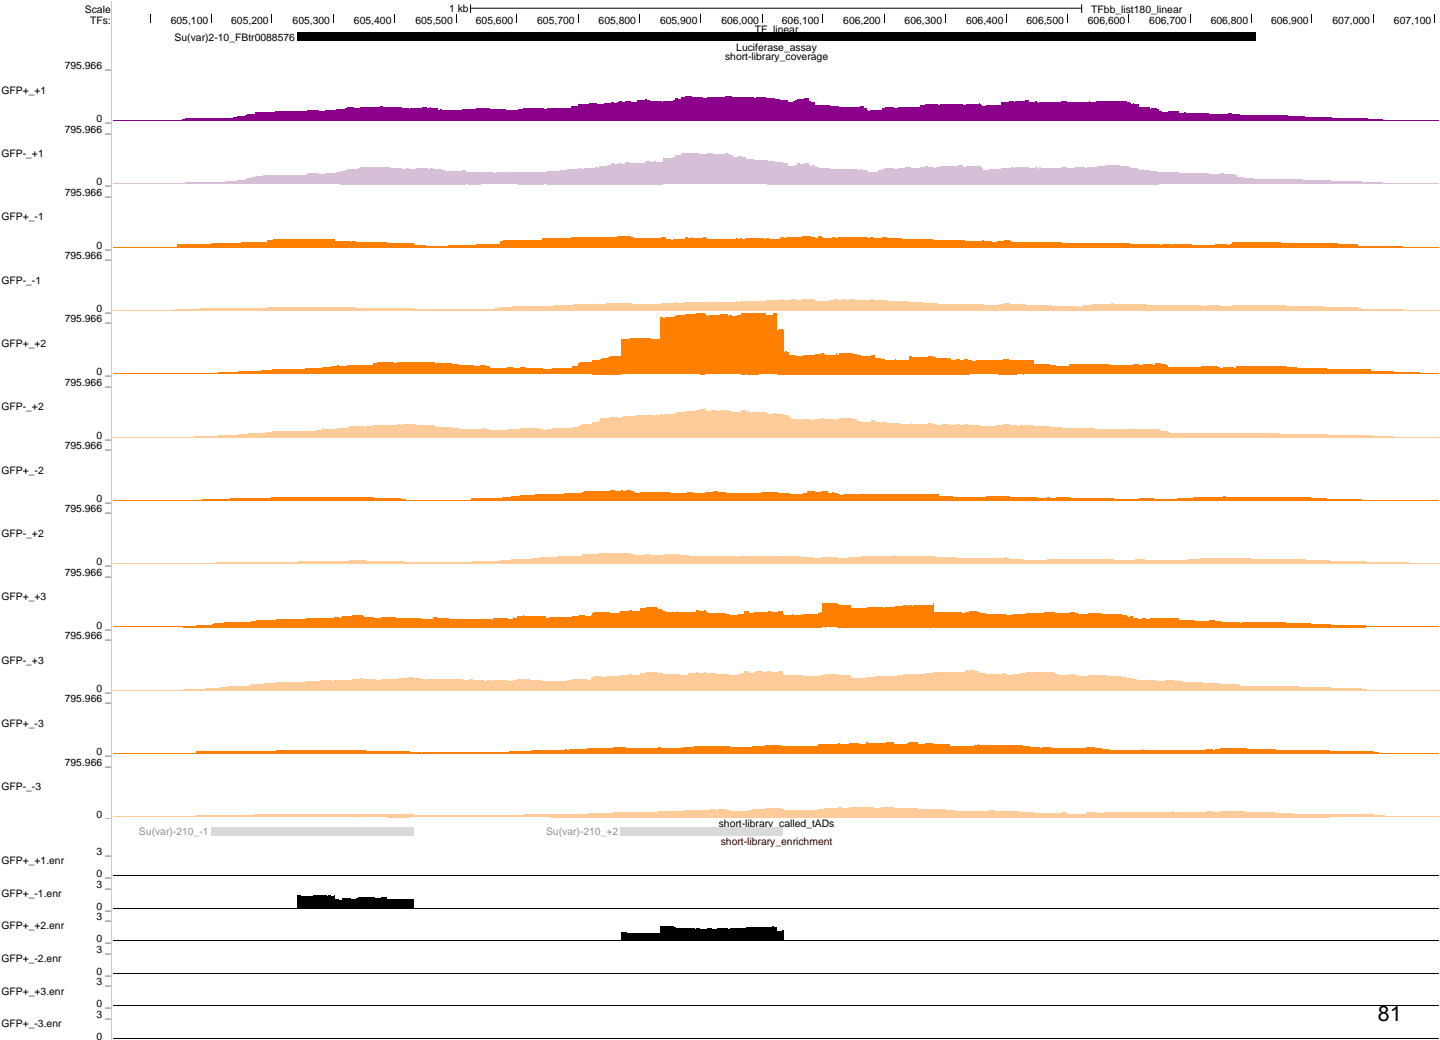

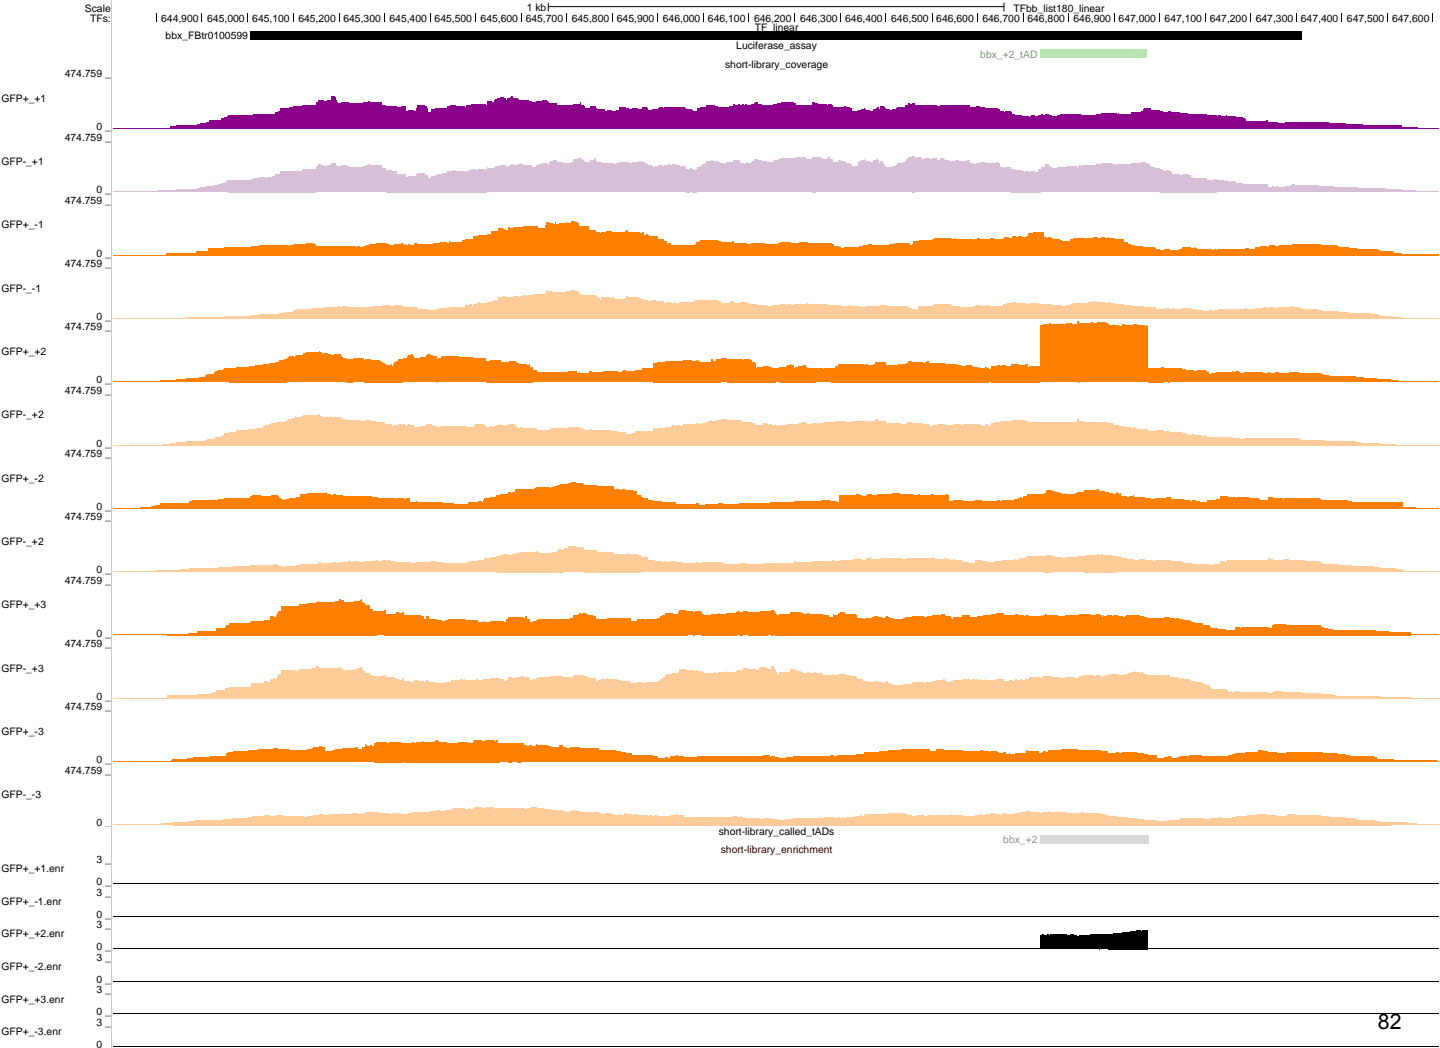

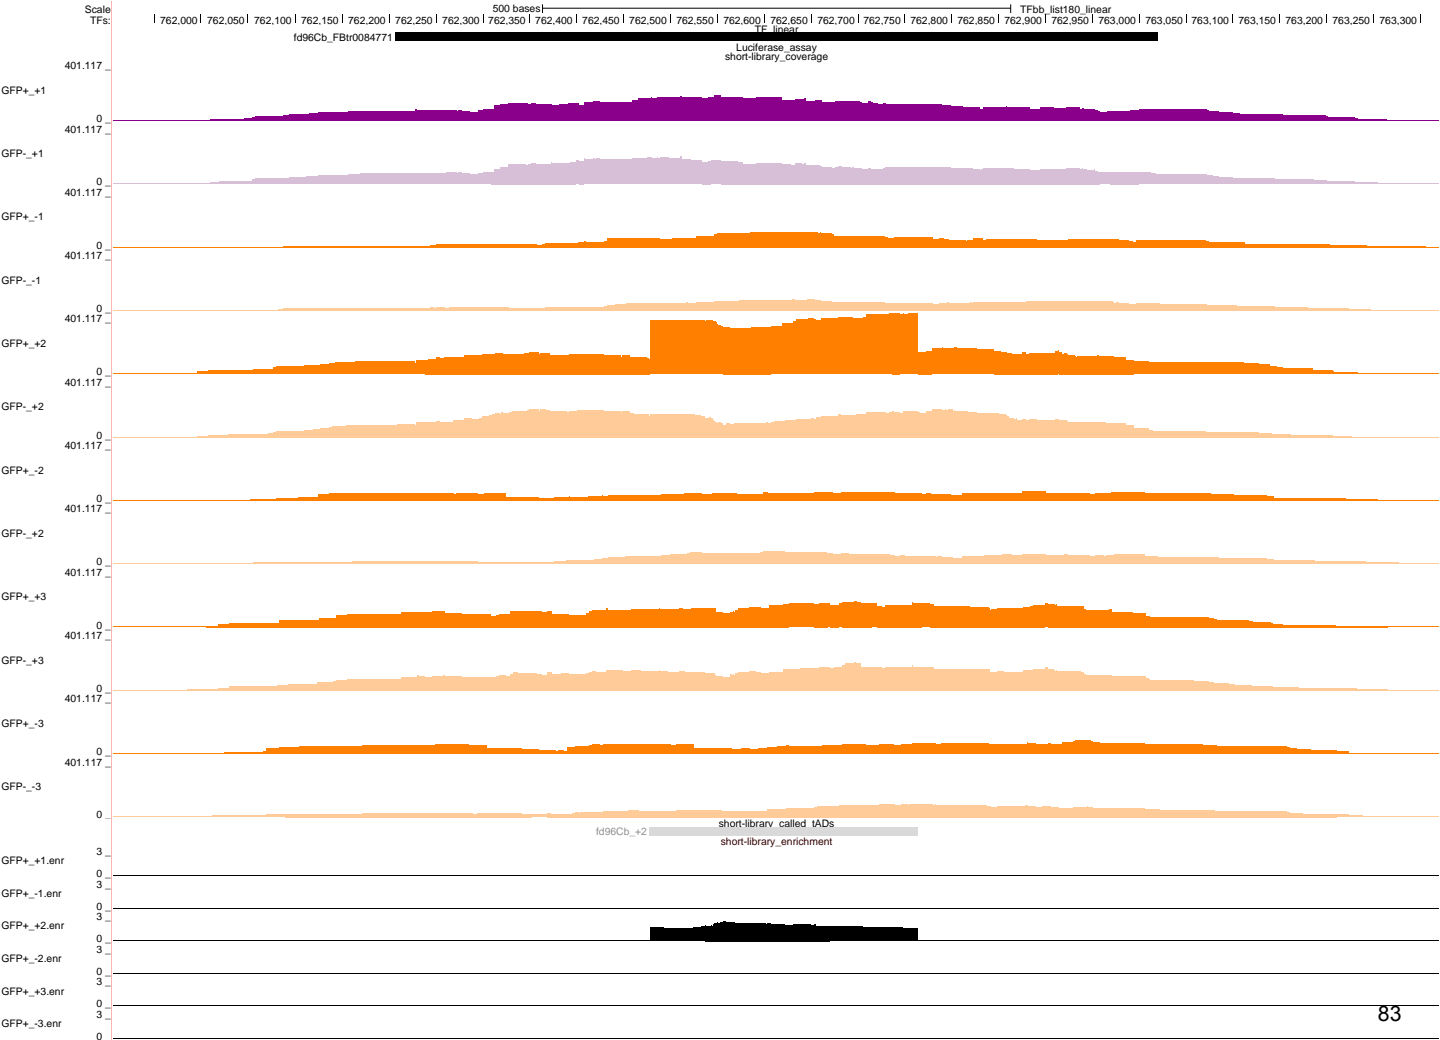





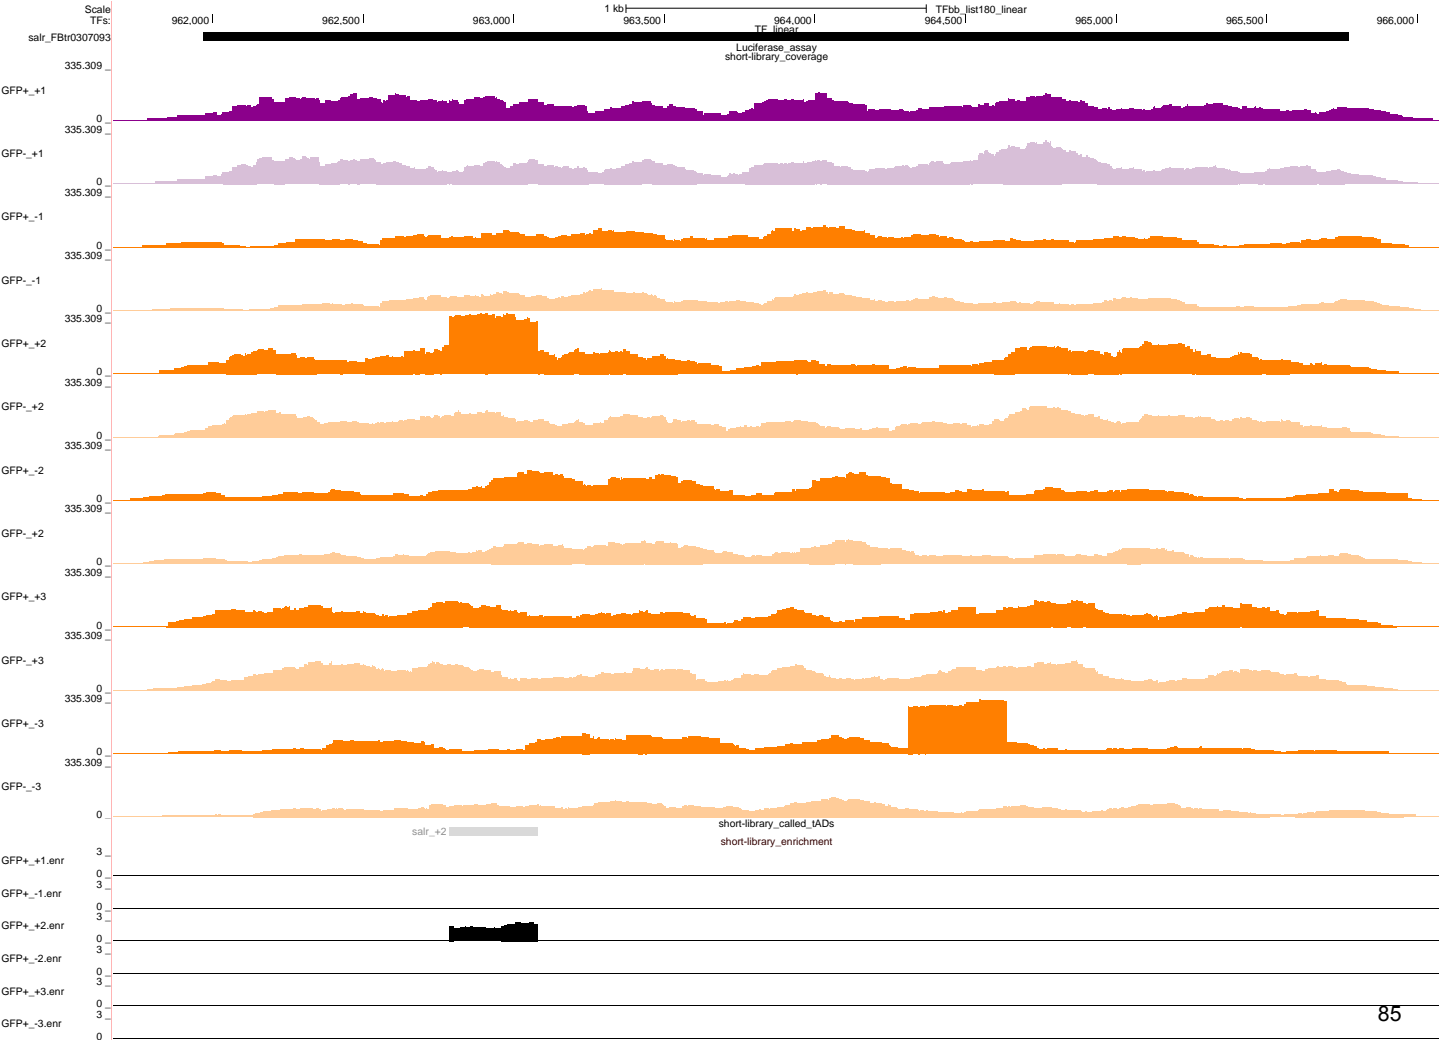

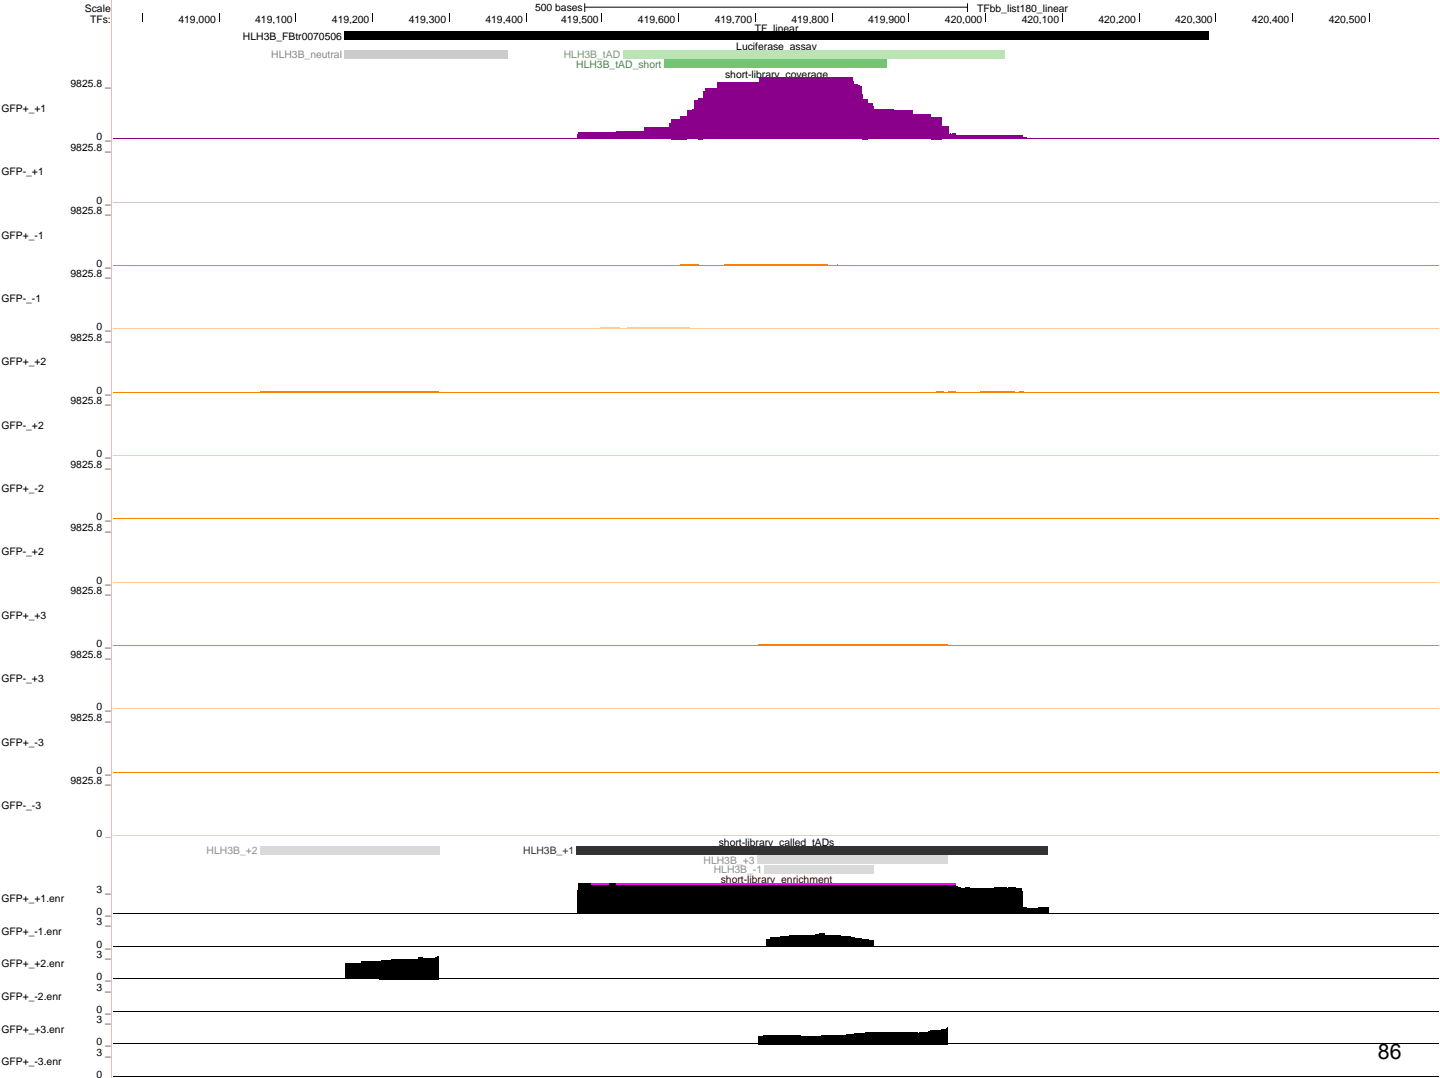

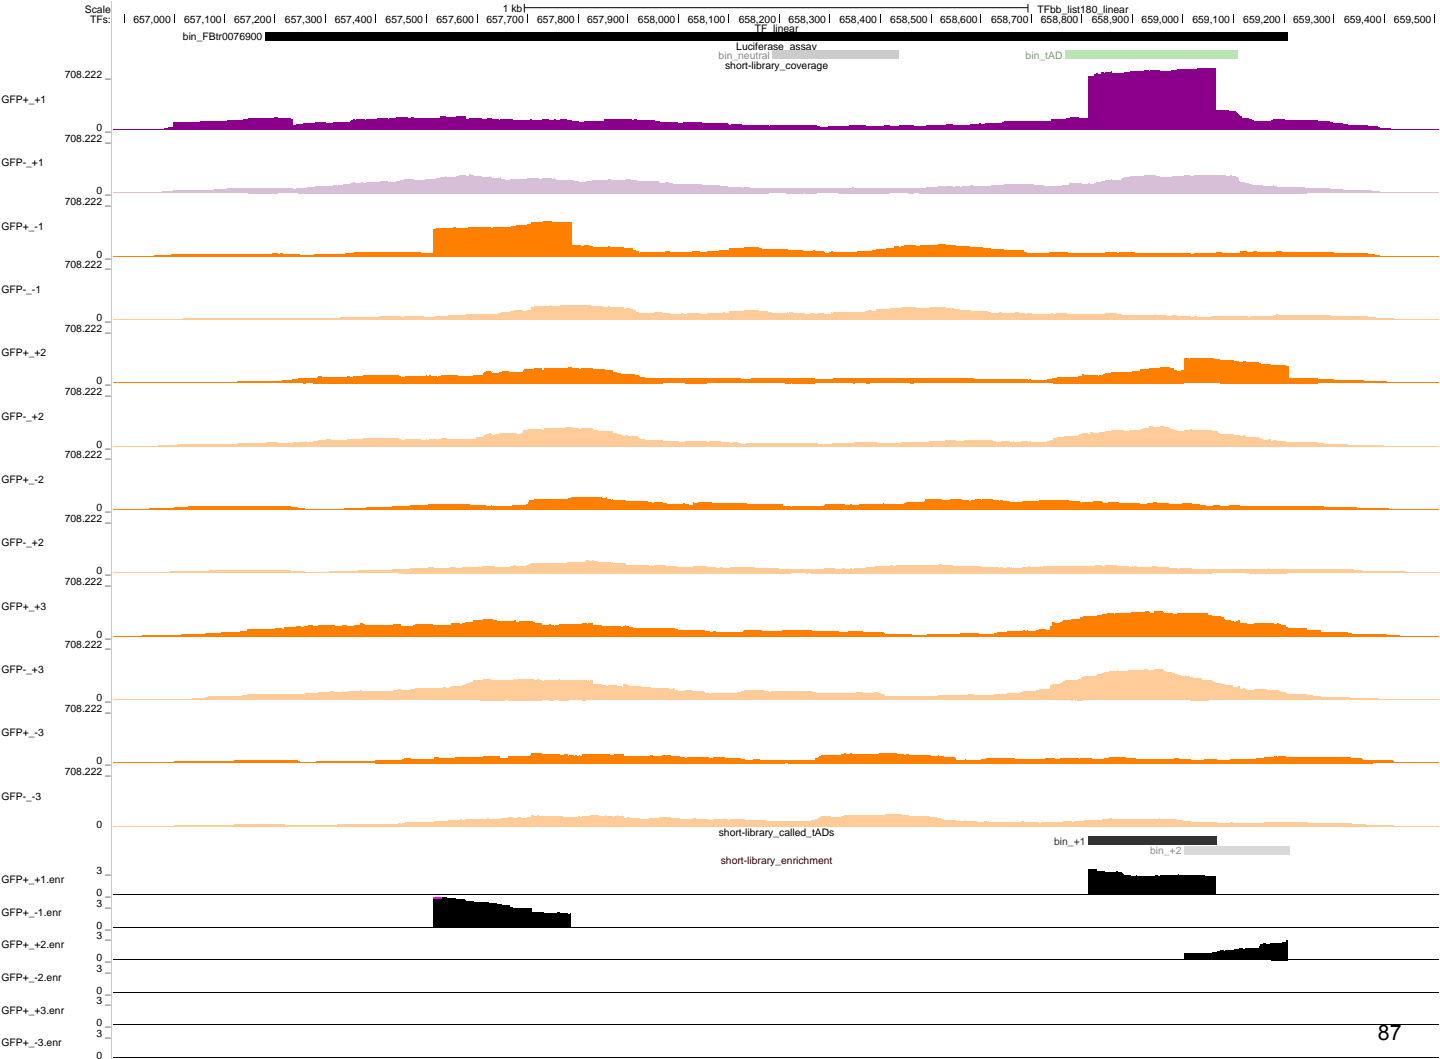

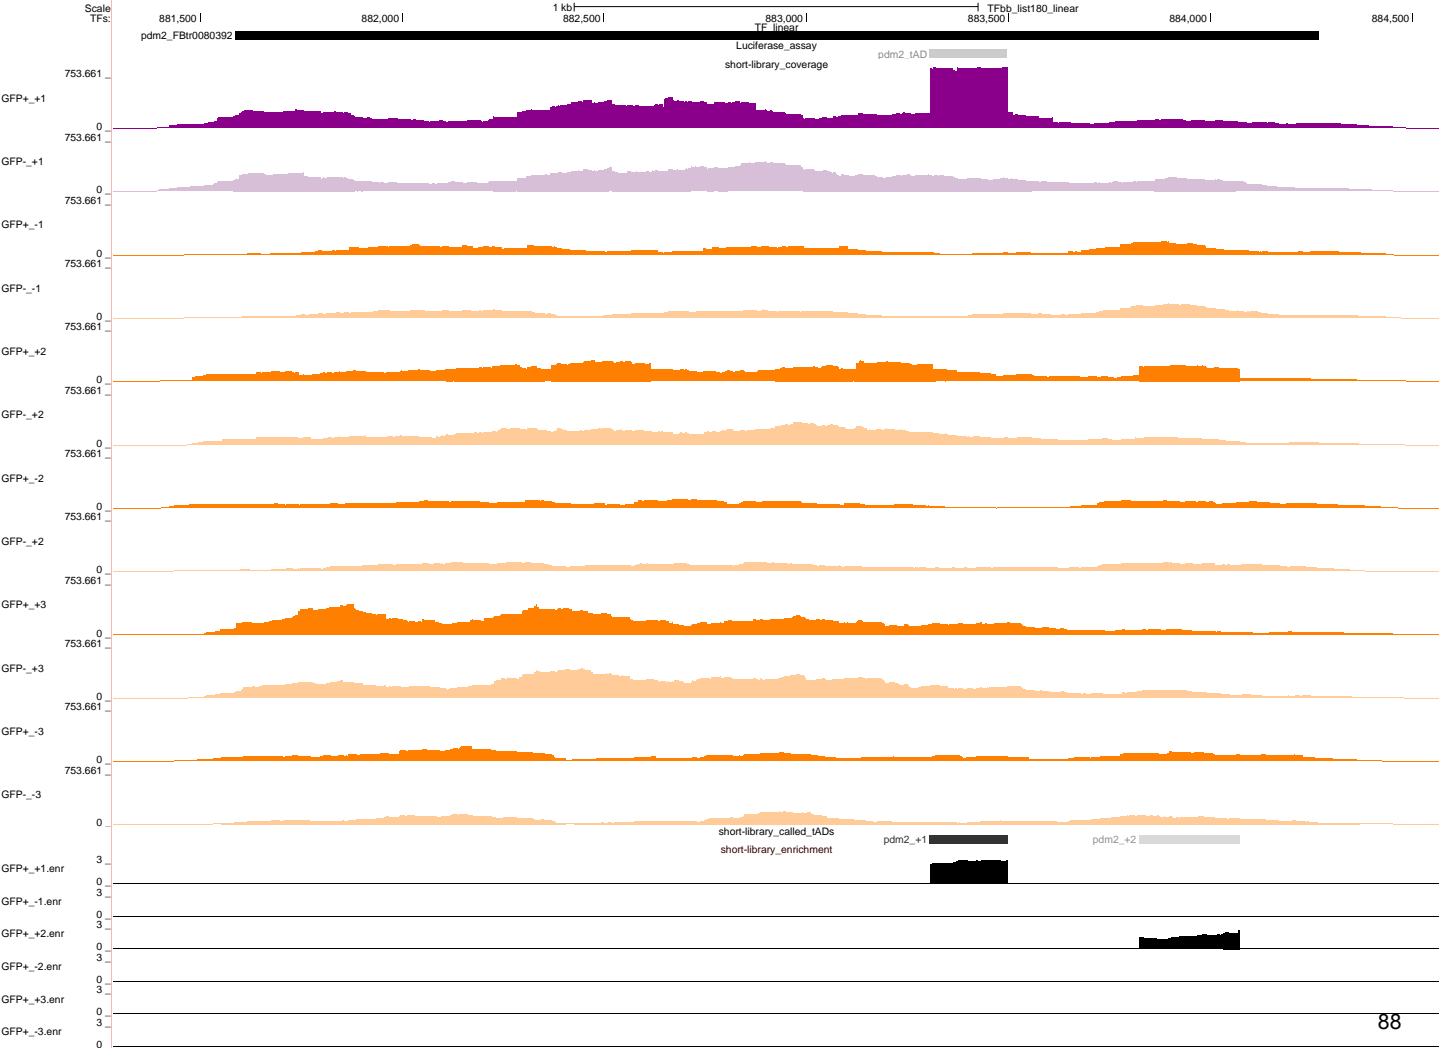

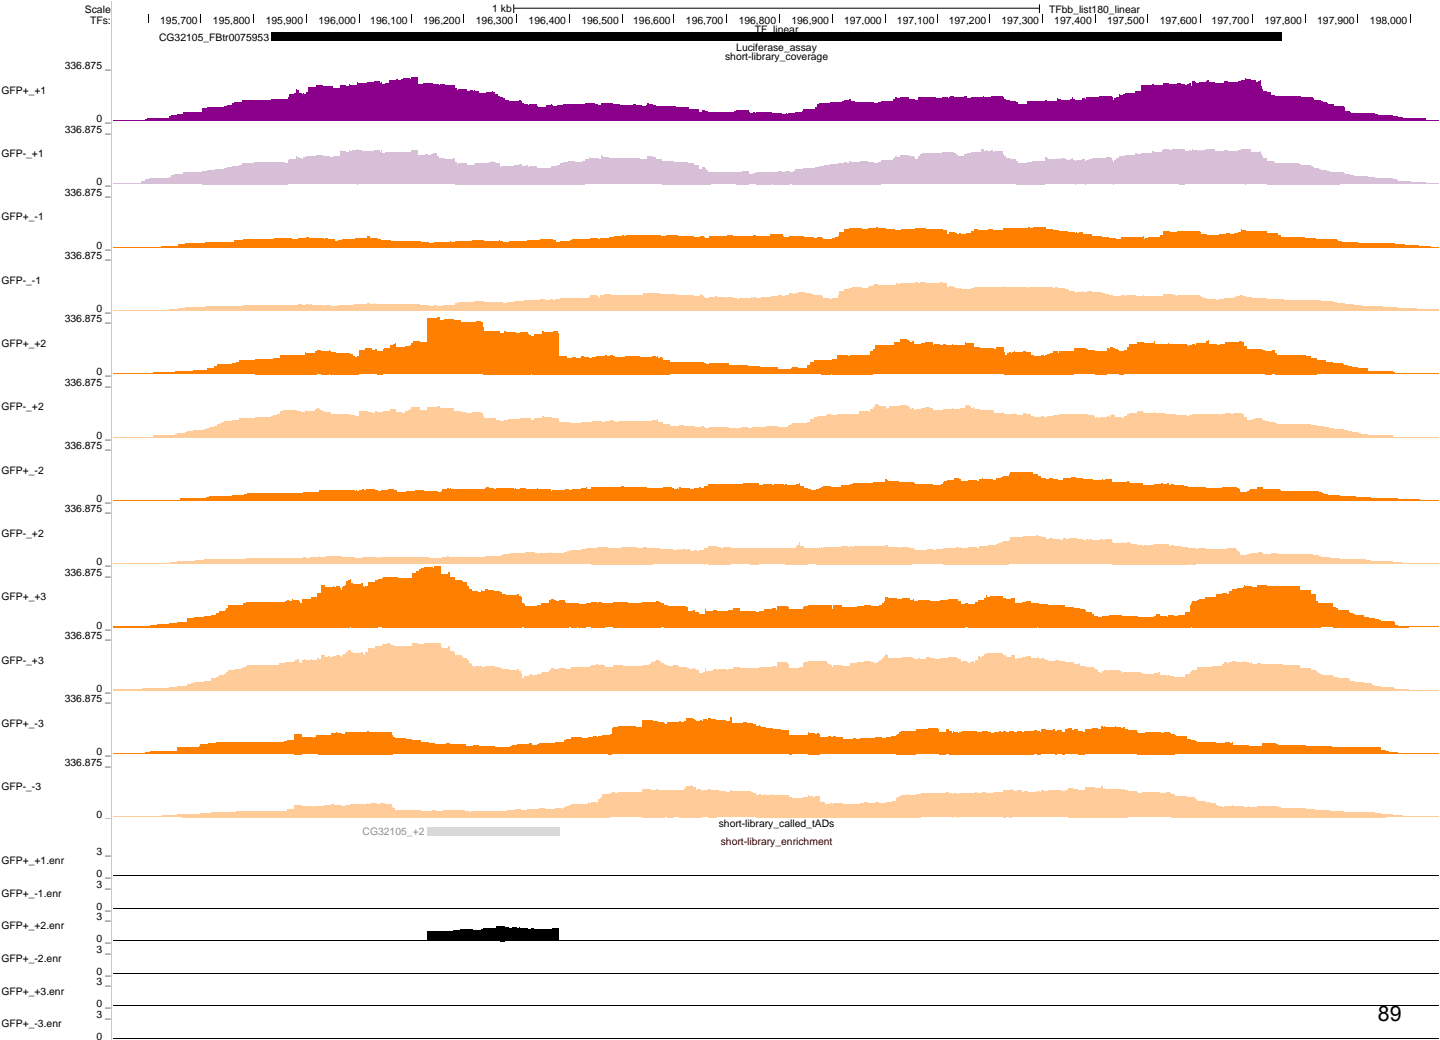

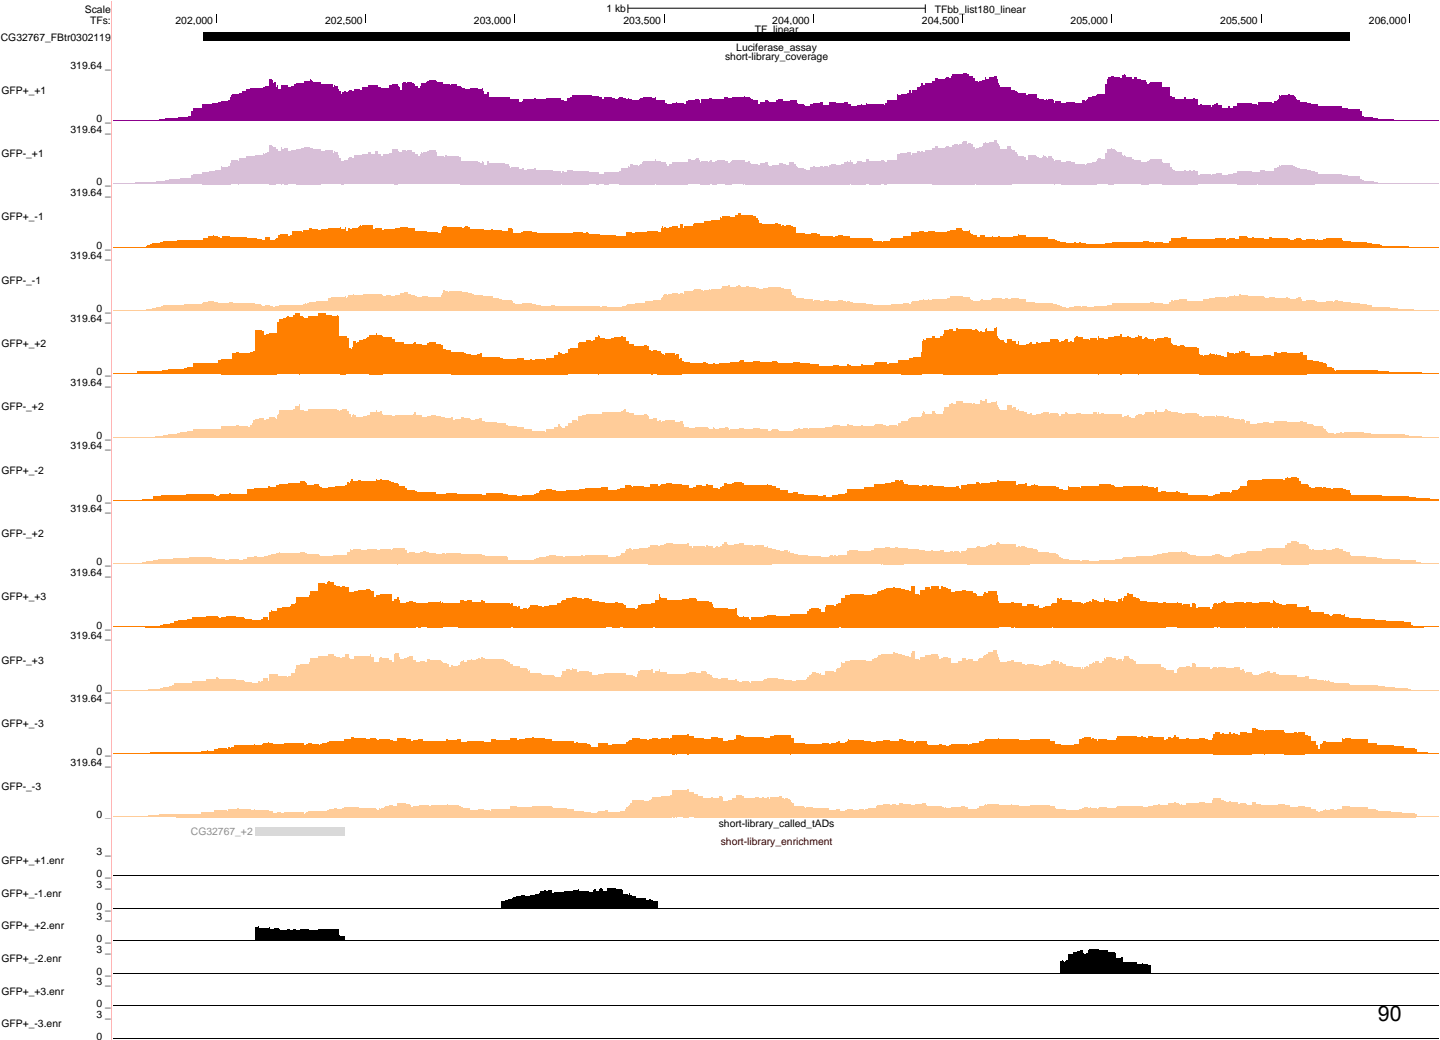

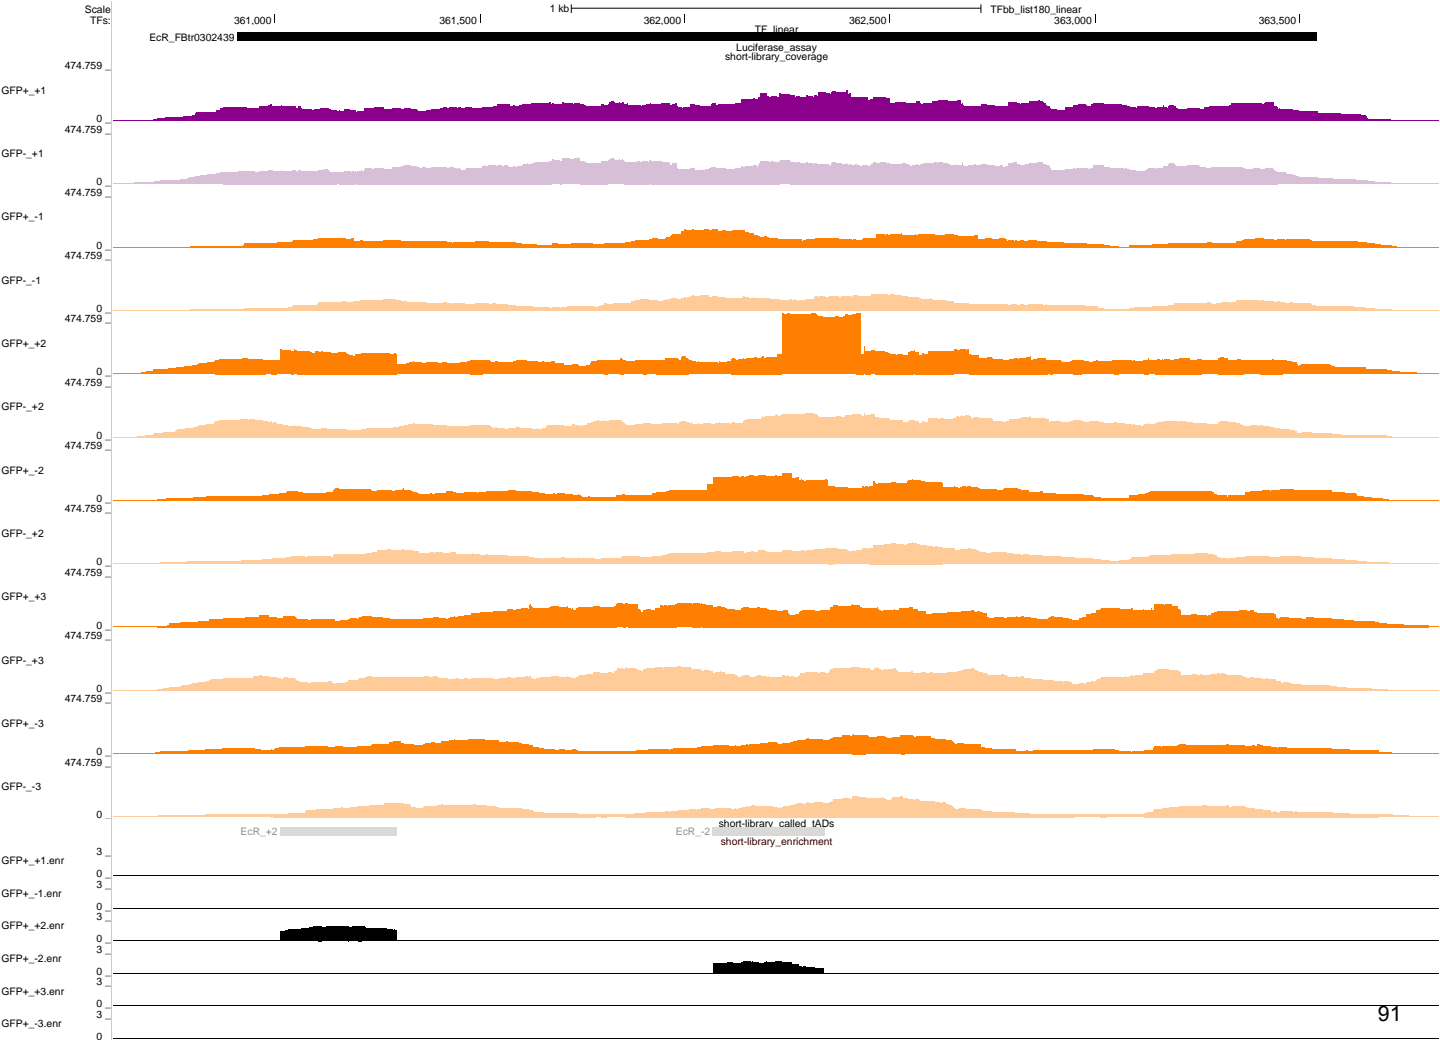

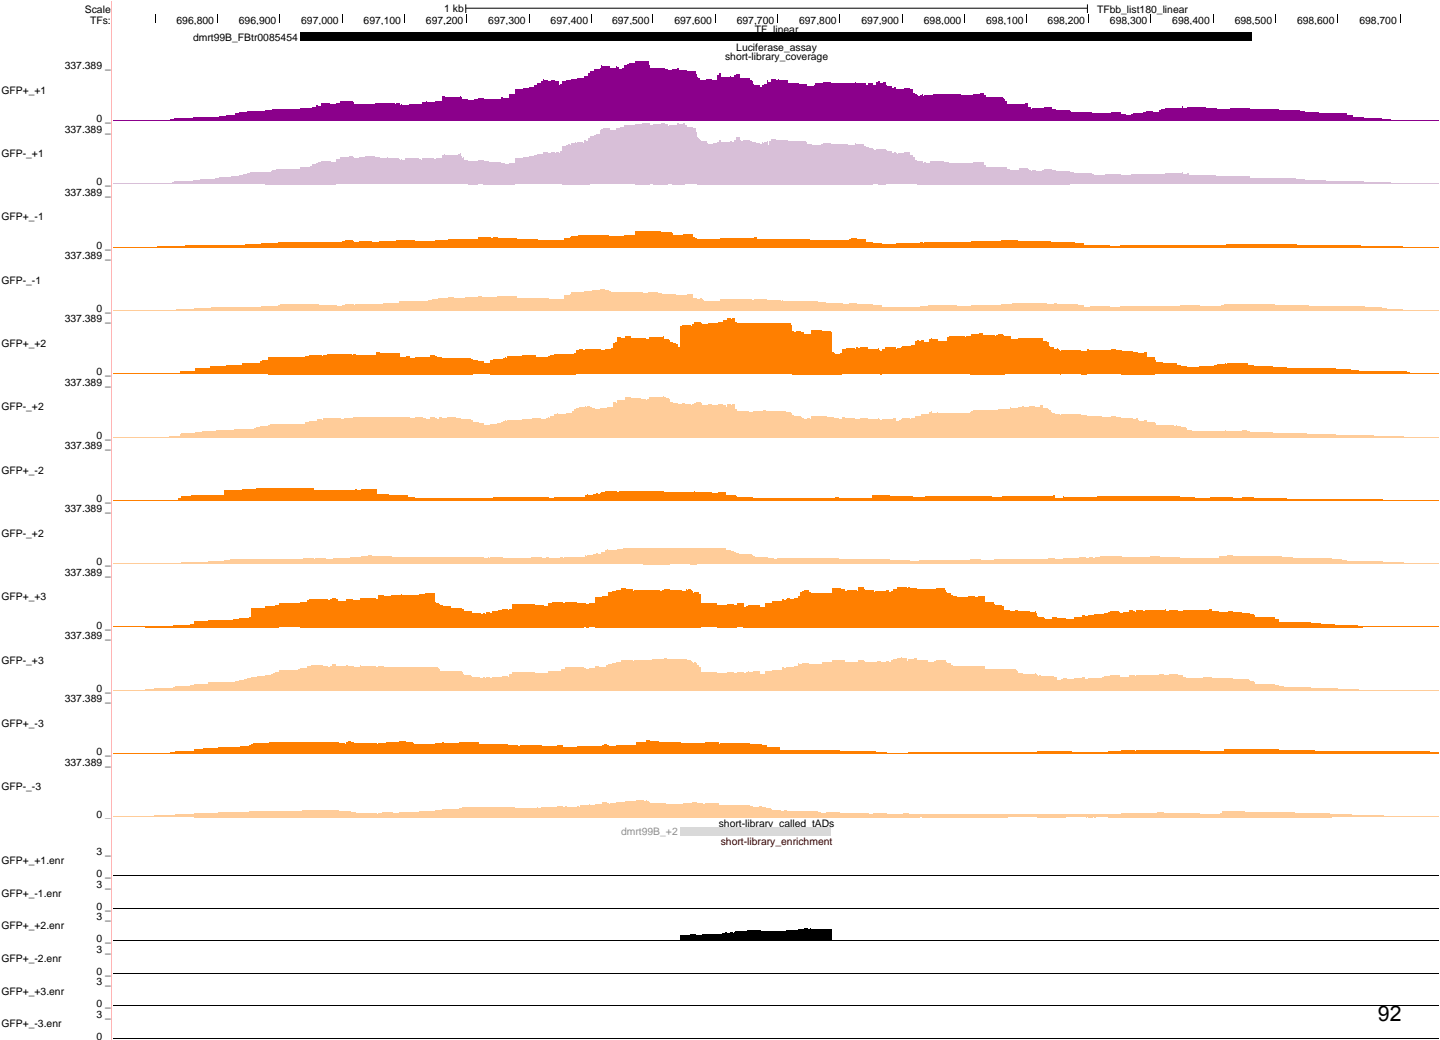



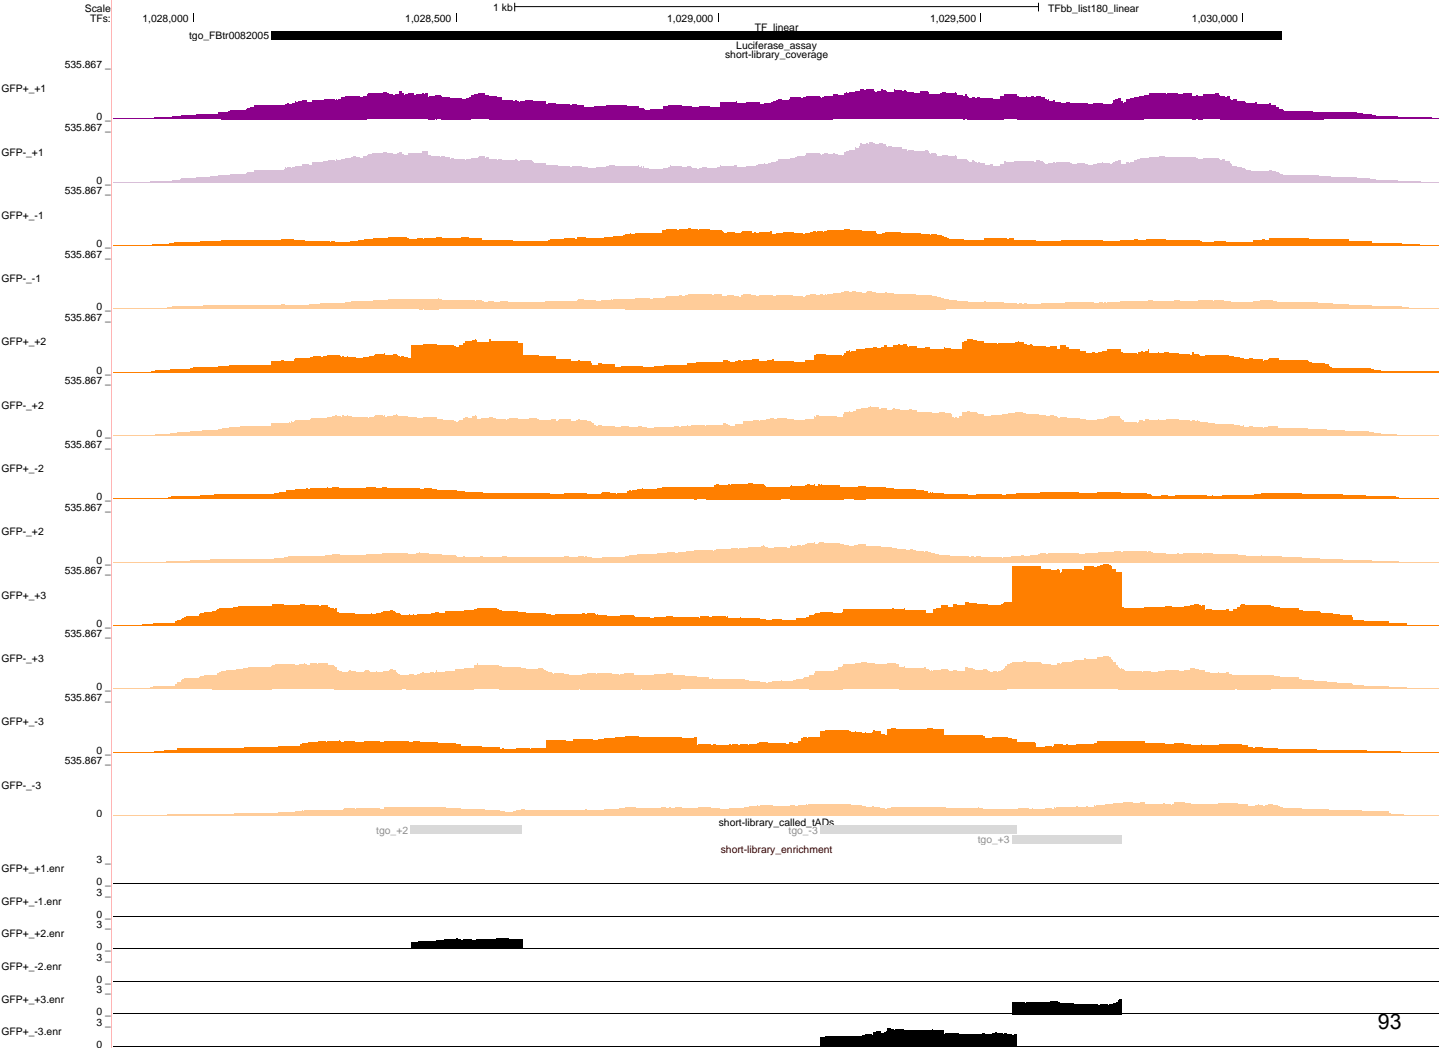

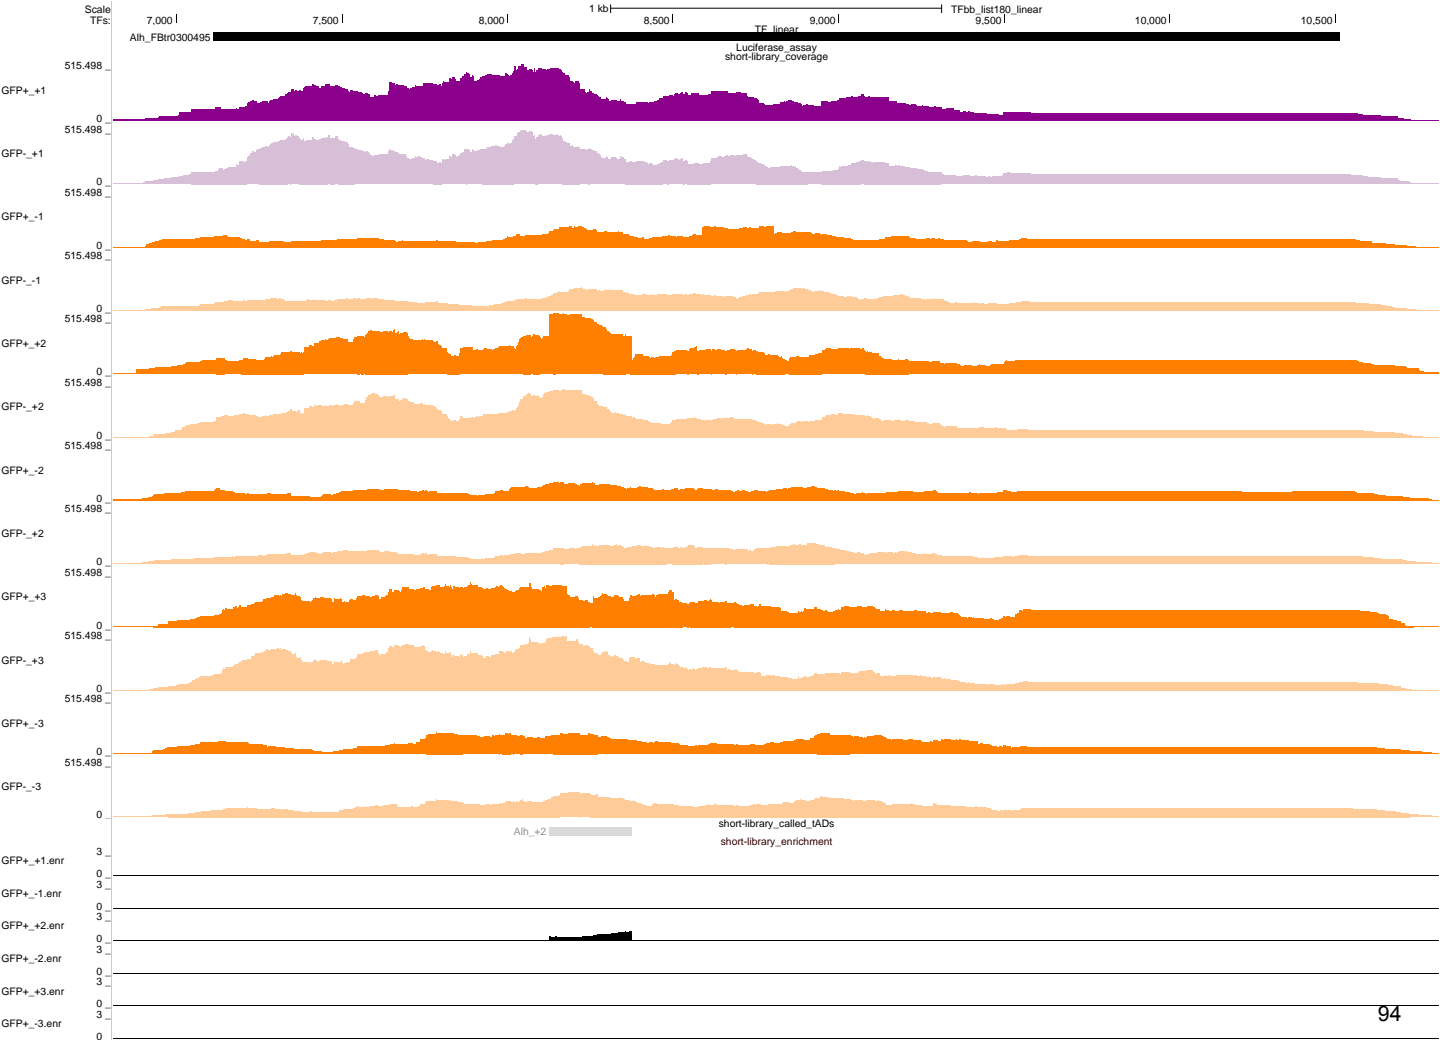

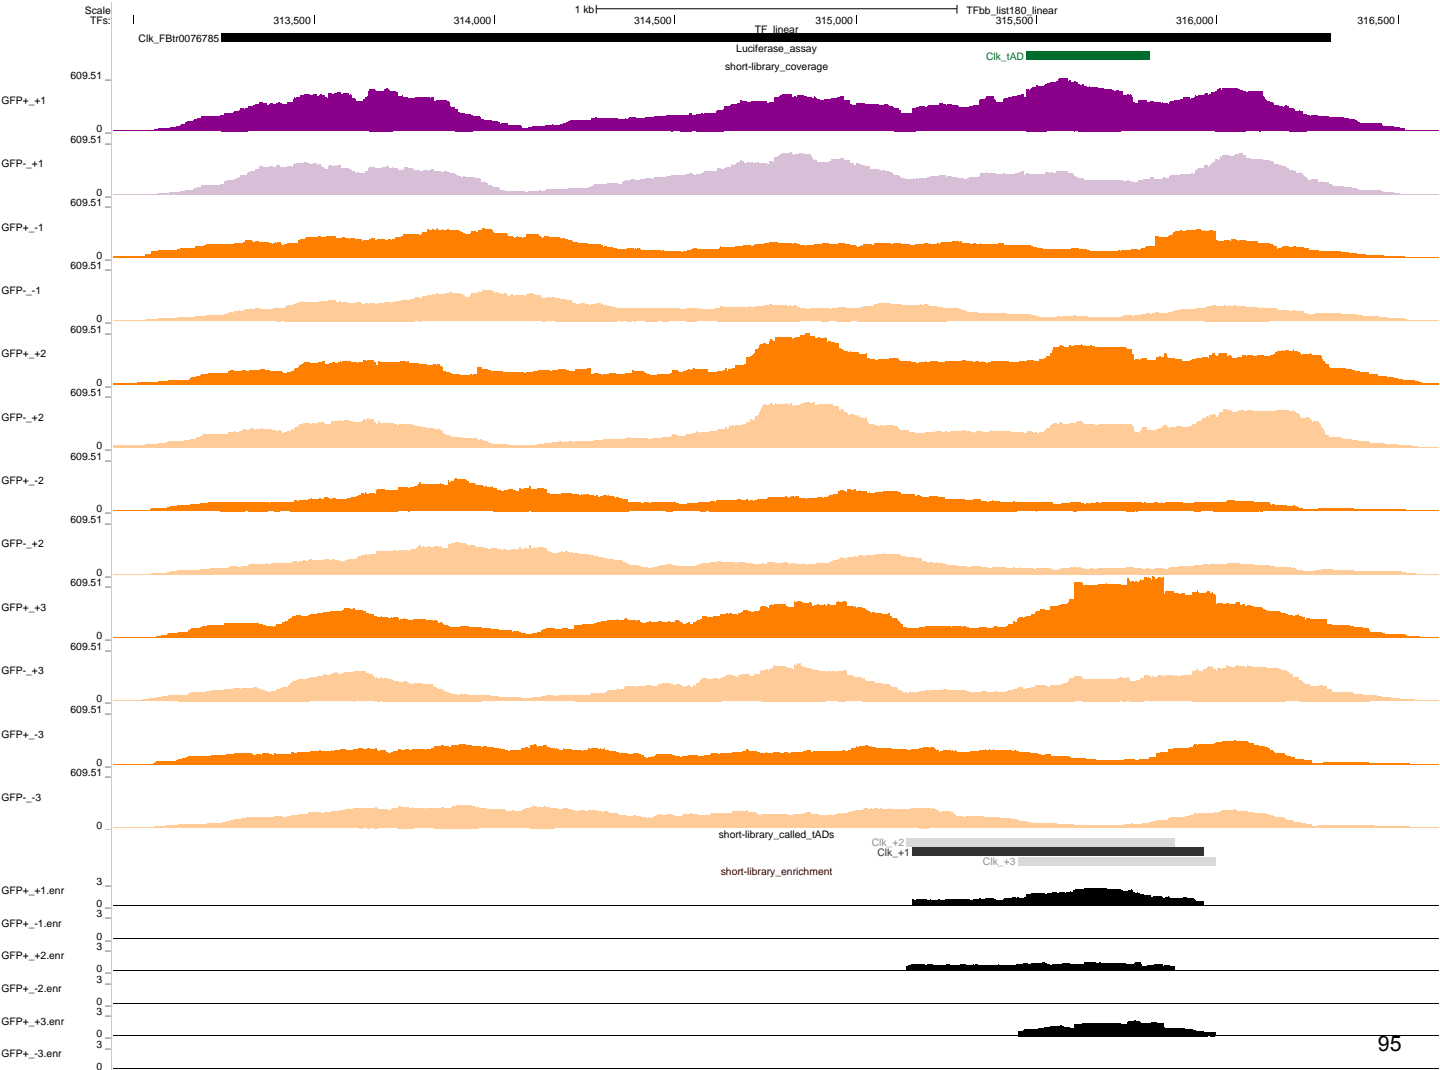

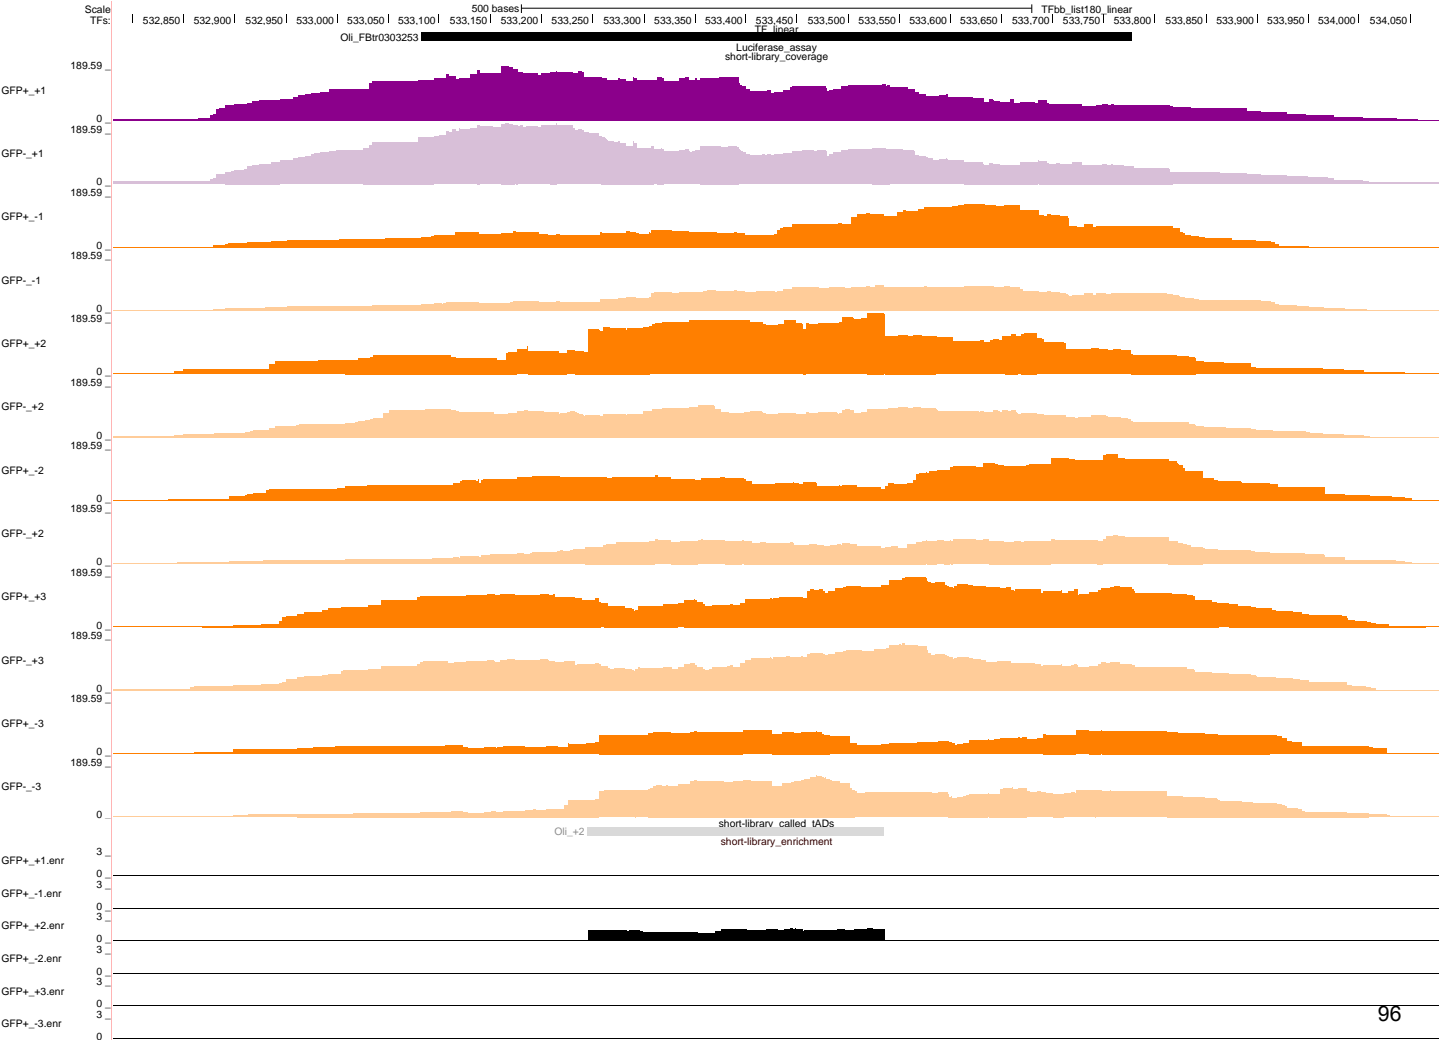

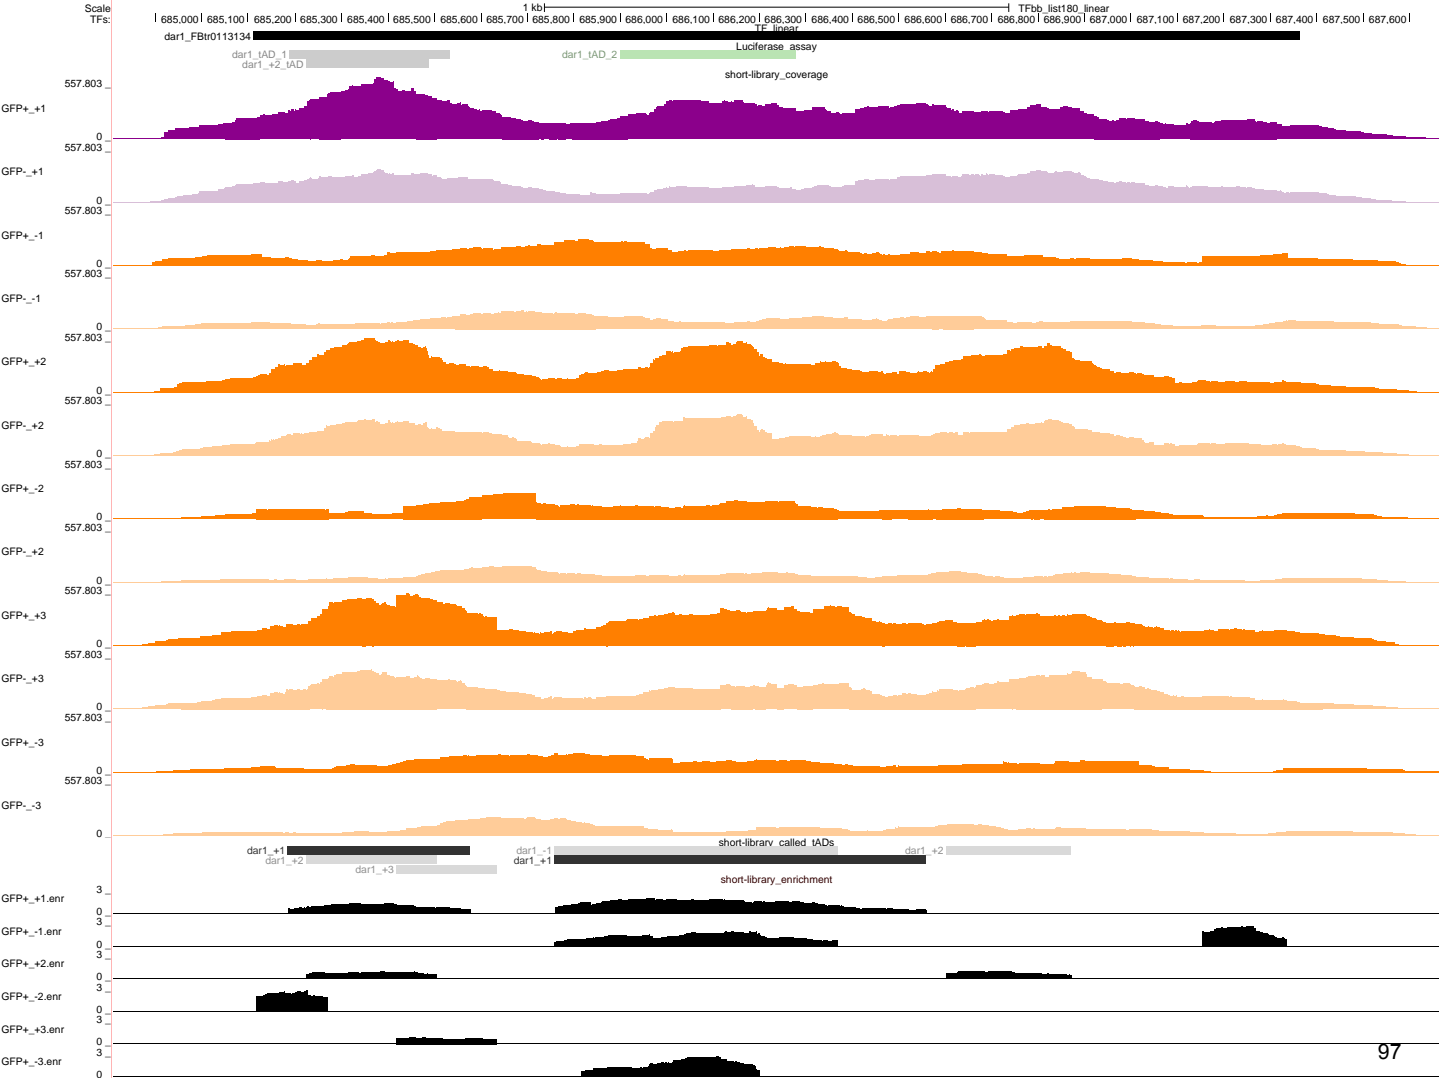

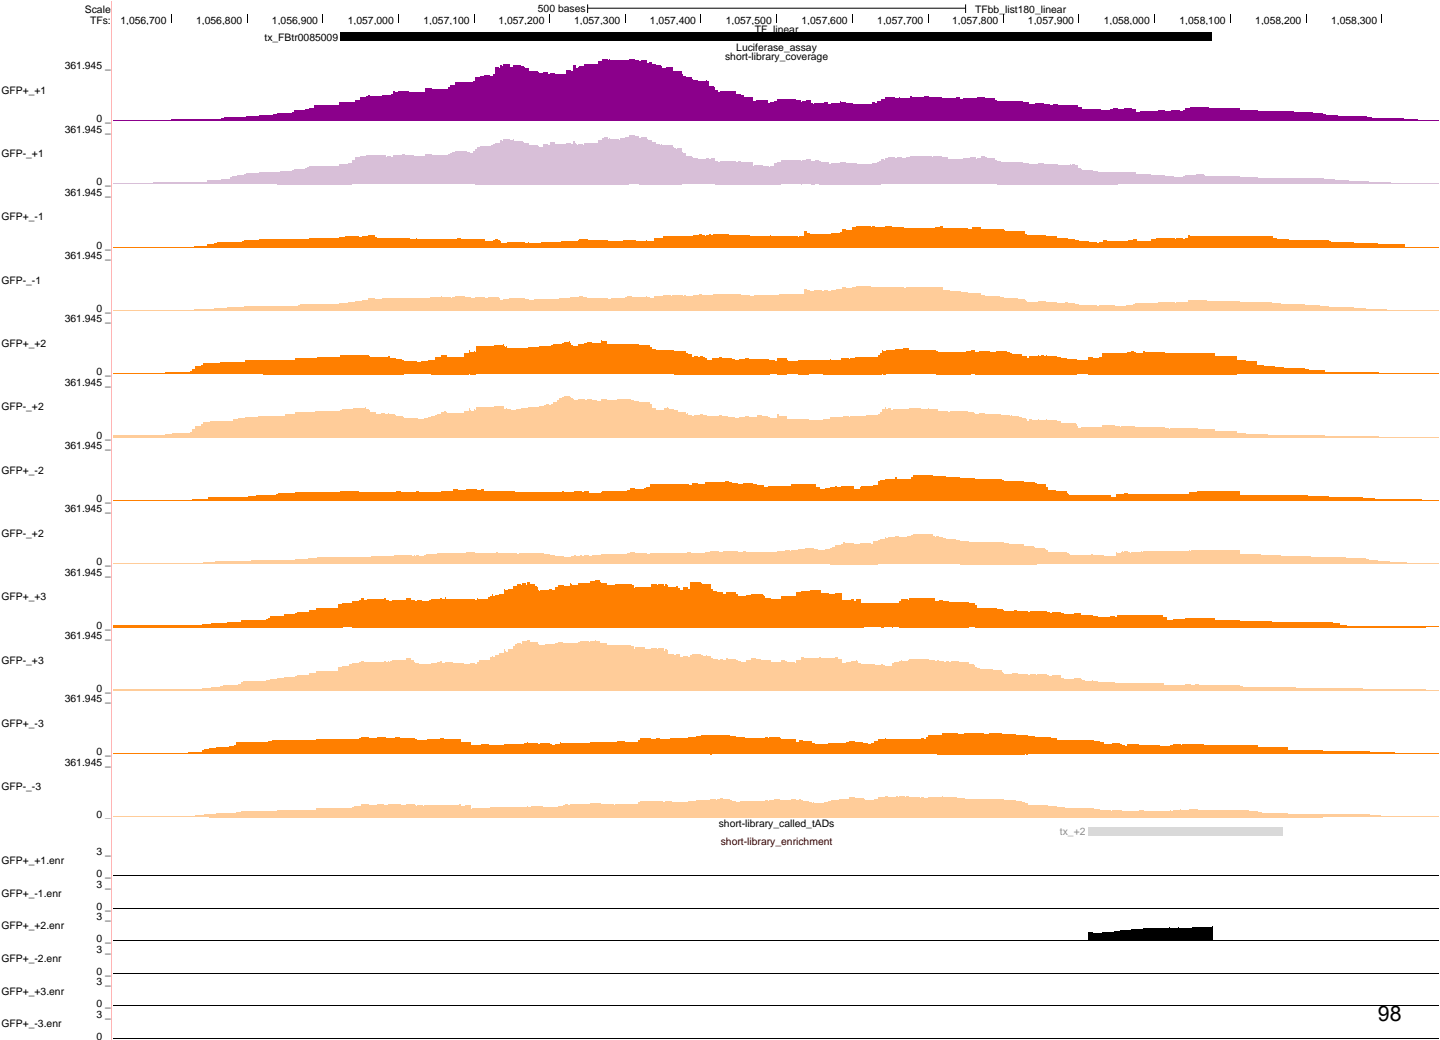

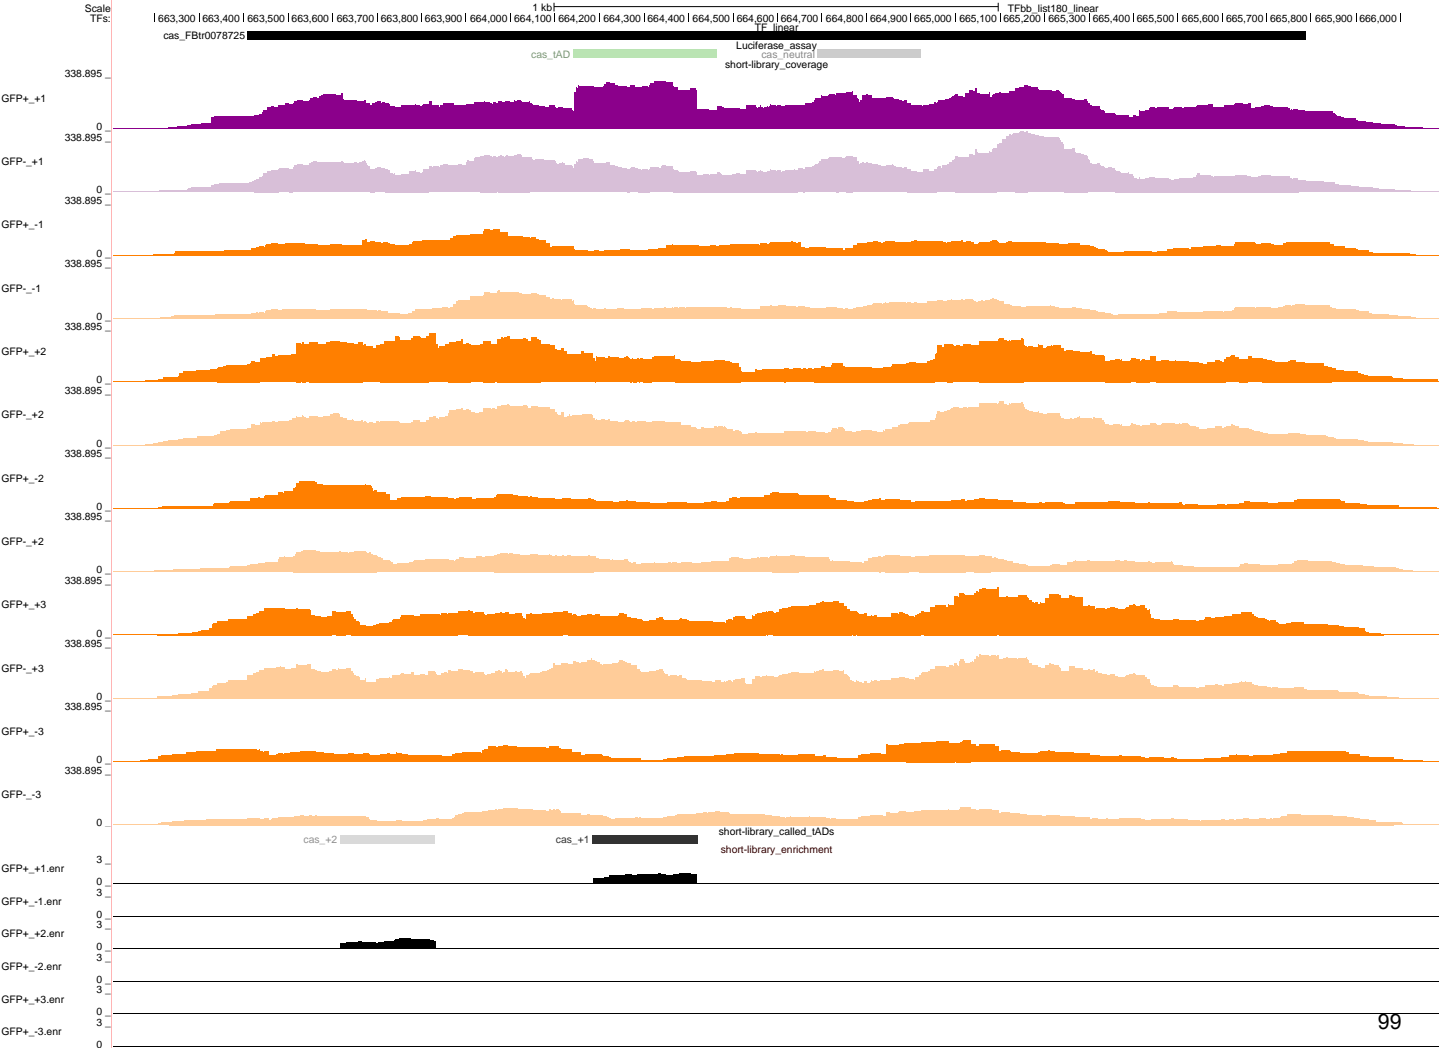

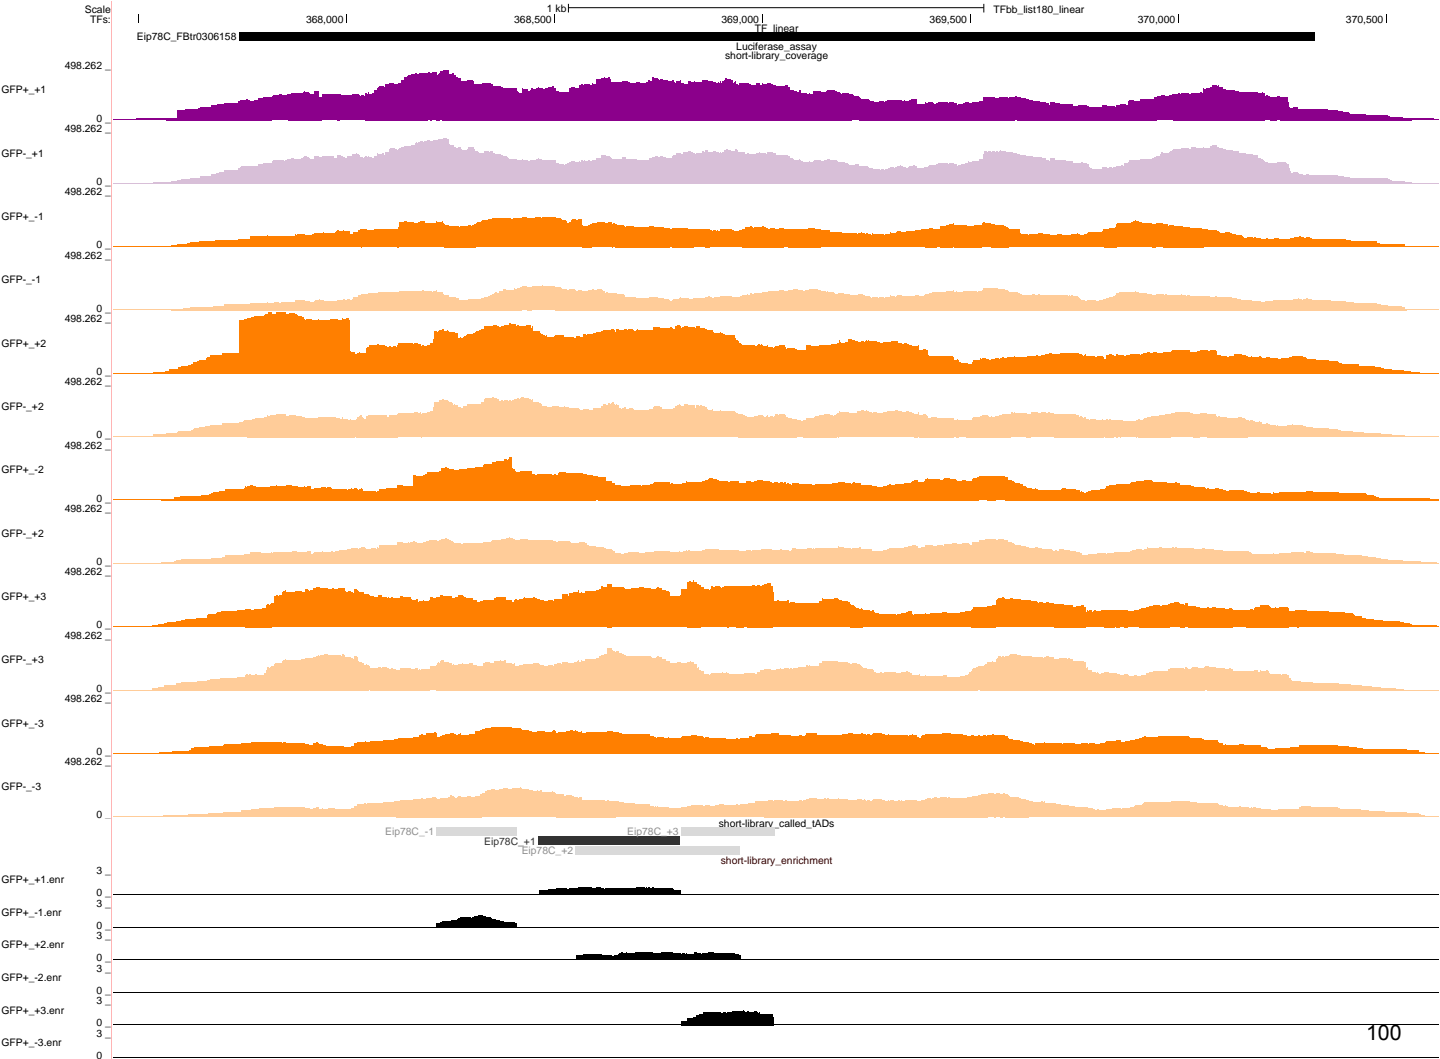



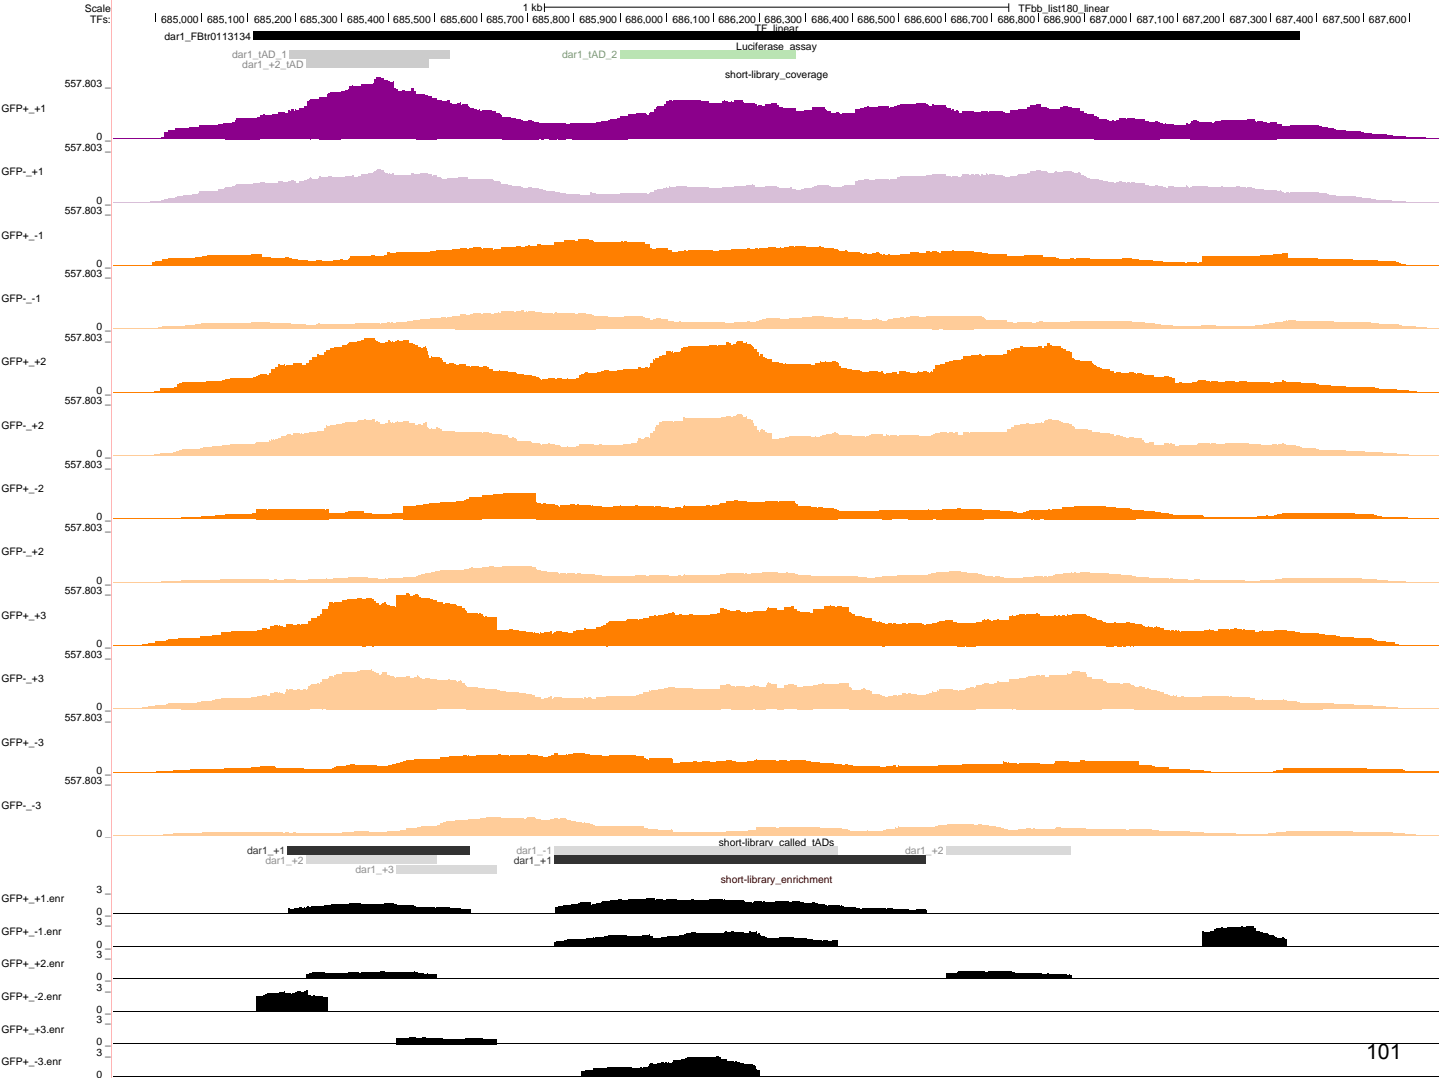

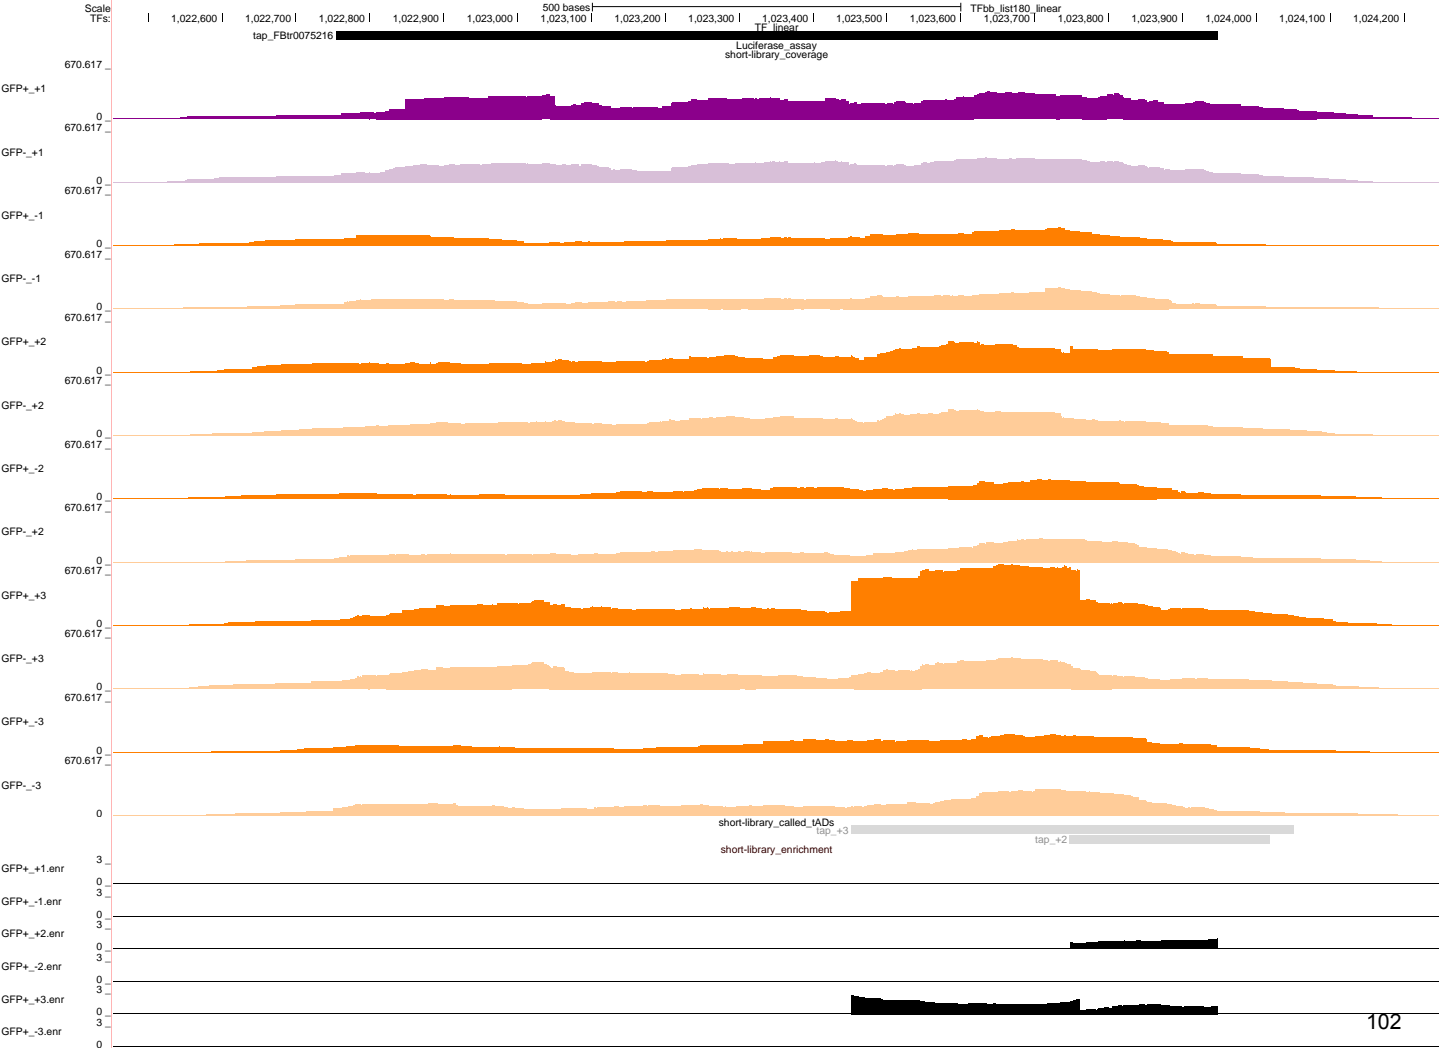

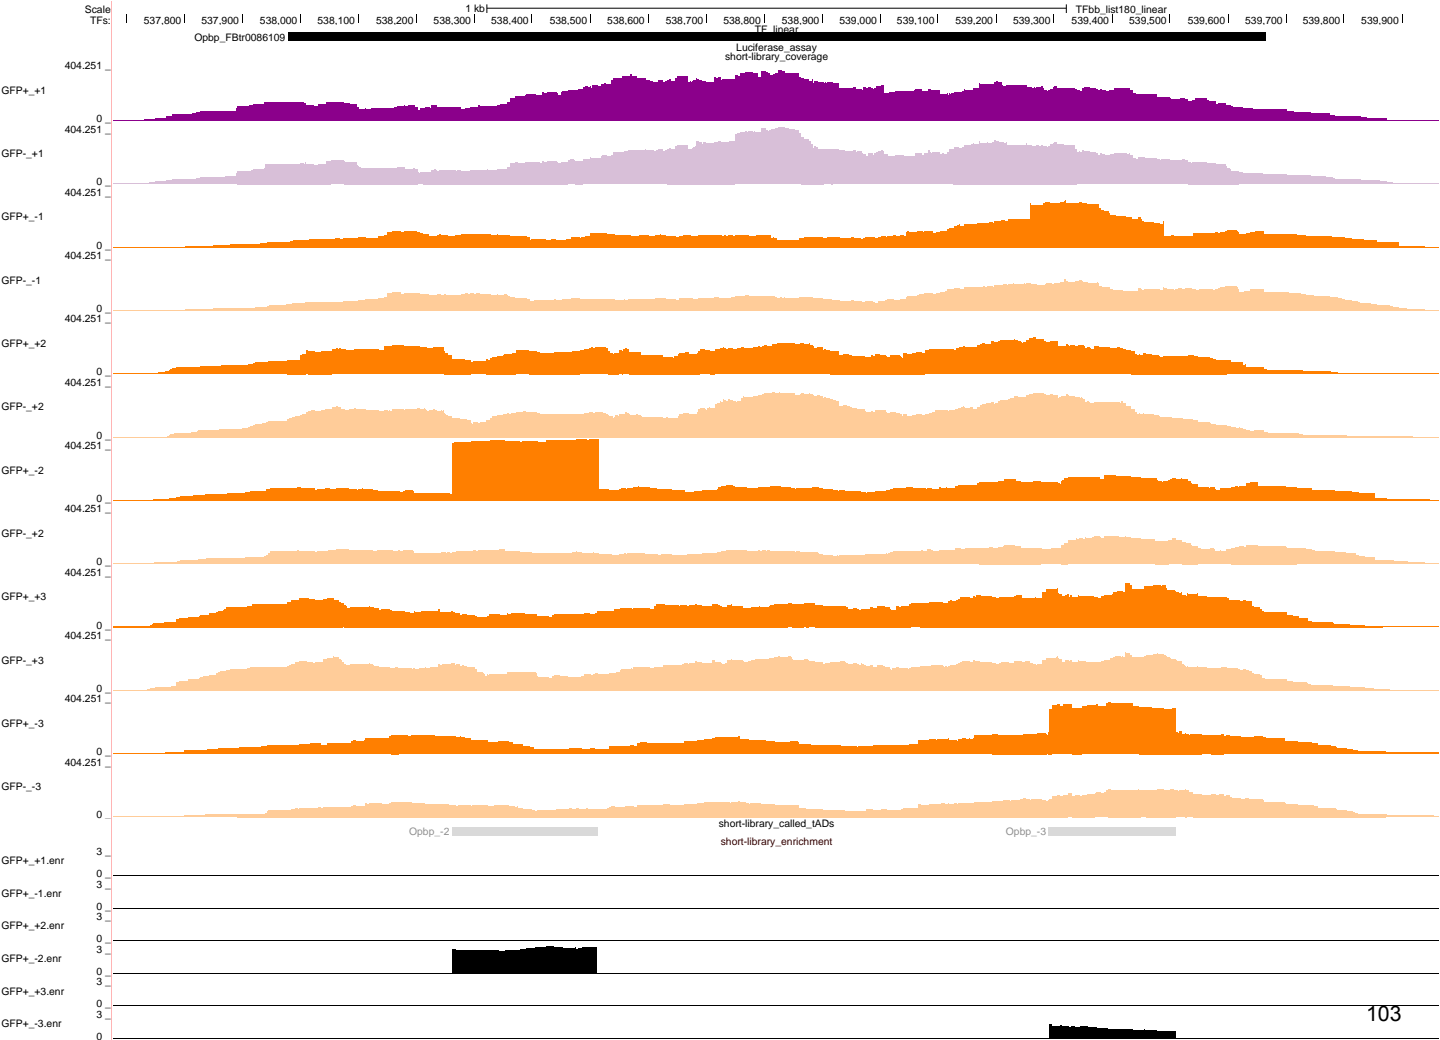

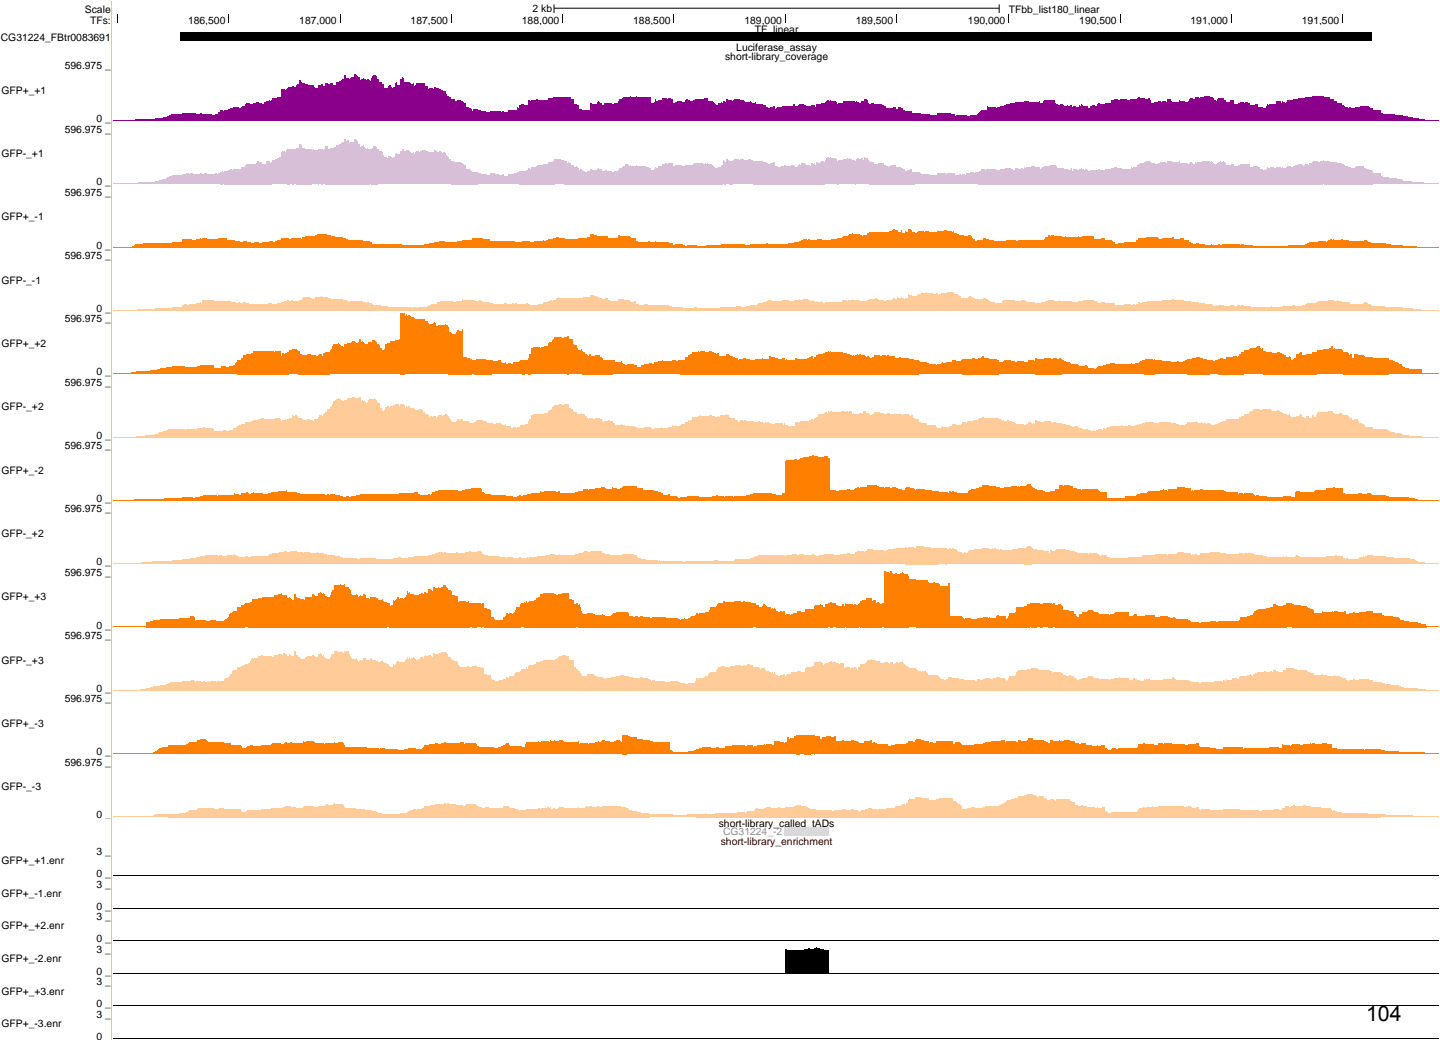

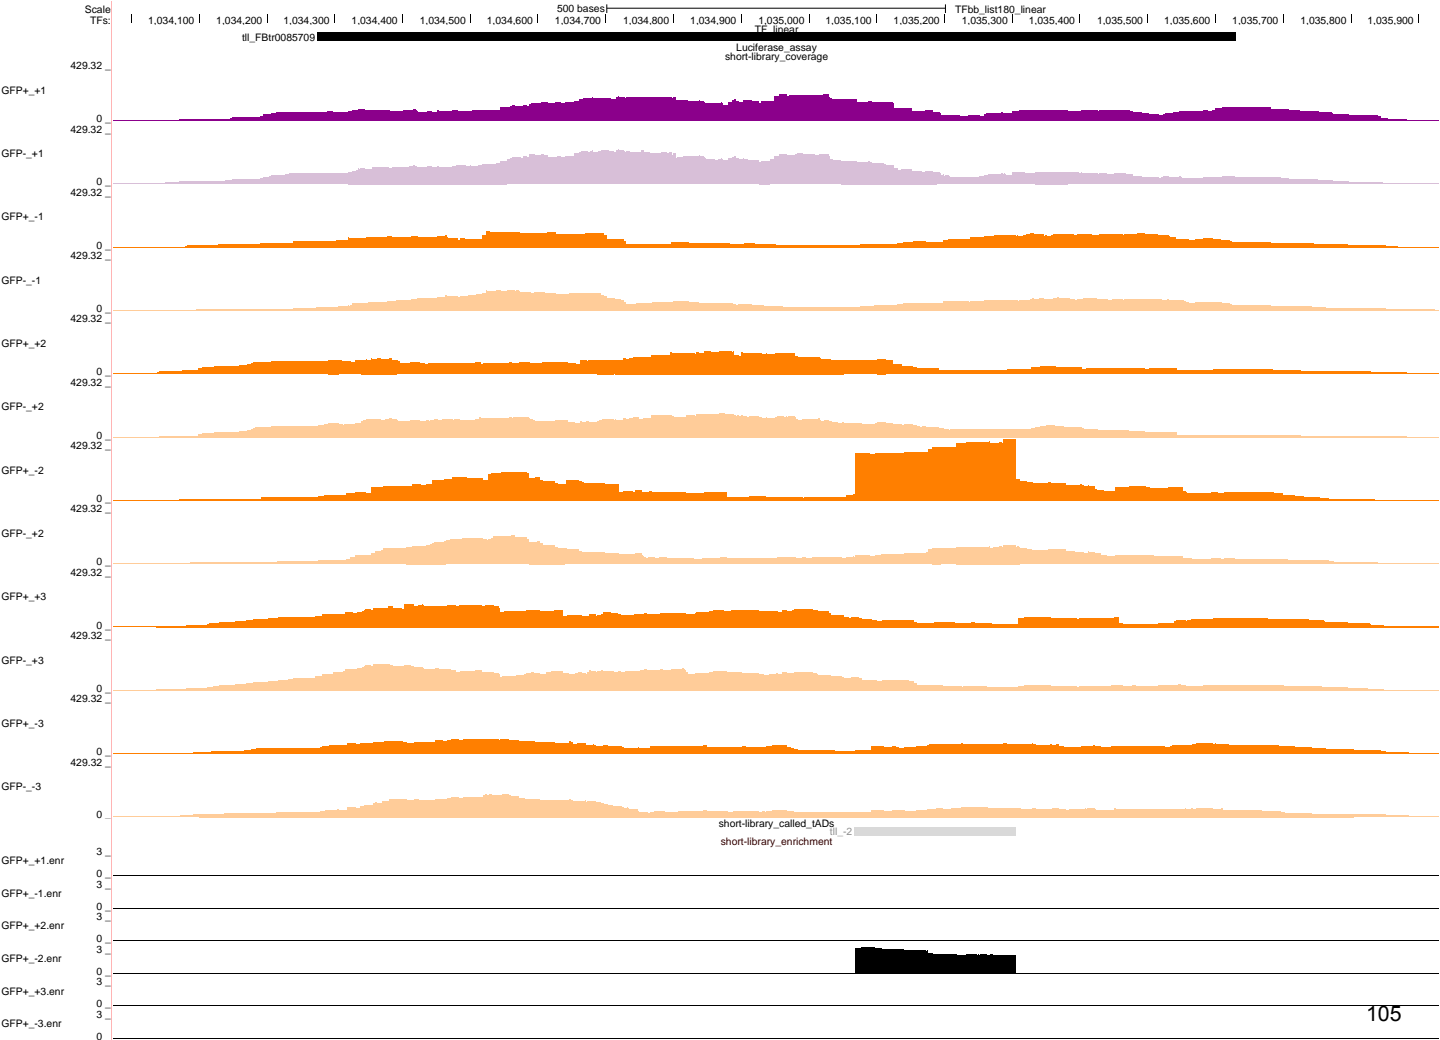

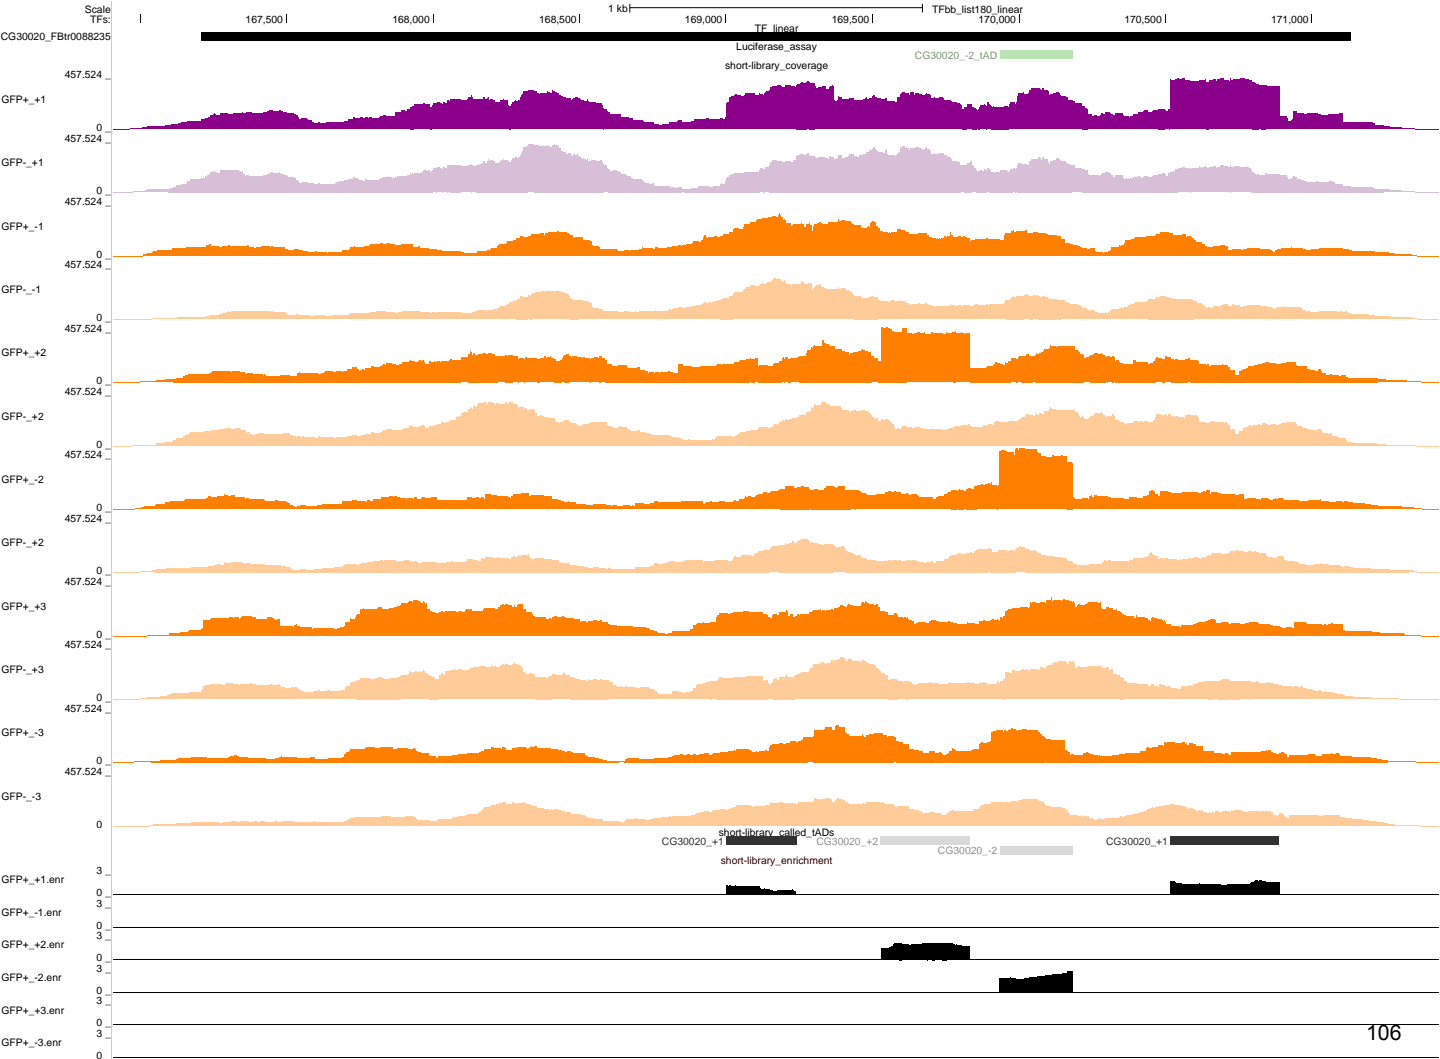

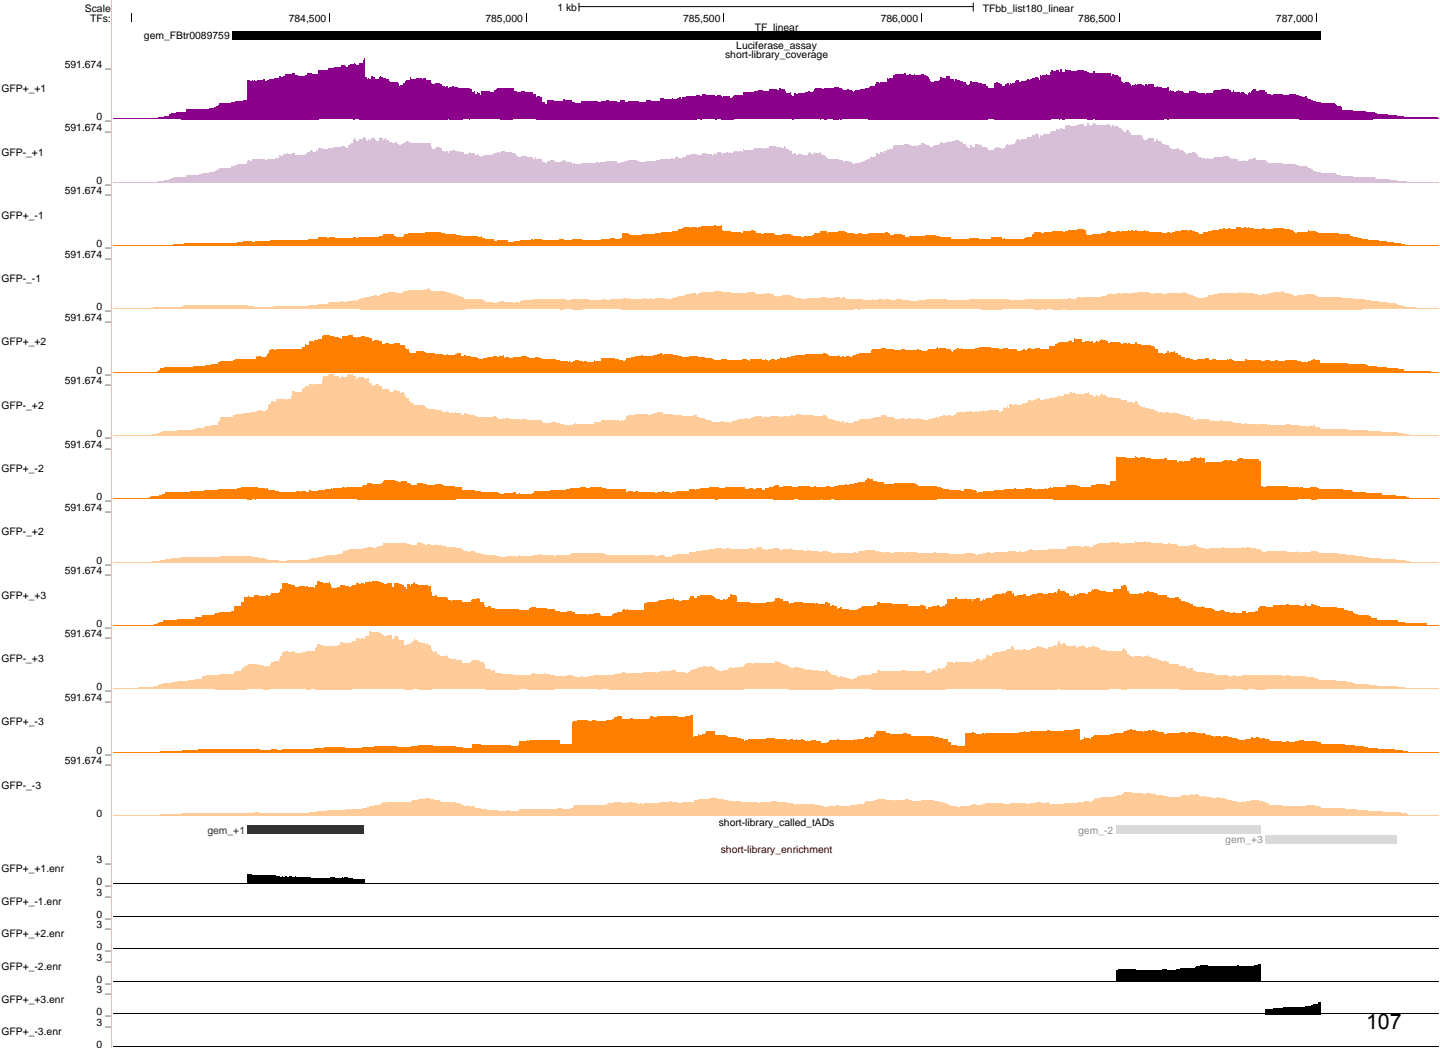

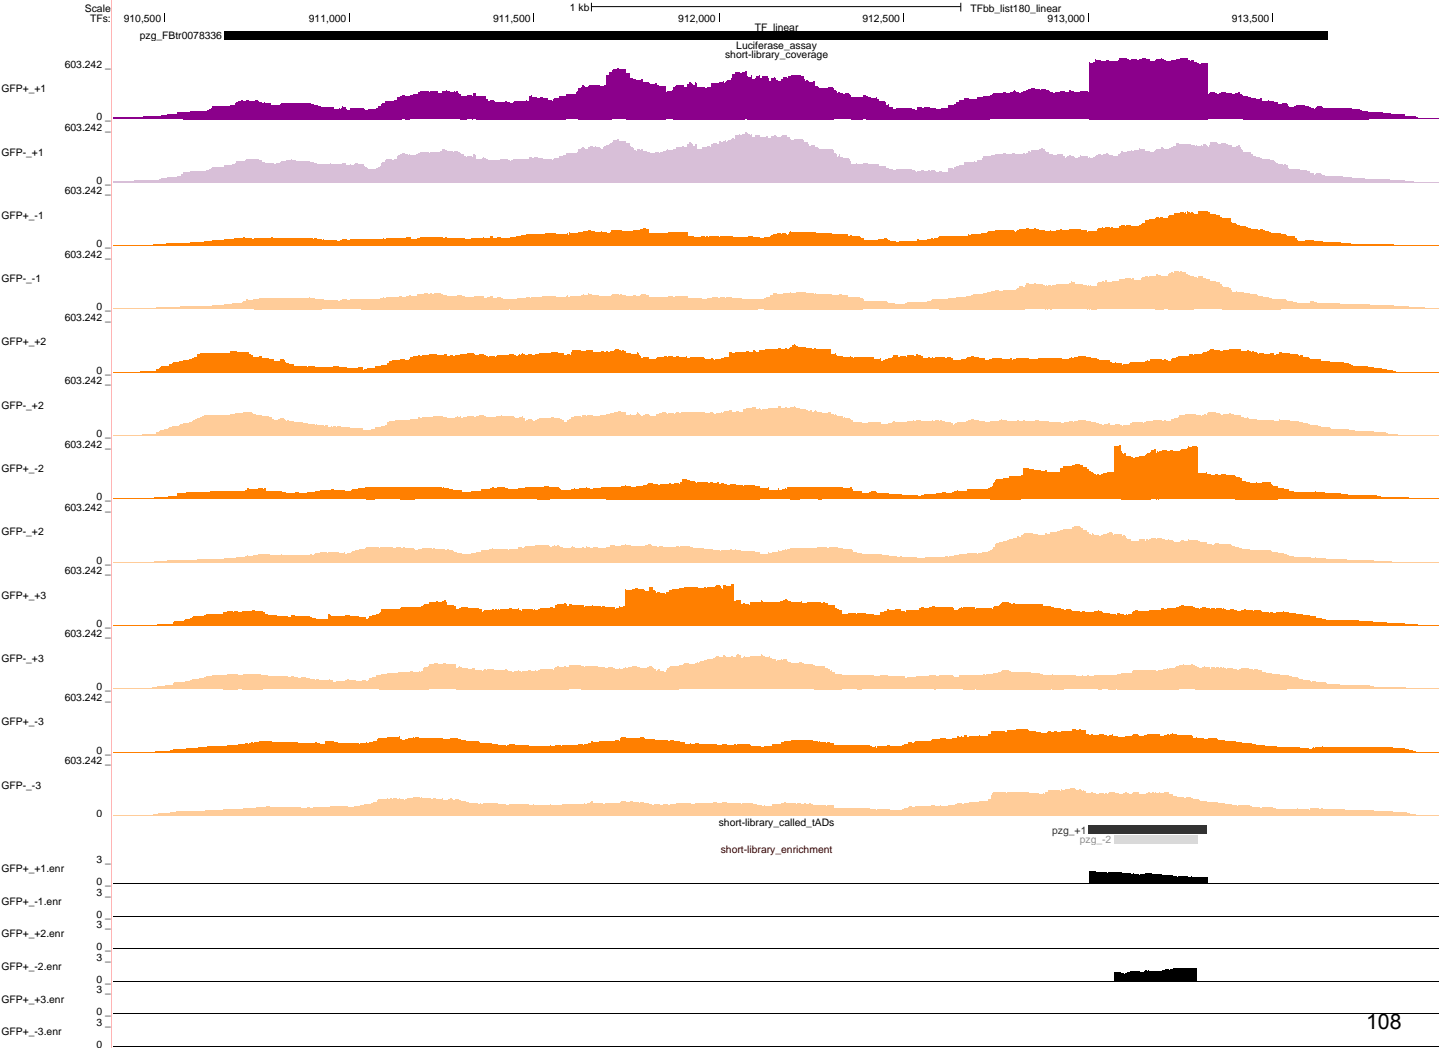



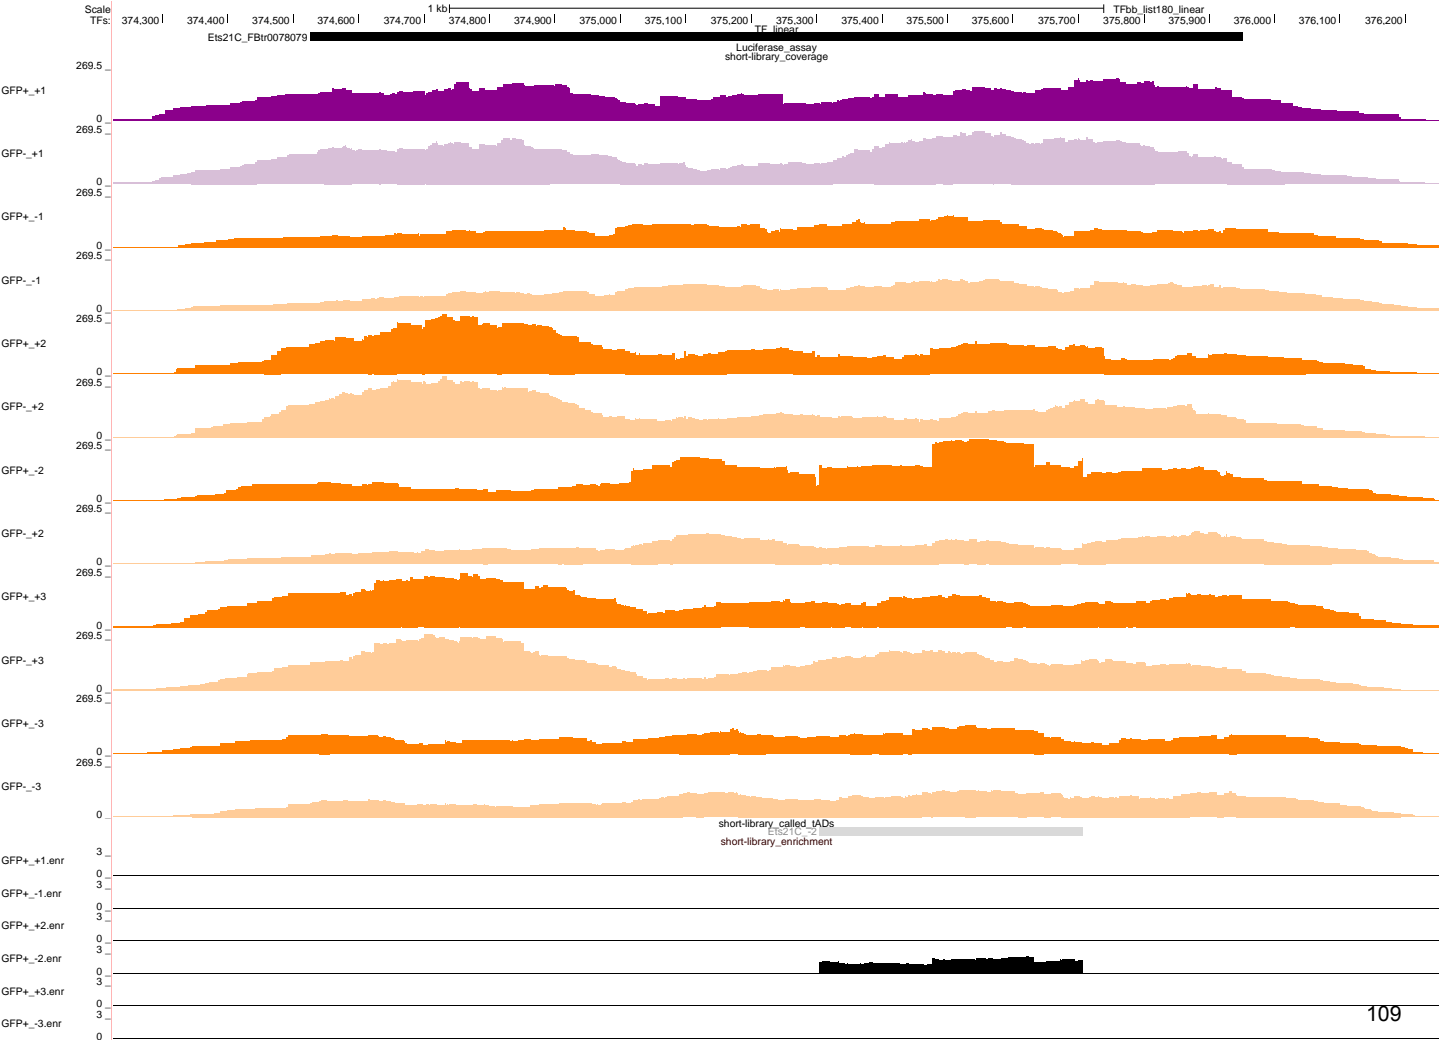

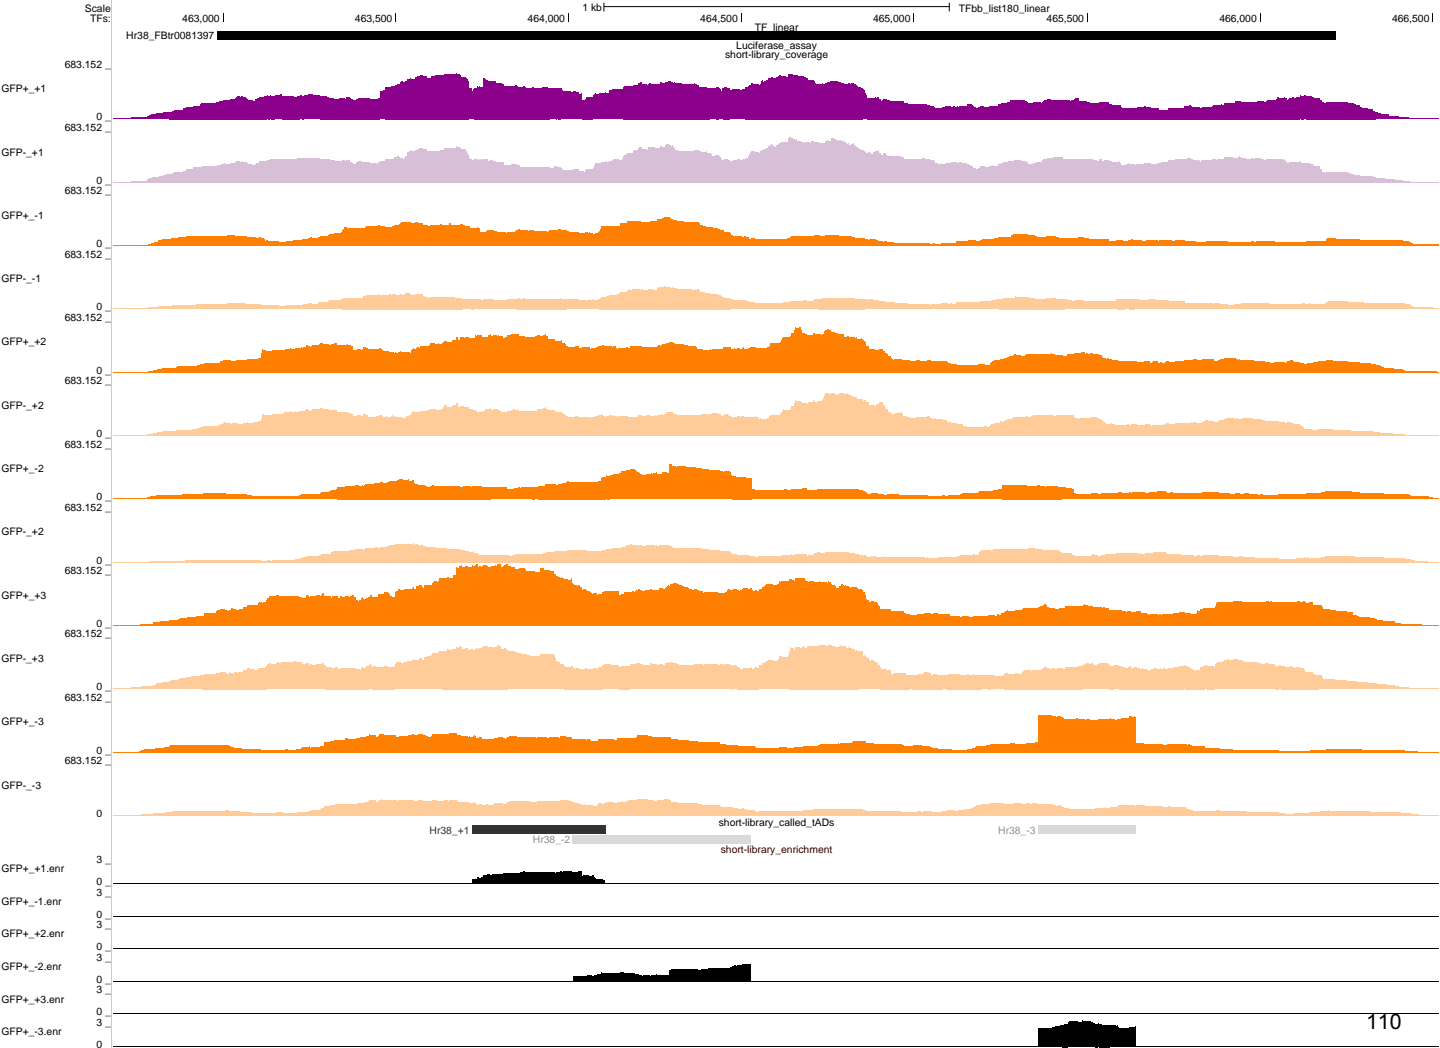

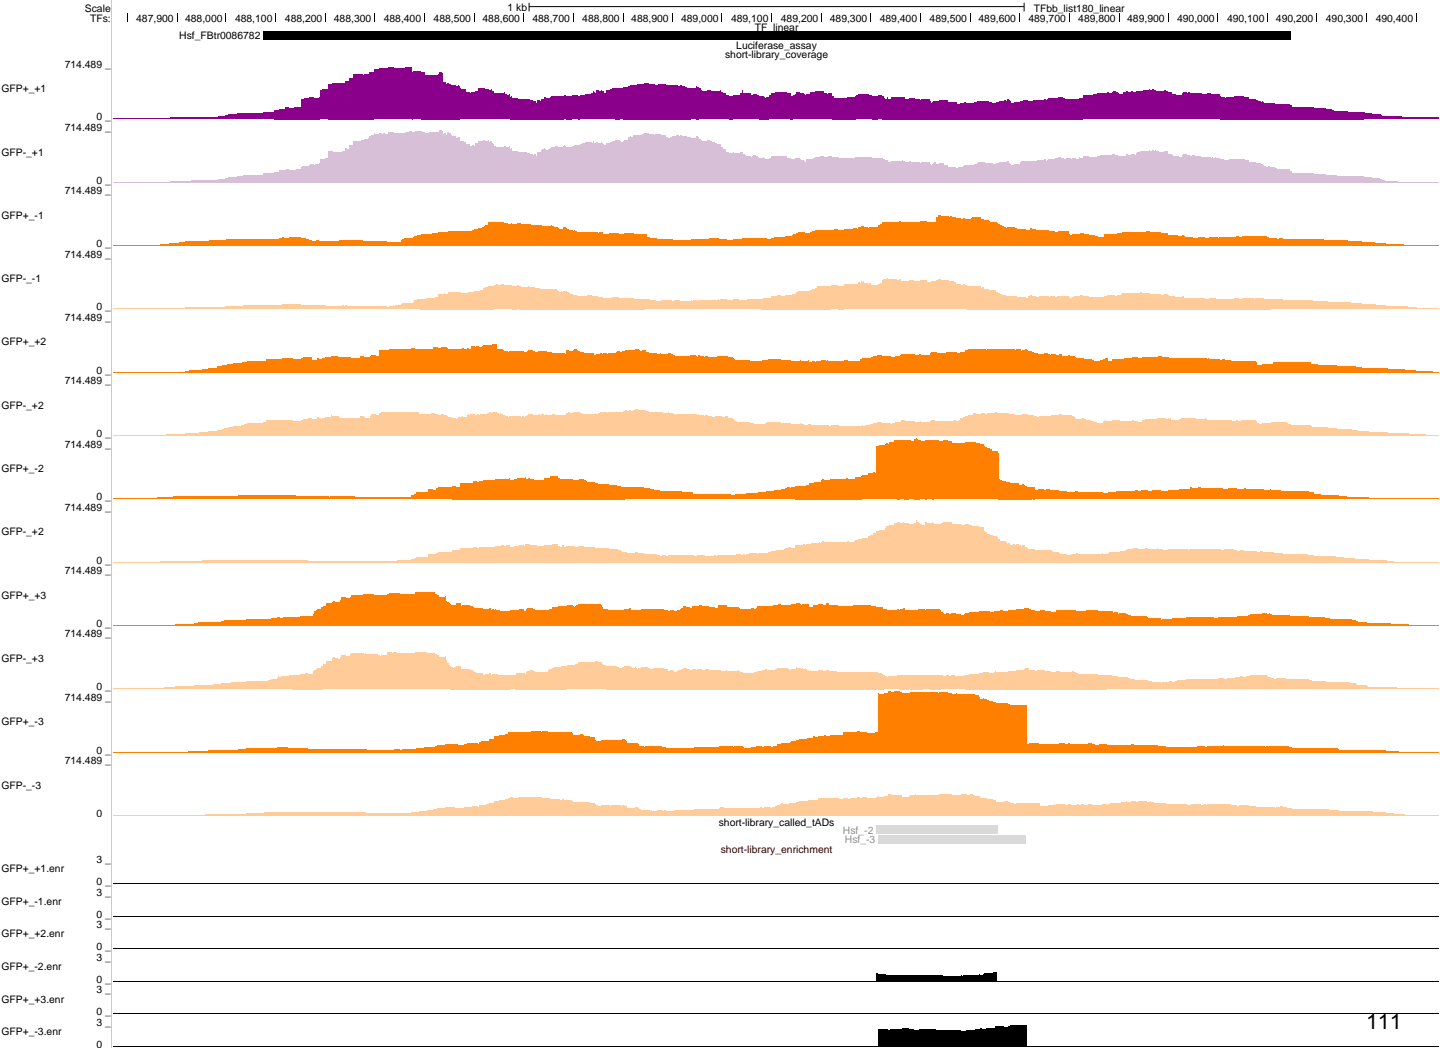

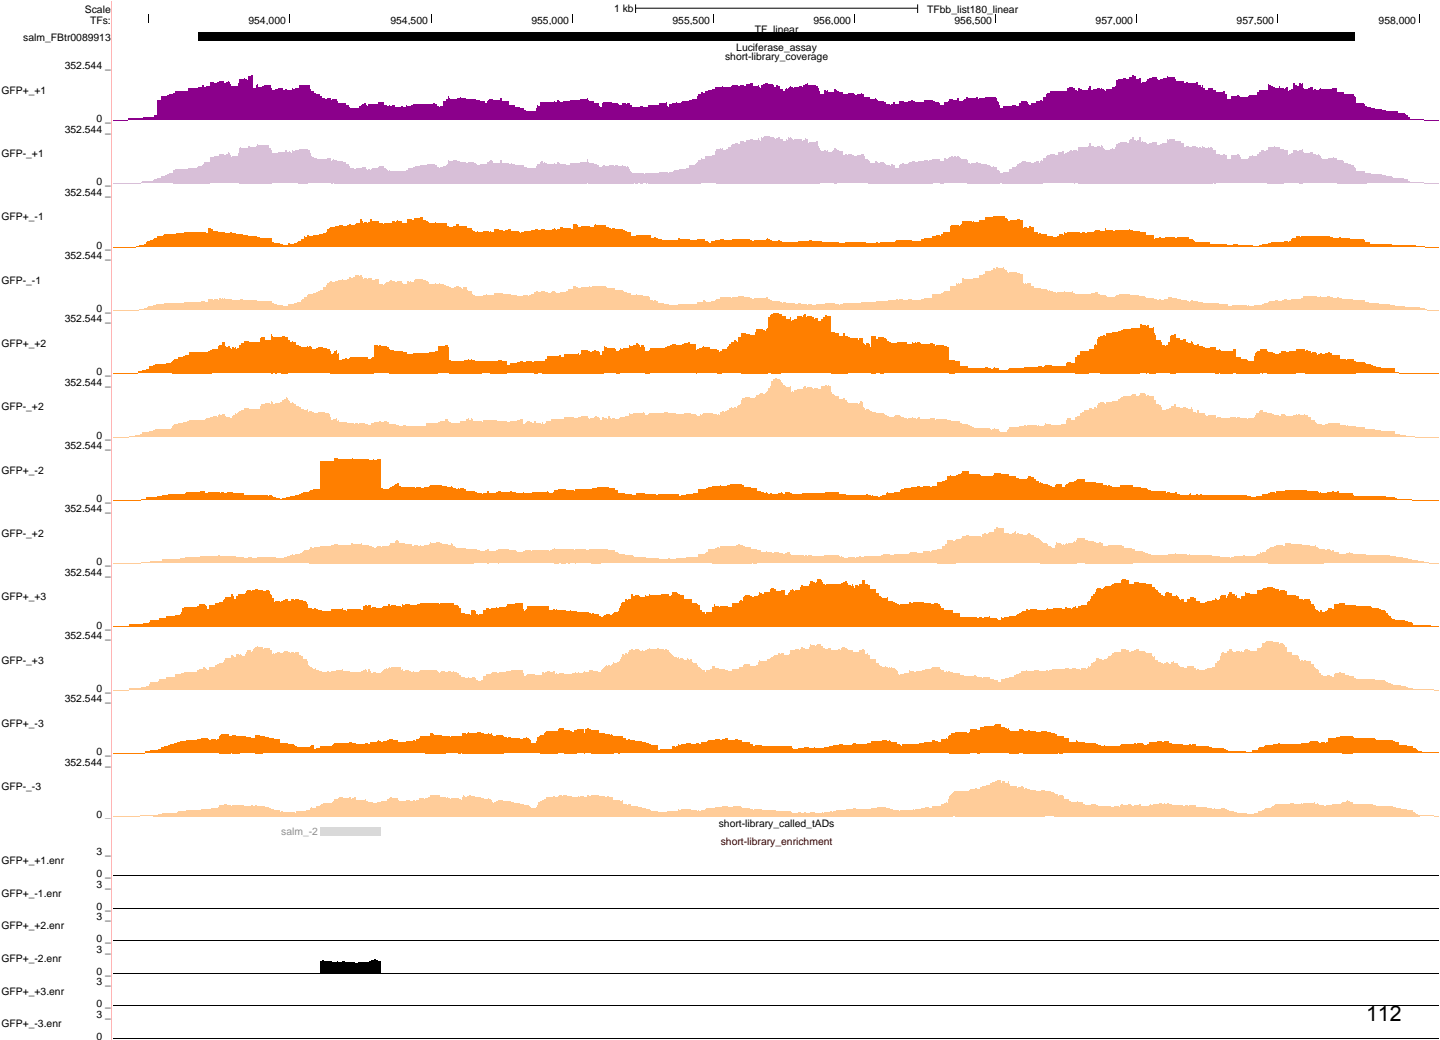

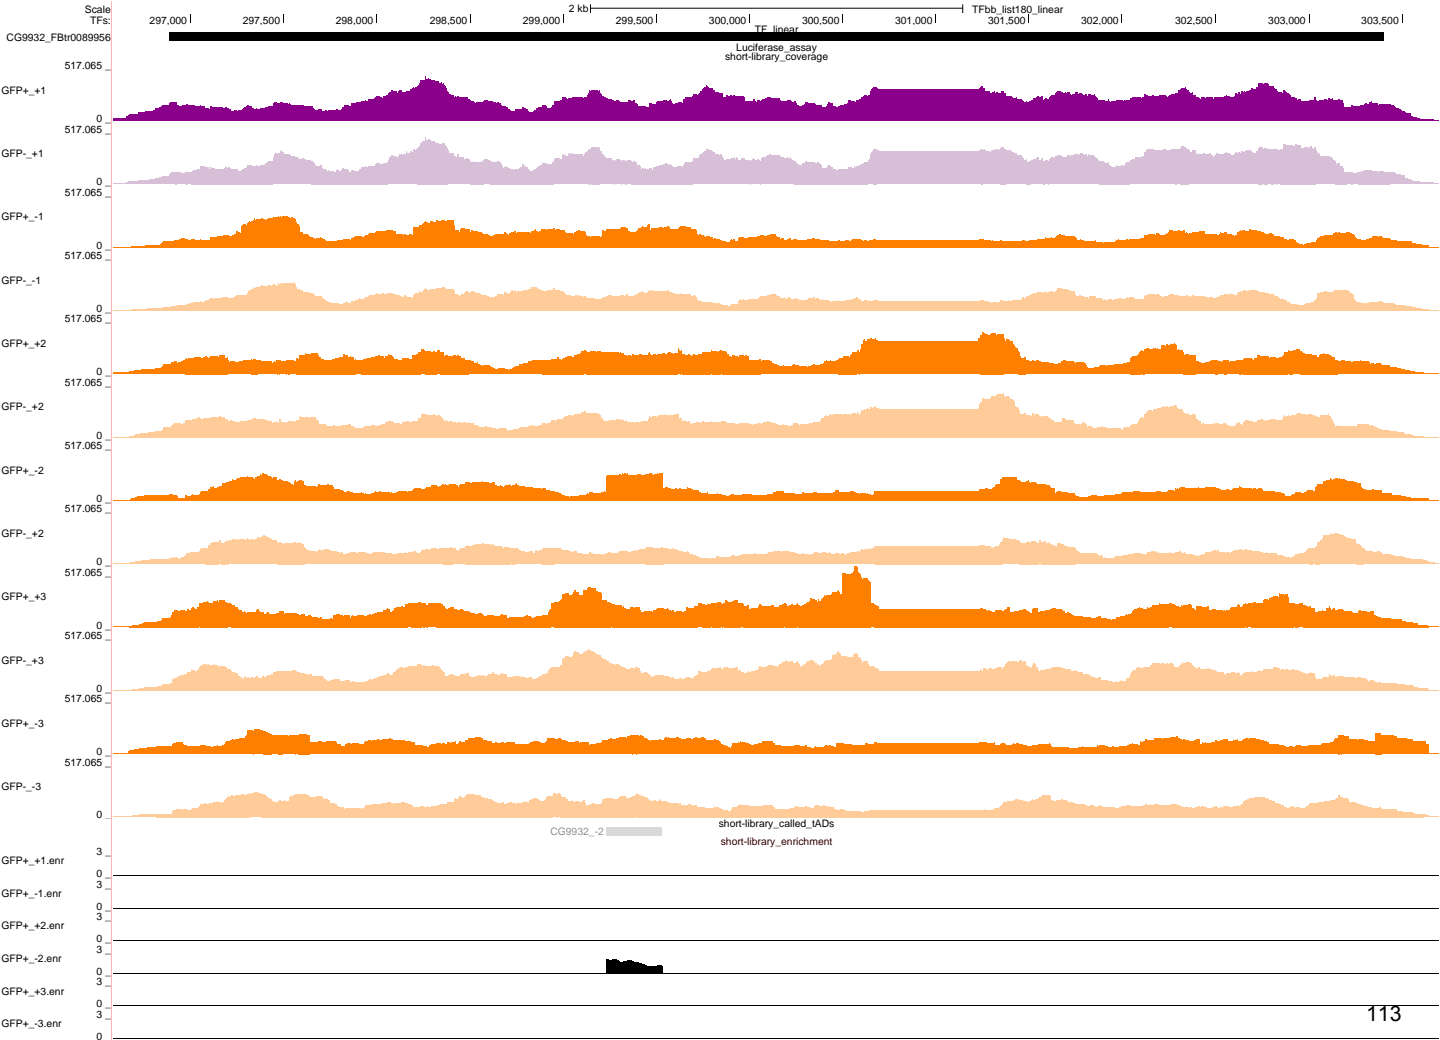

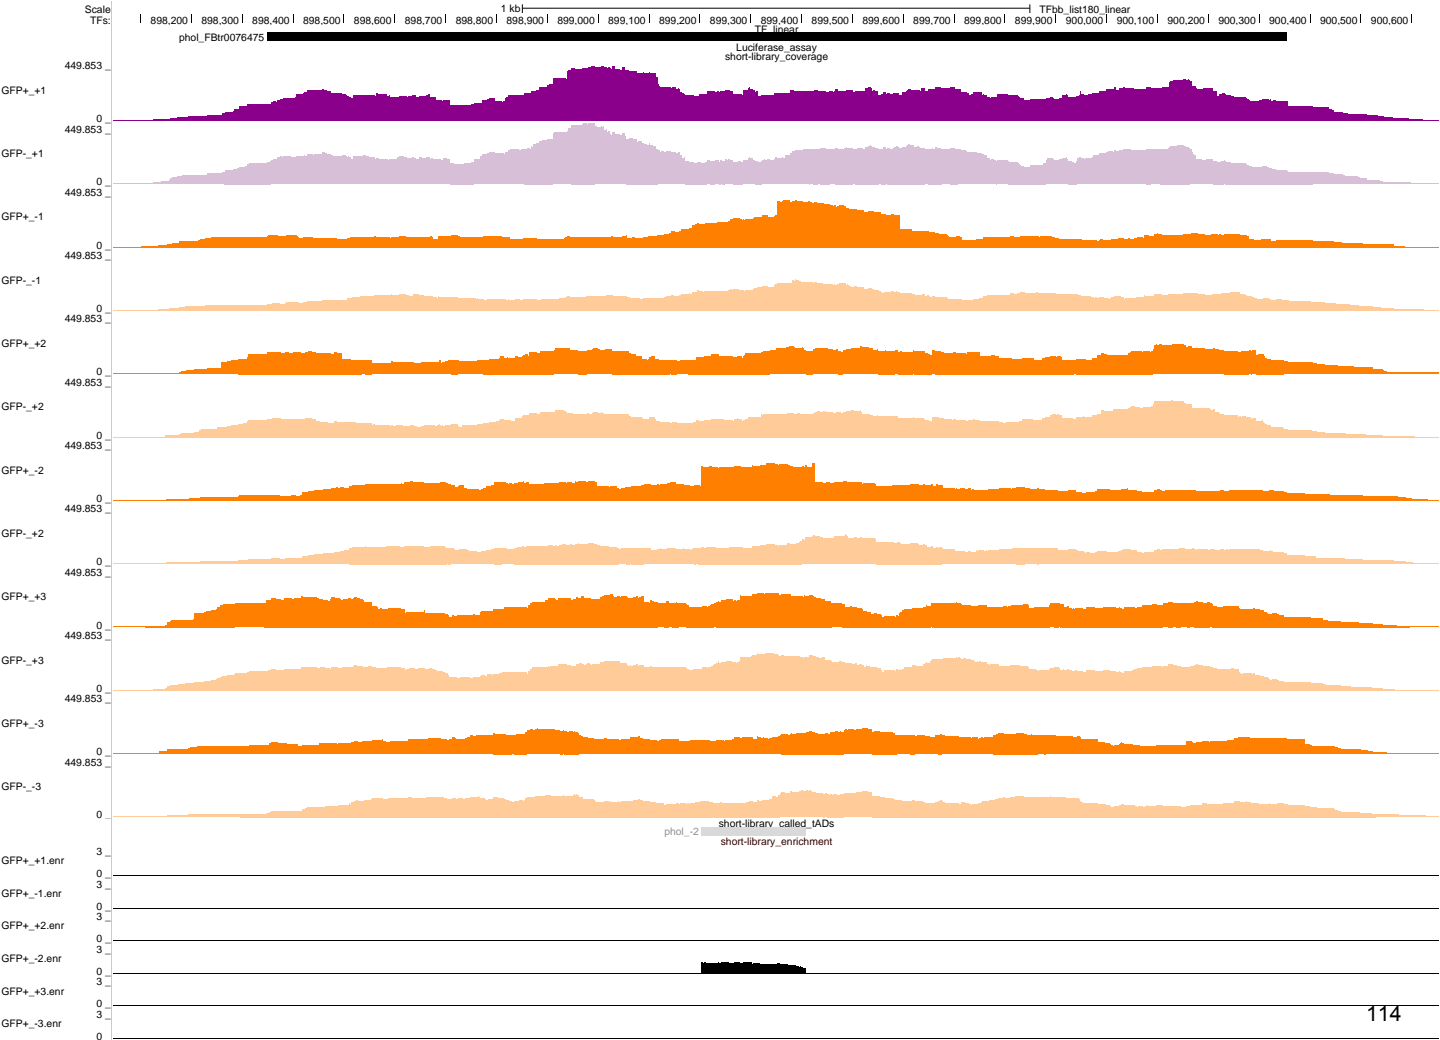

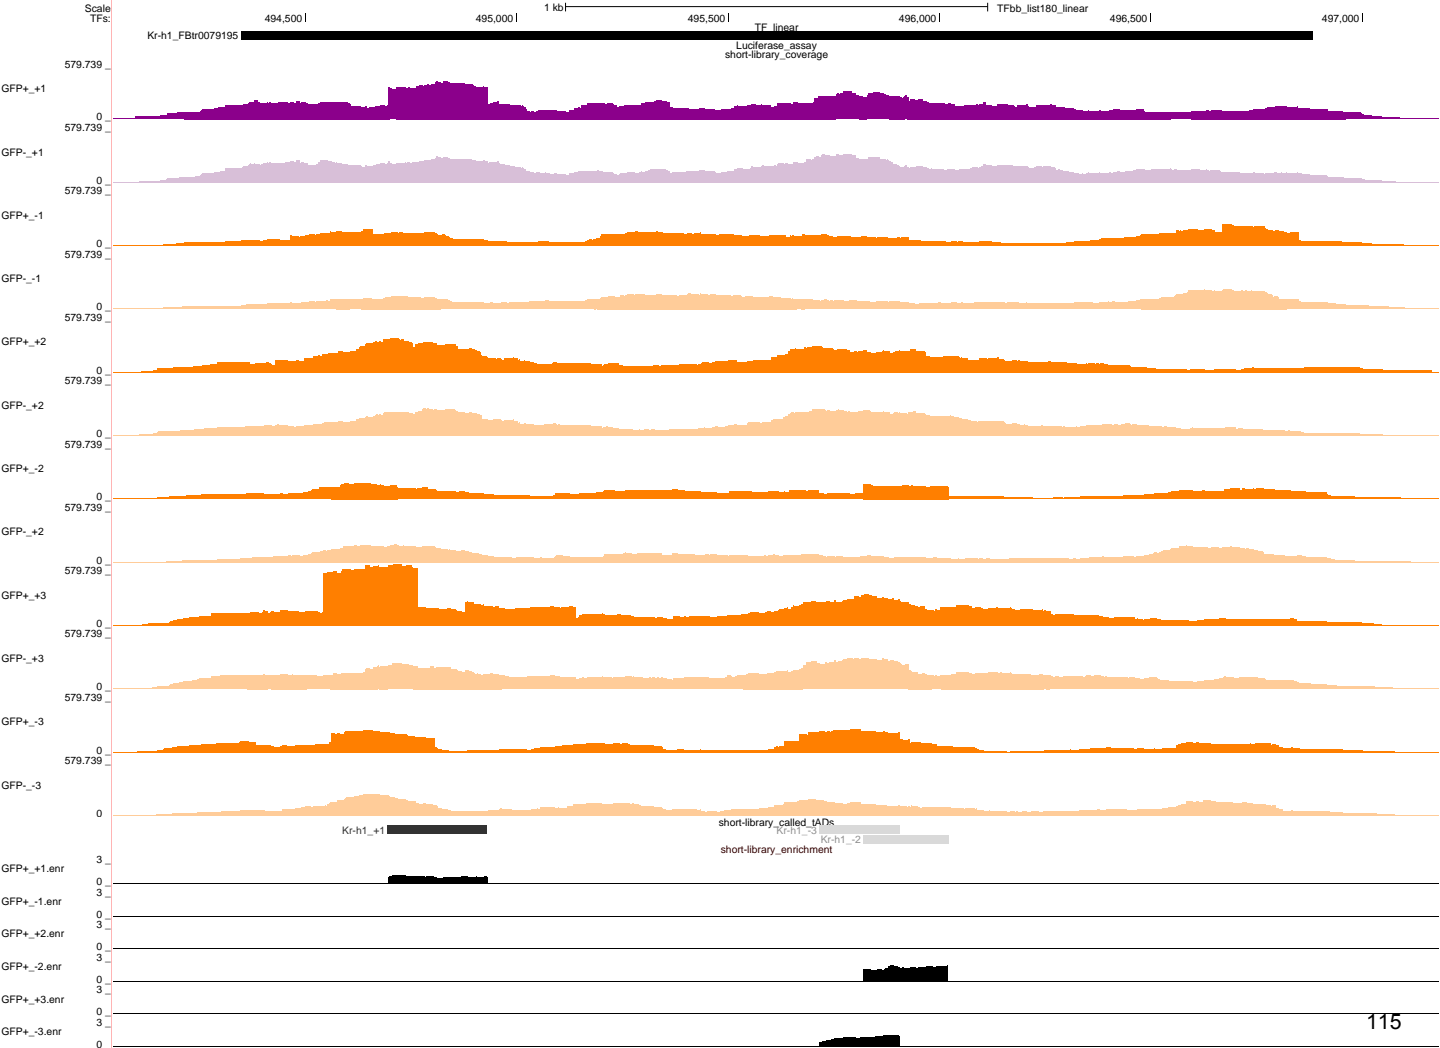

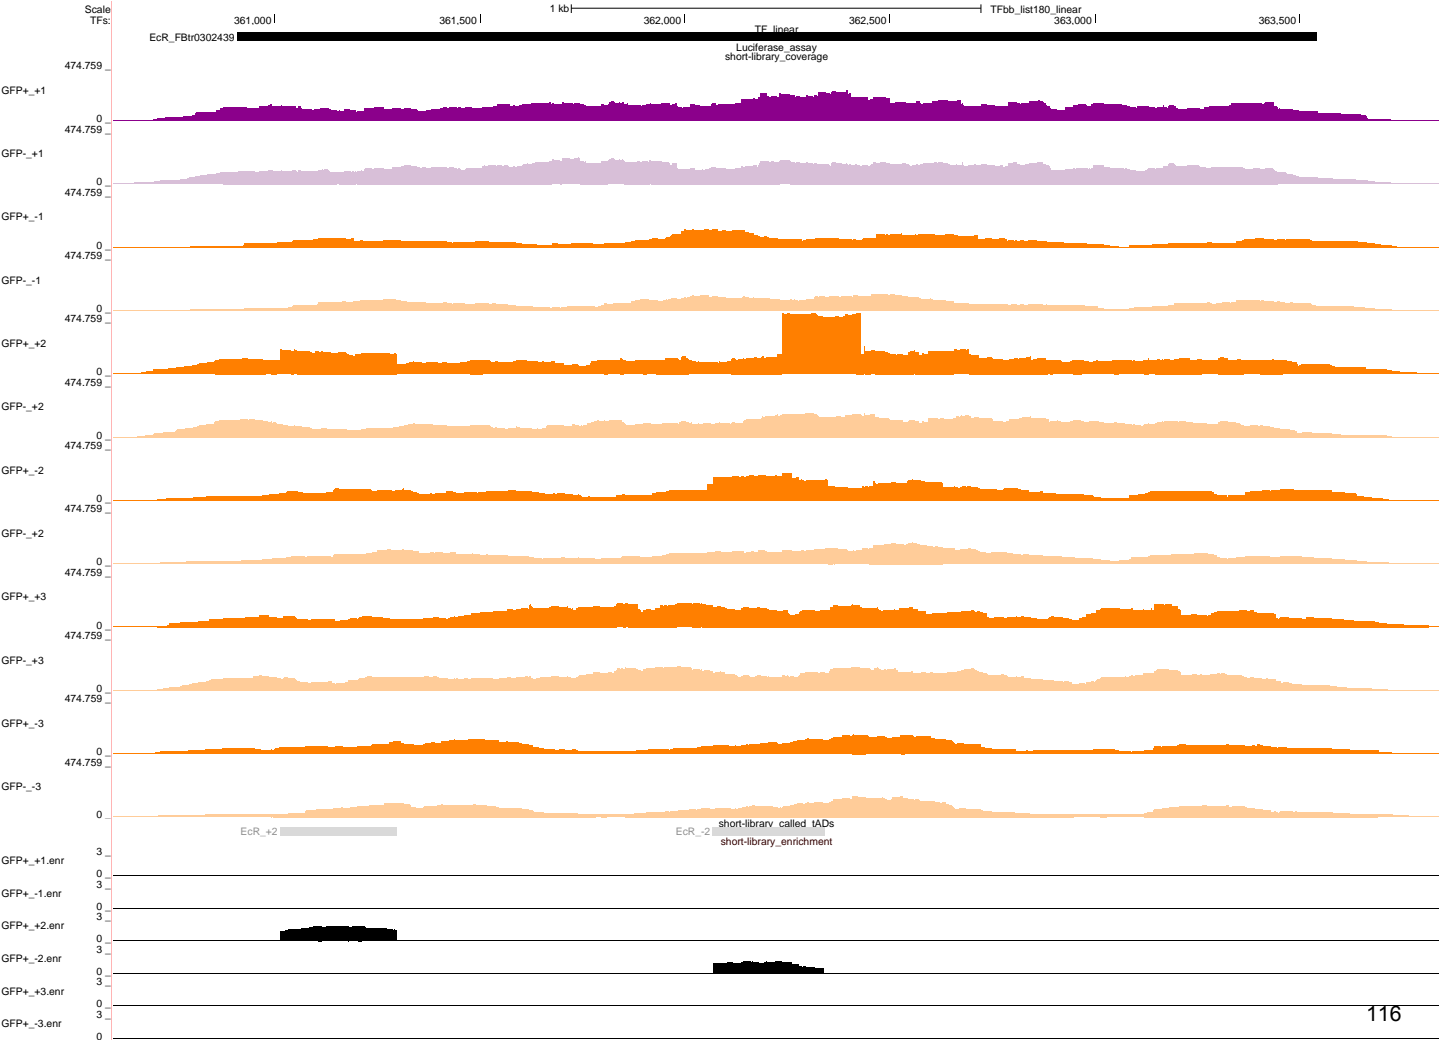



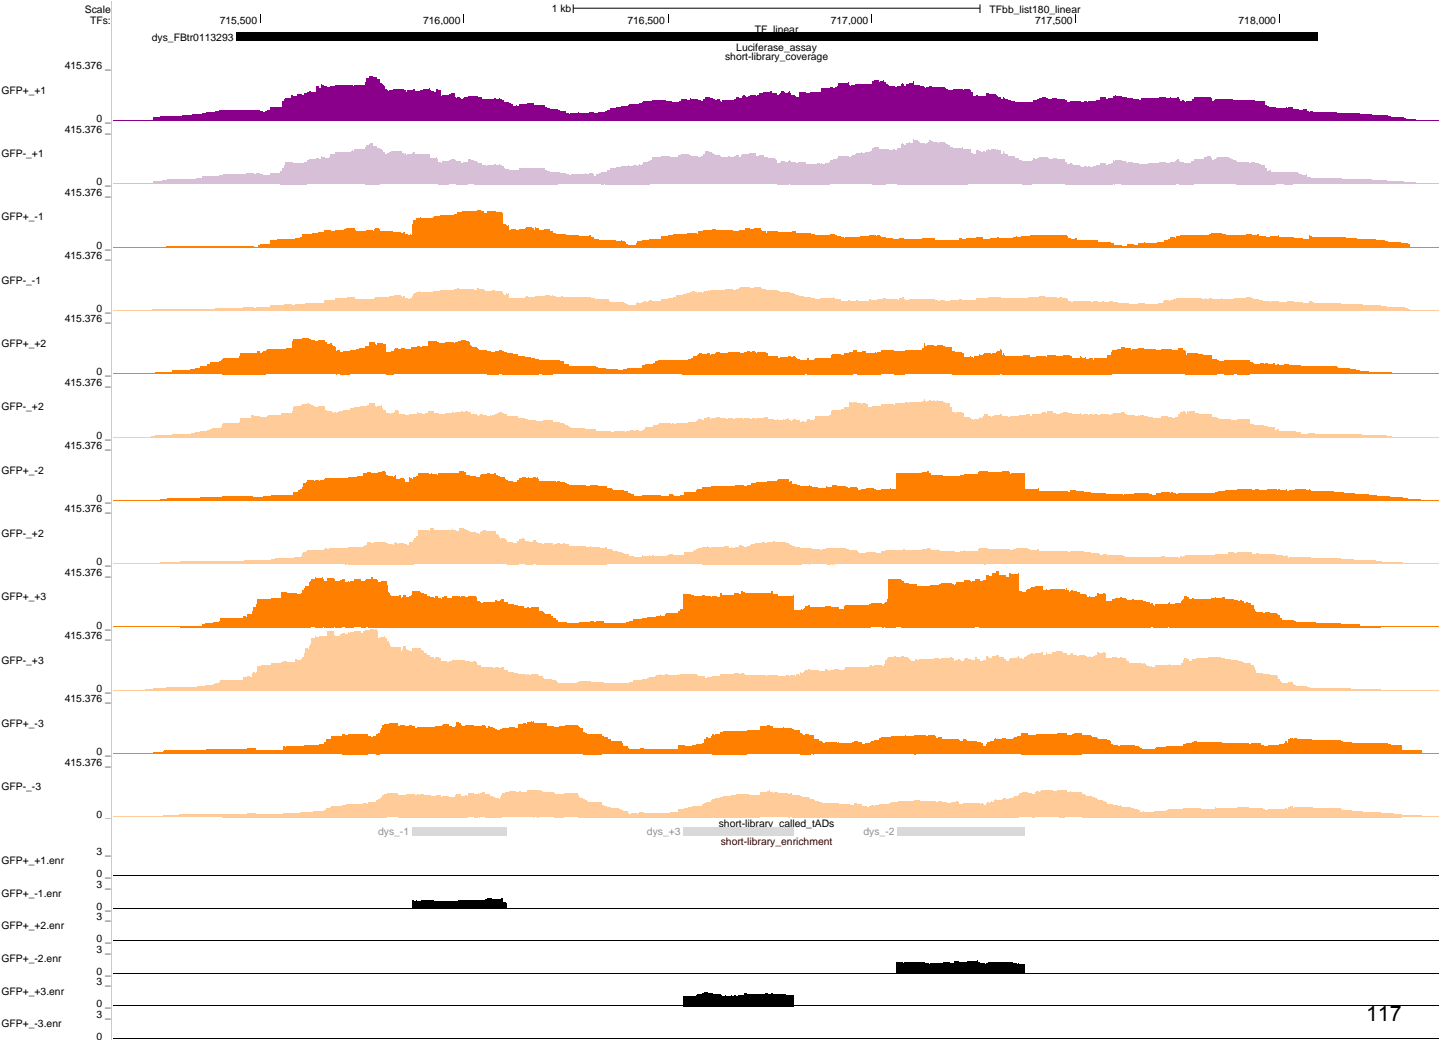

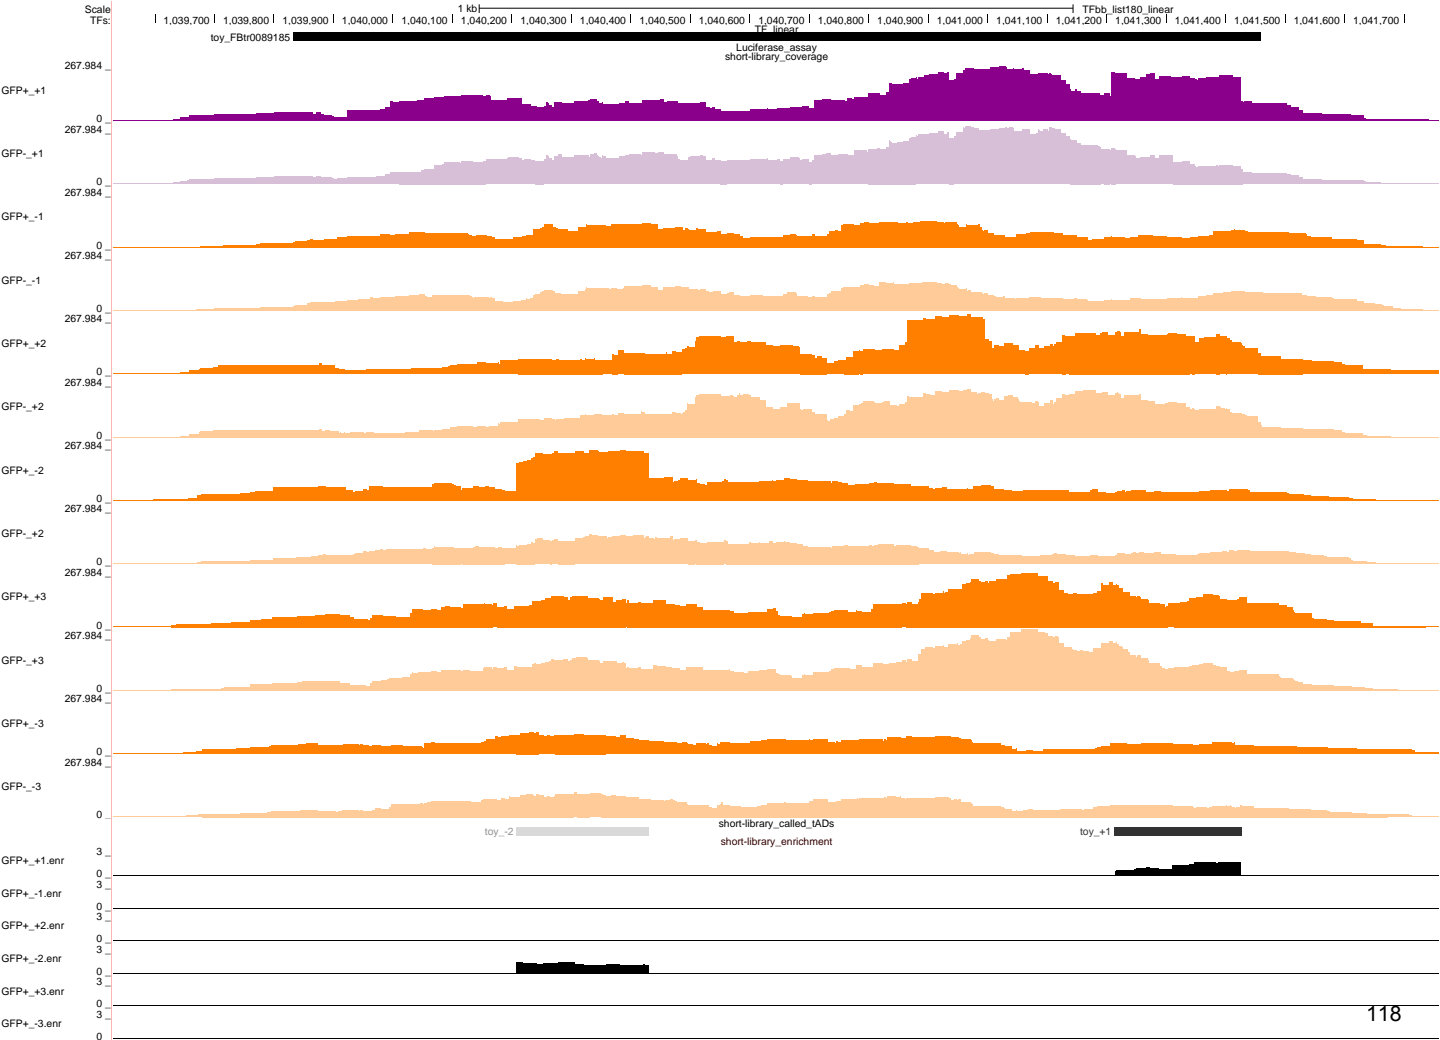

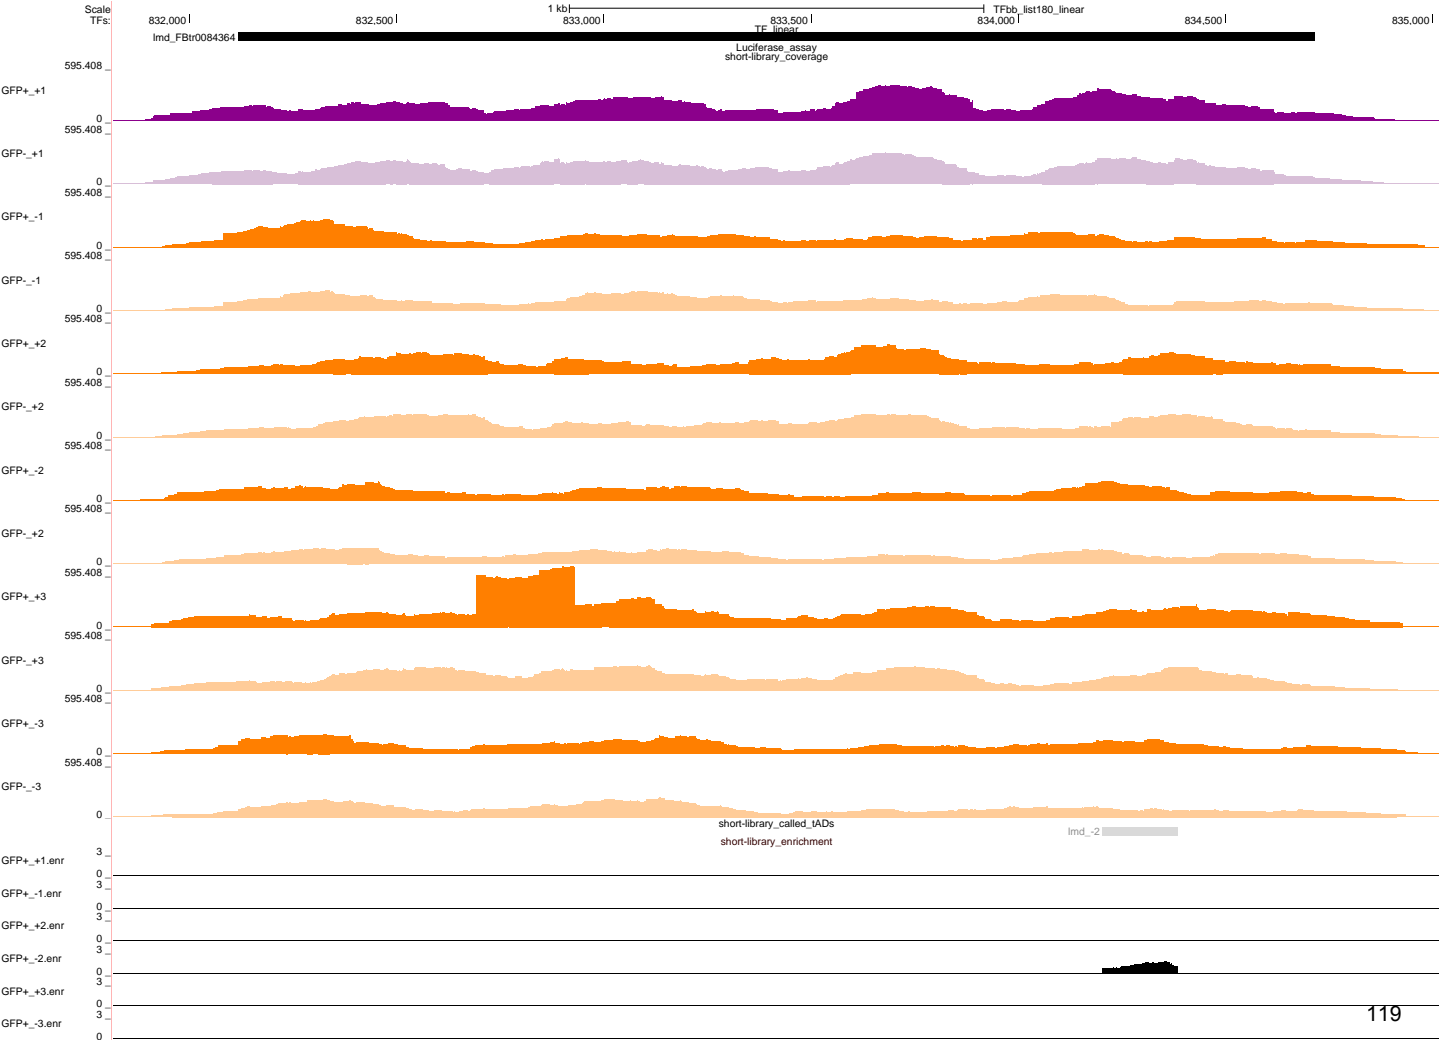

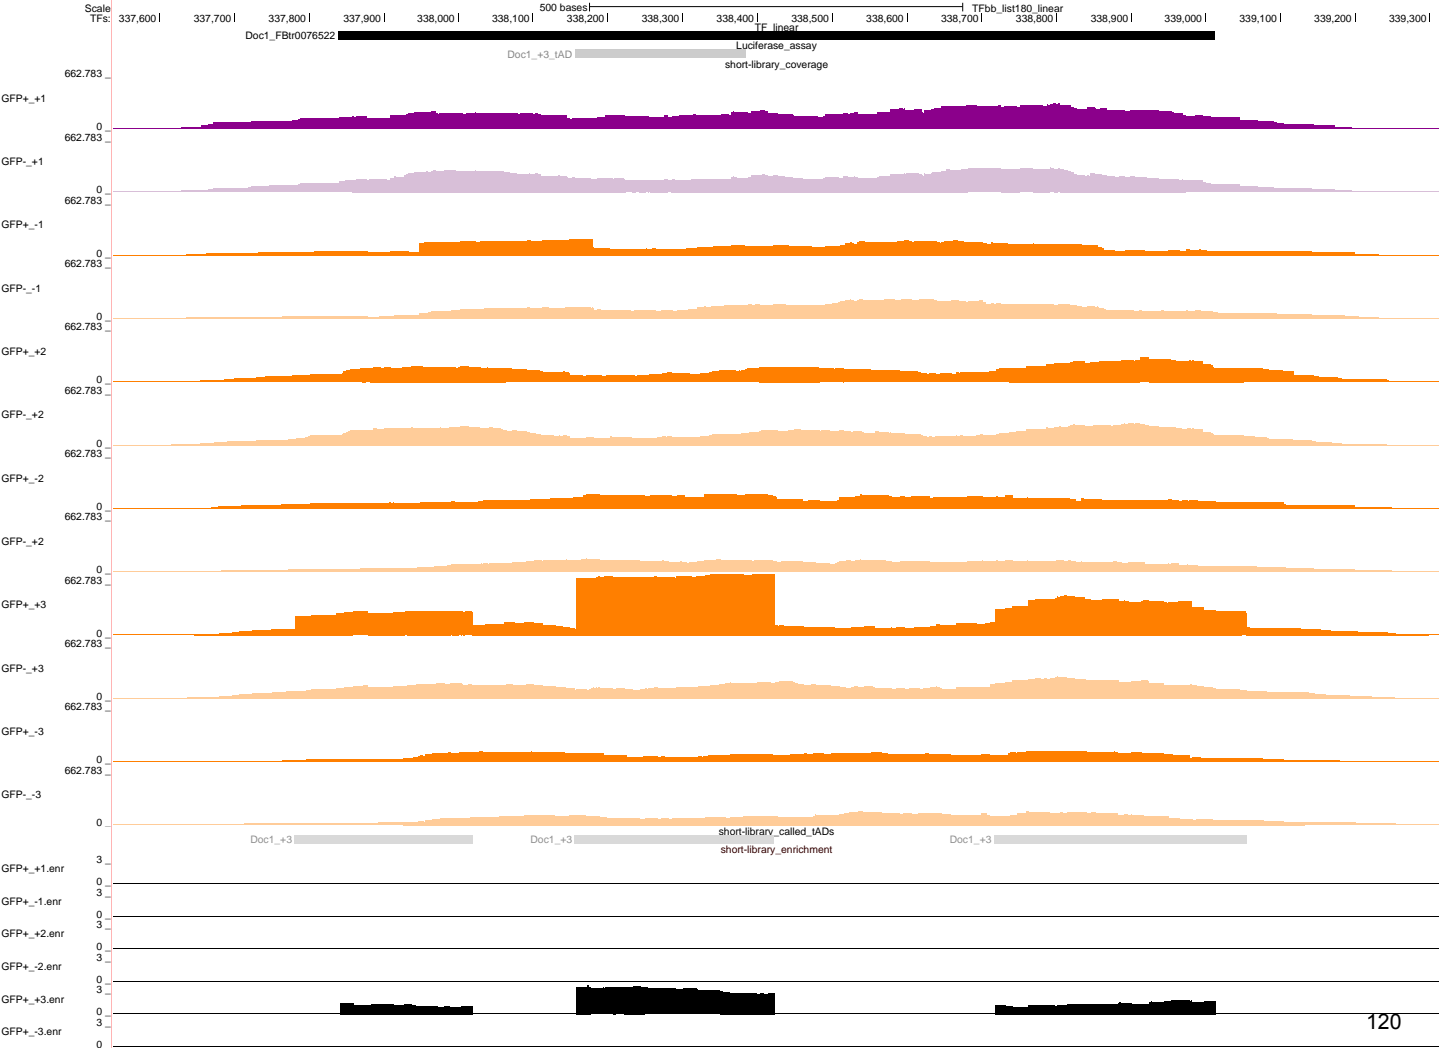

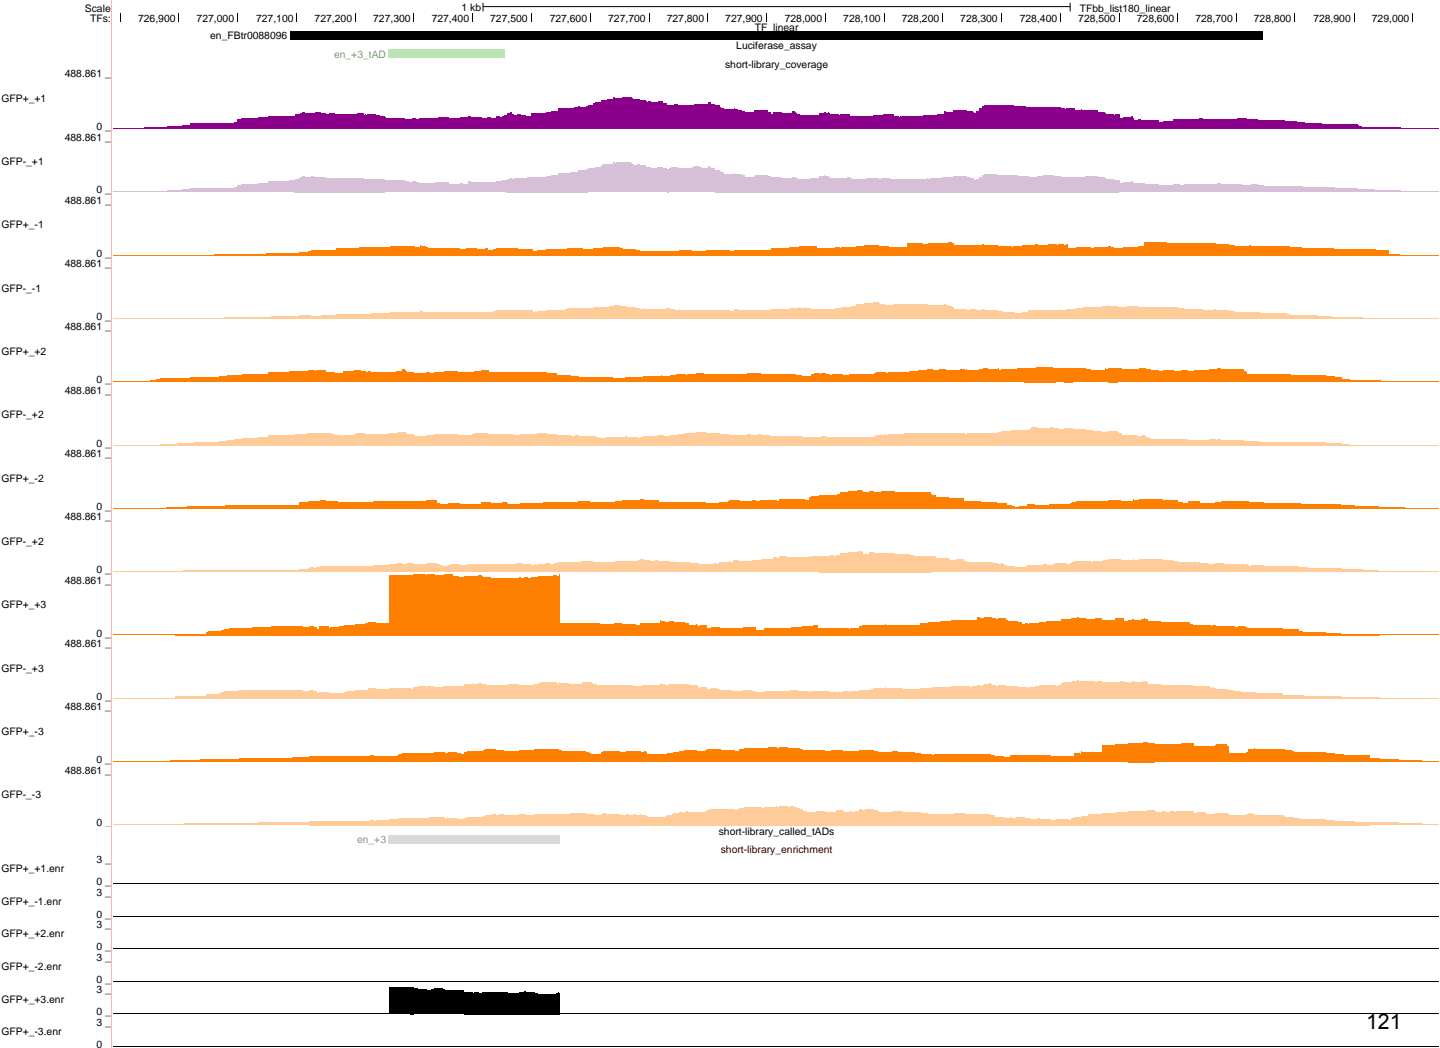

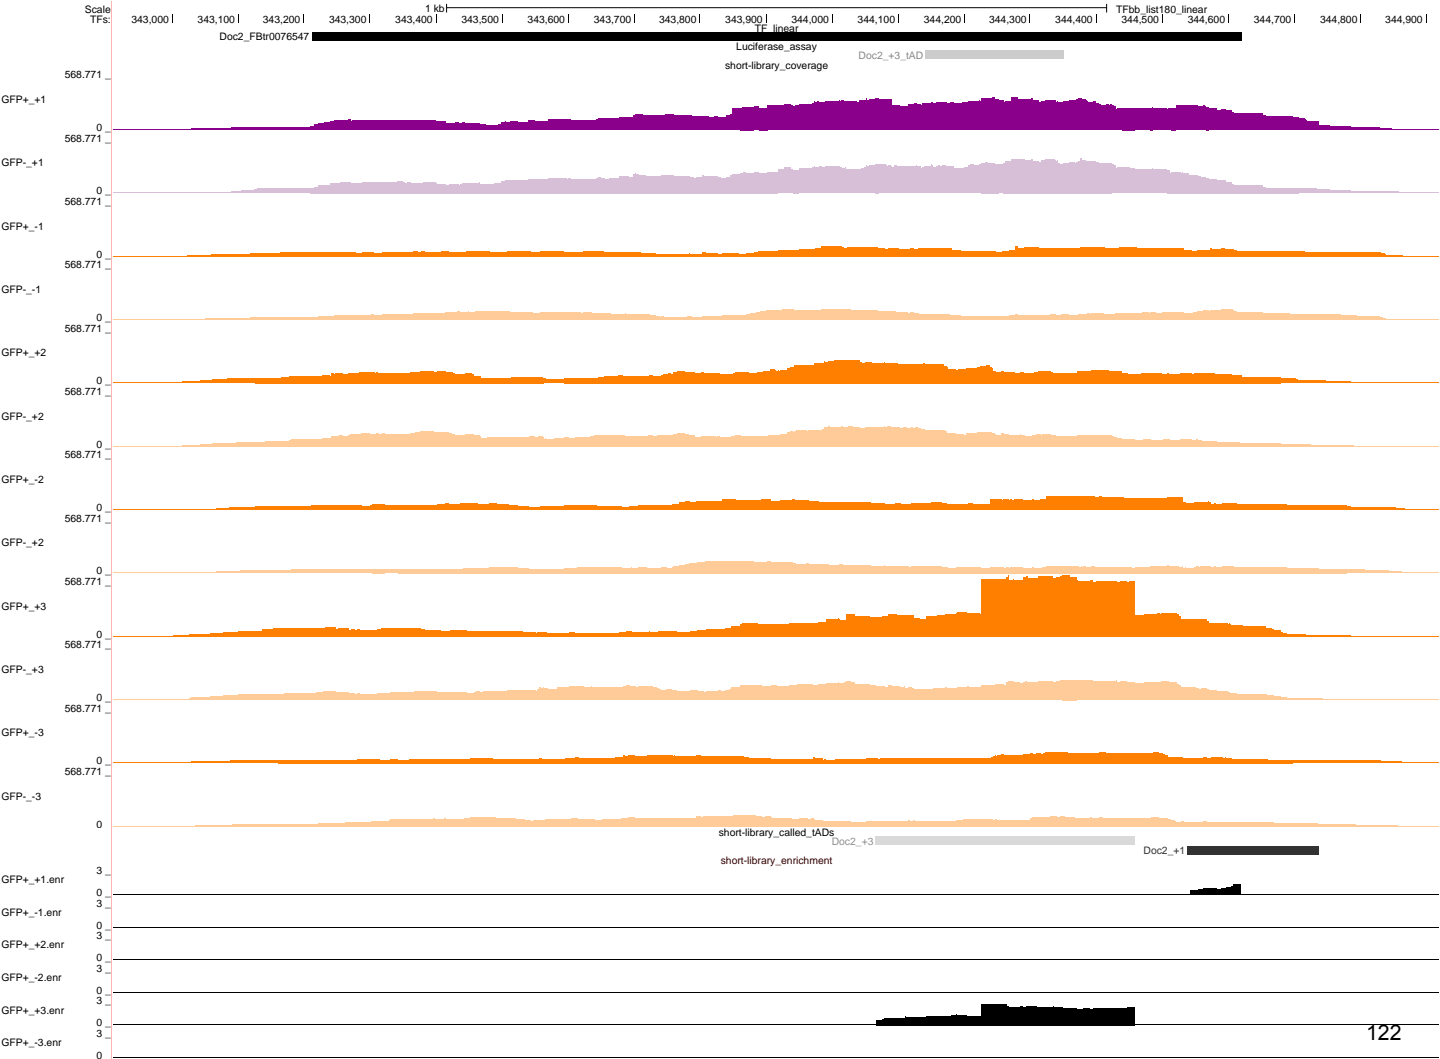

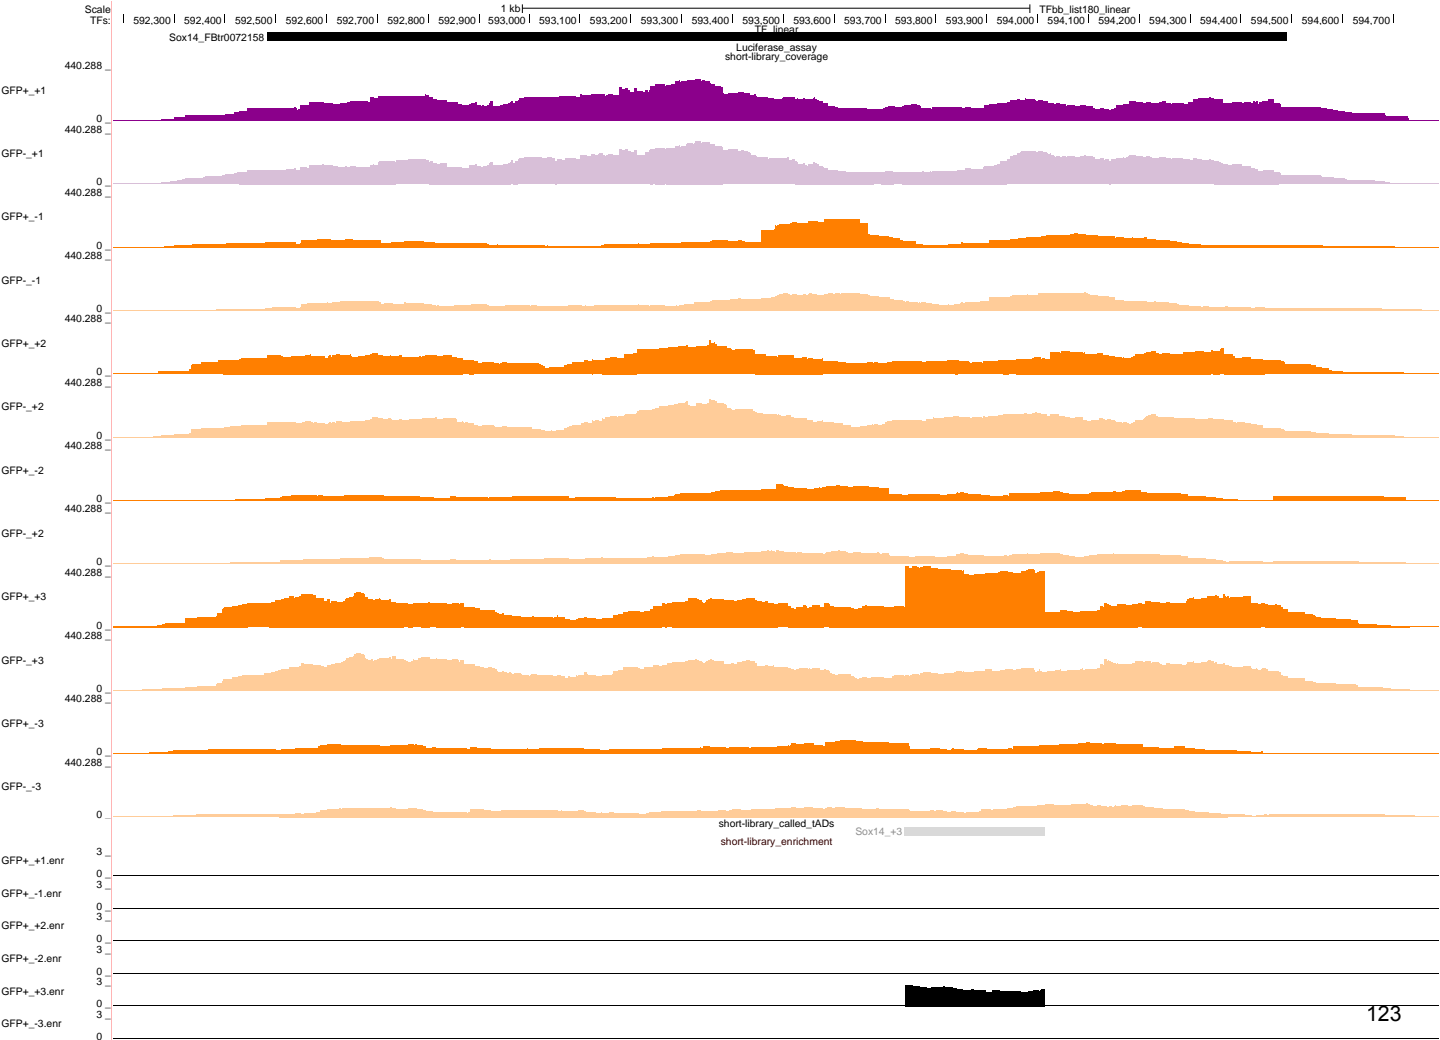

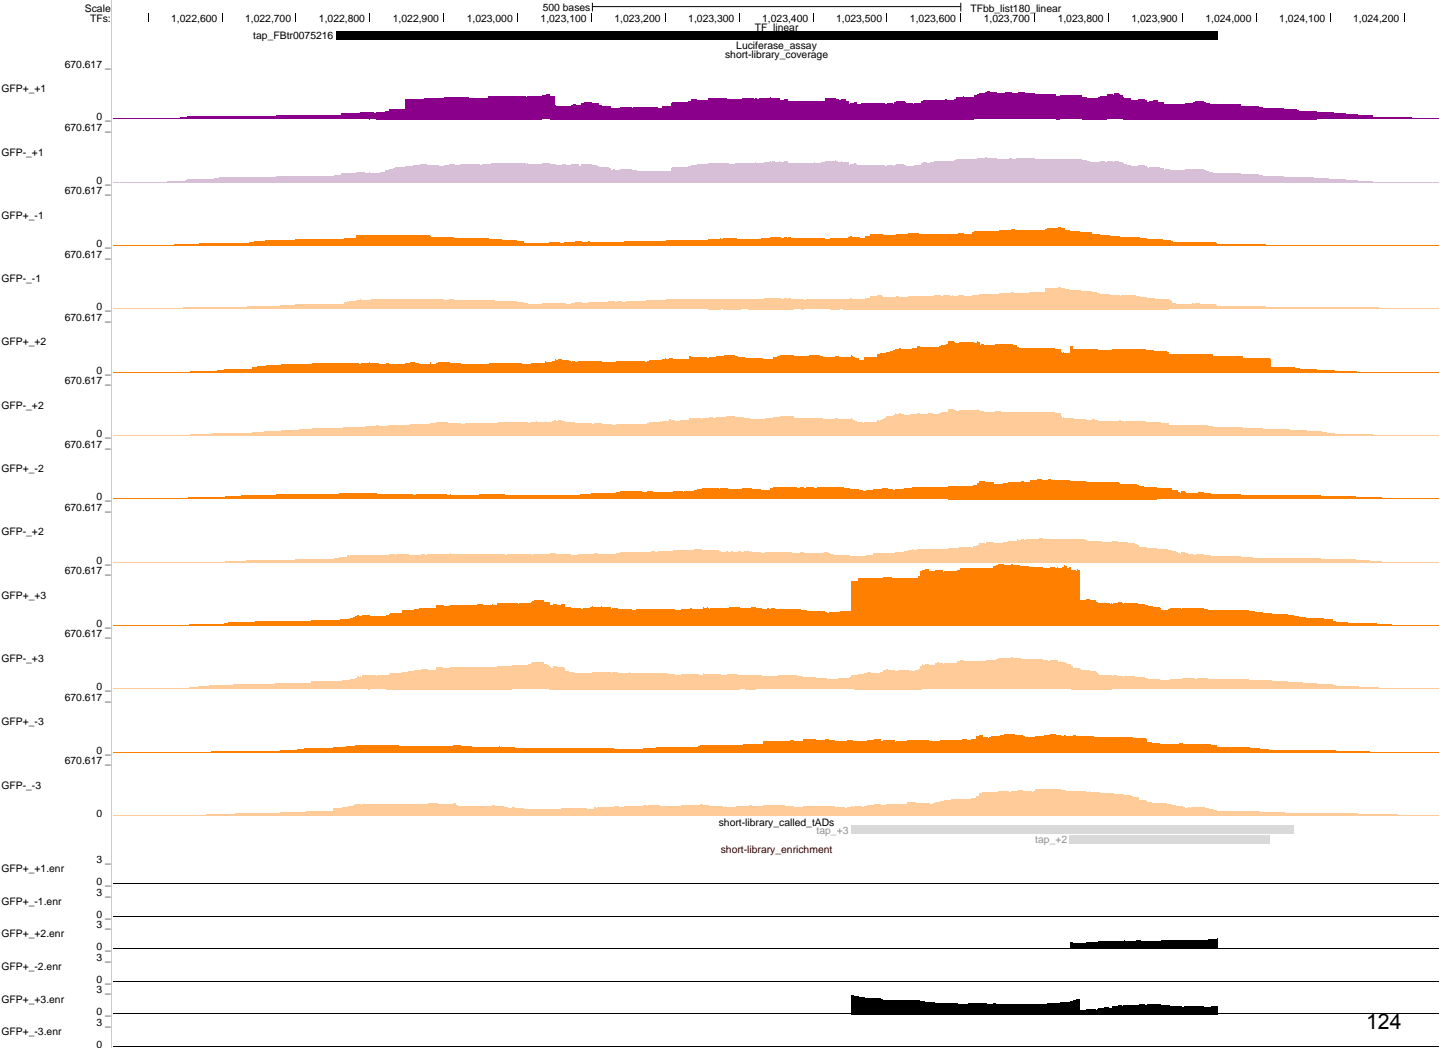





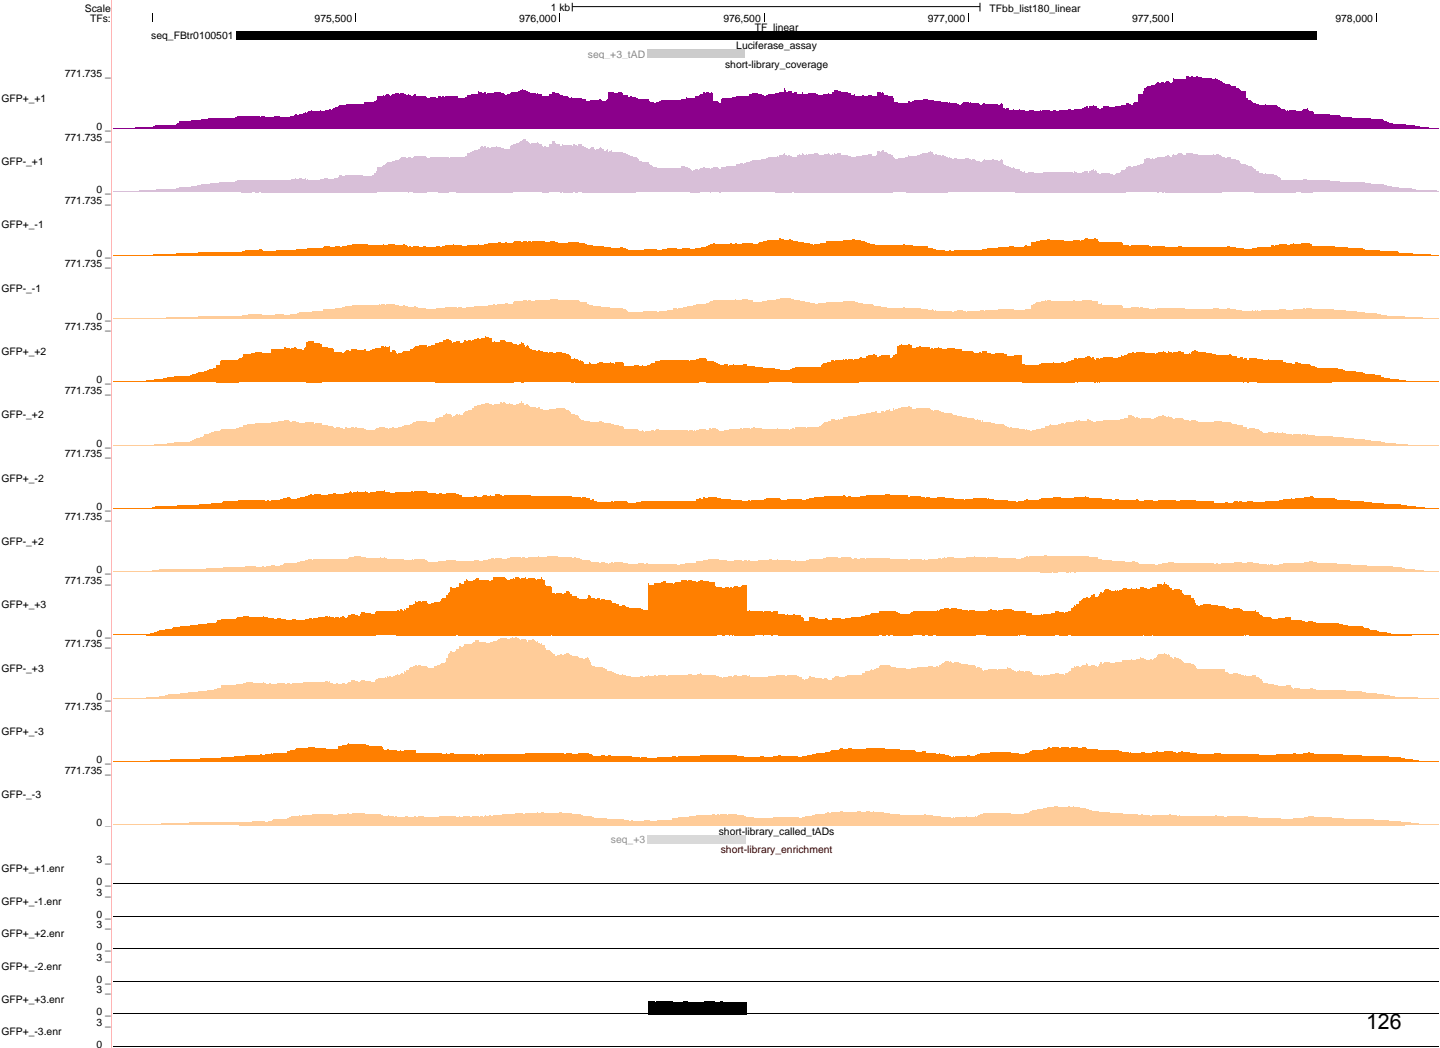

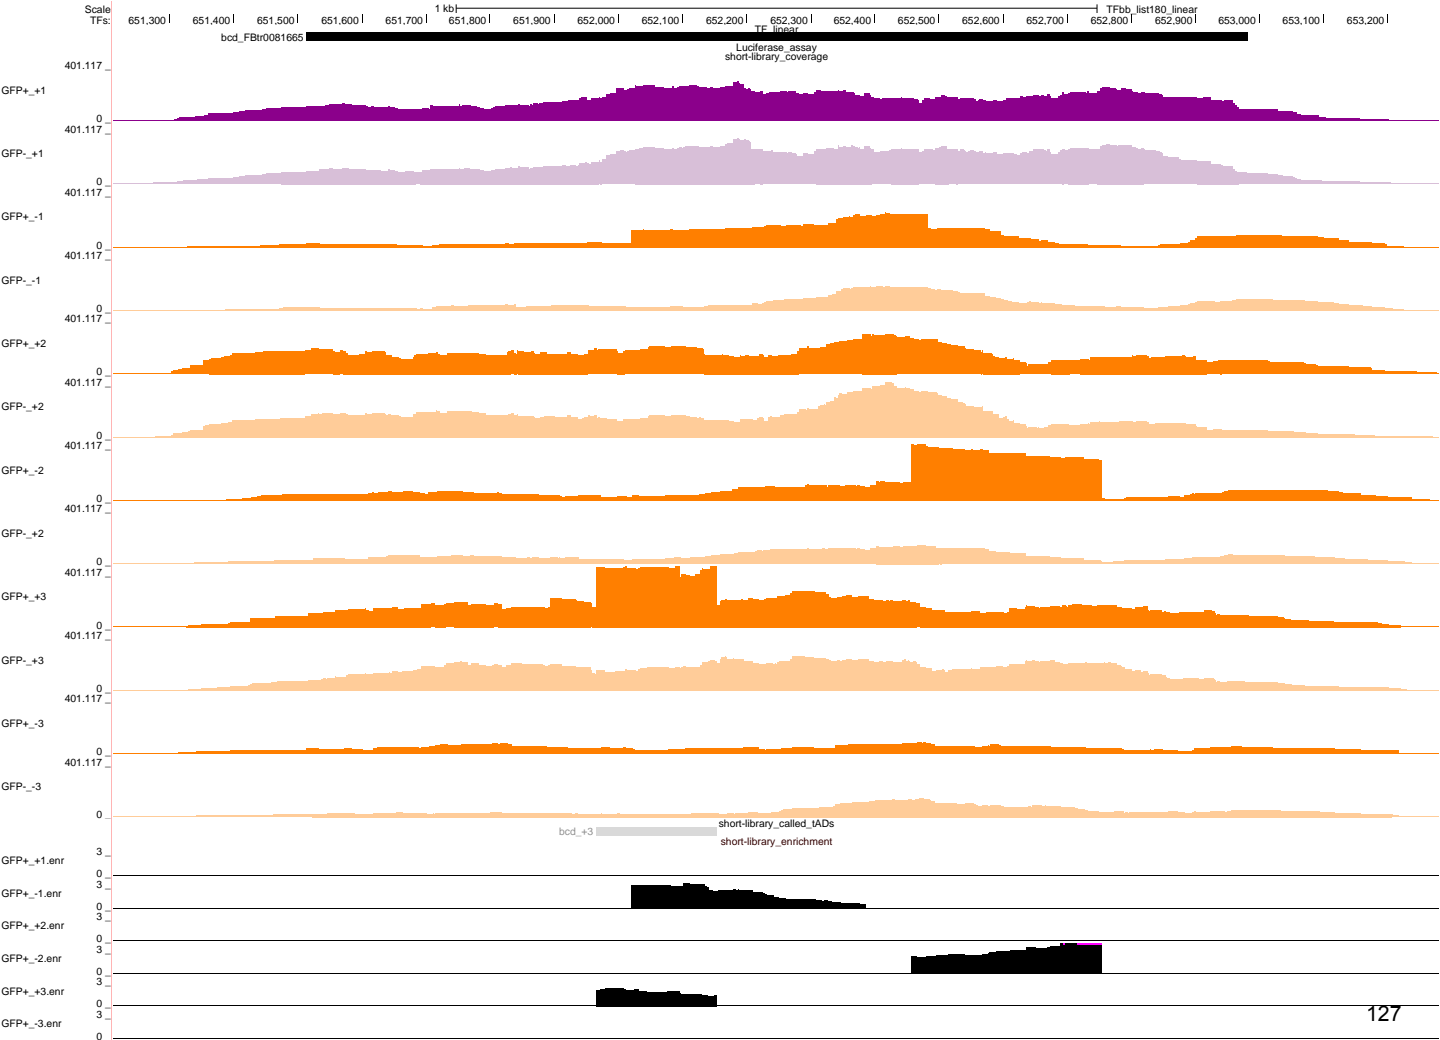

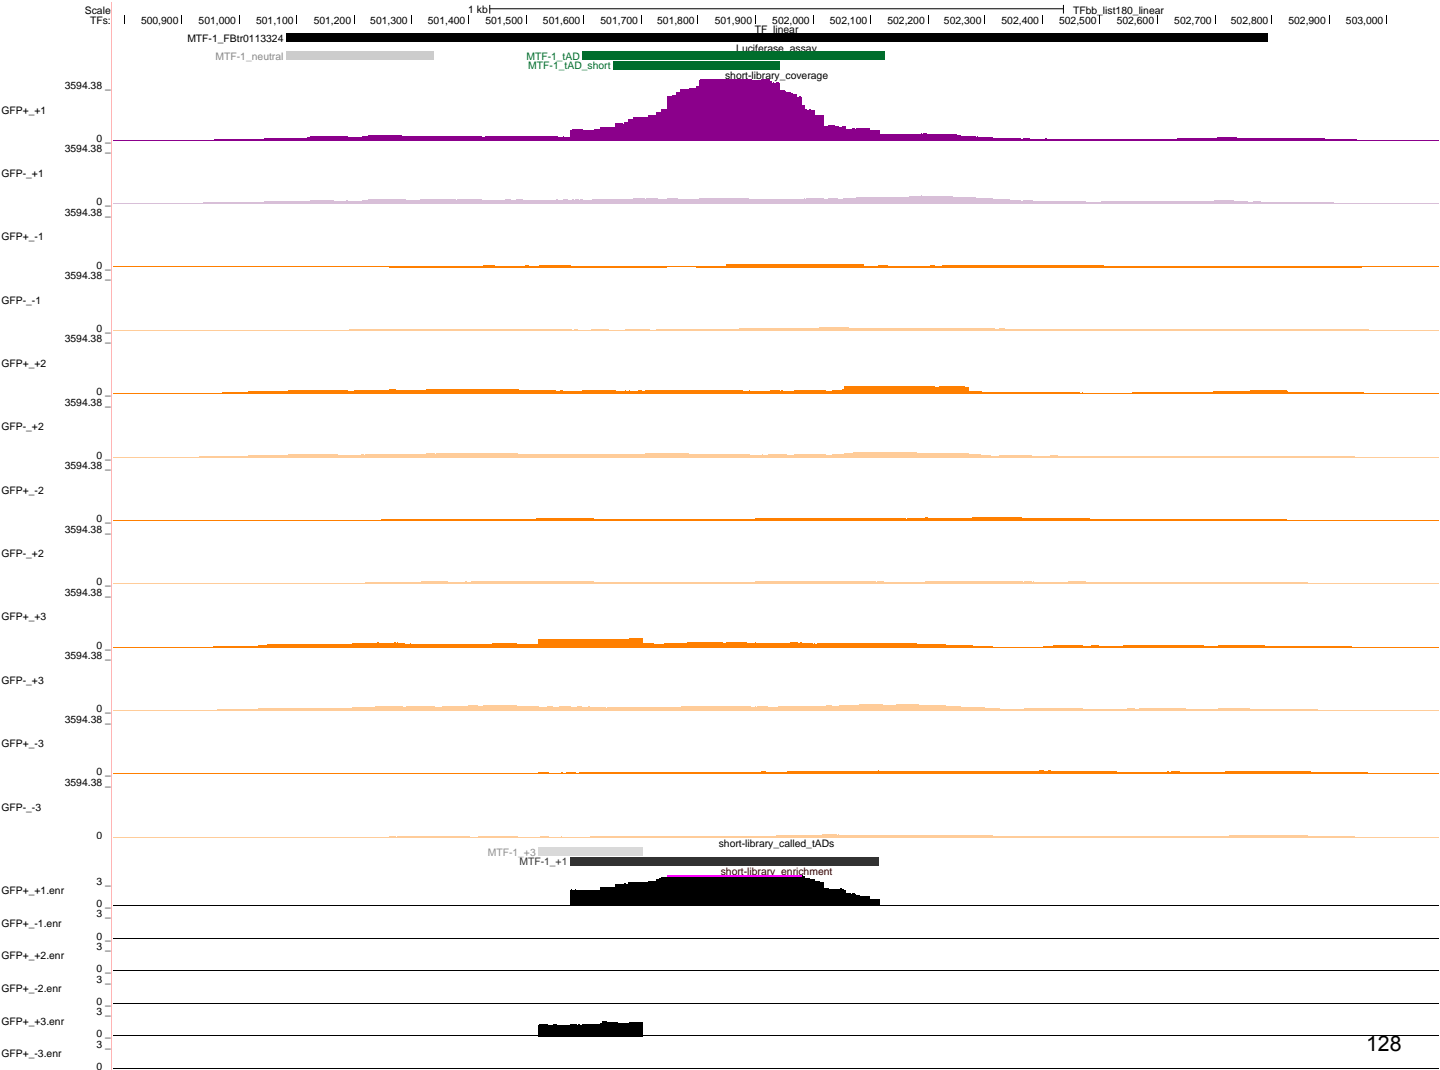

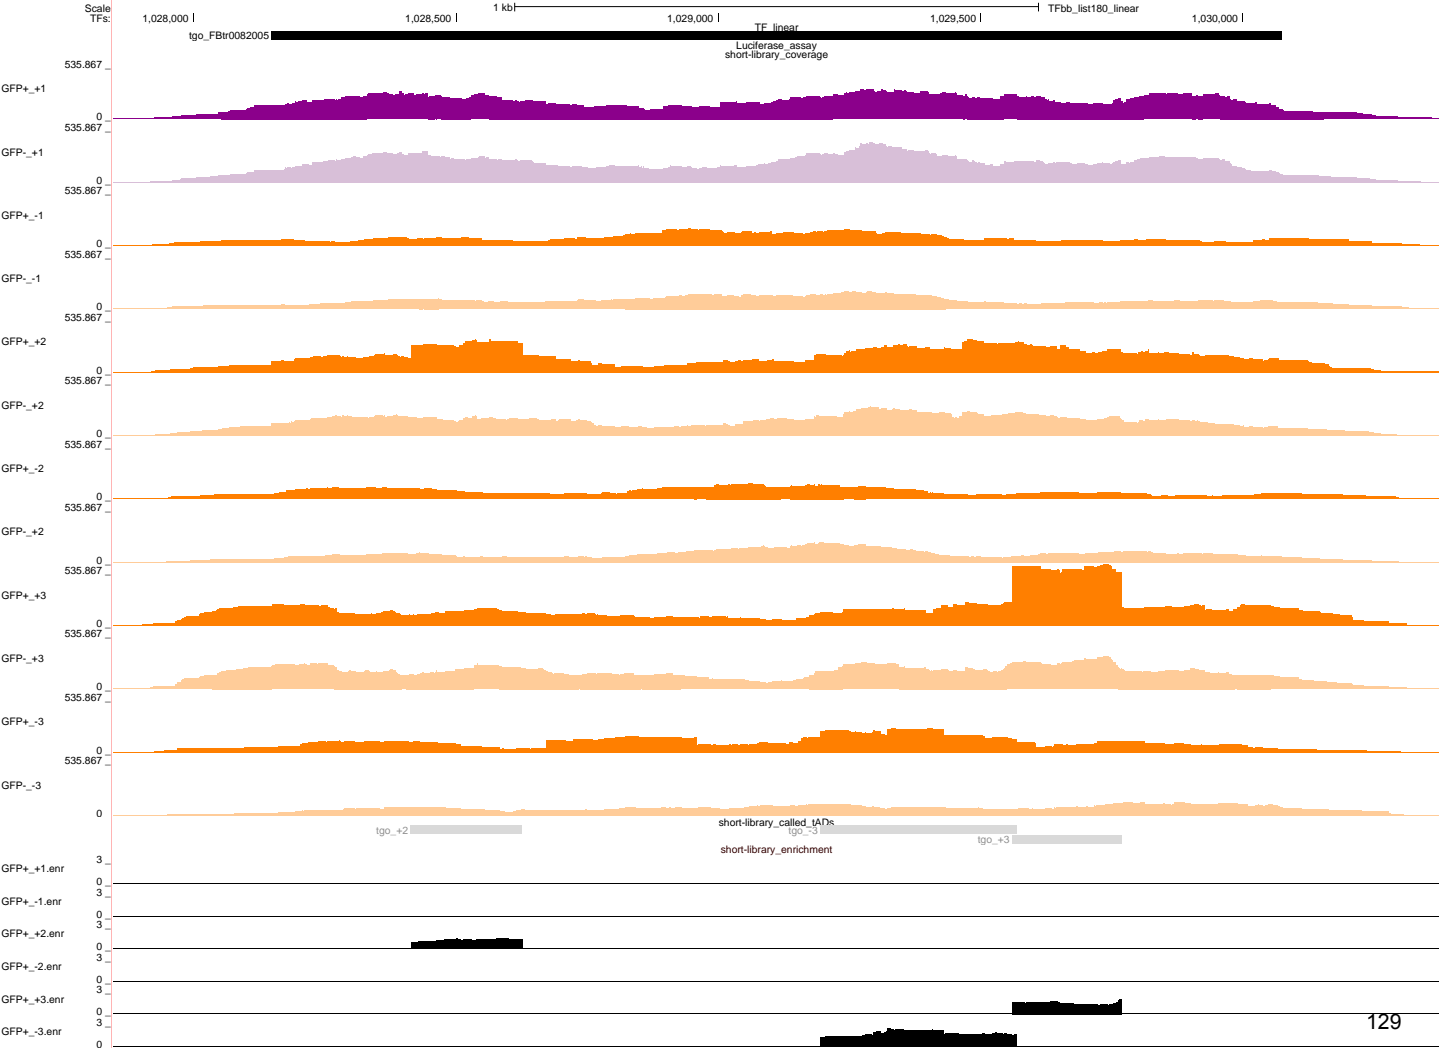

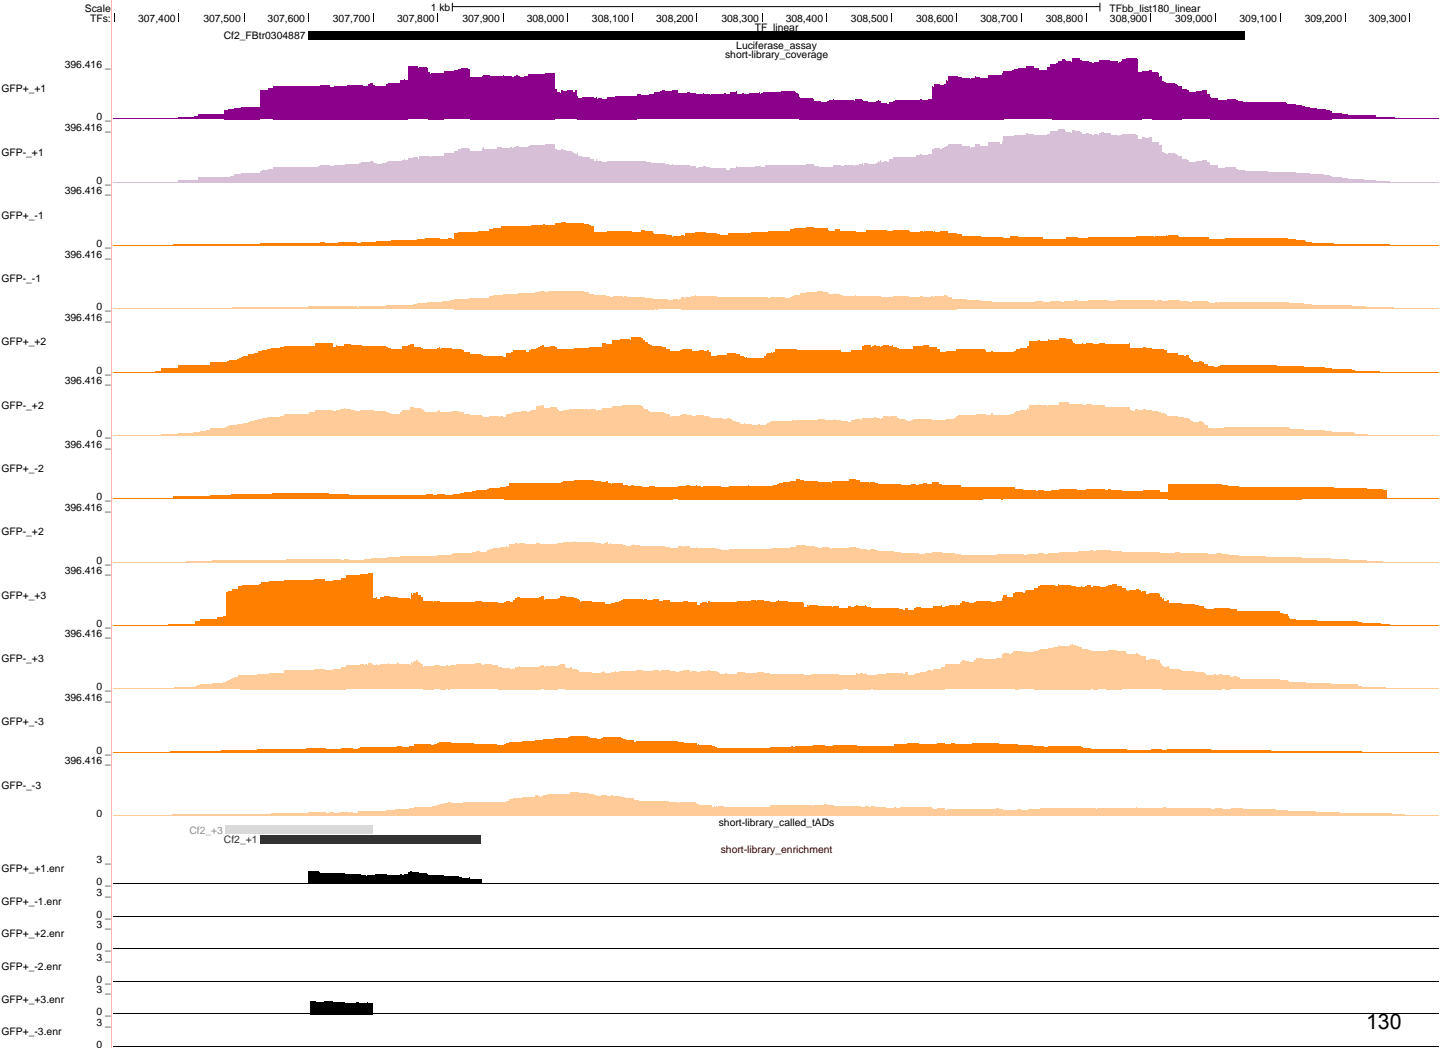

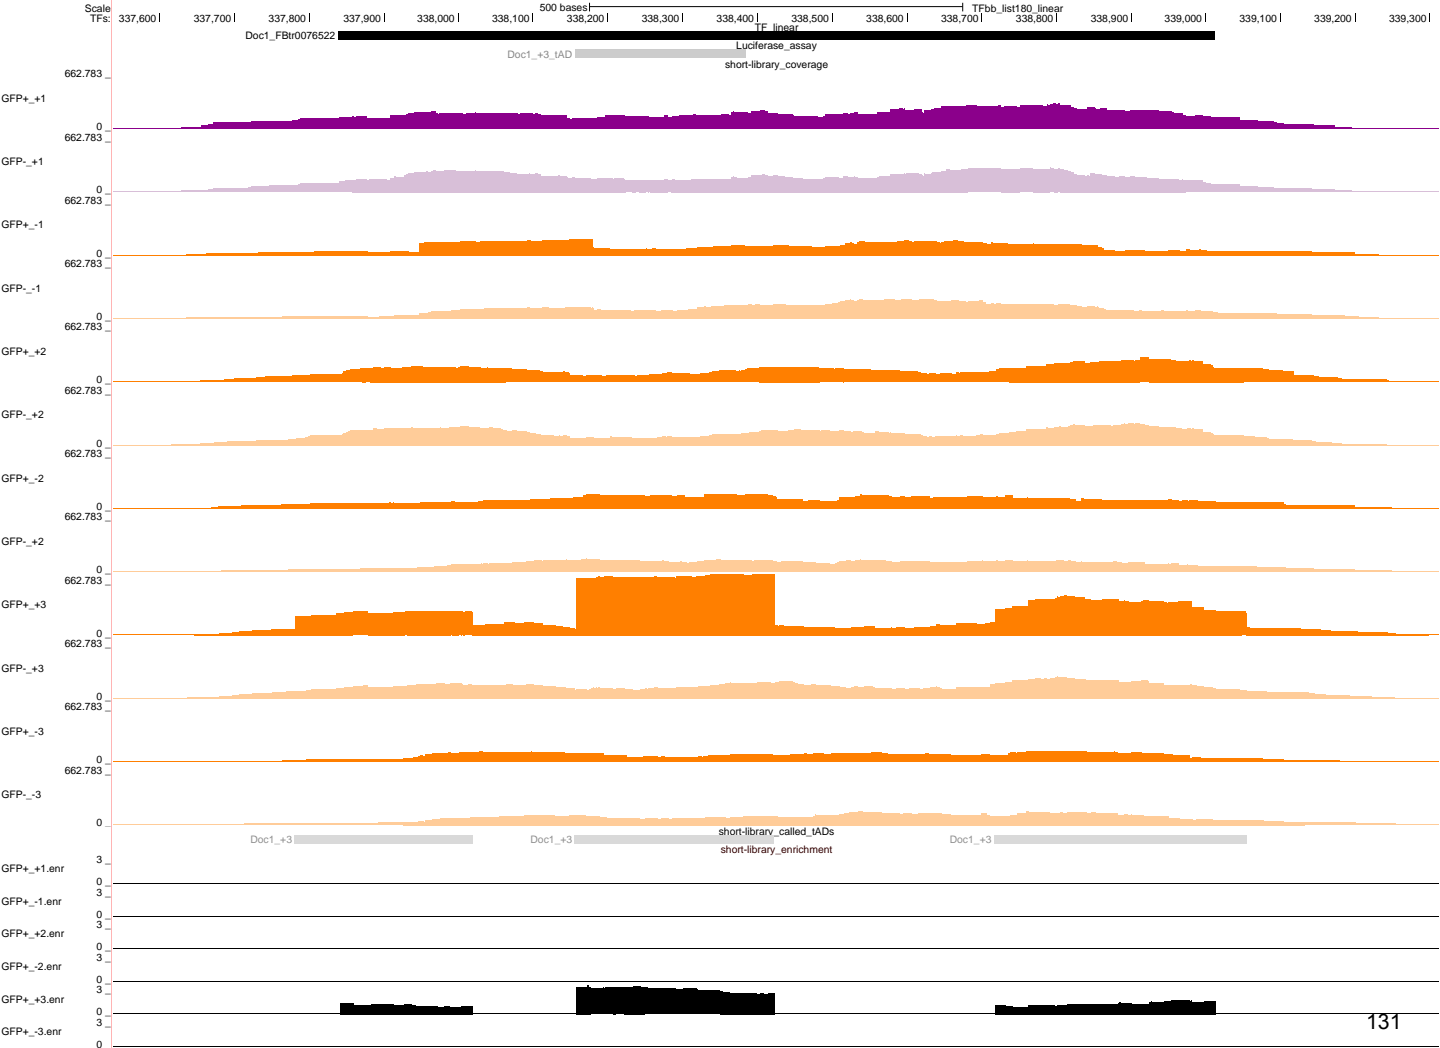

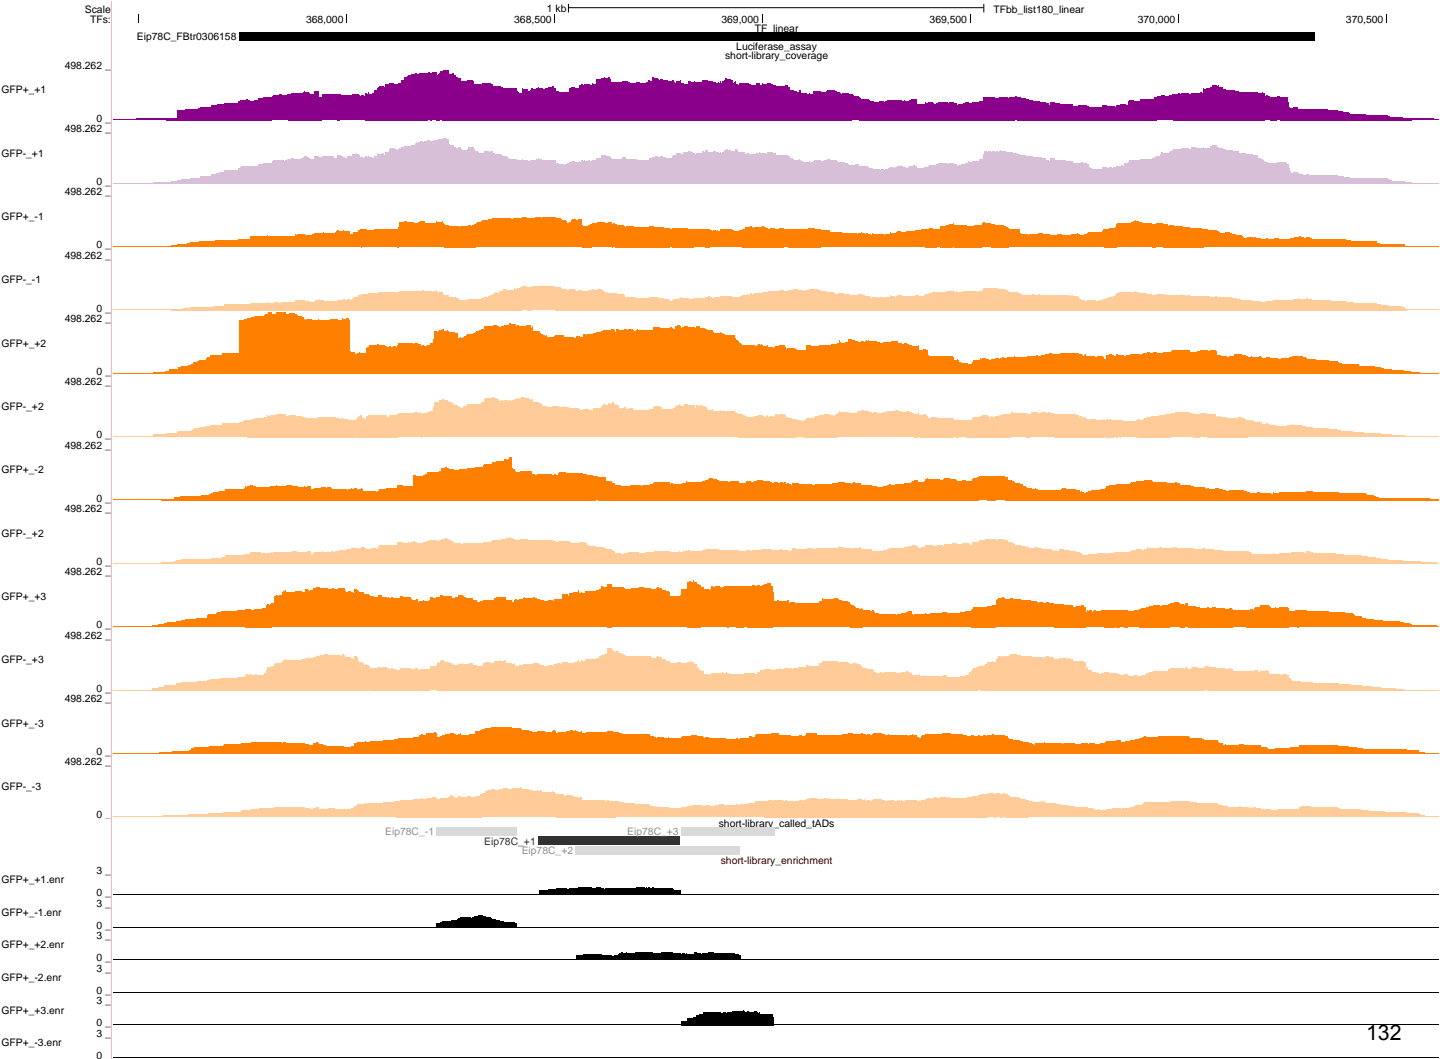



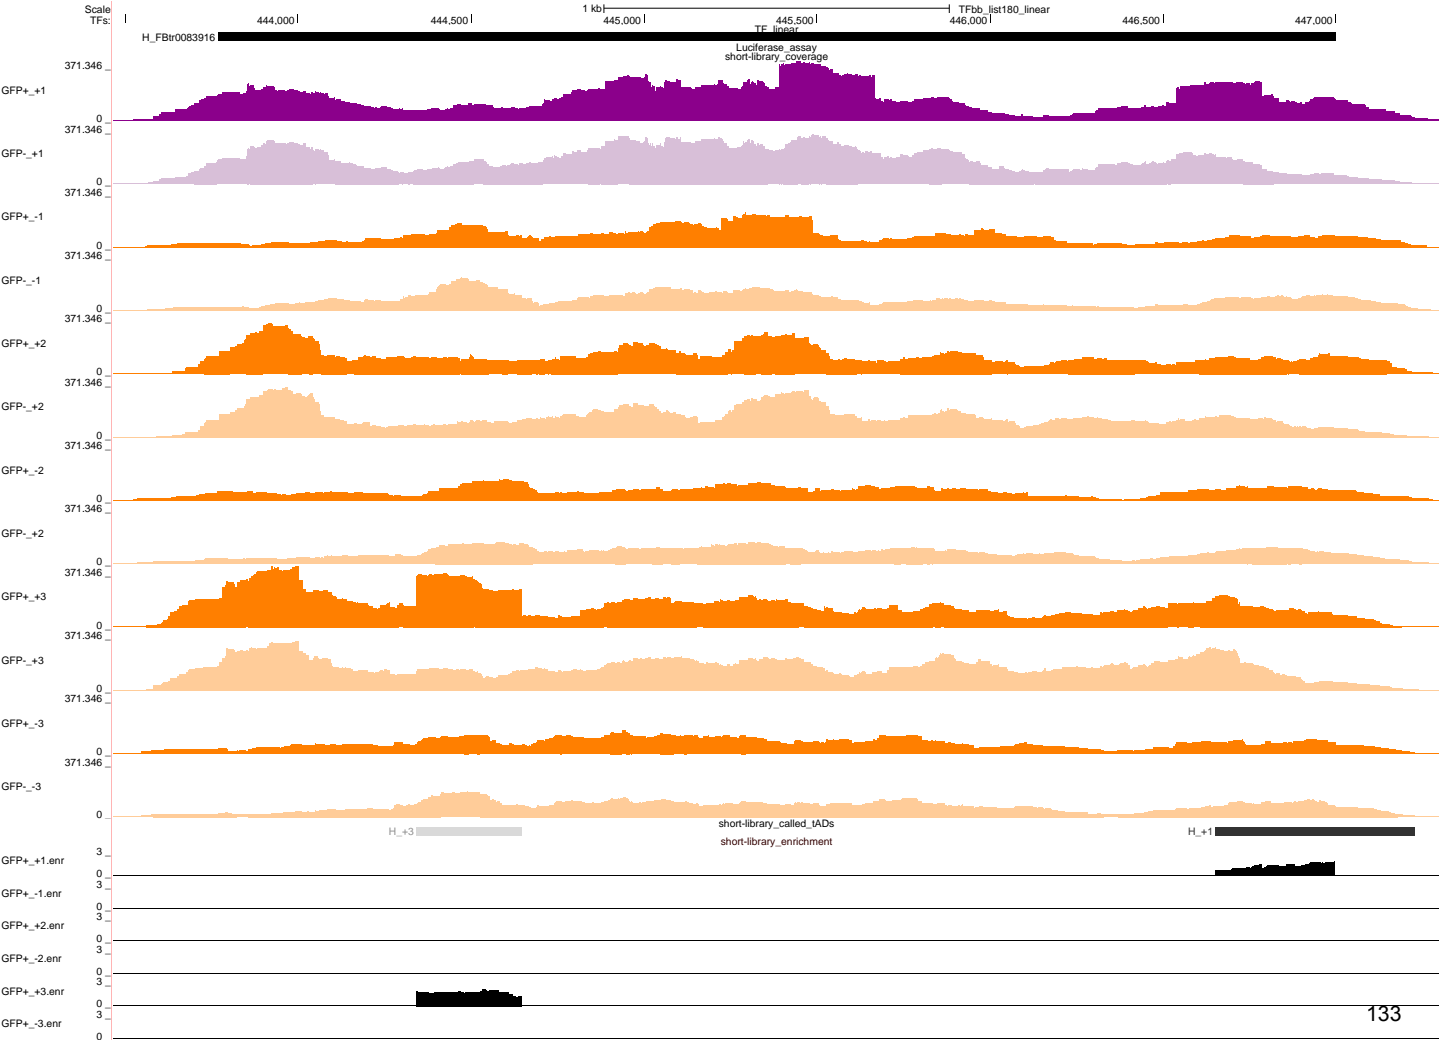

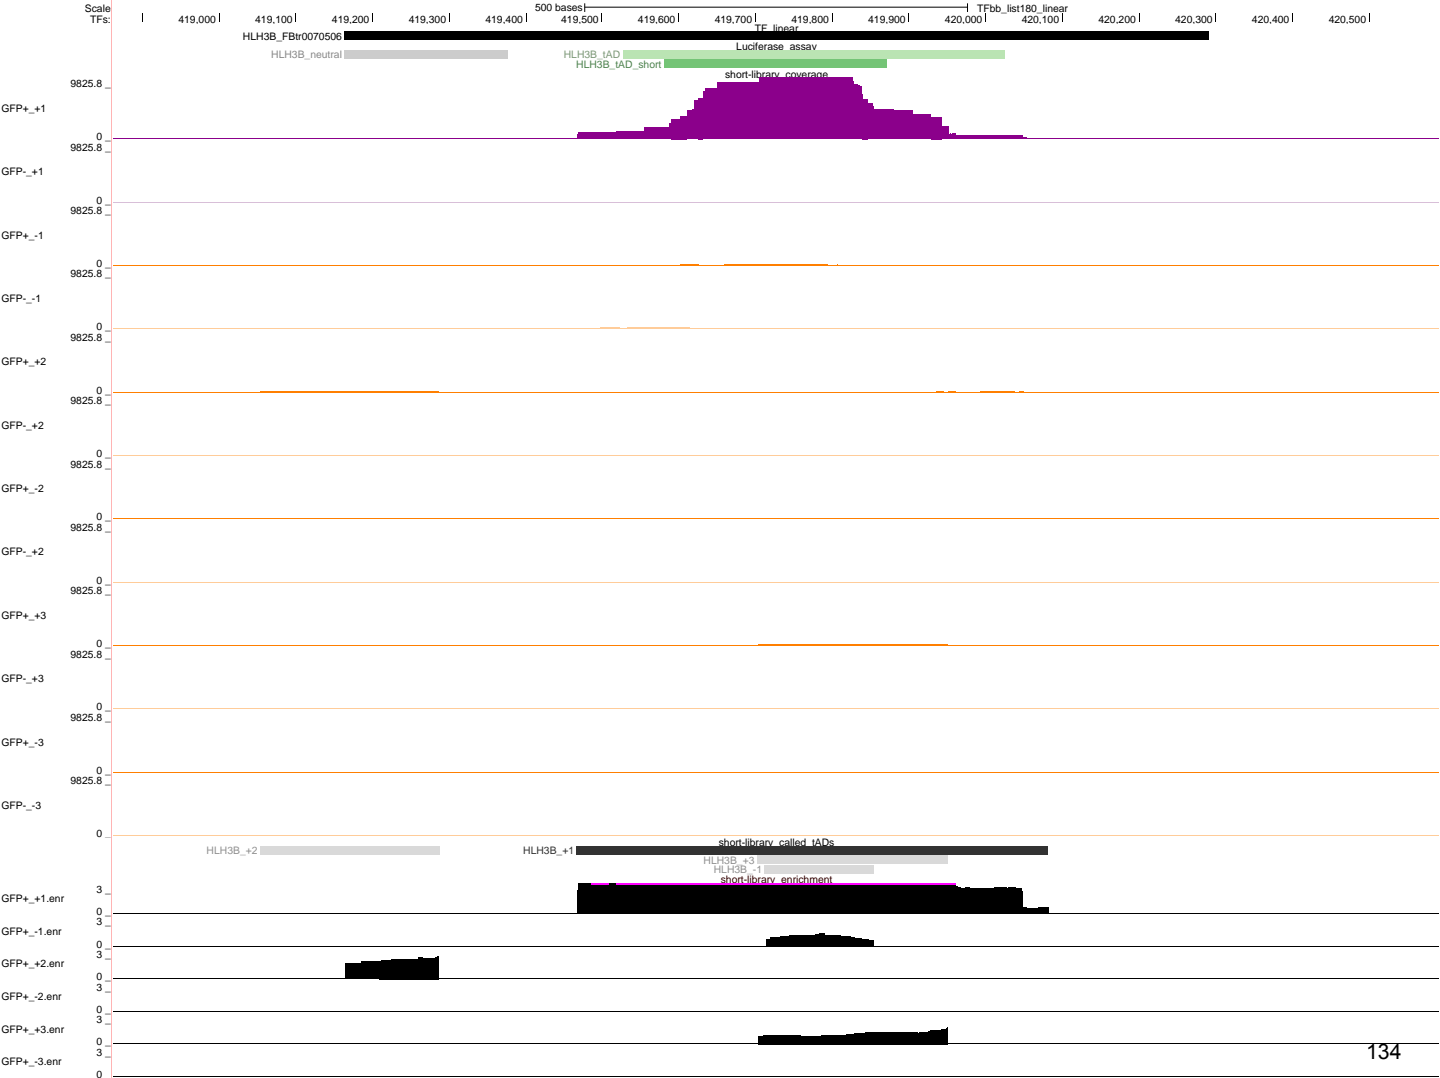

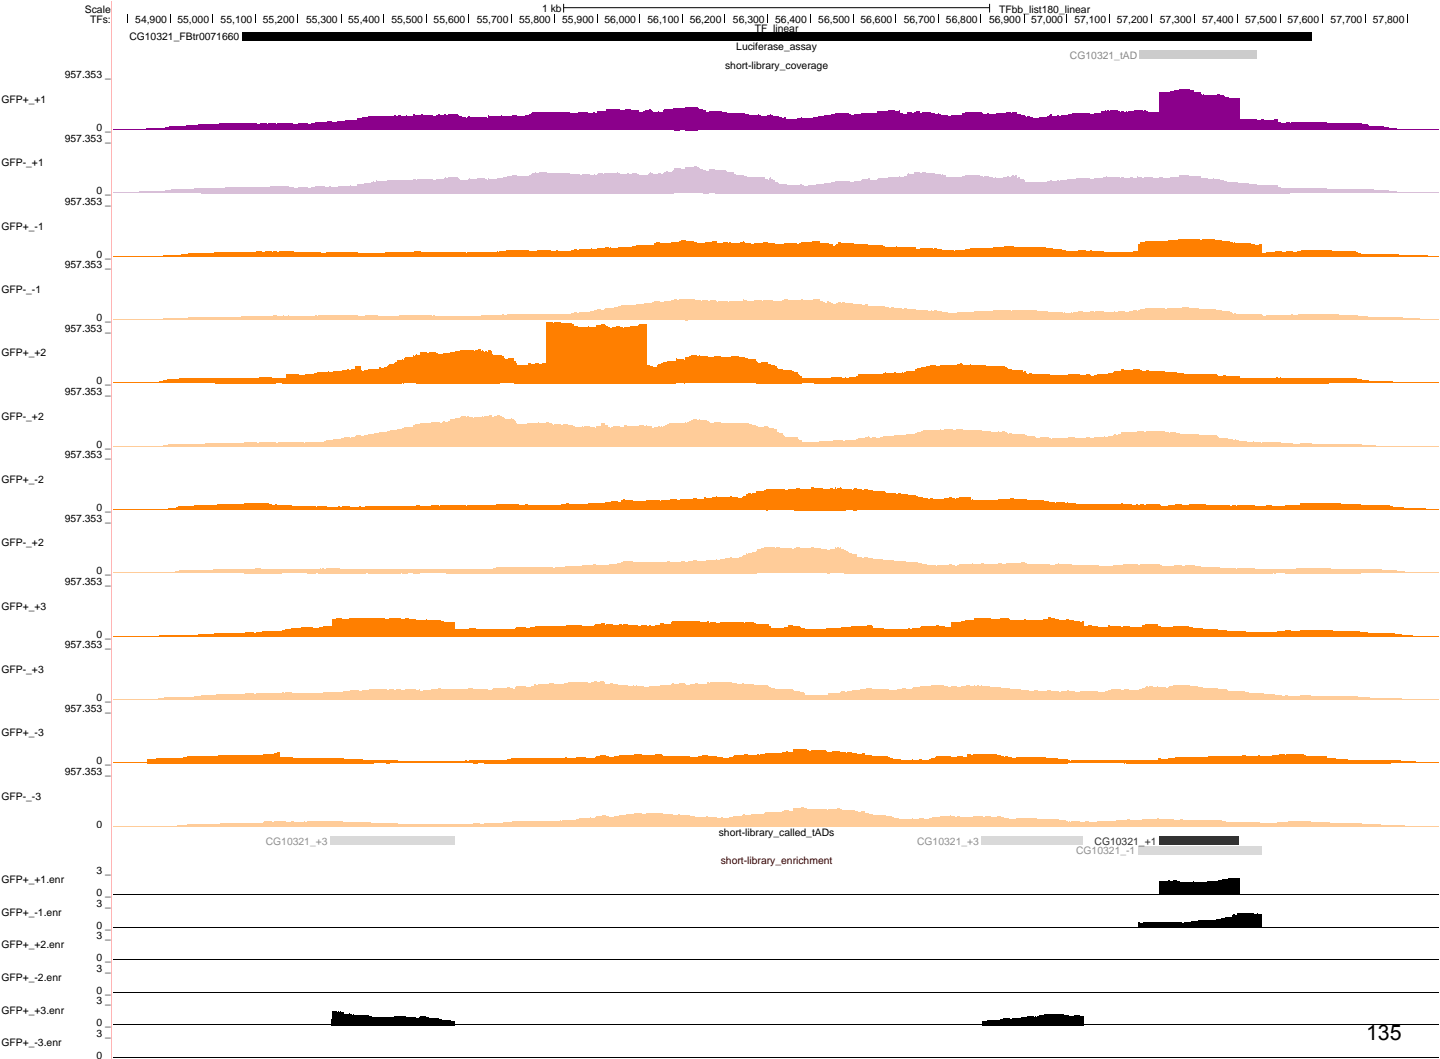

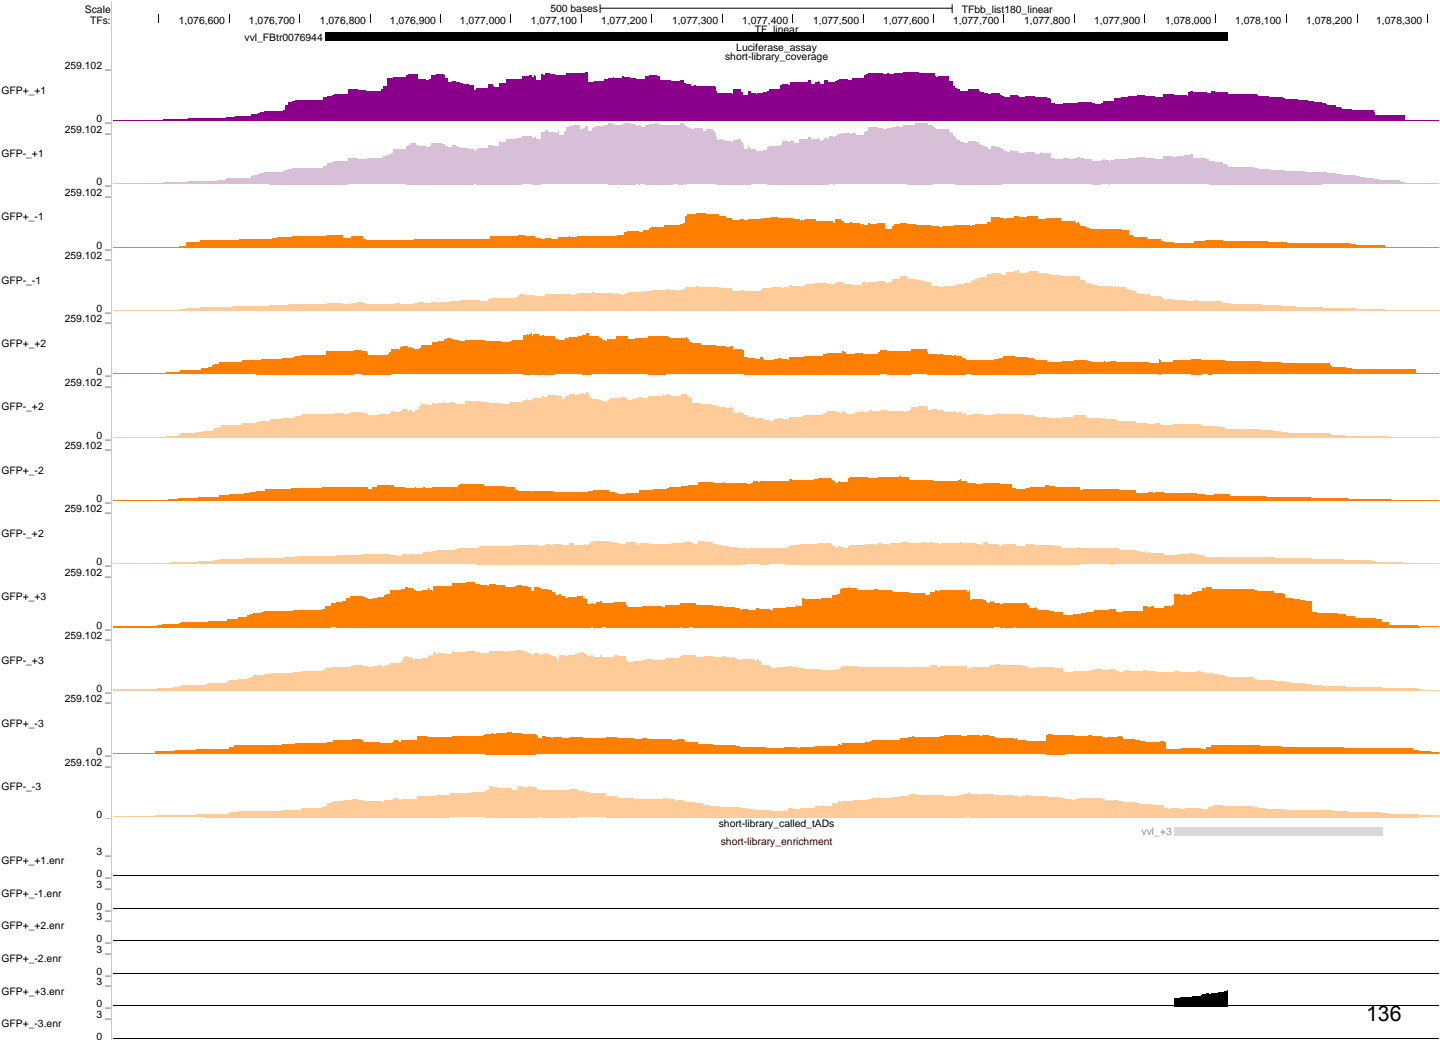

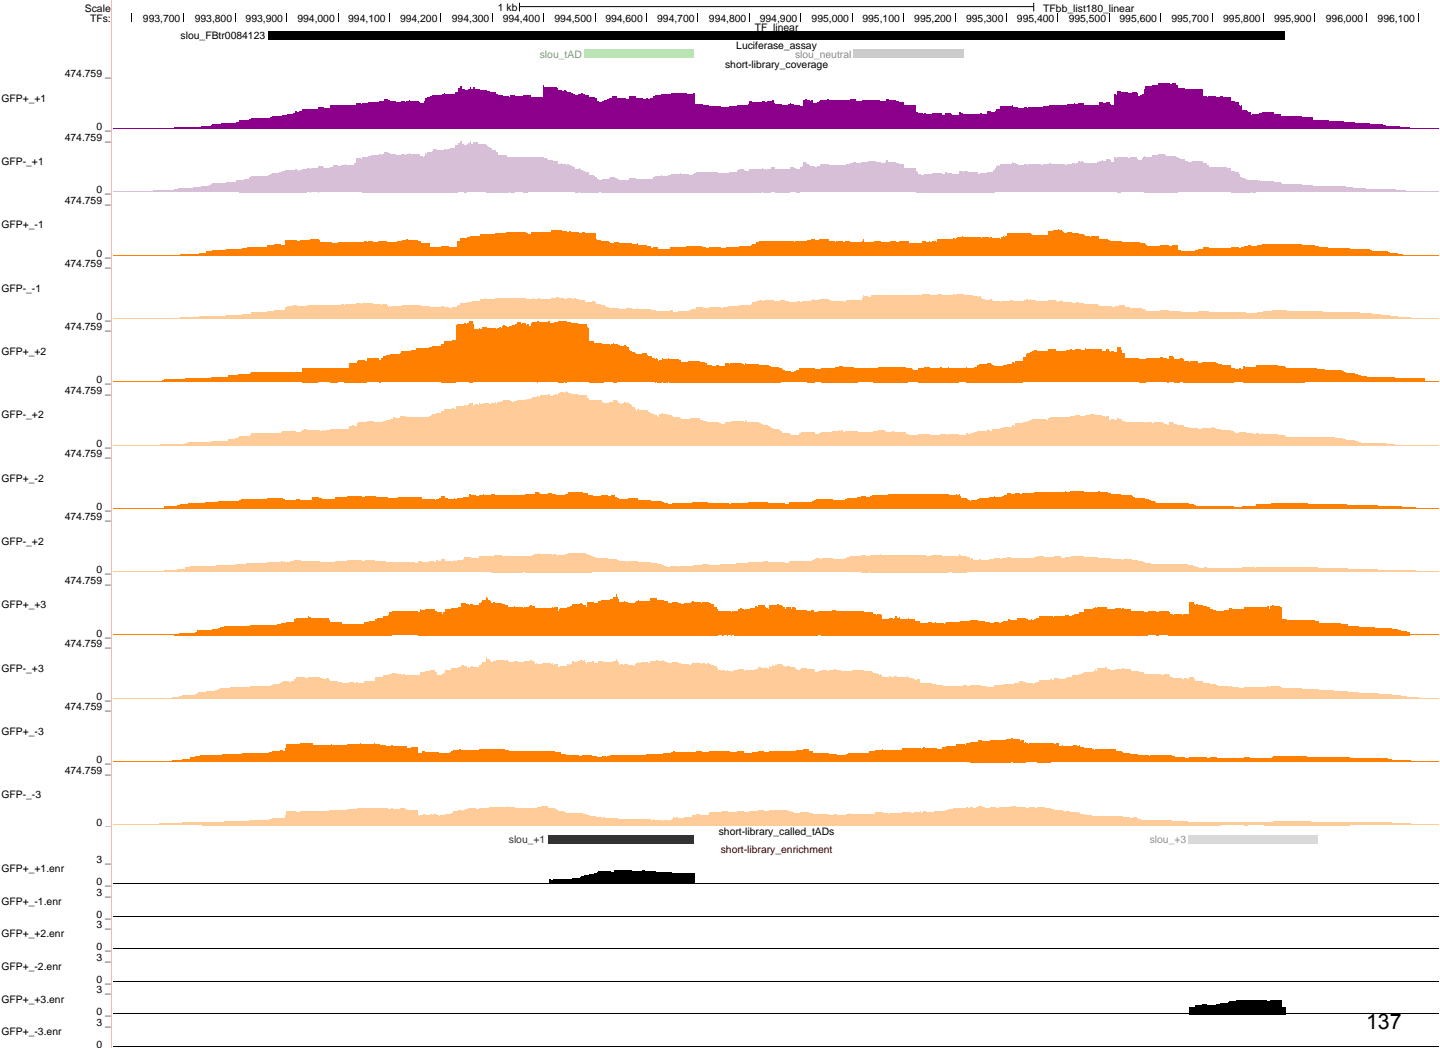

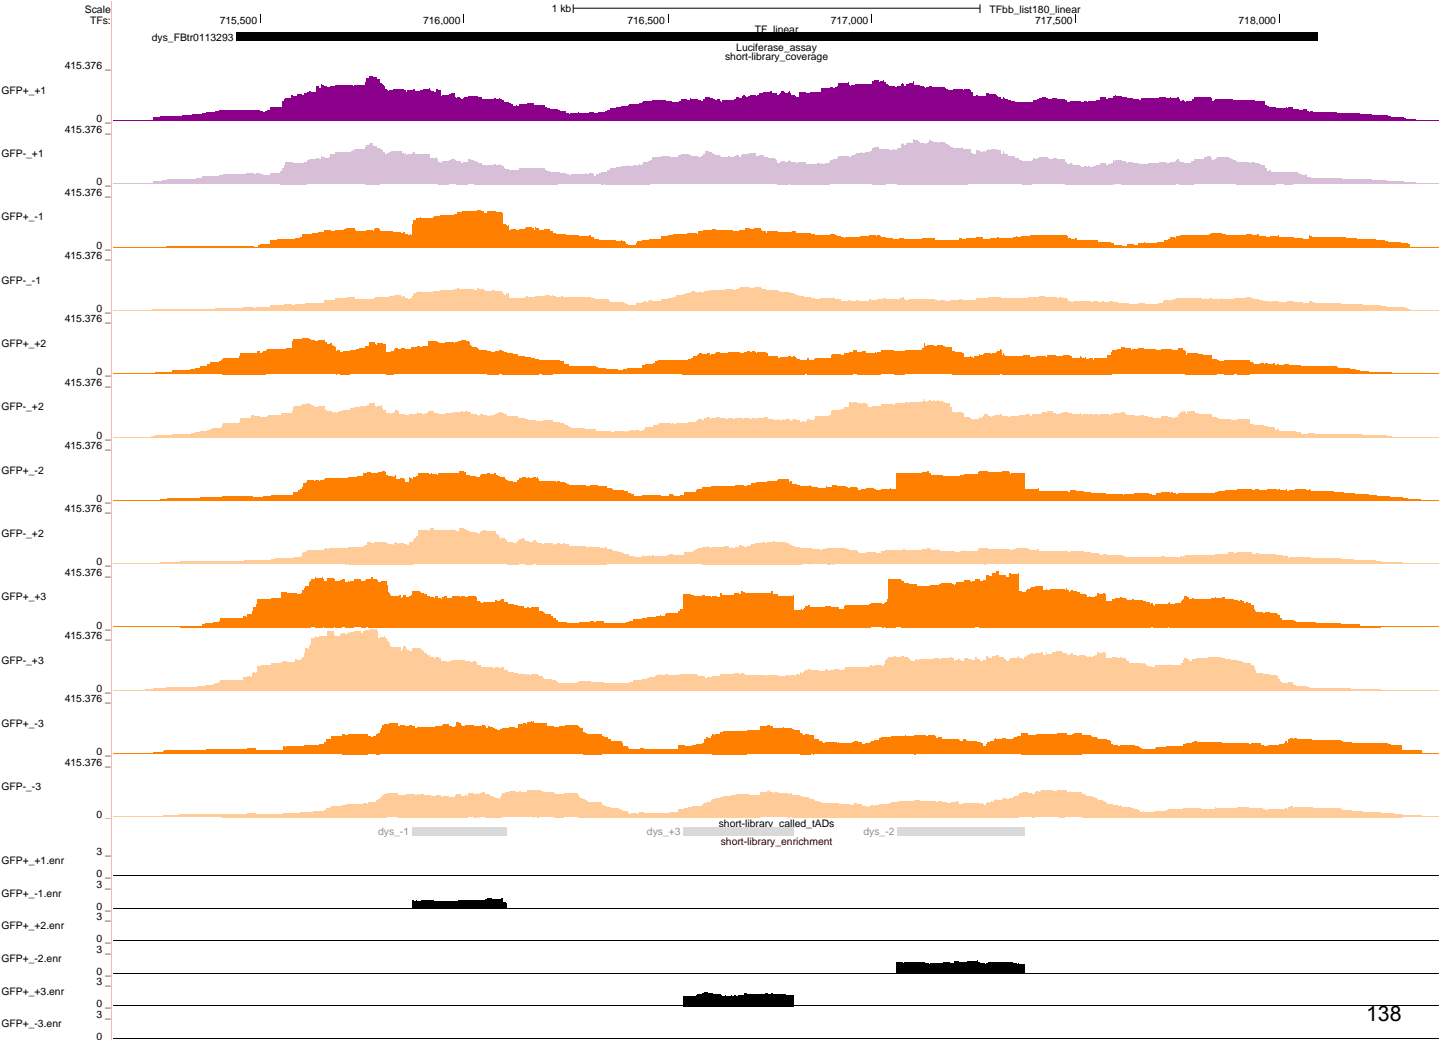

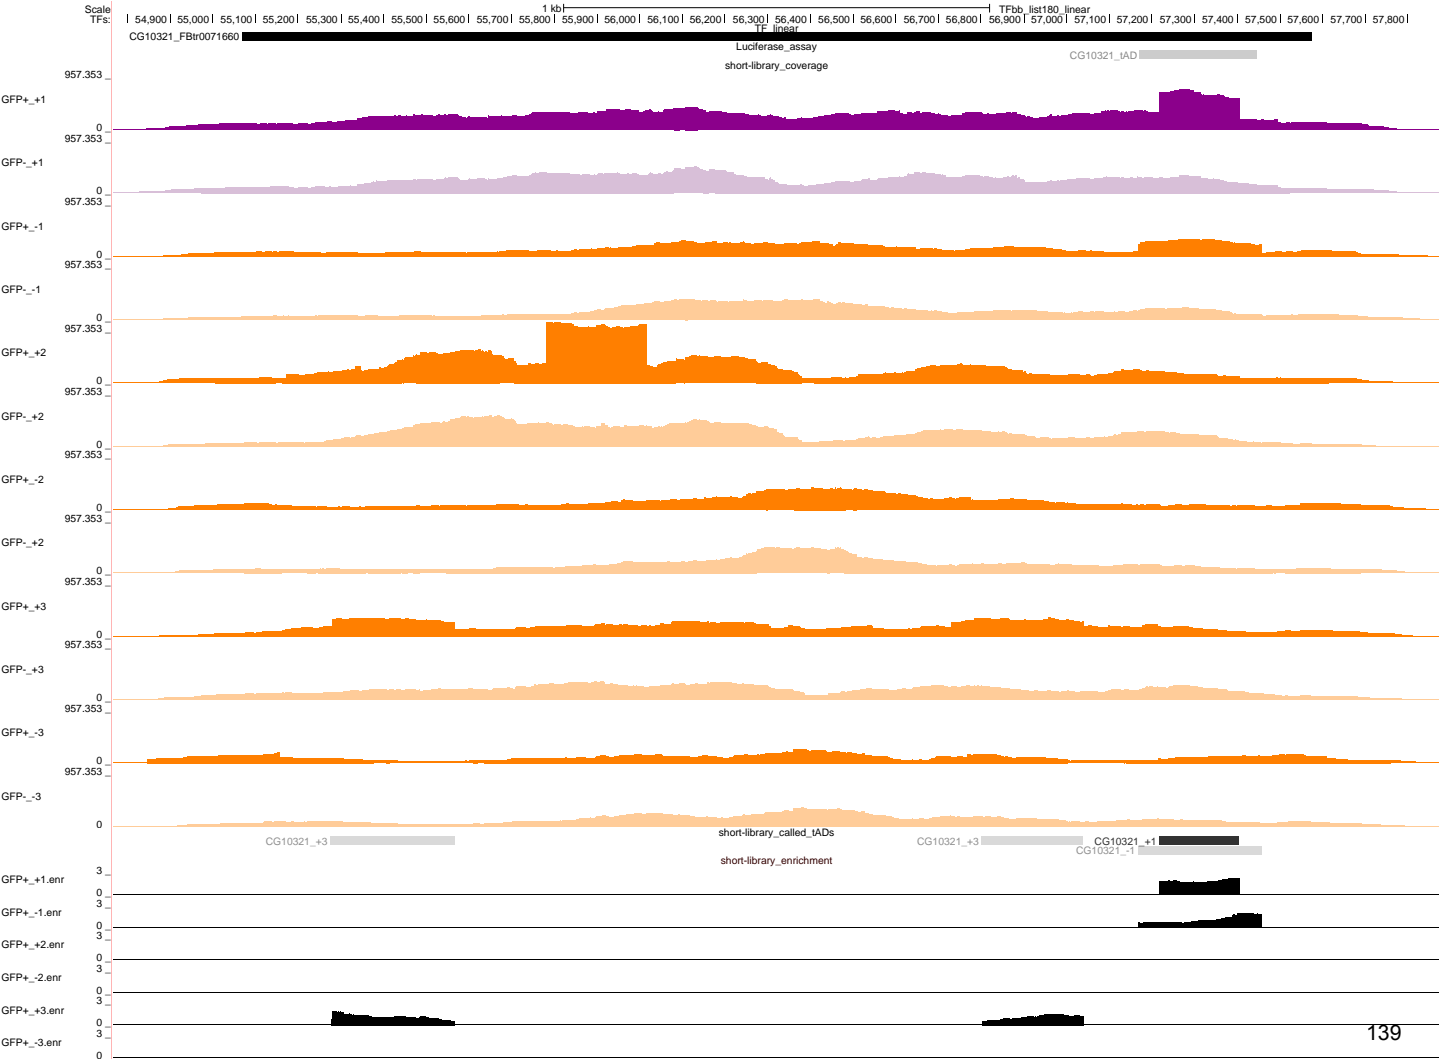

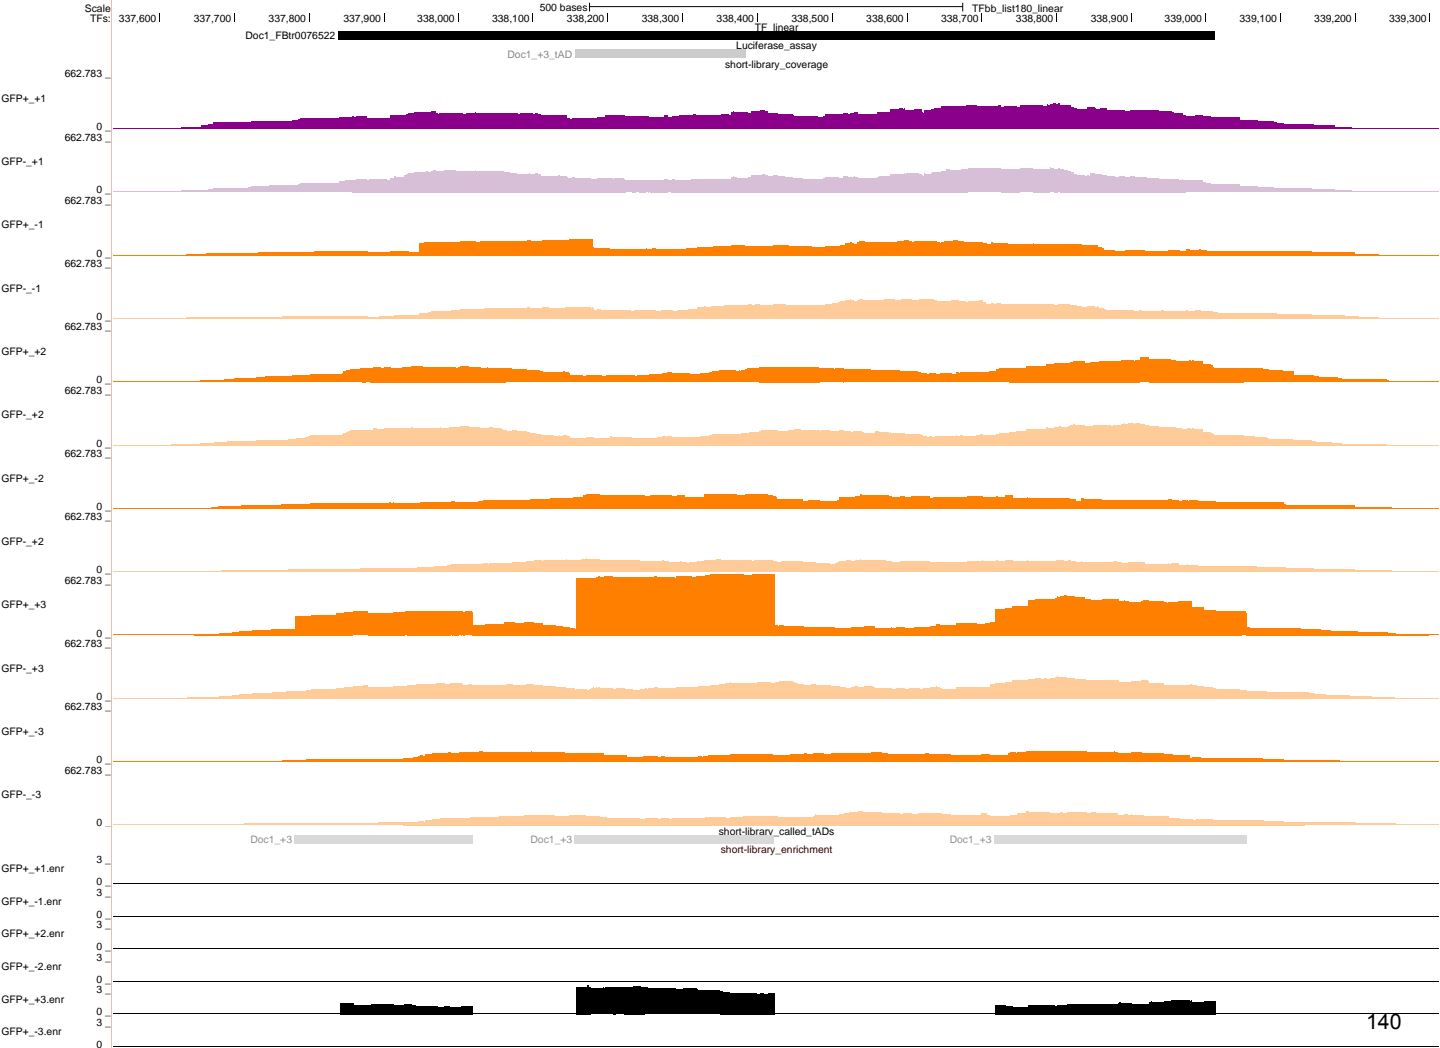



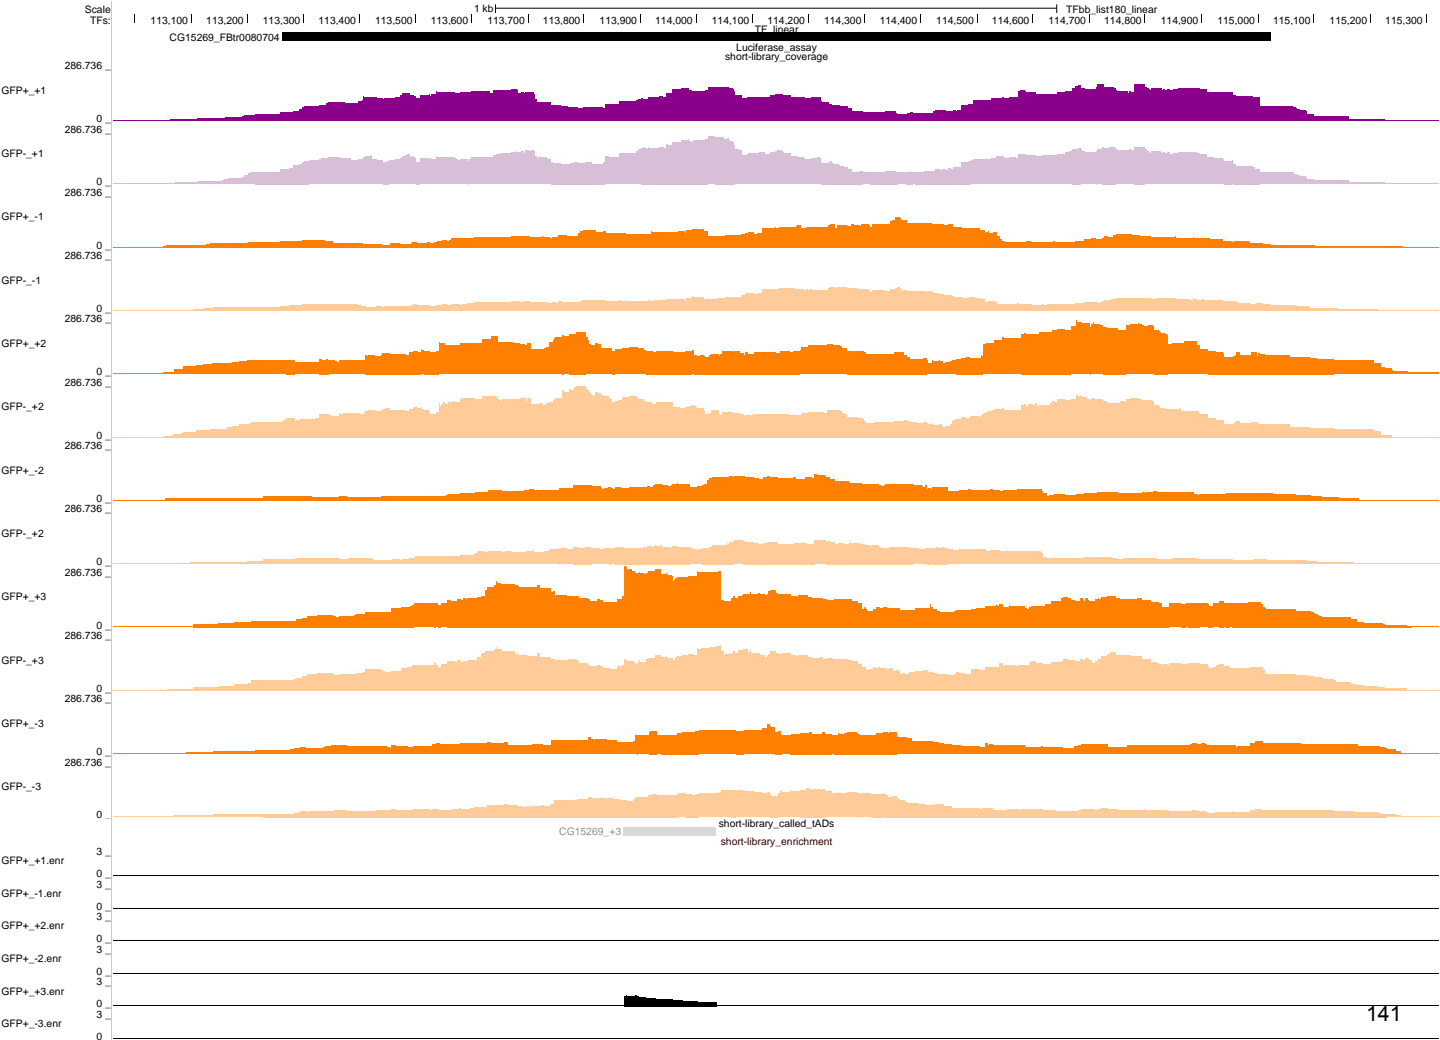

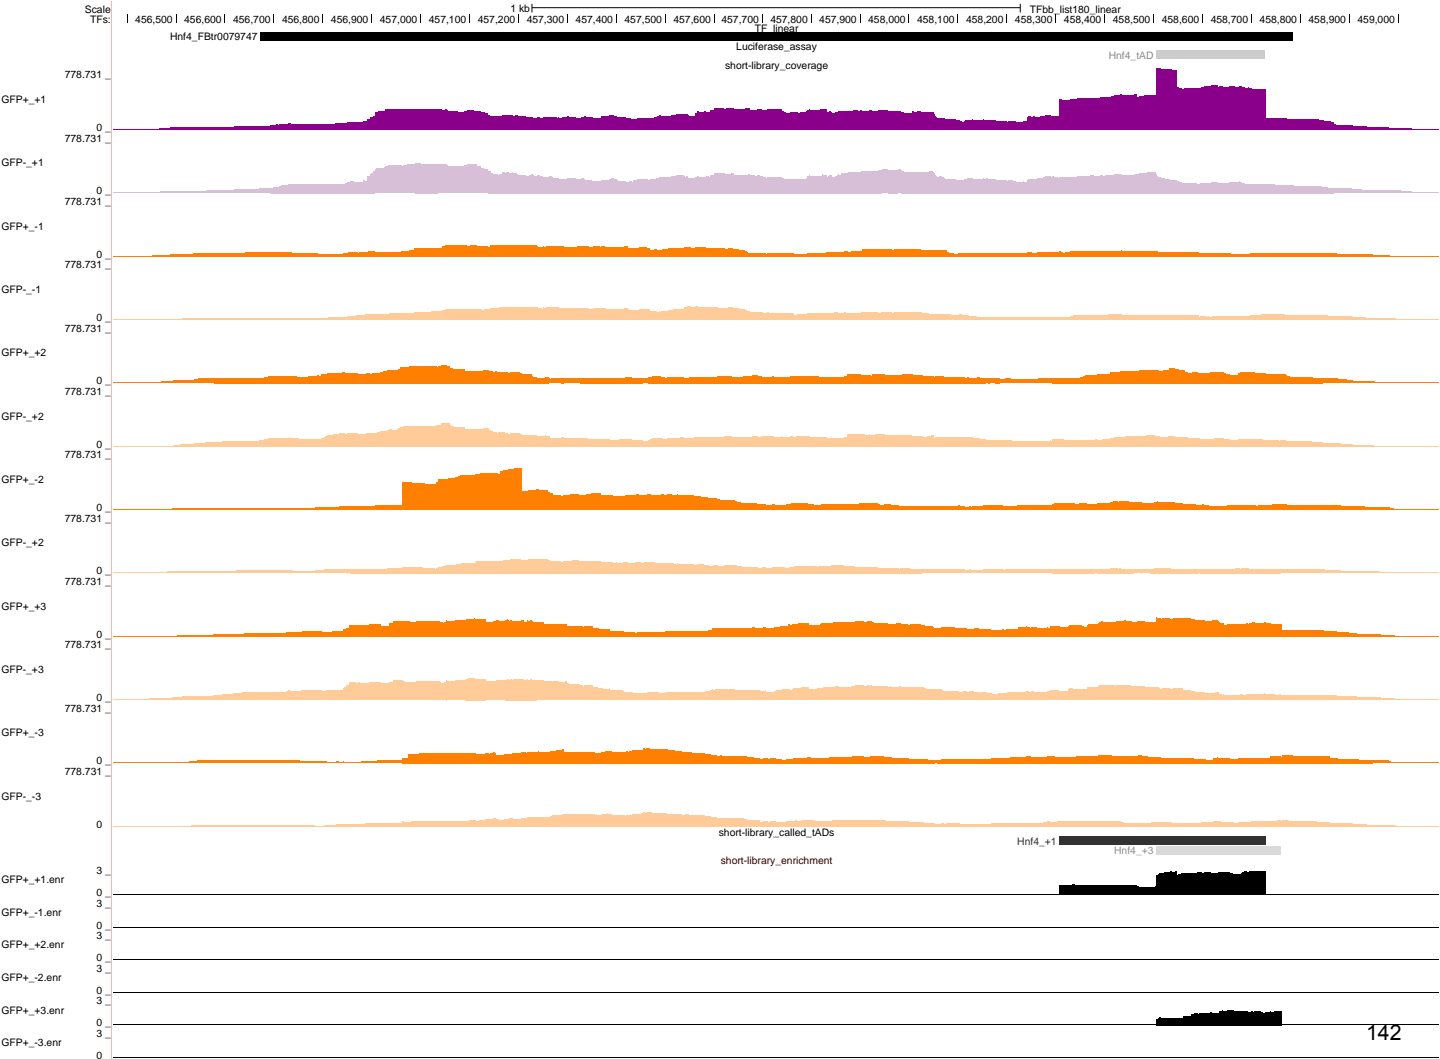

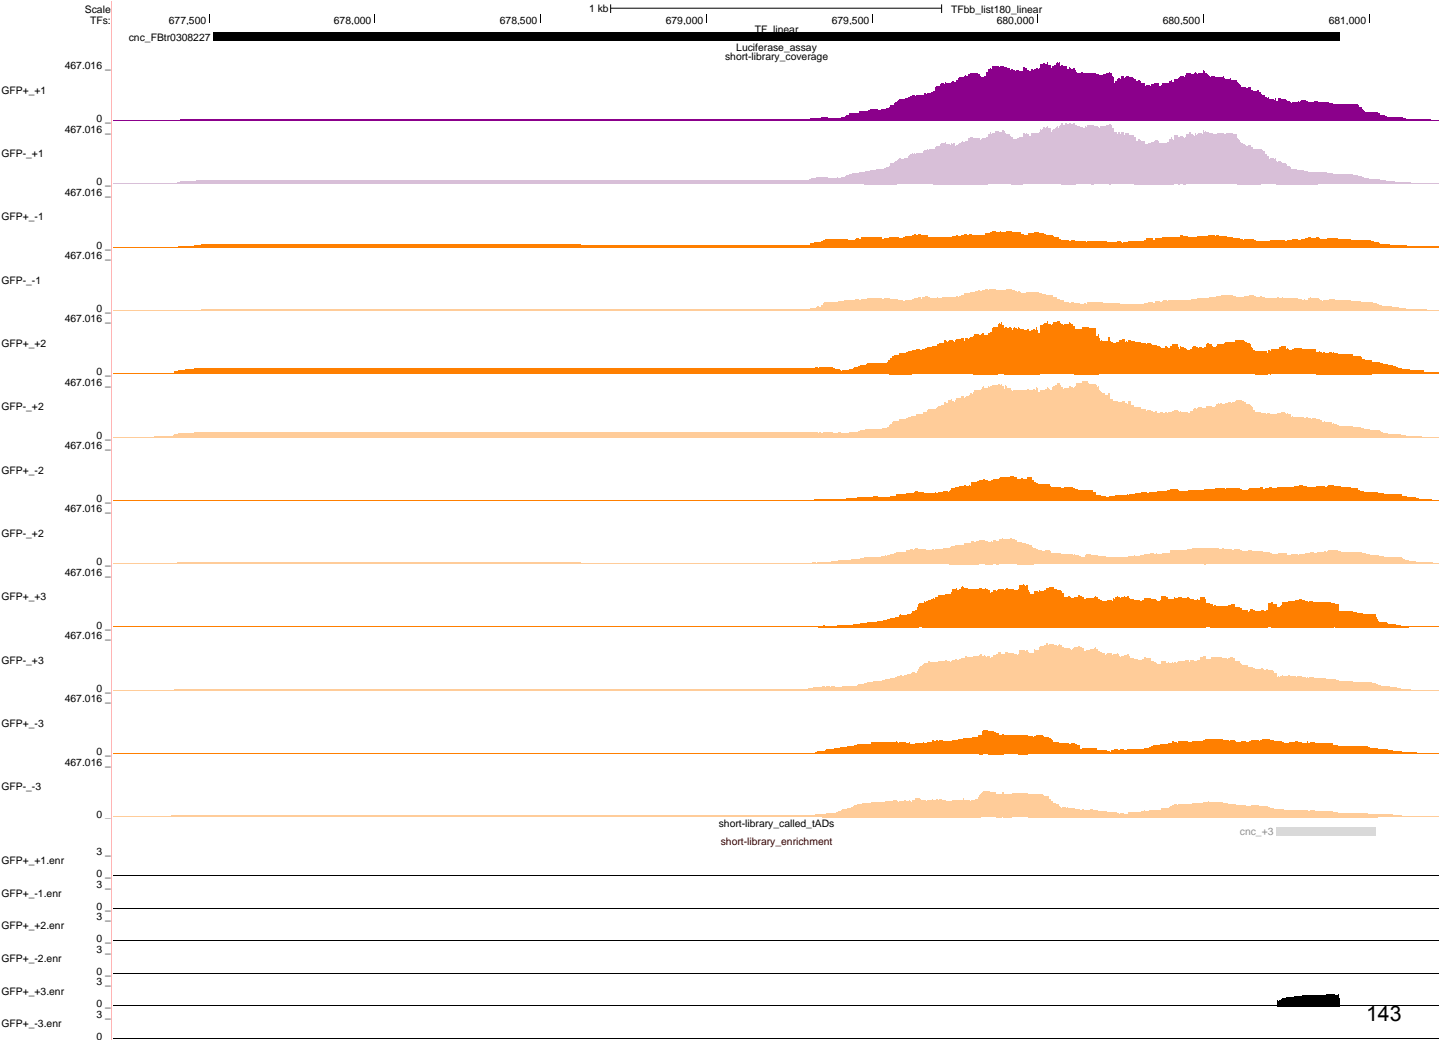

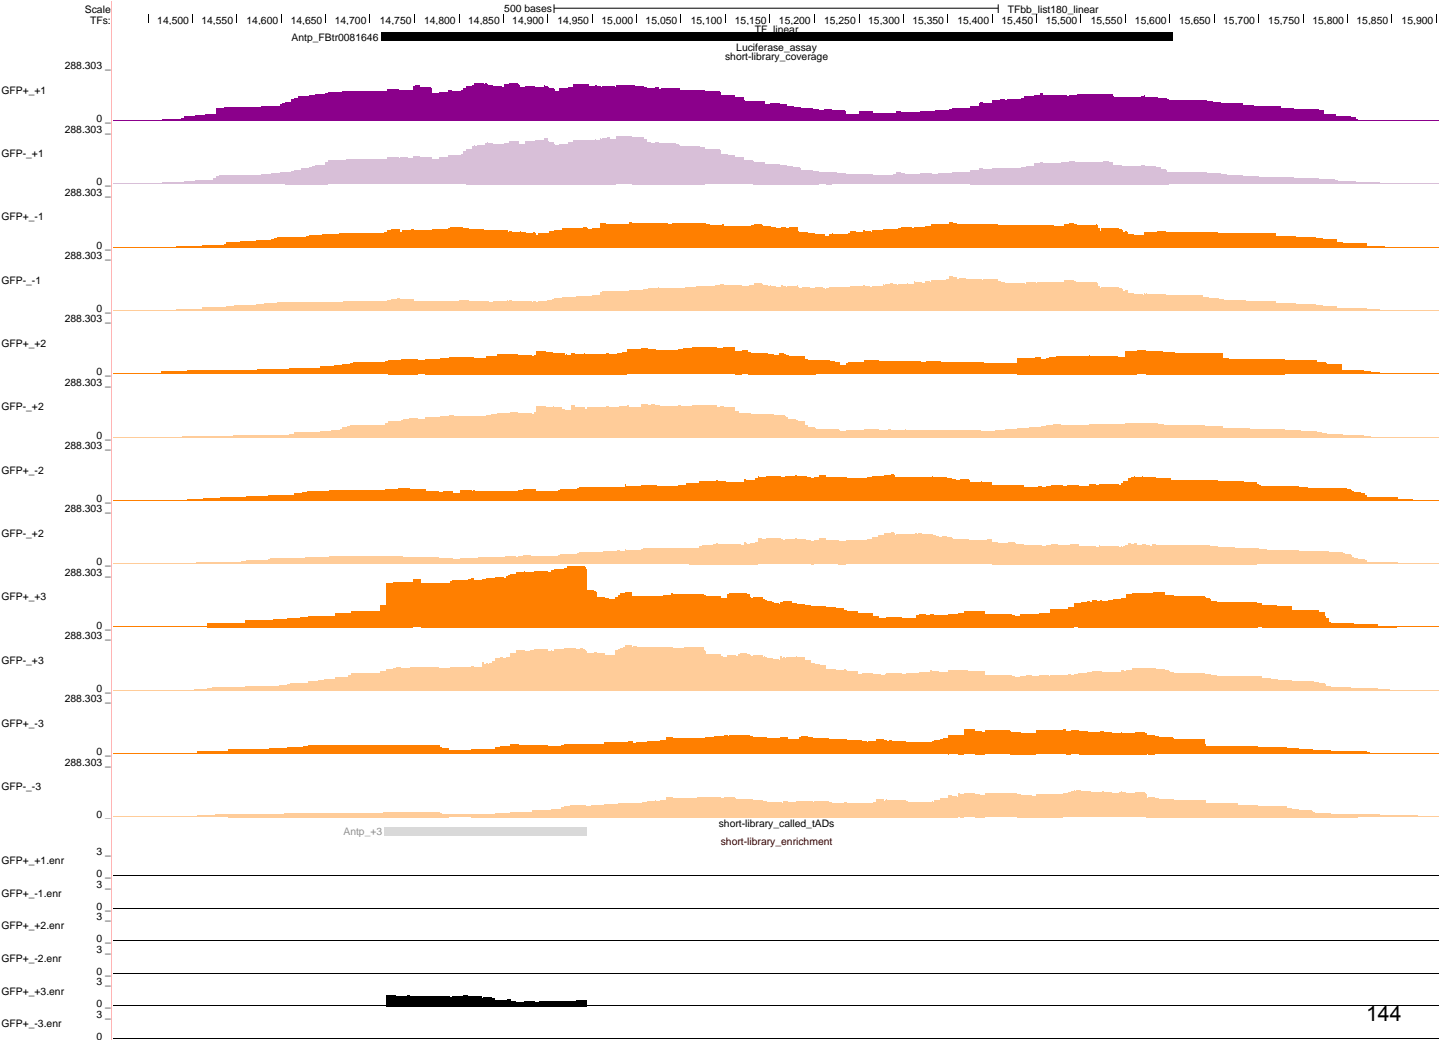

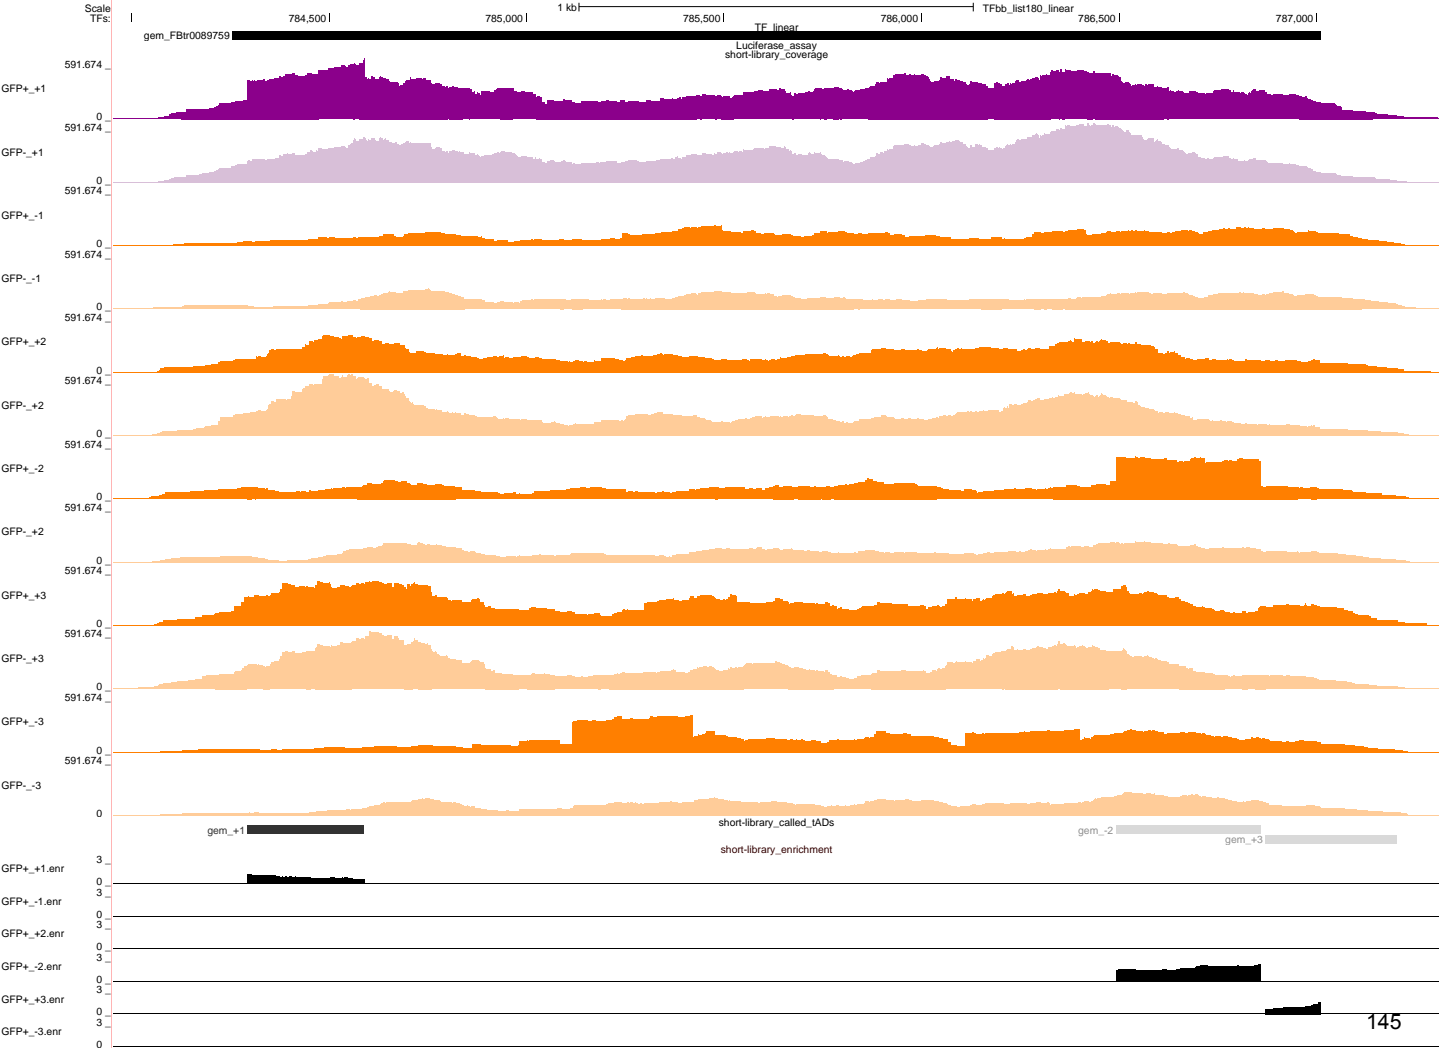

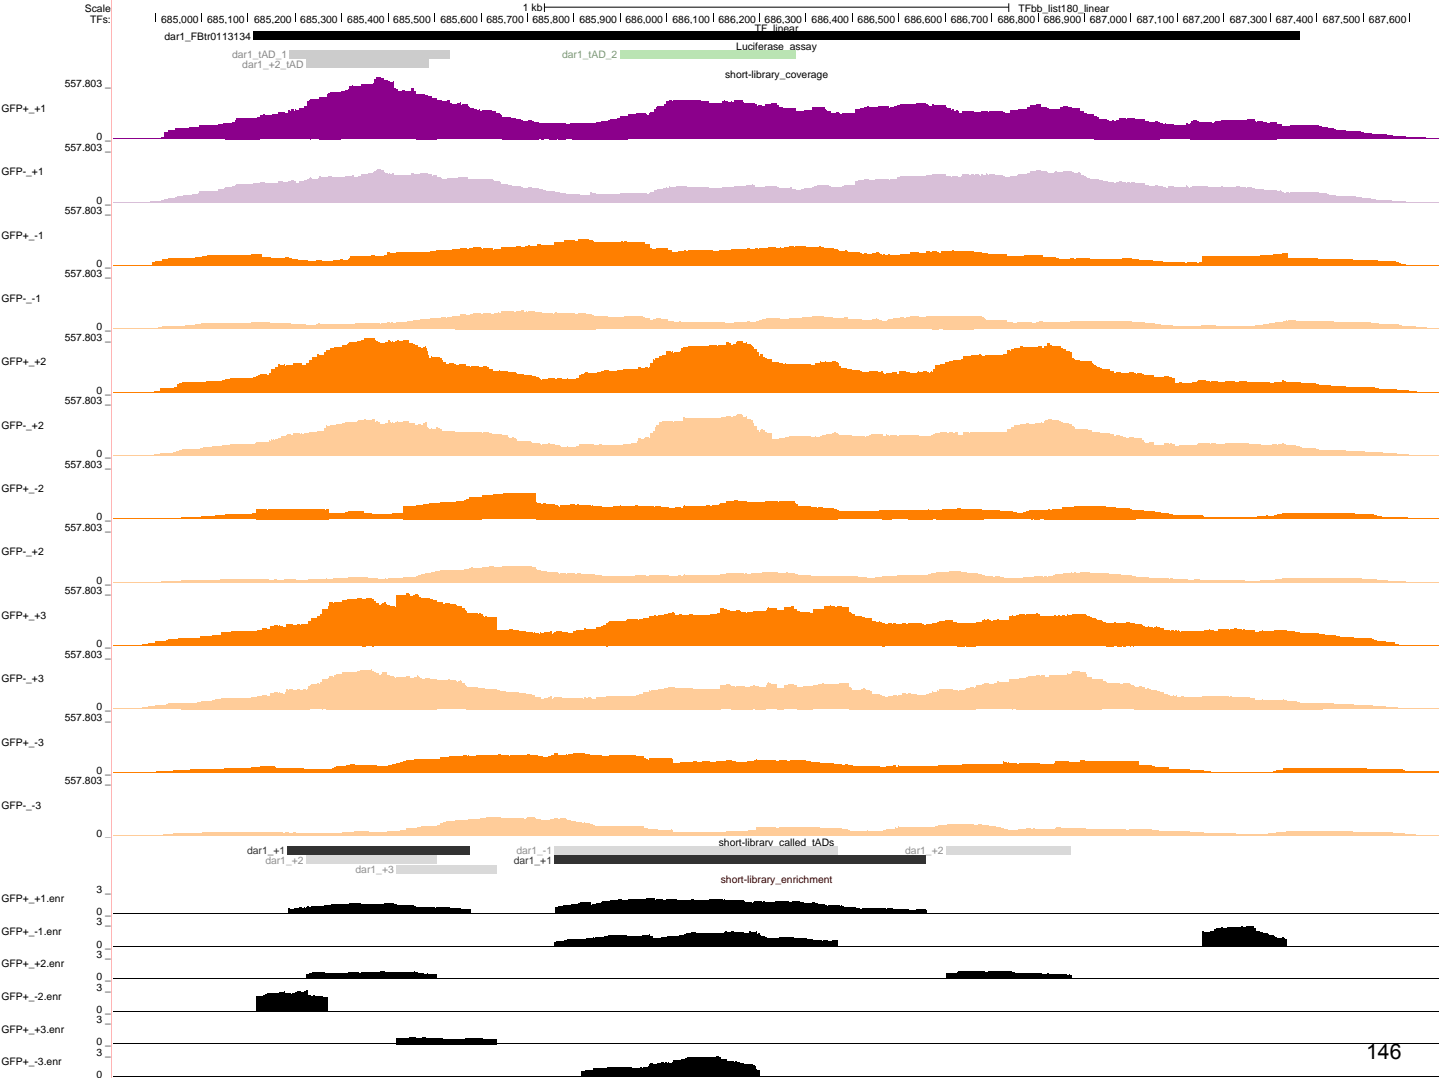

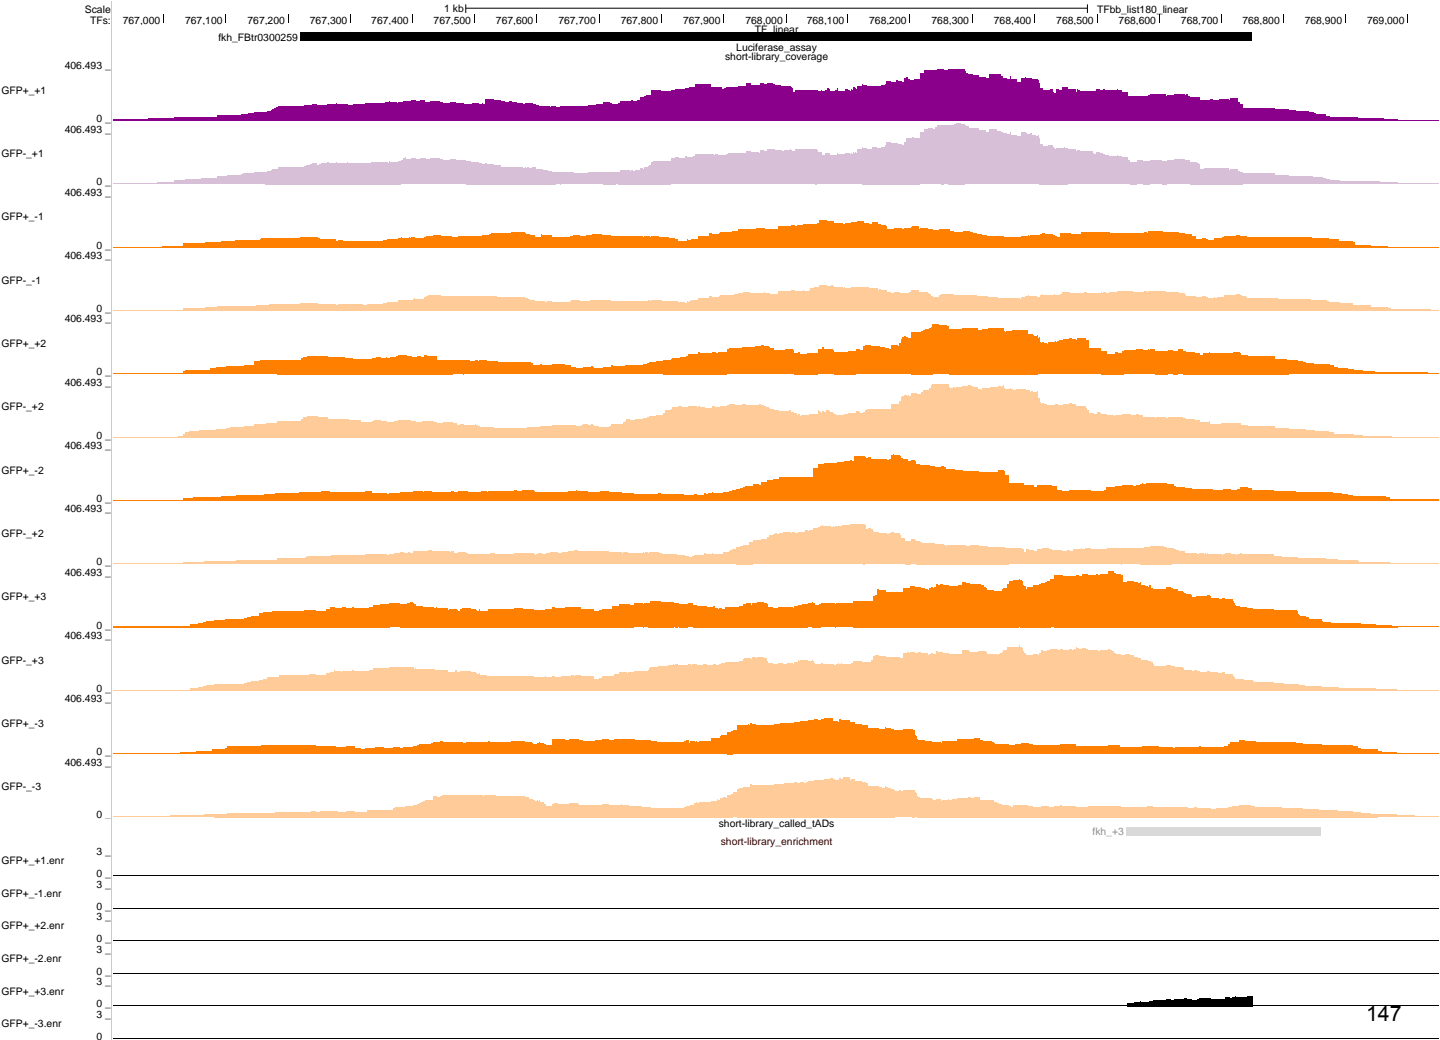

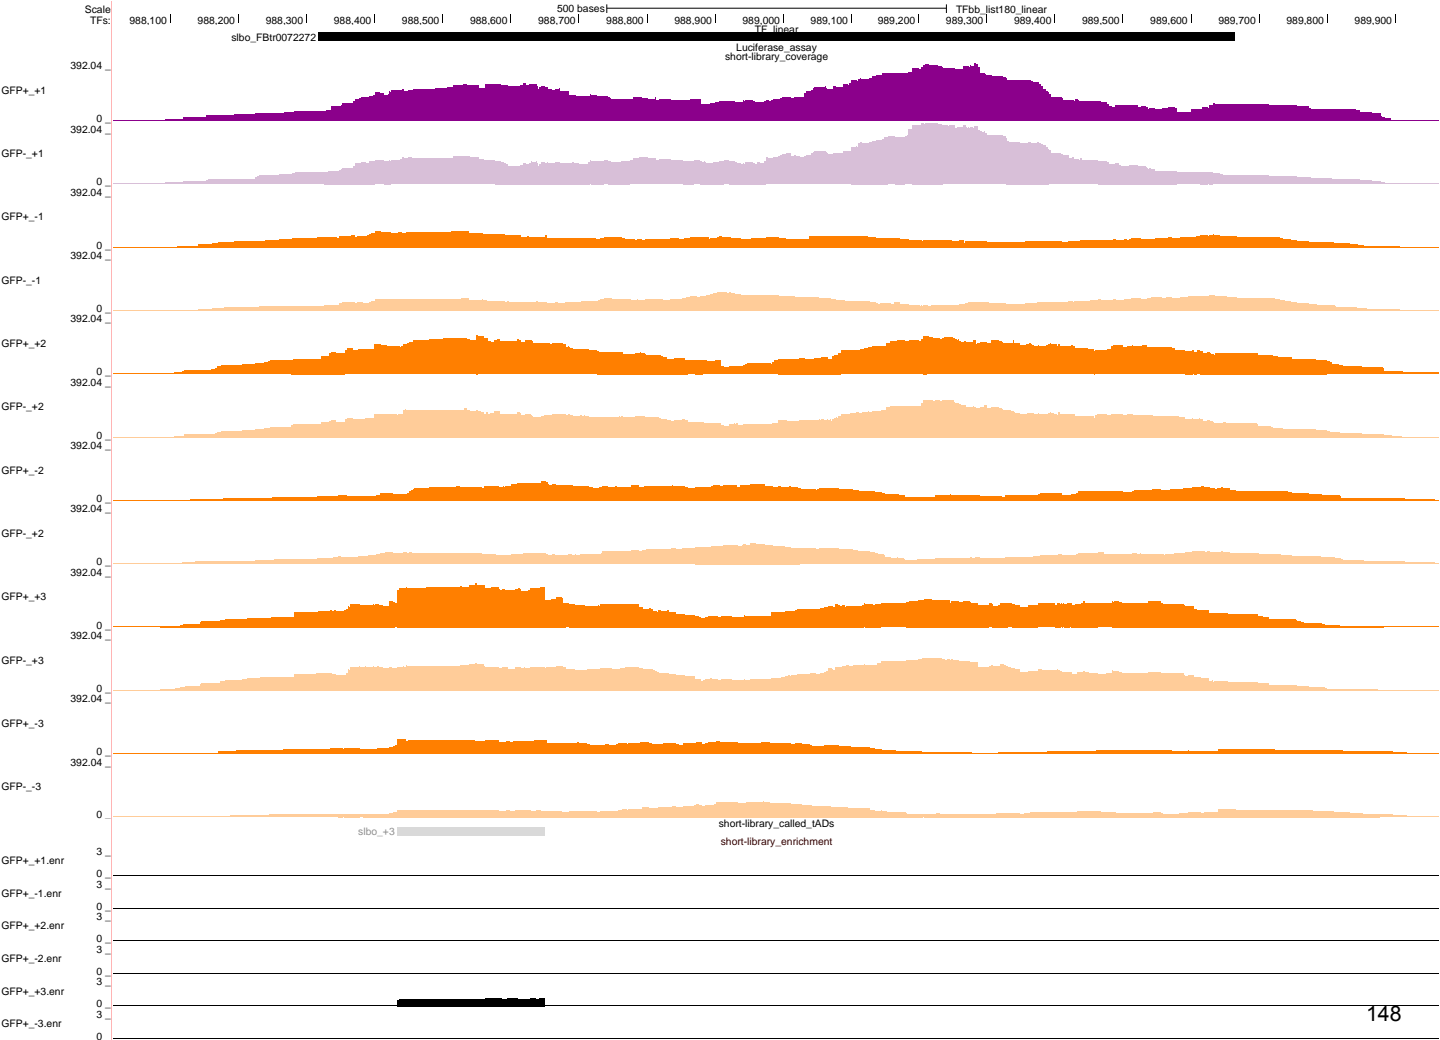



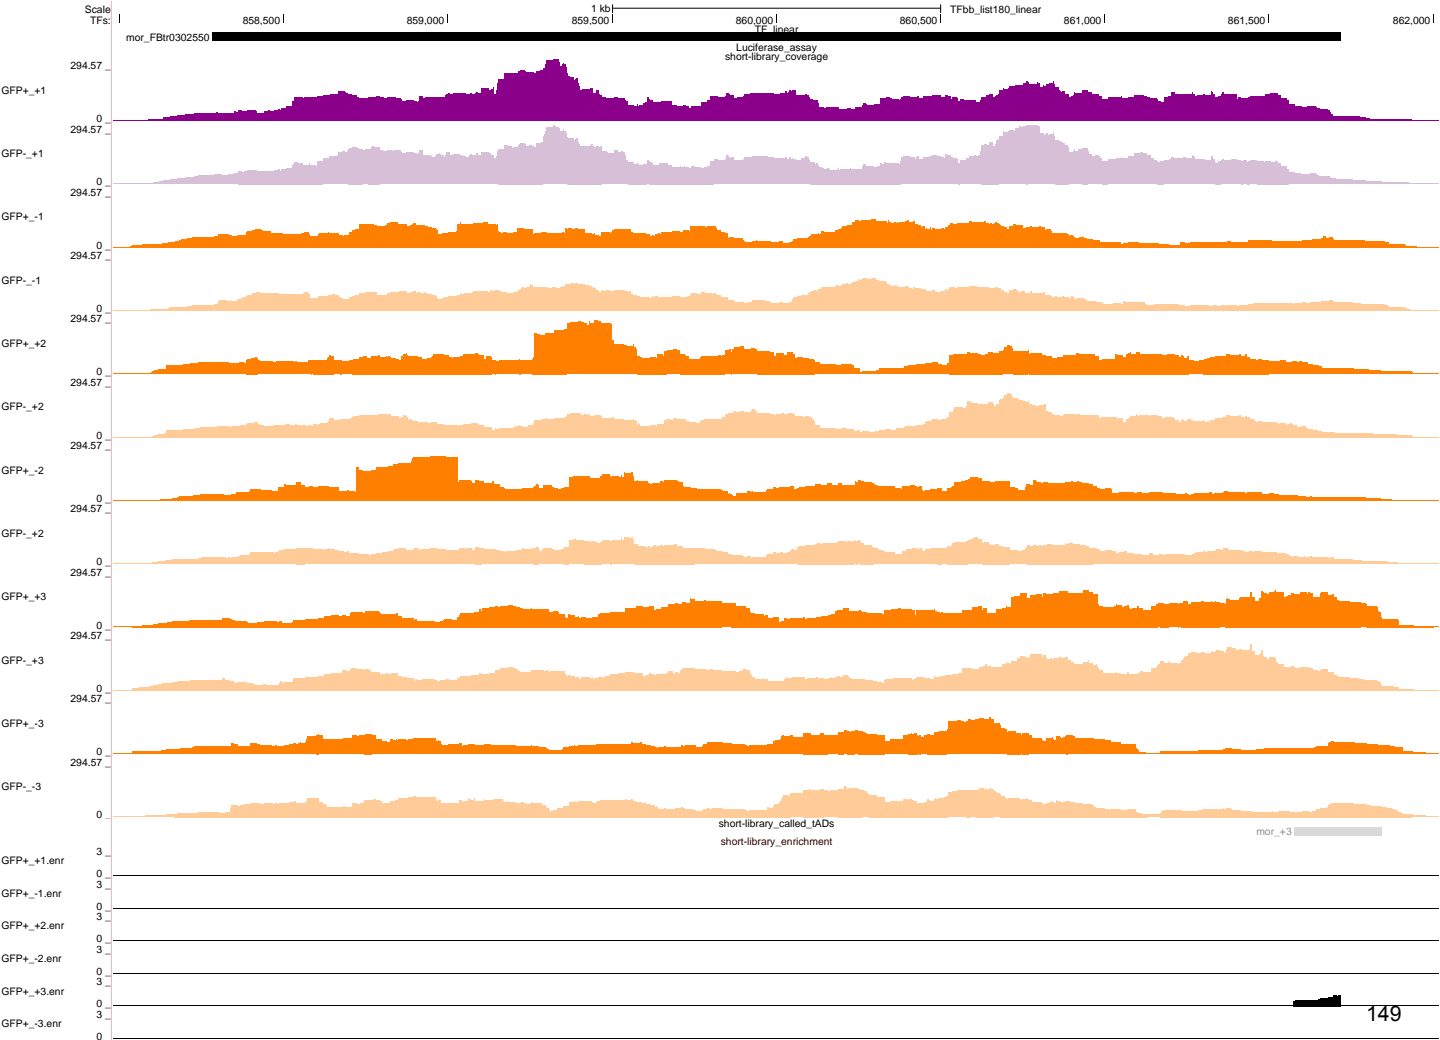

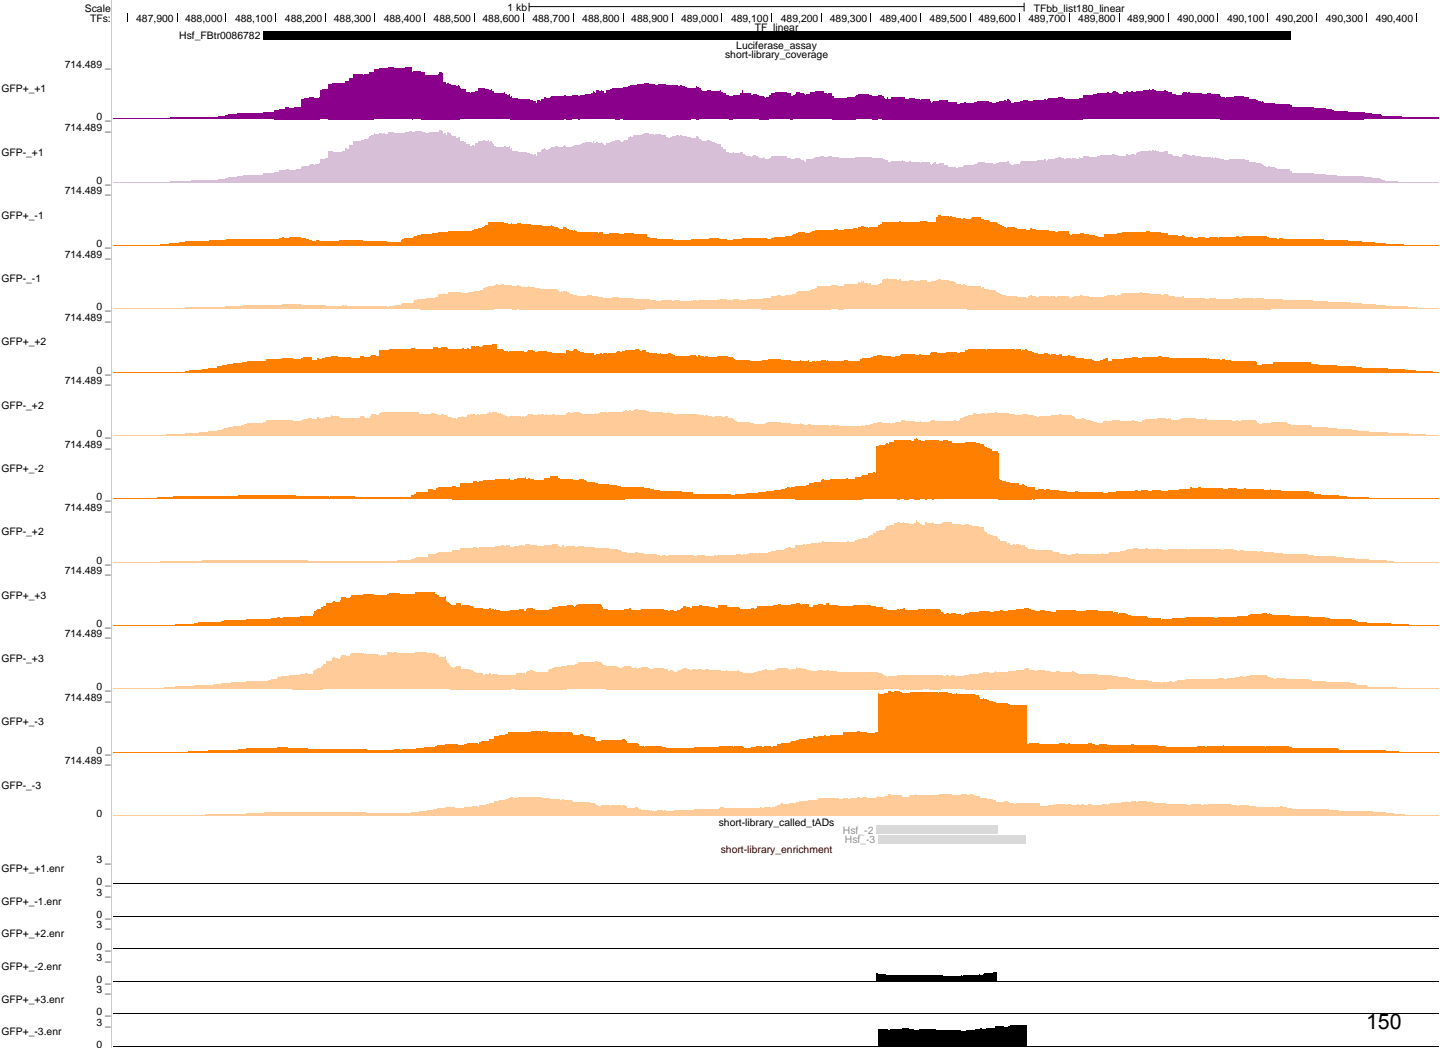

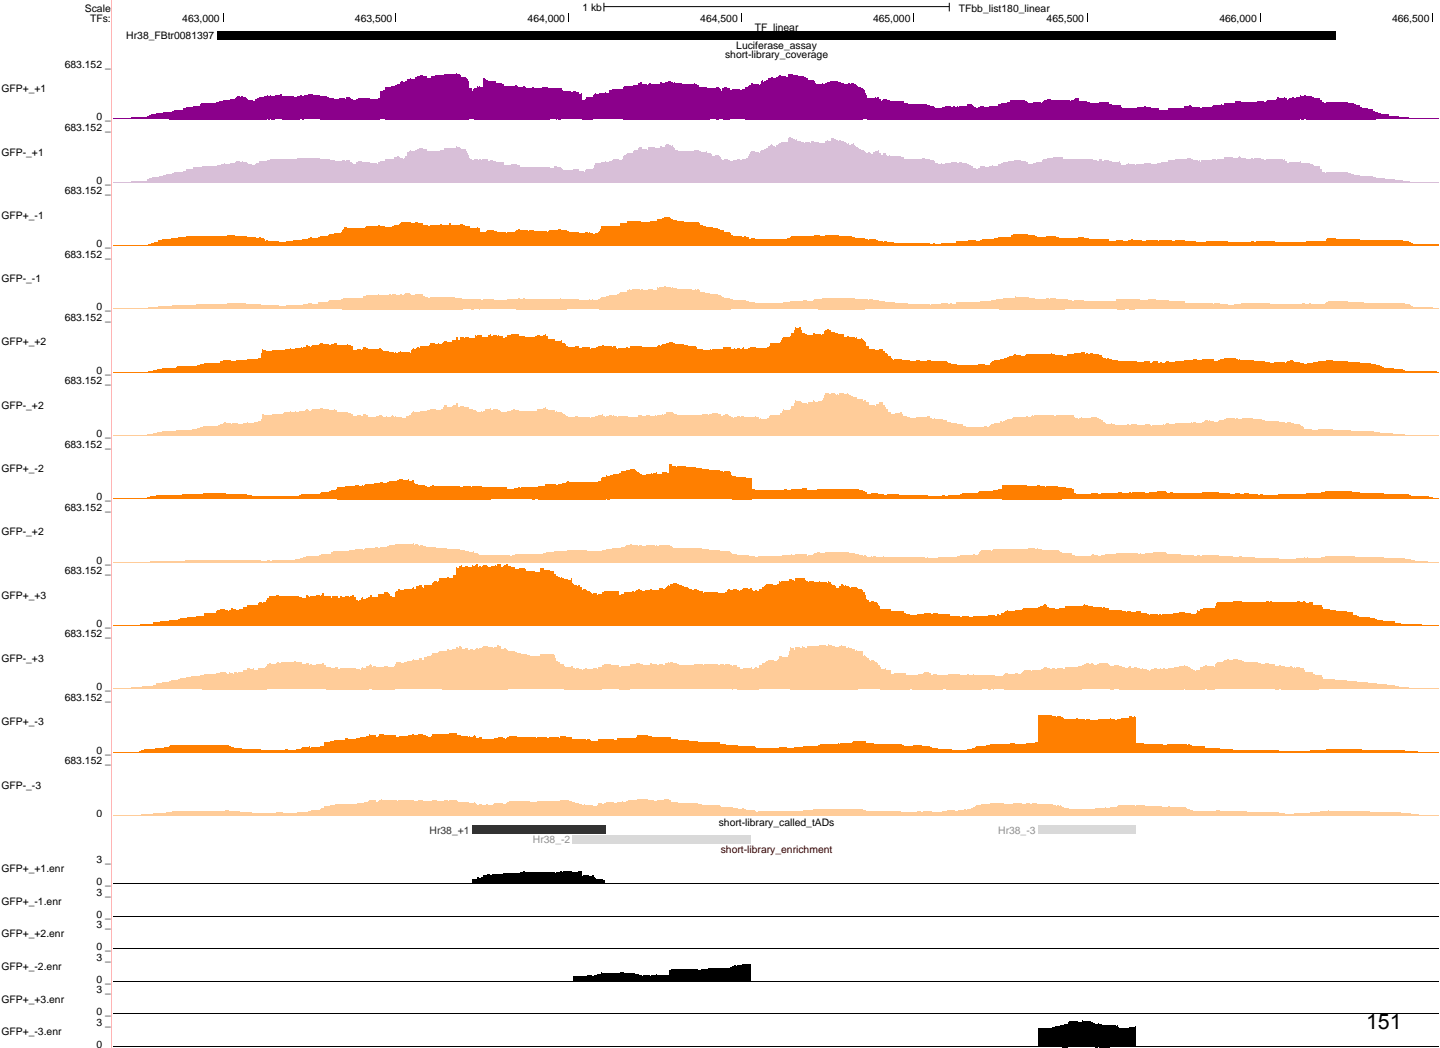

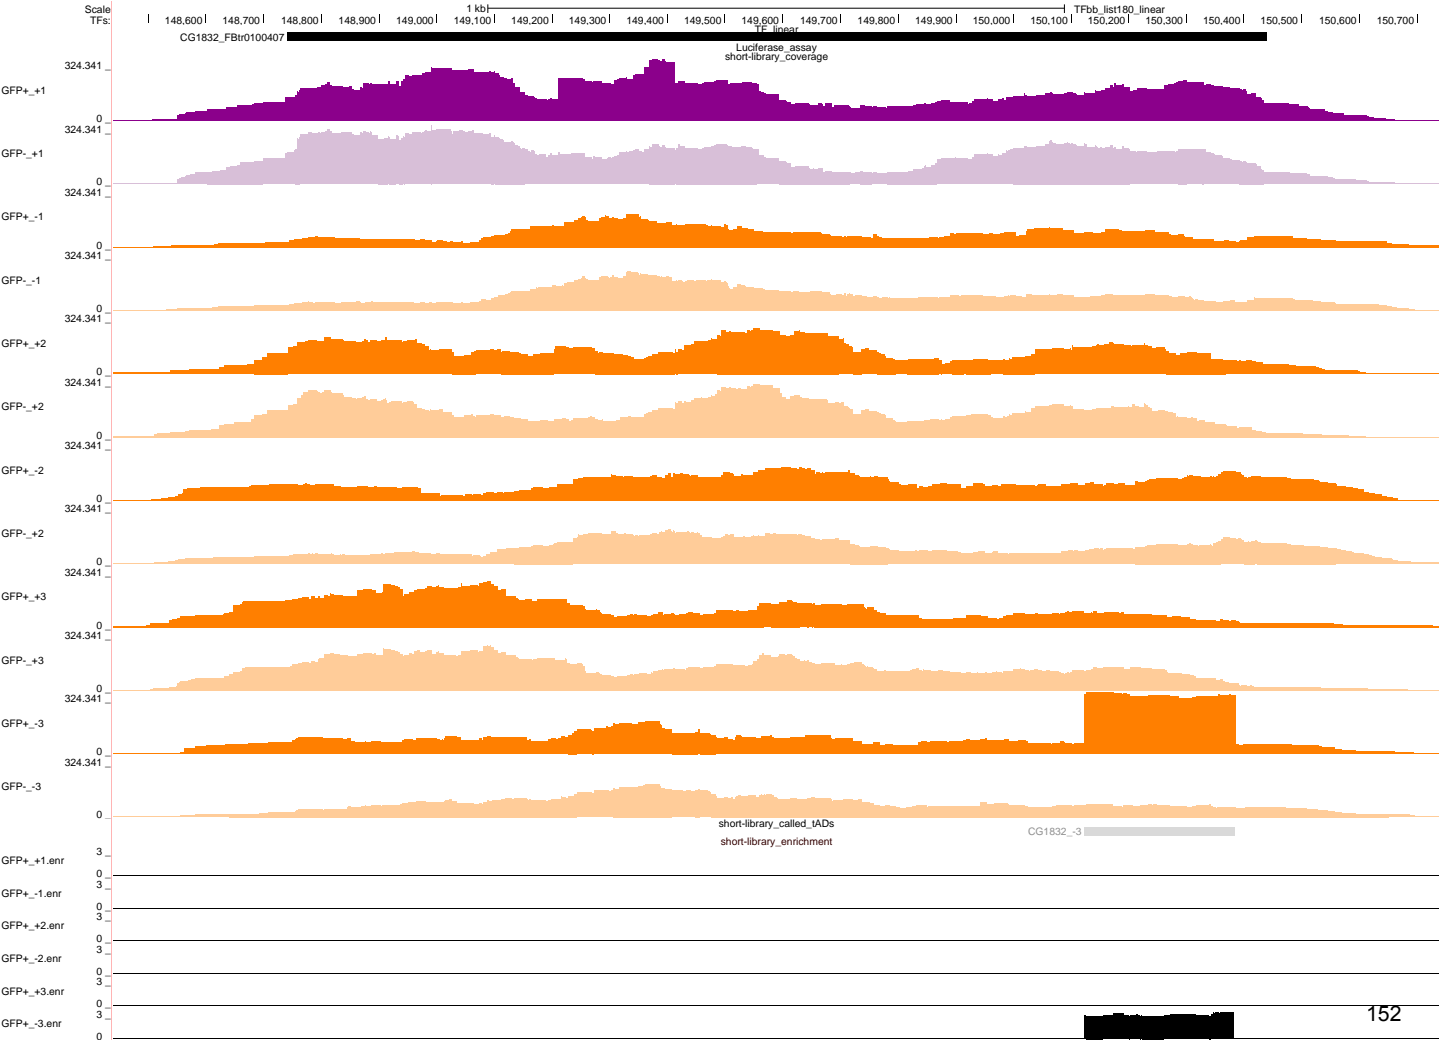

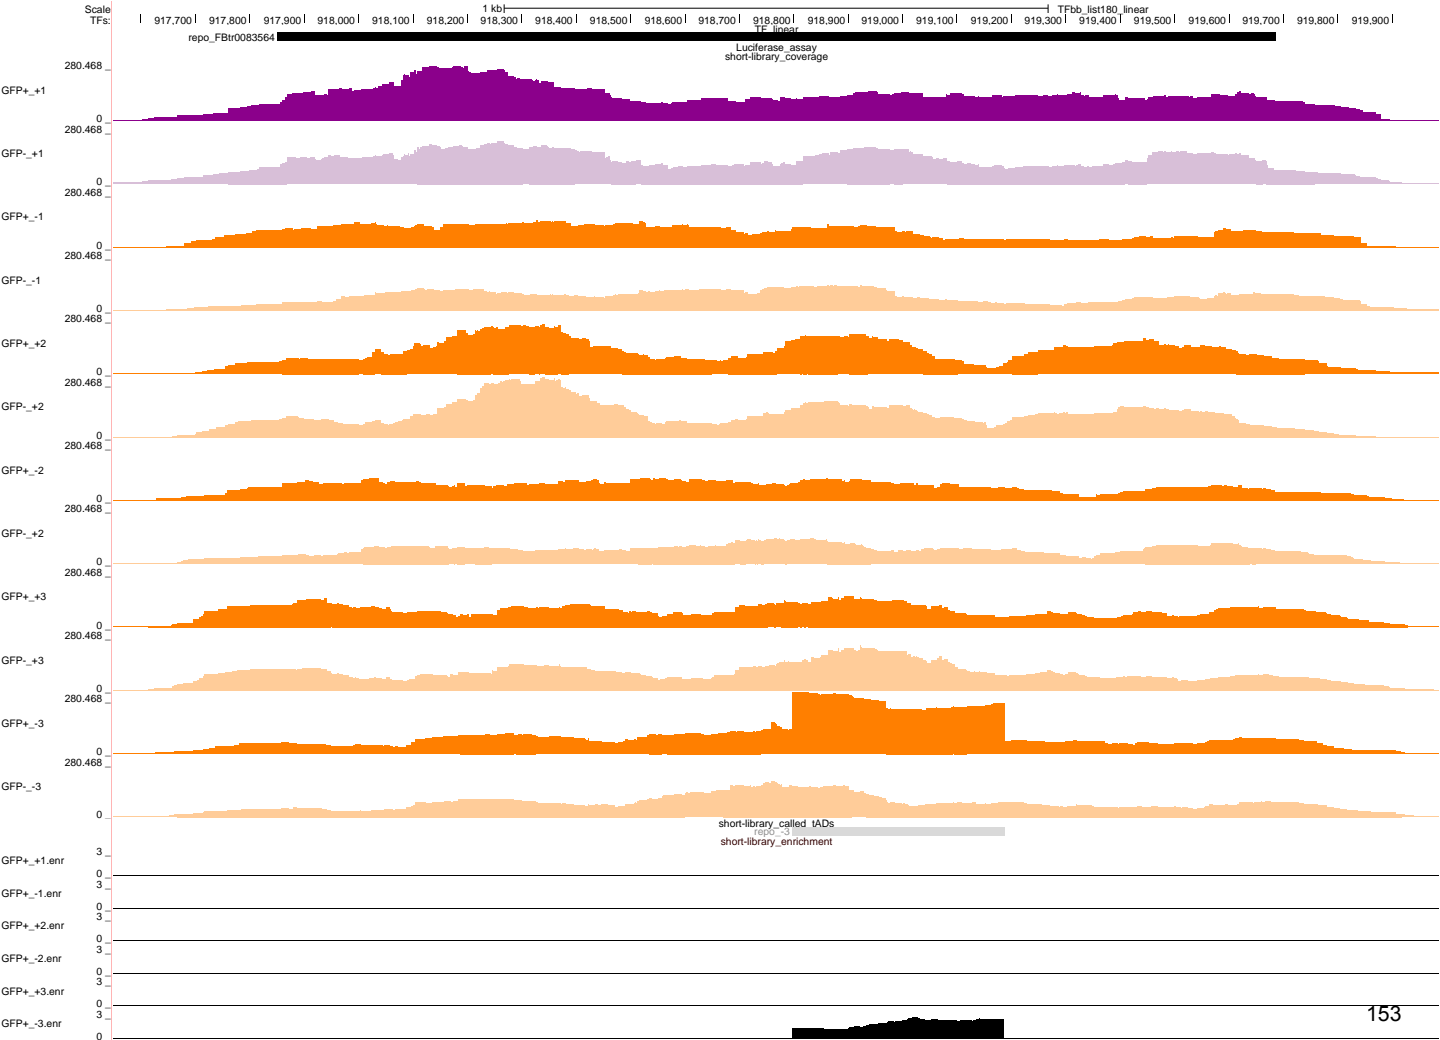



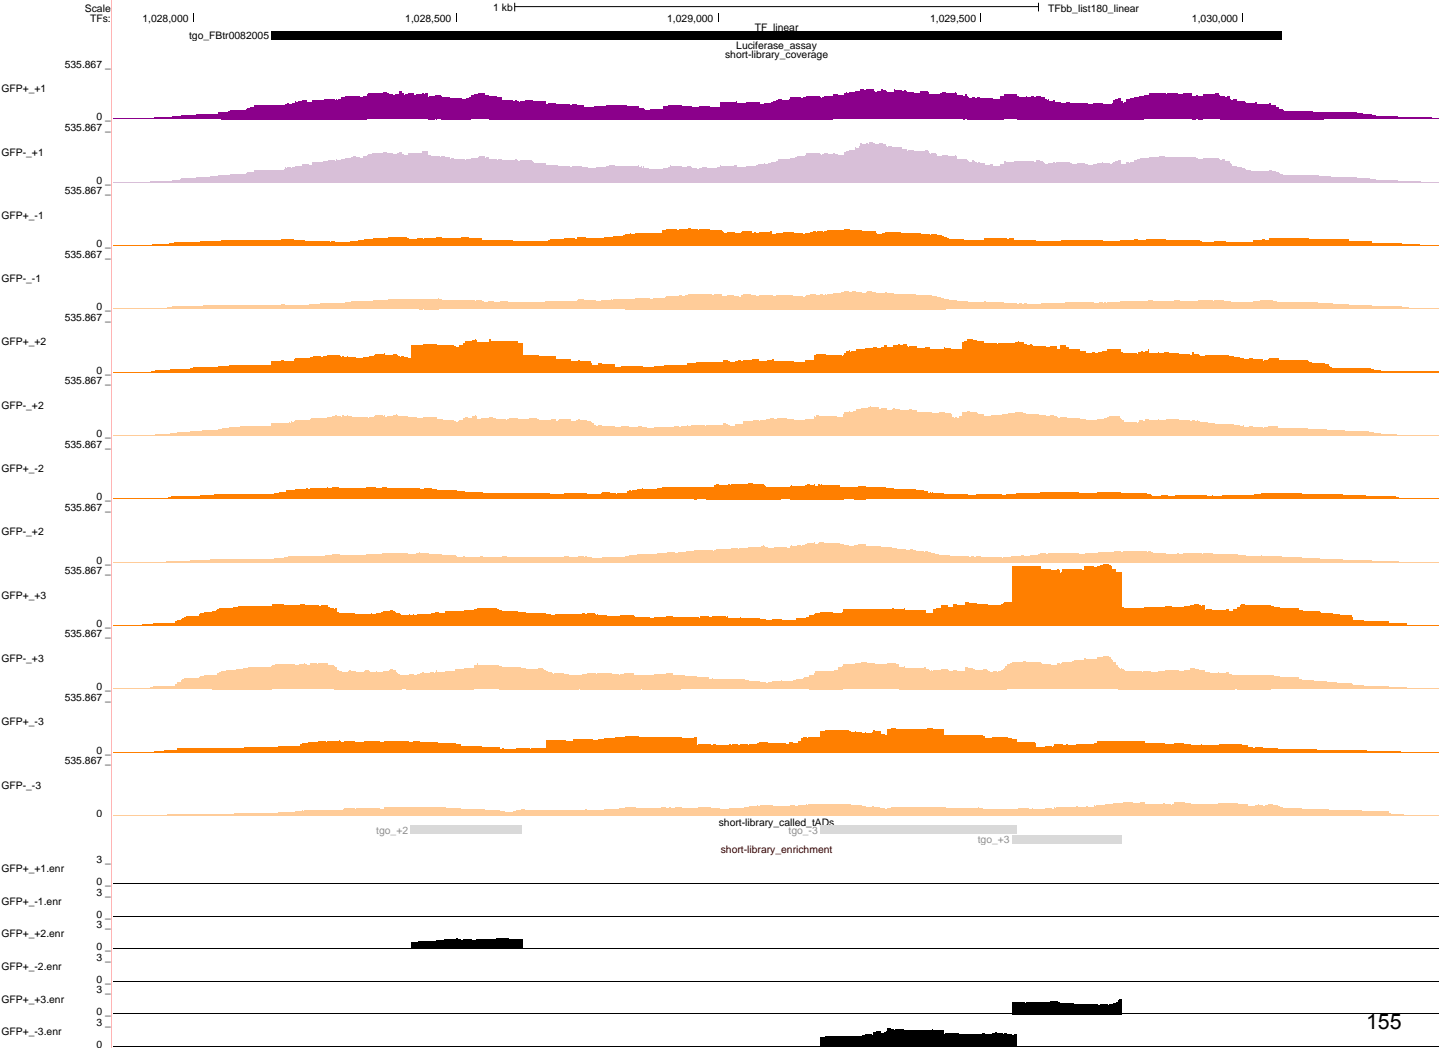

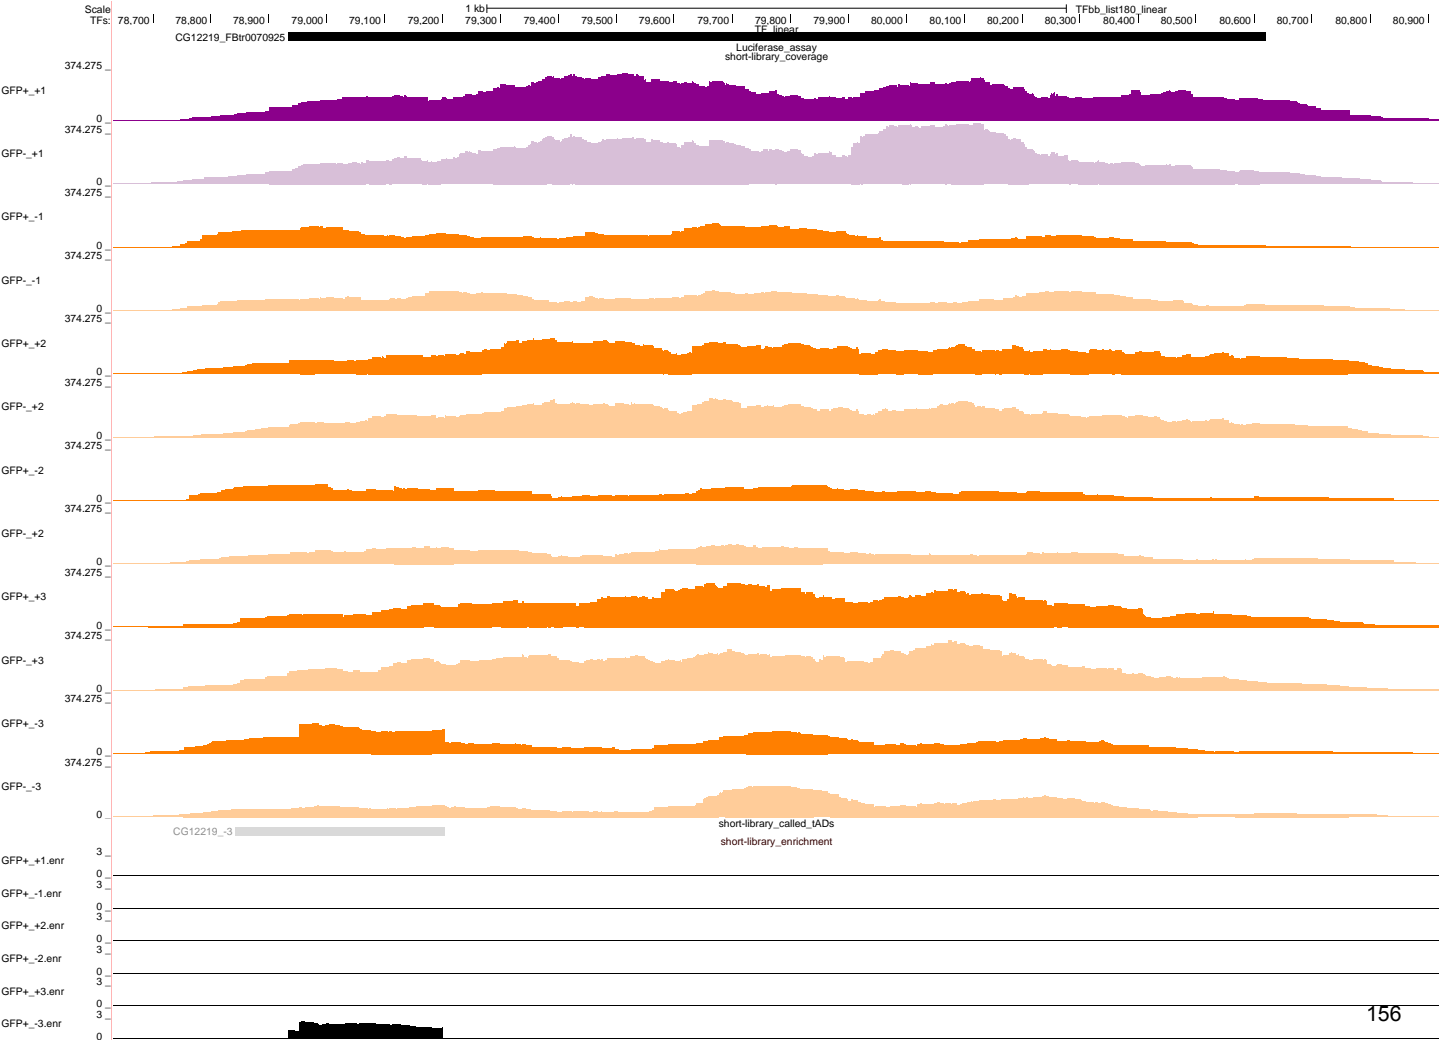



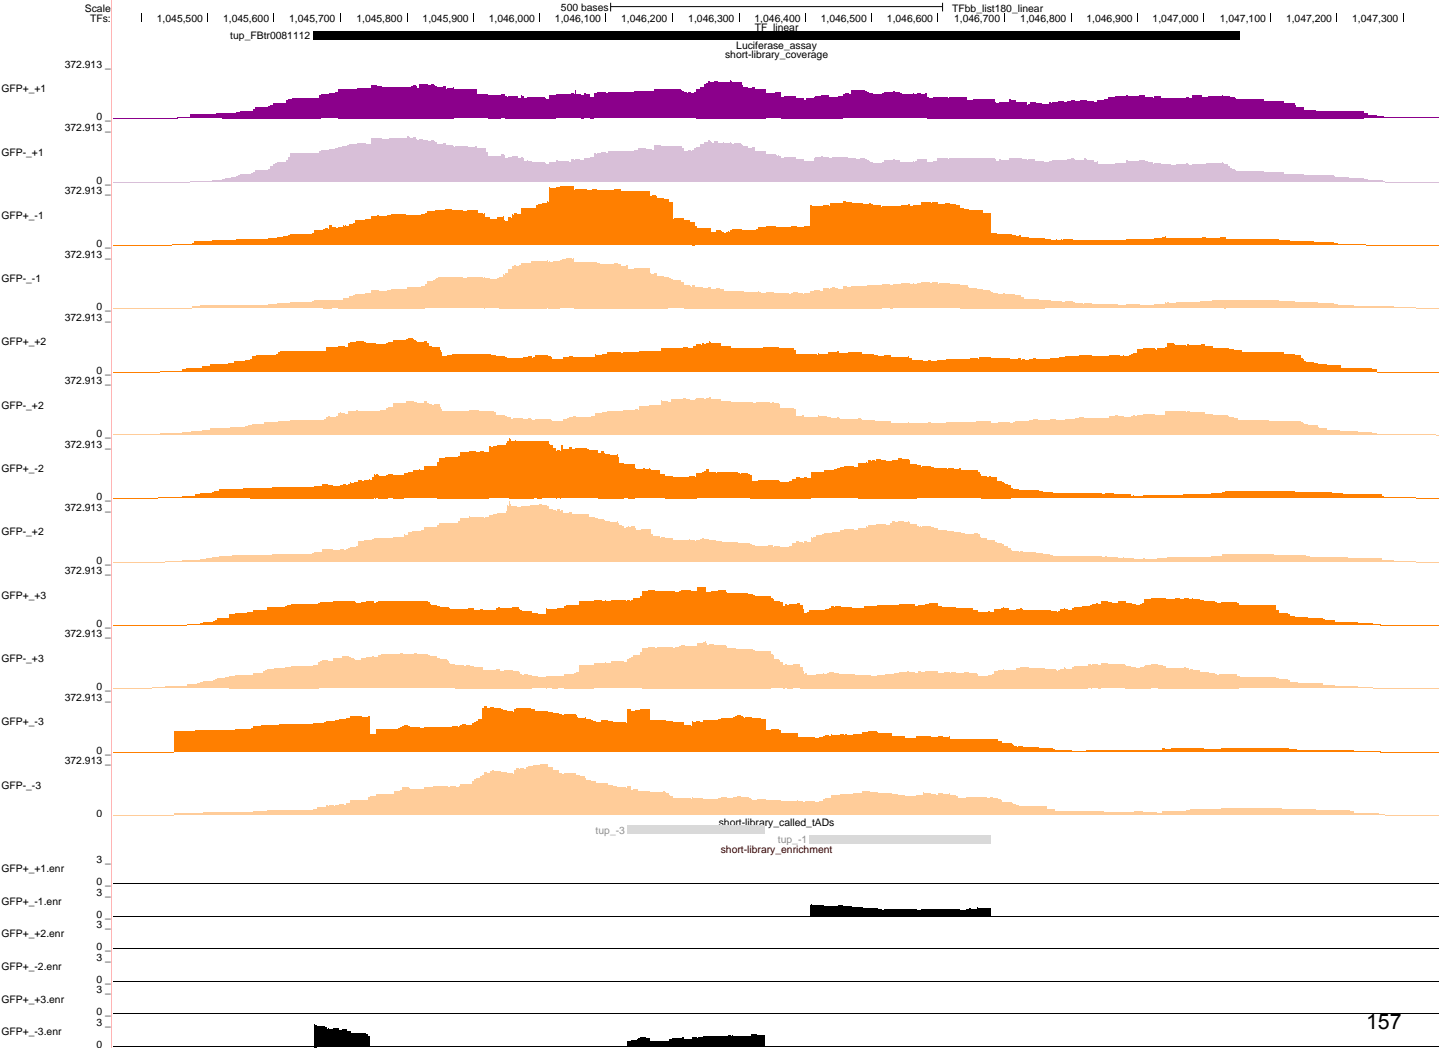

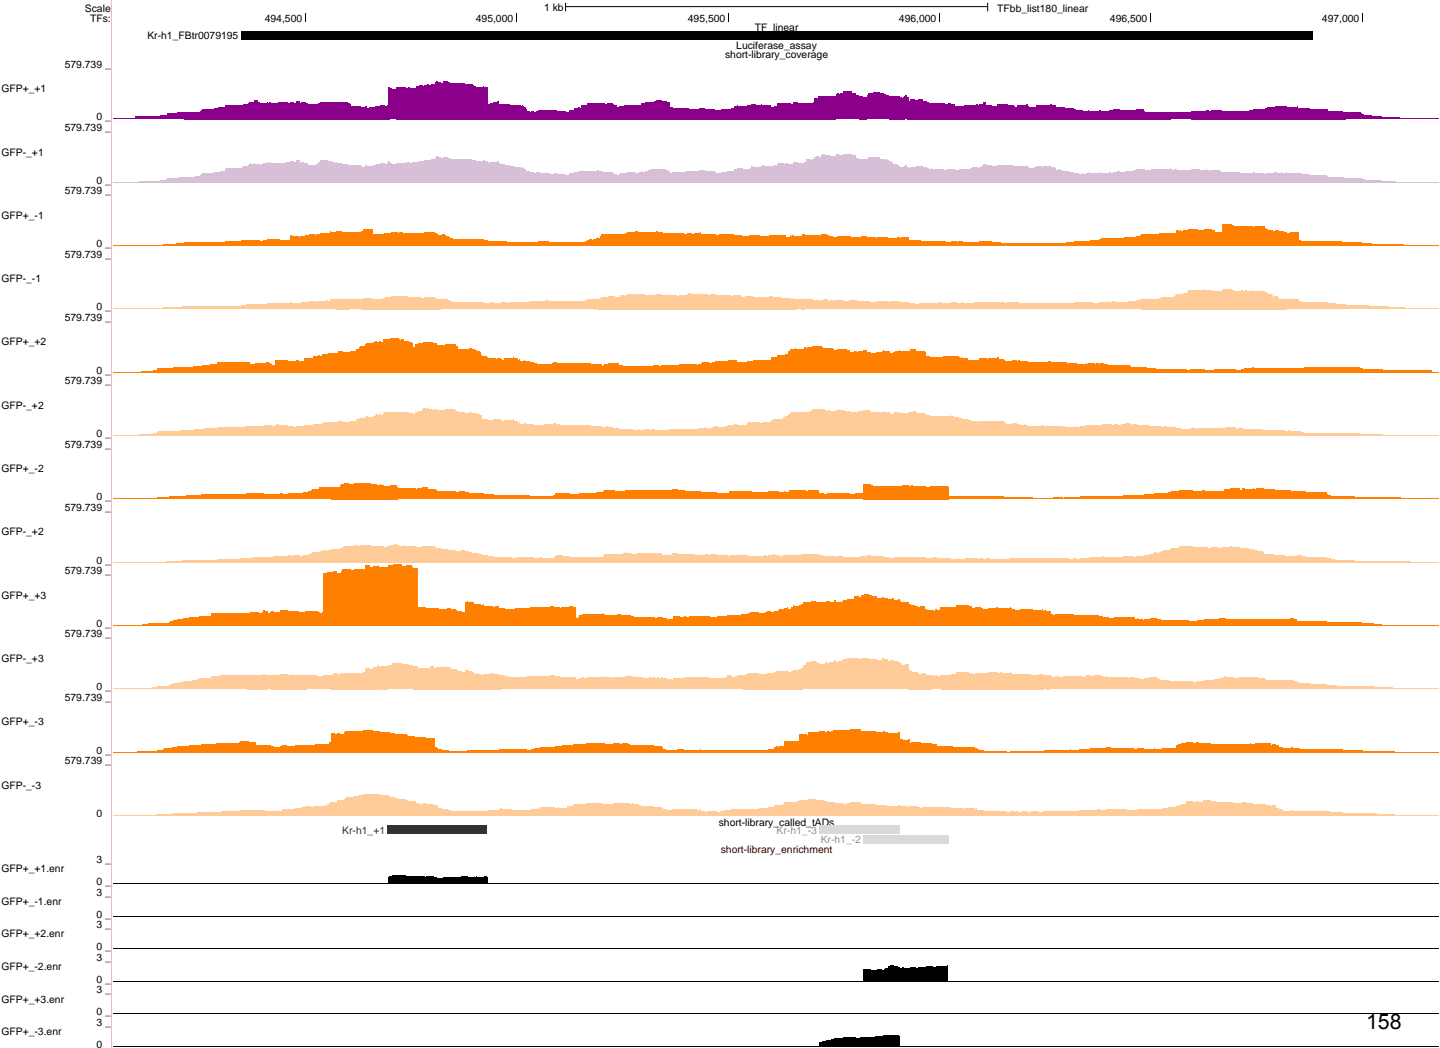



## **Appendix Figure S3**

18 long-fragment library native (+1) reading-frame tADs

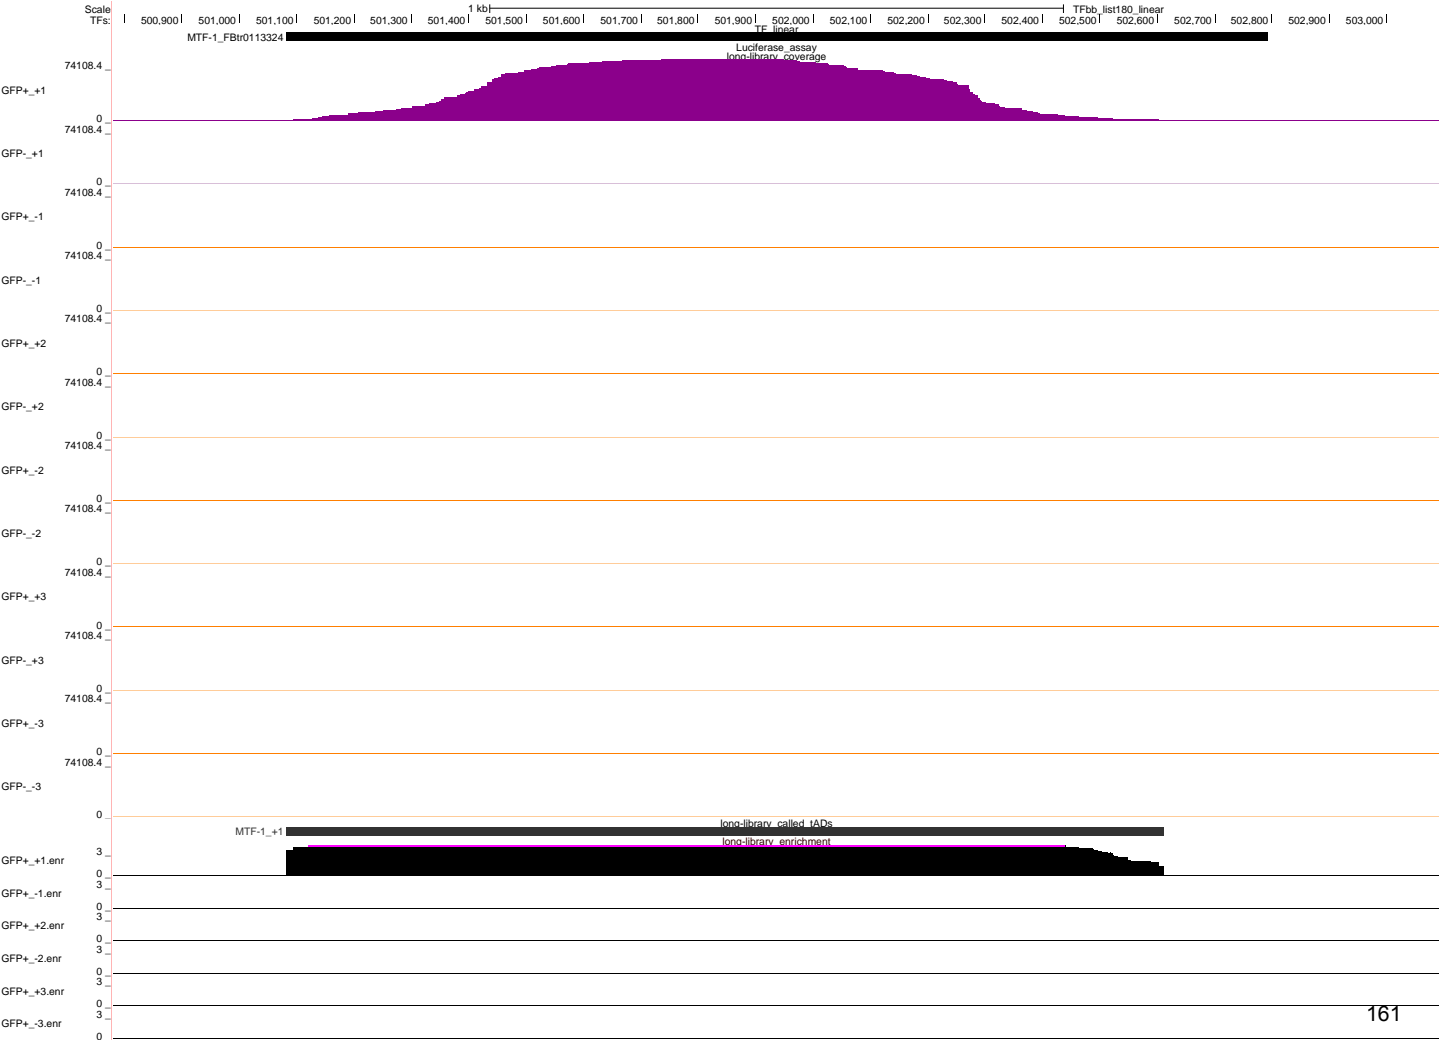

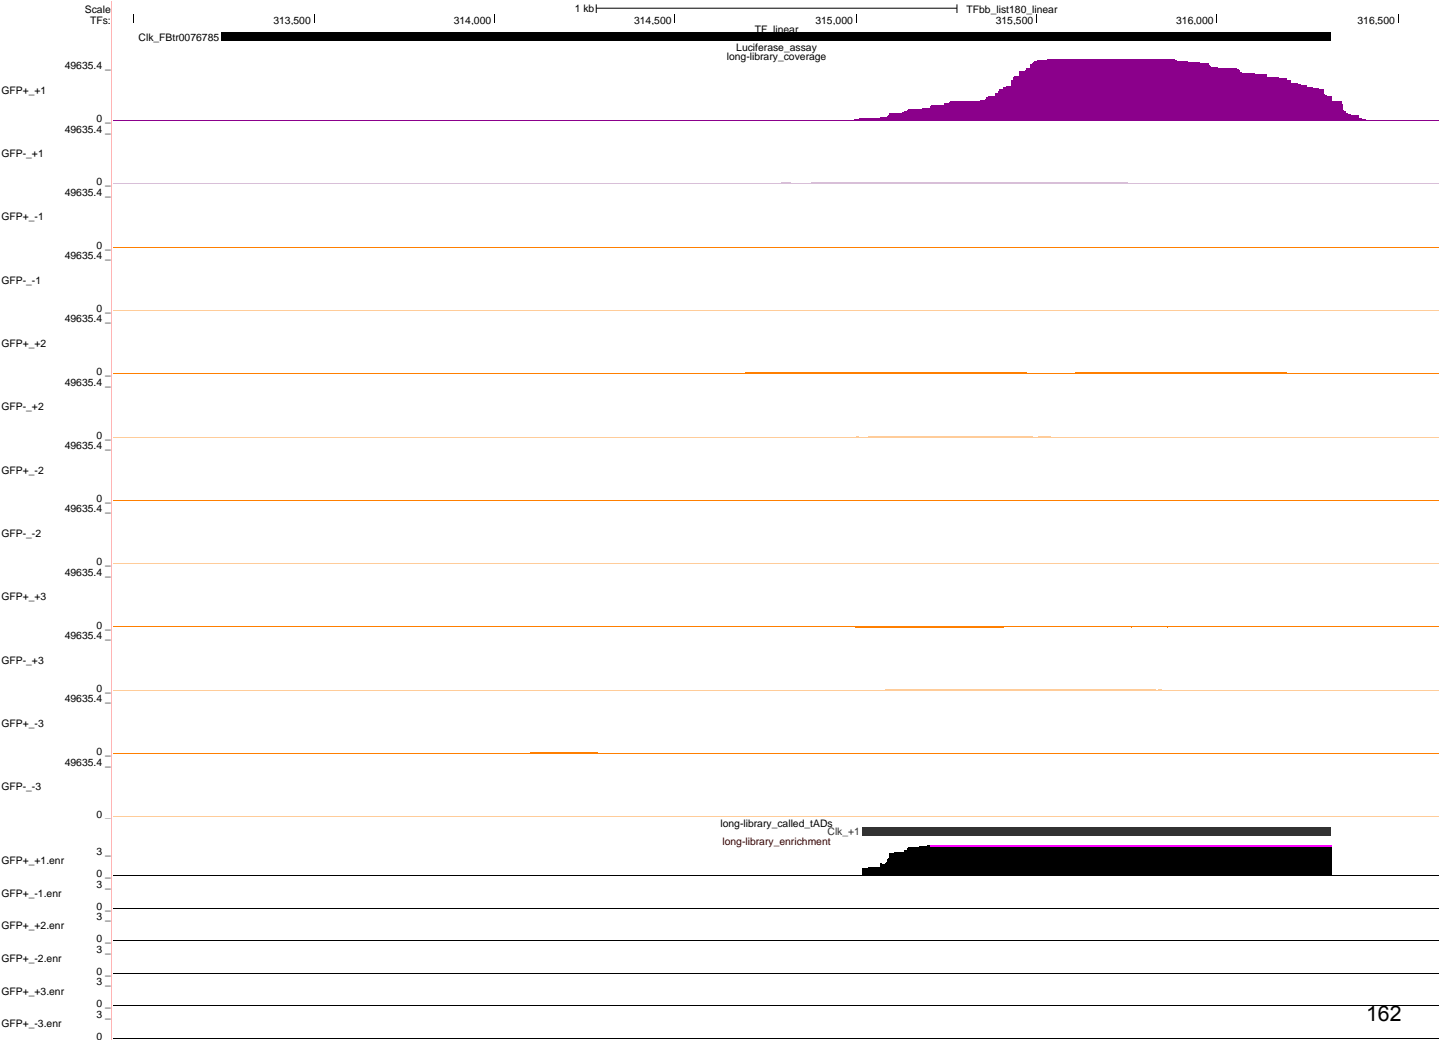

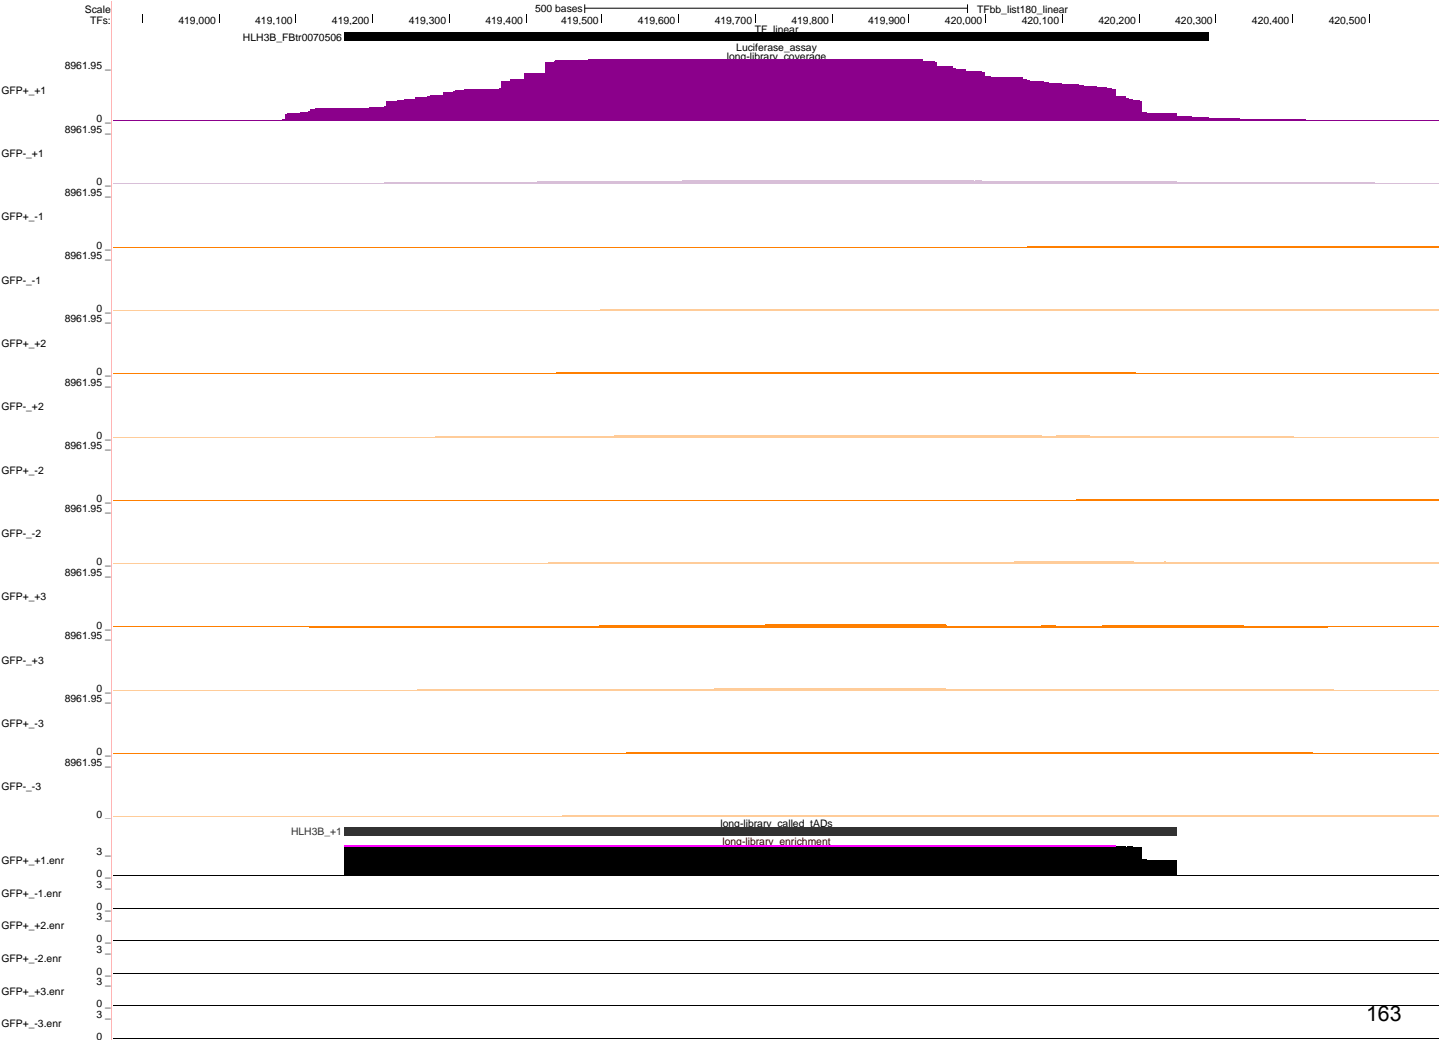

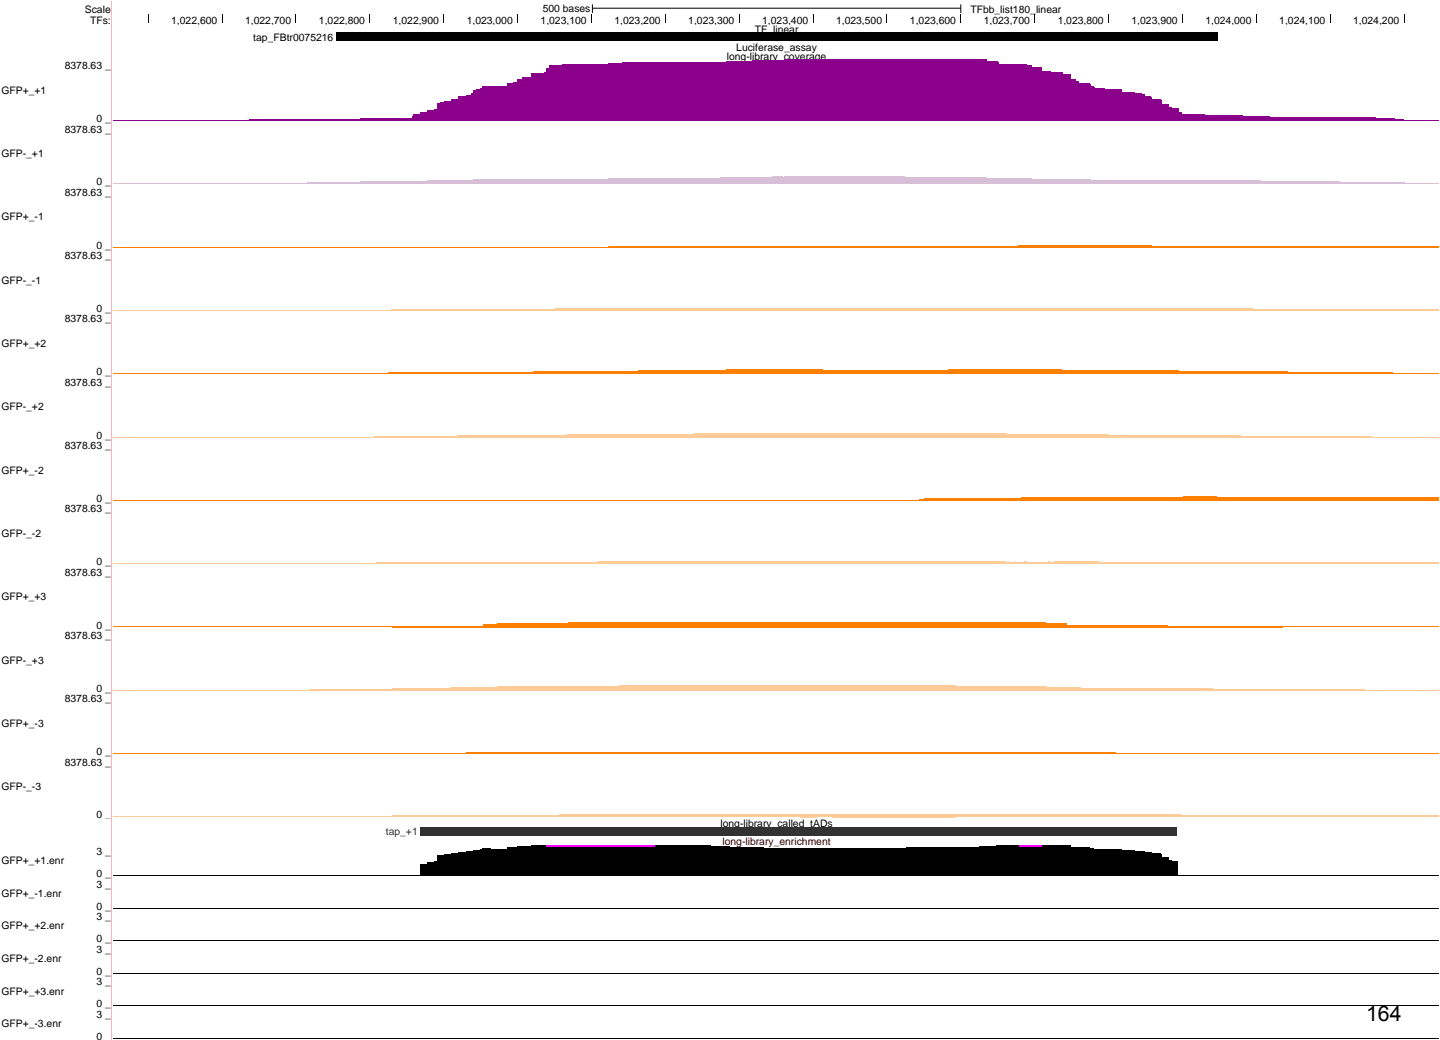



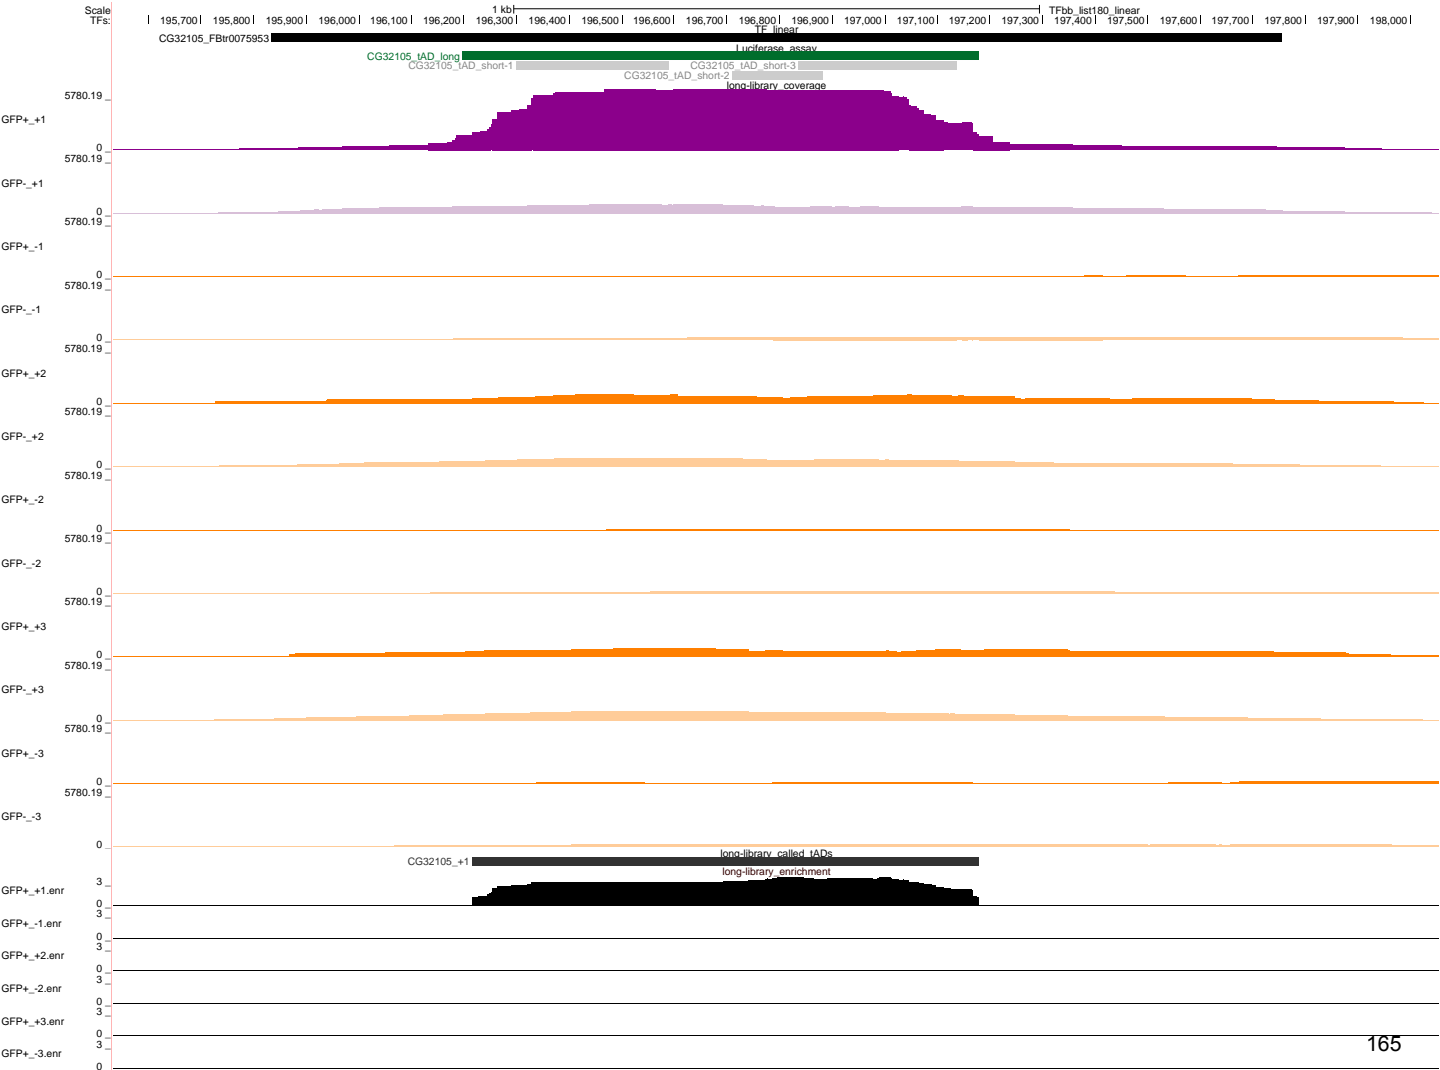



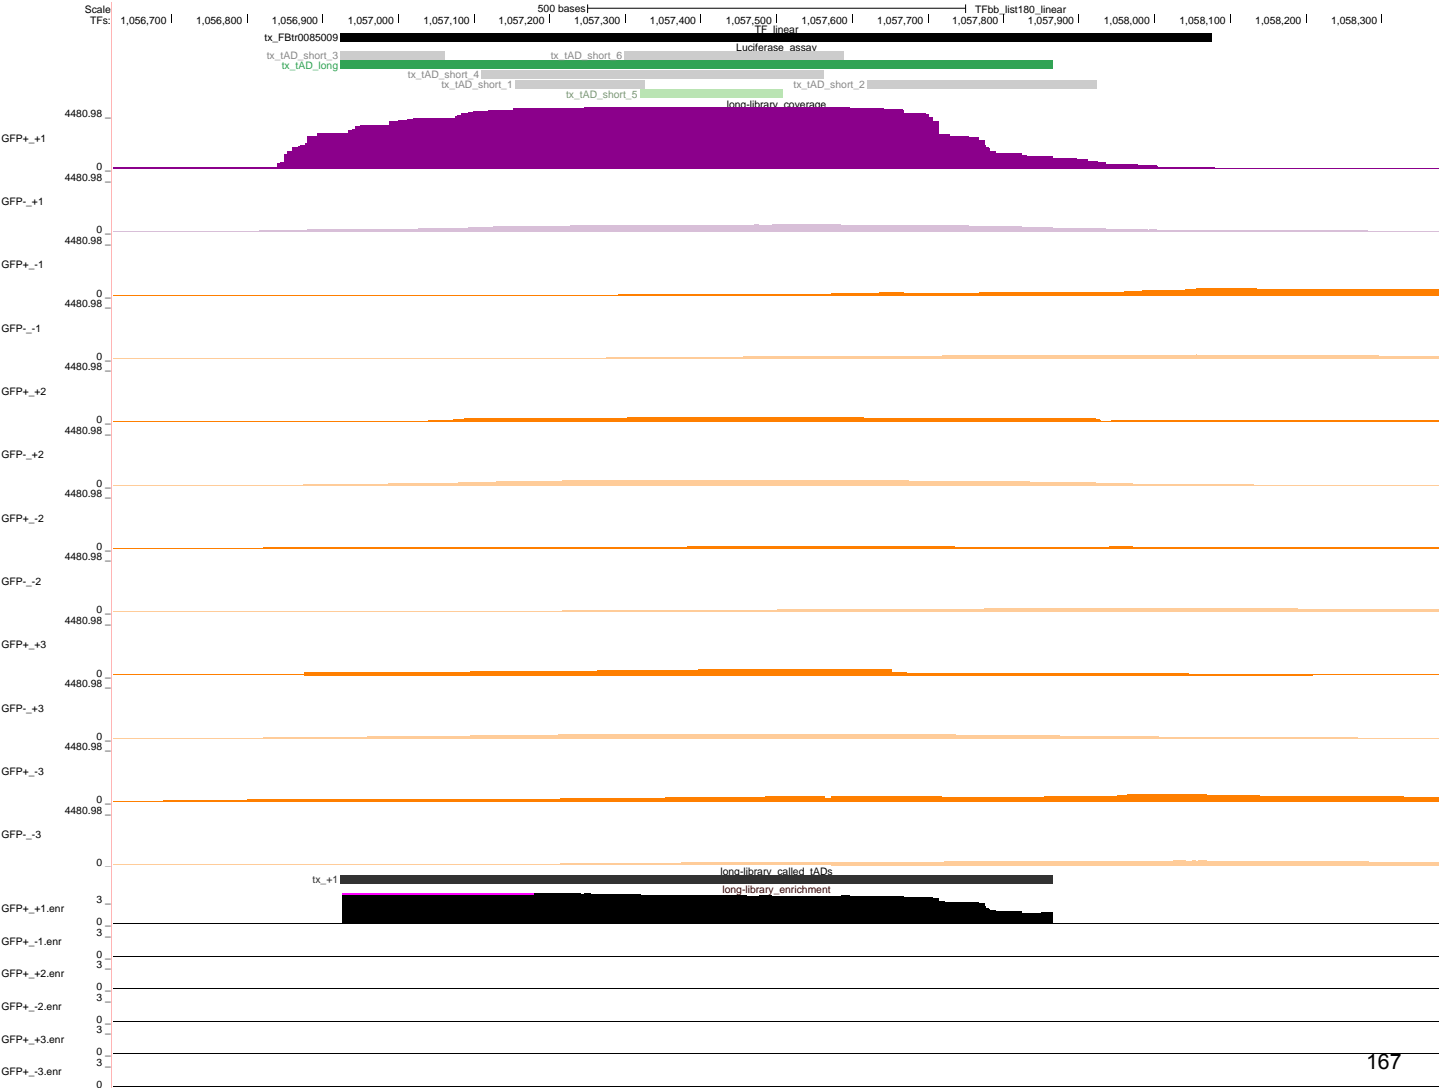

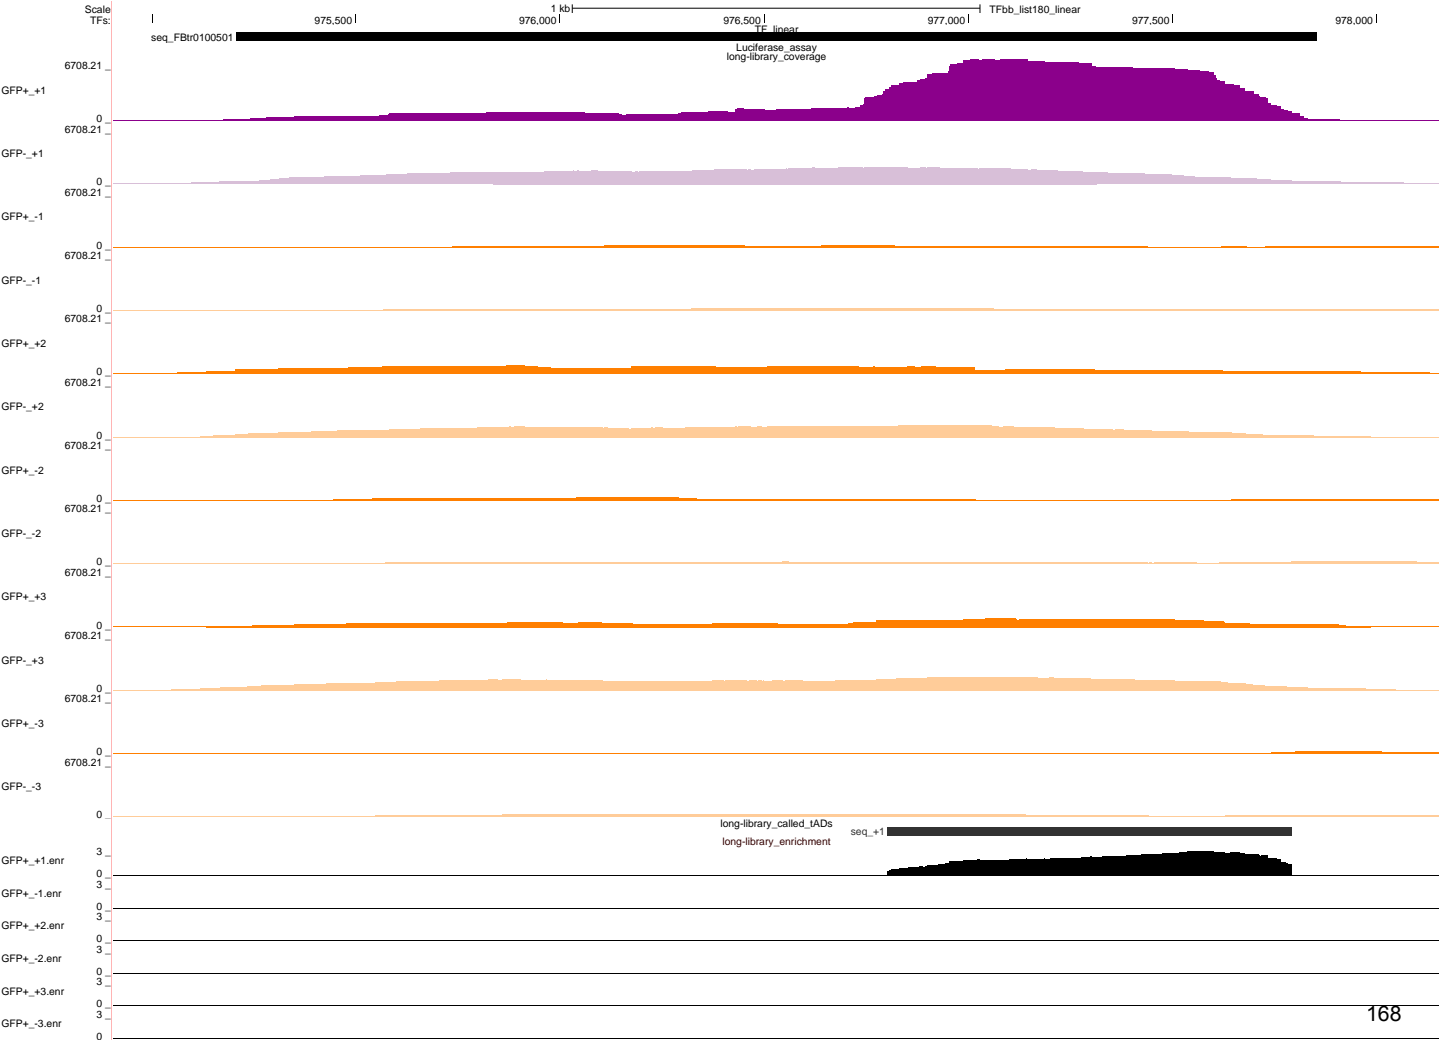

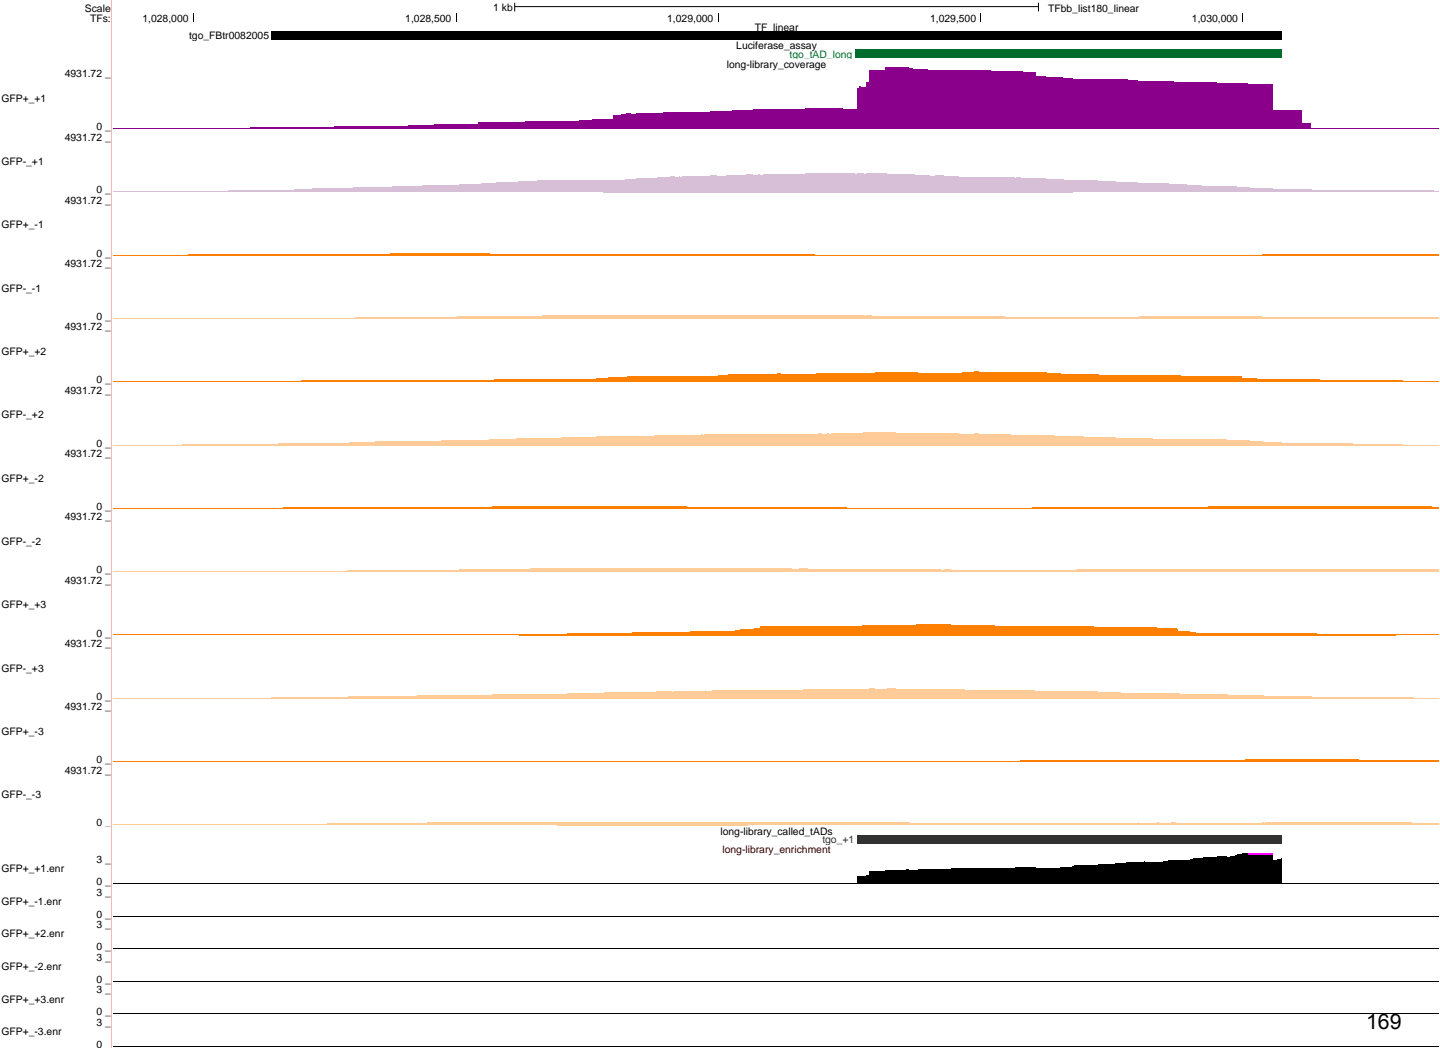

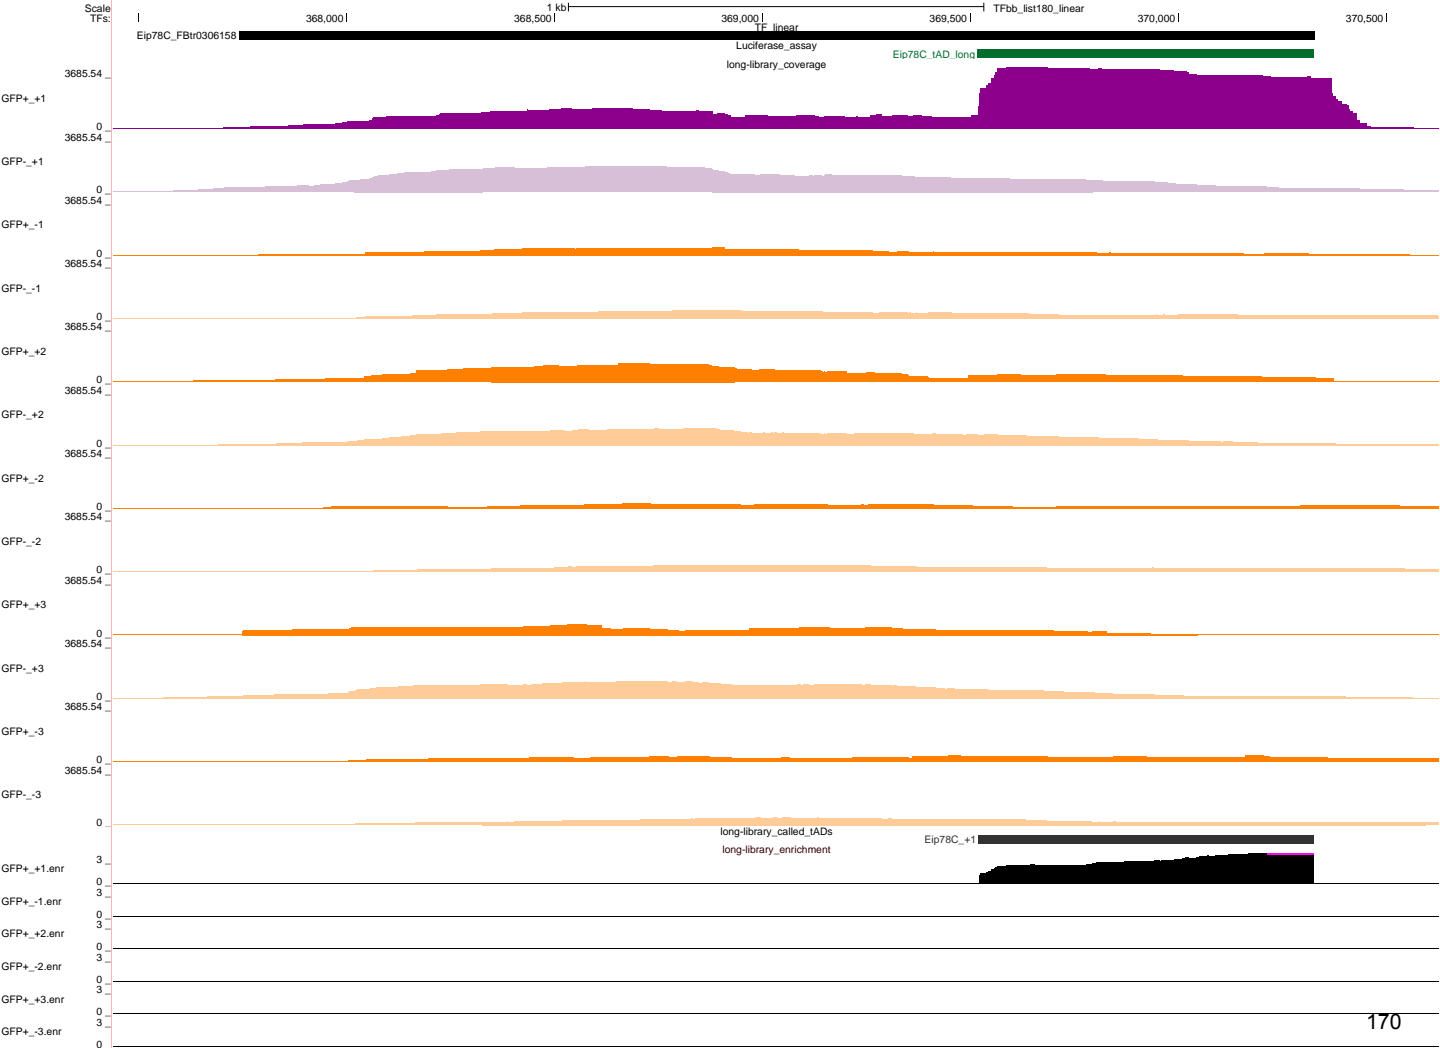



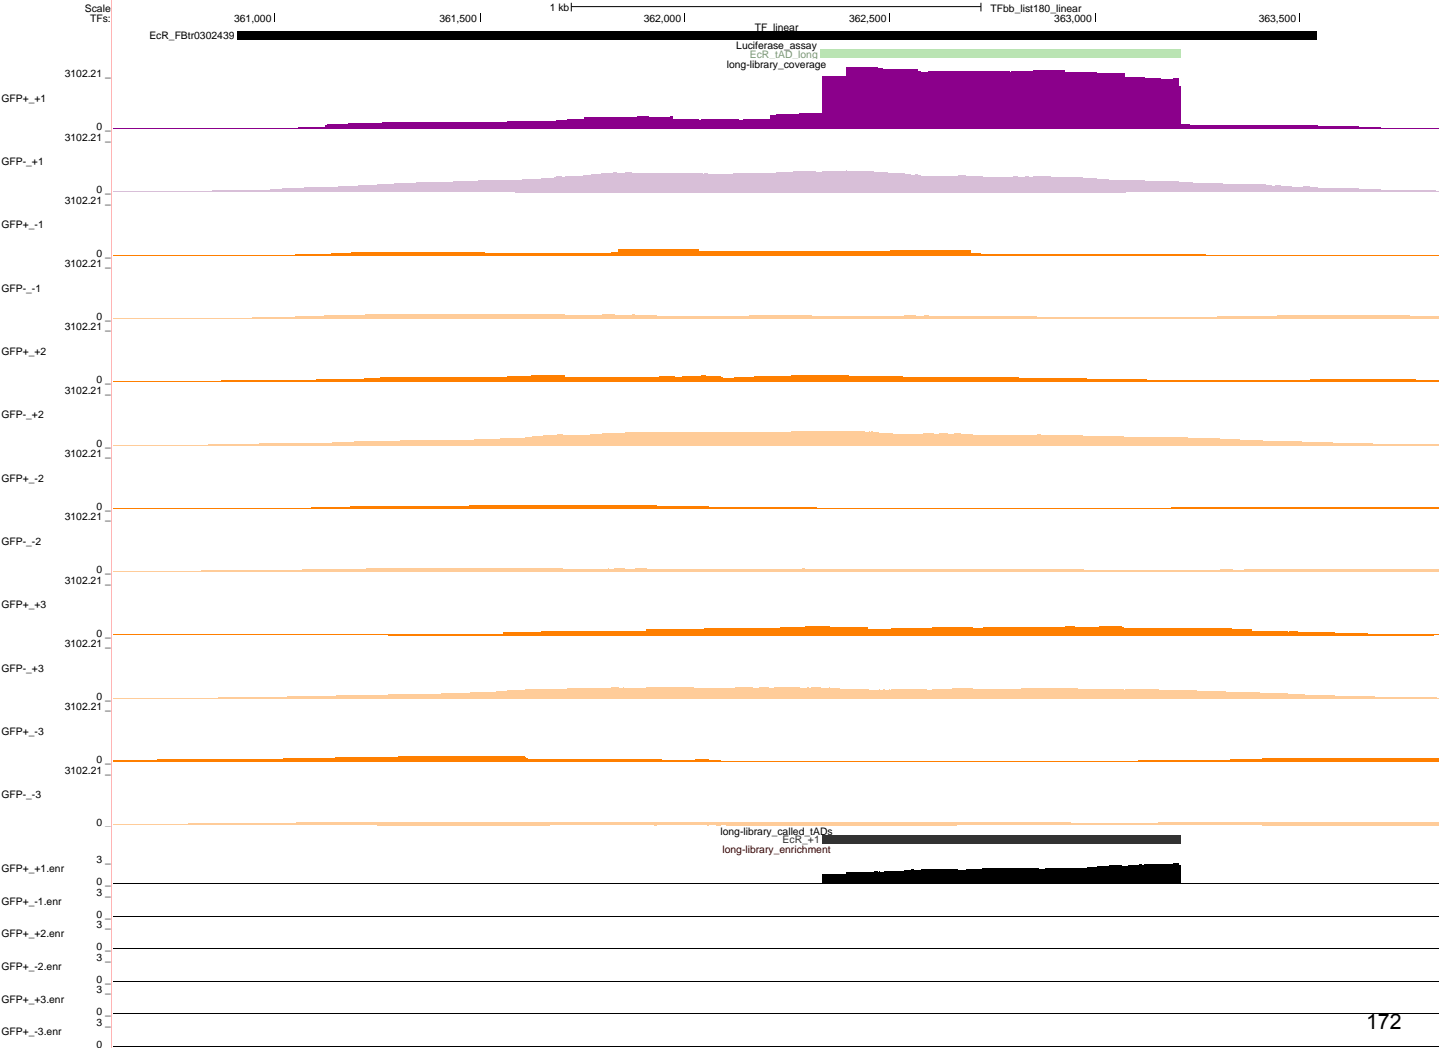



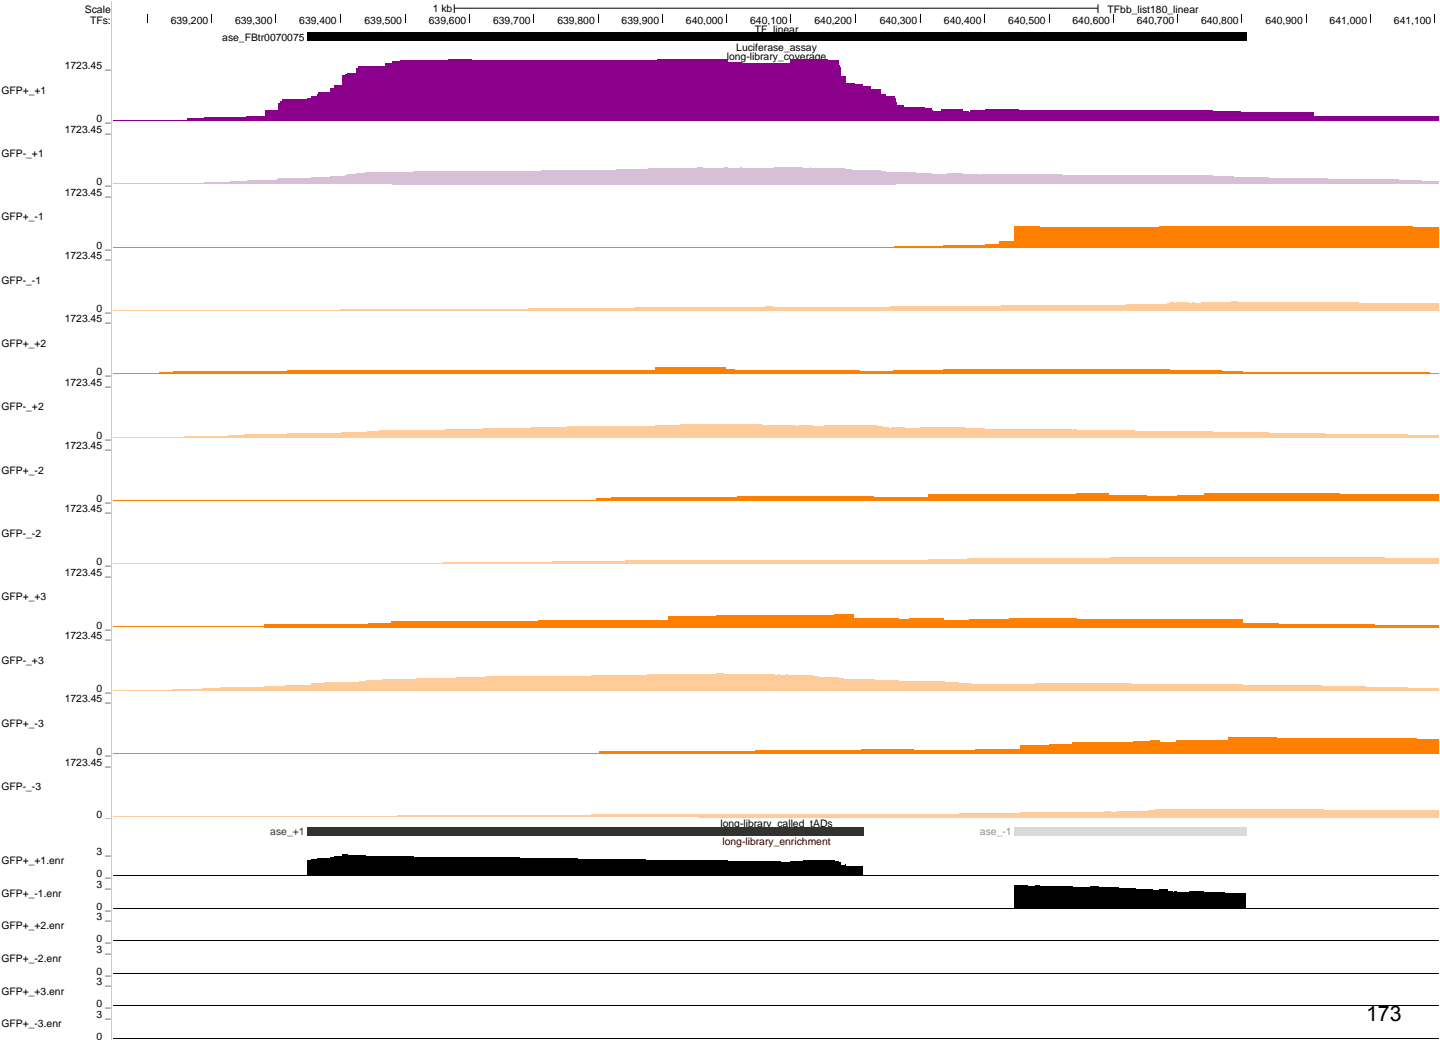

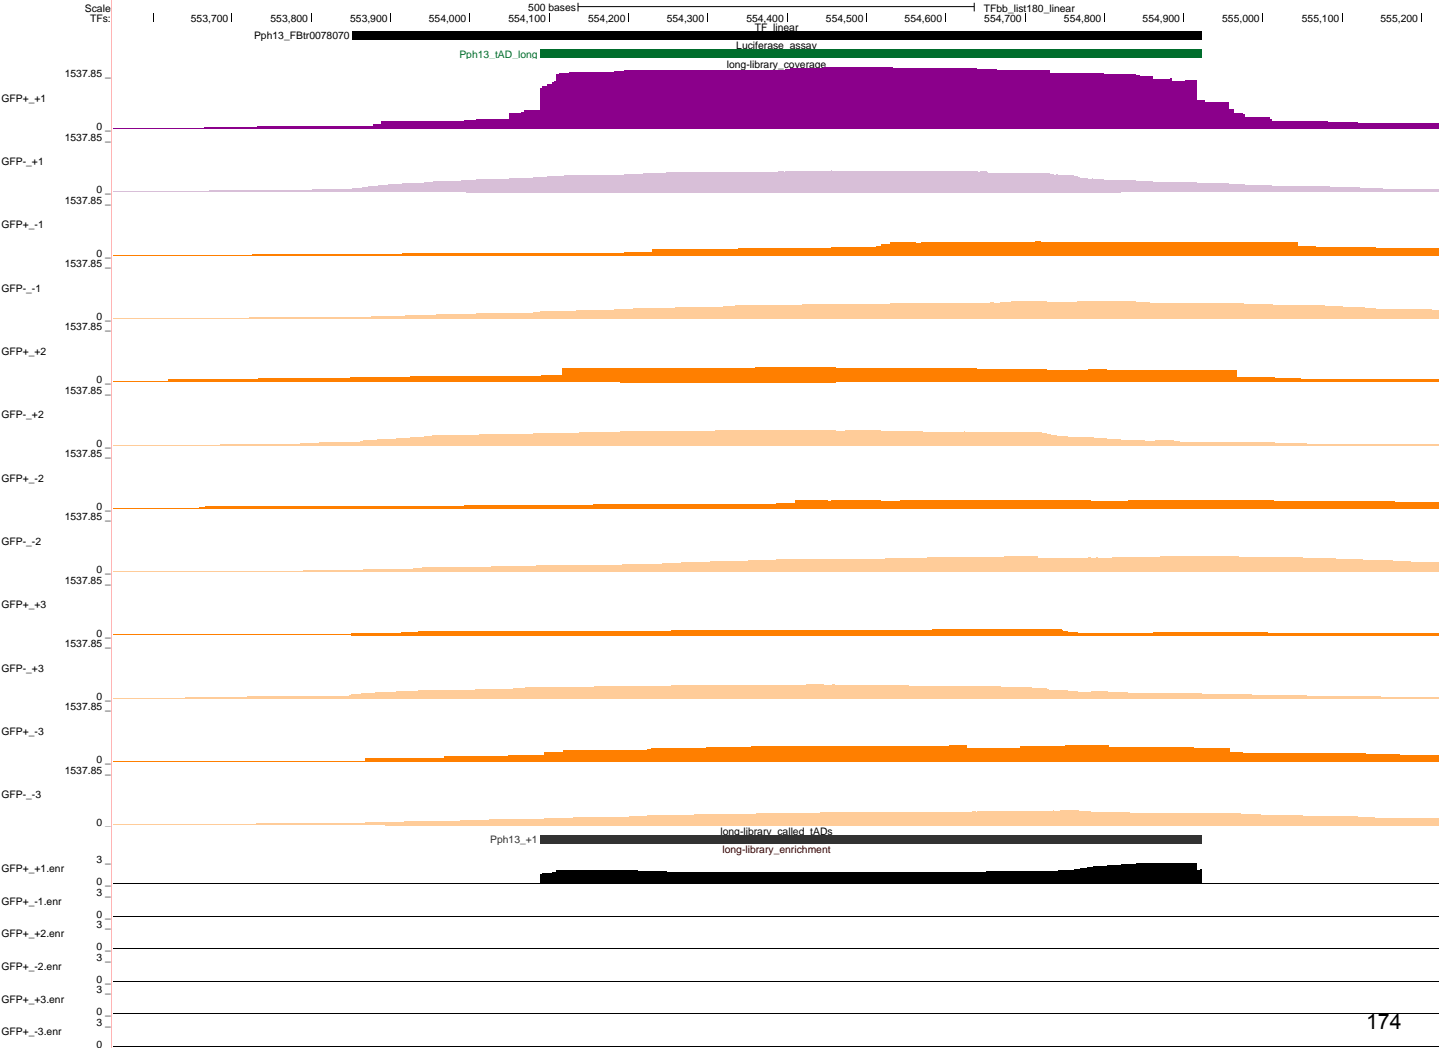

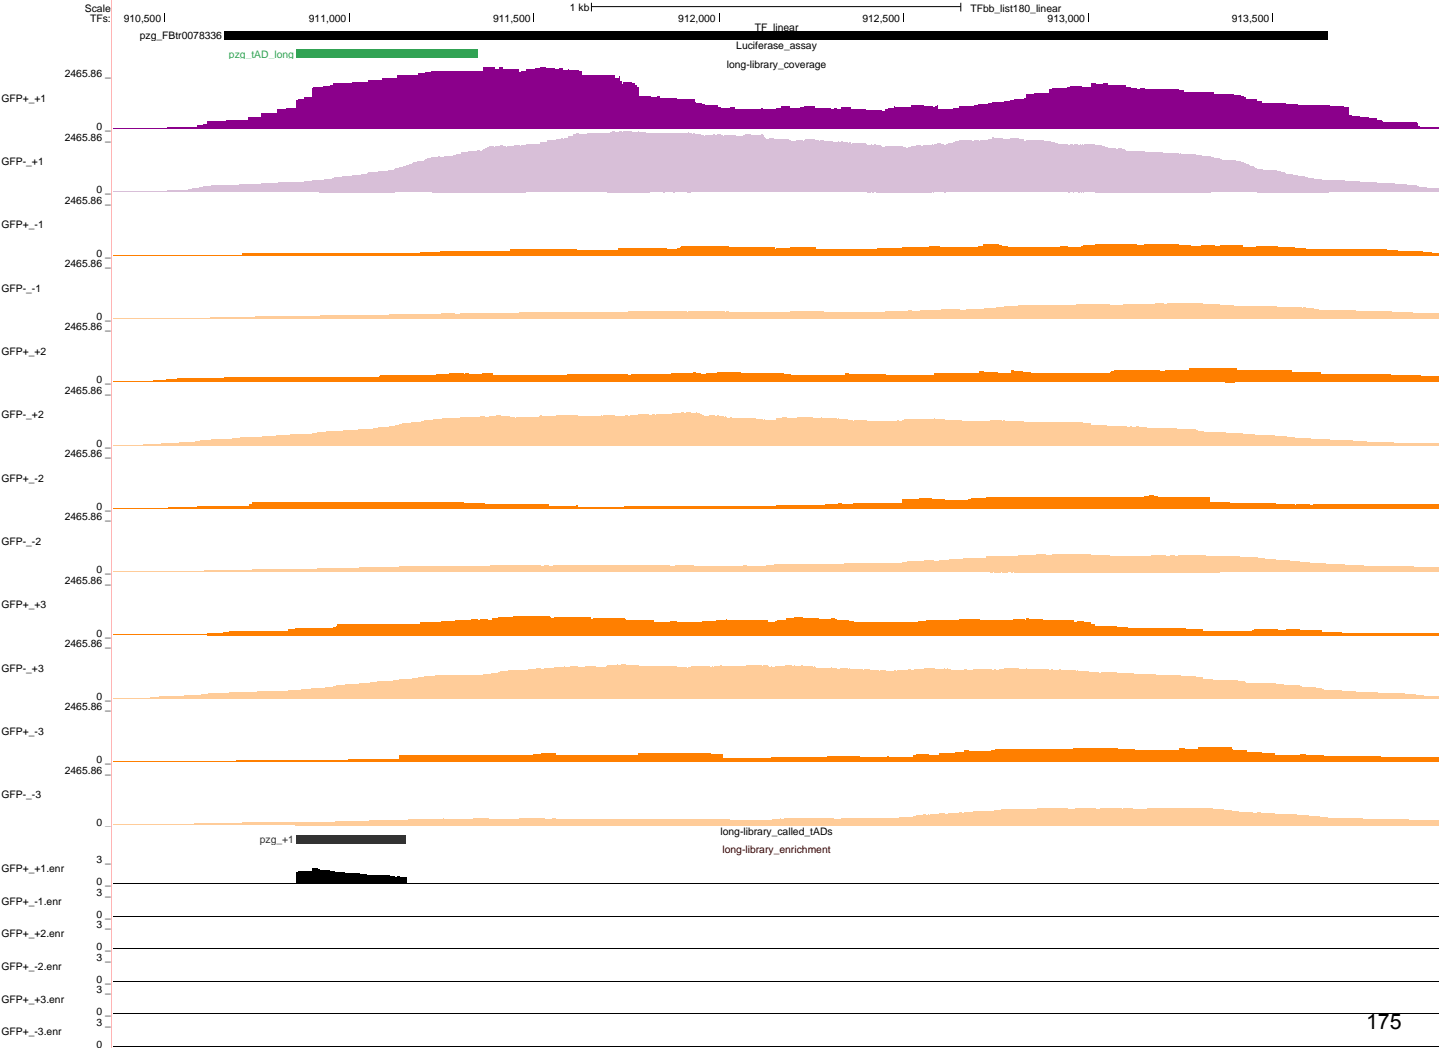

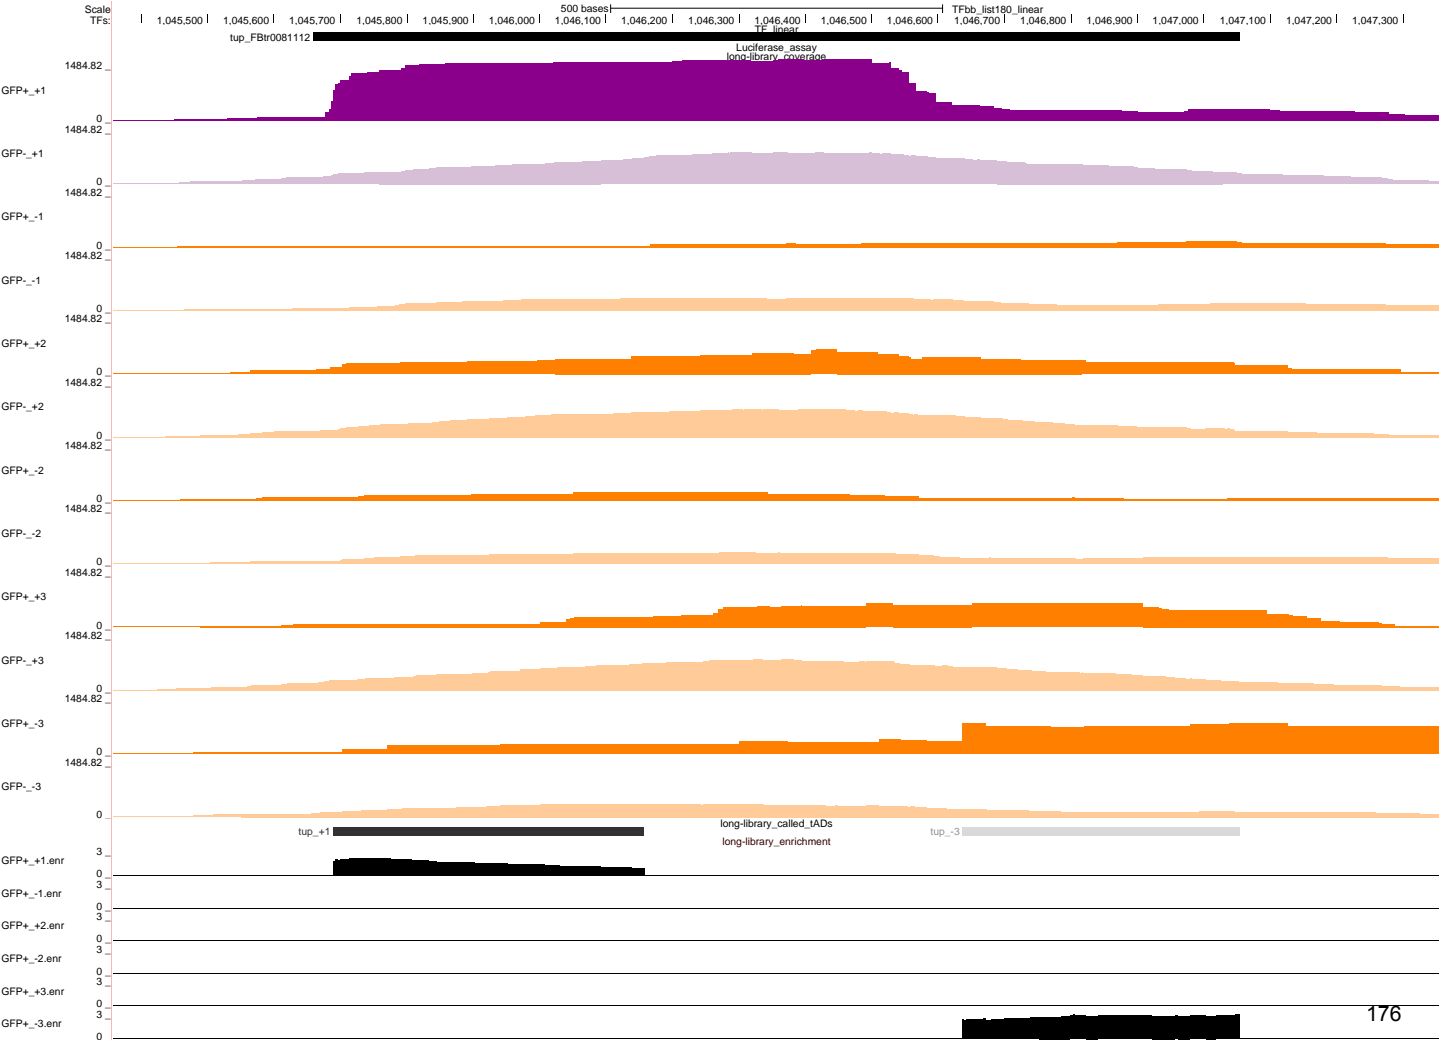

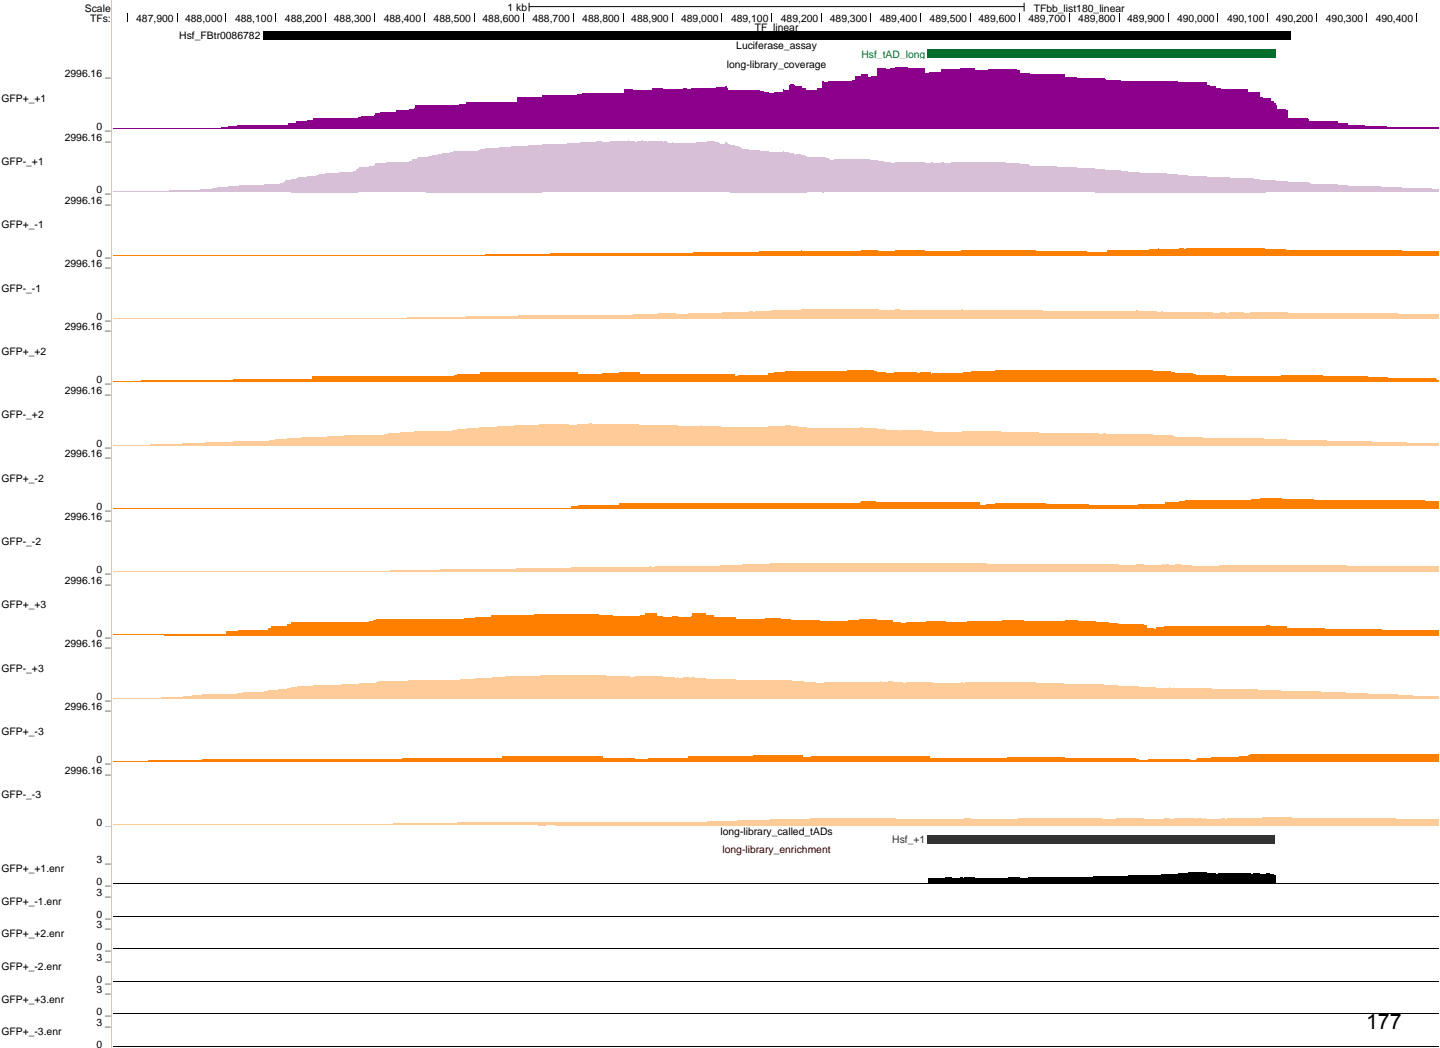

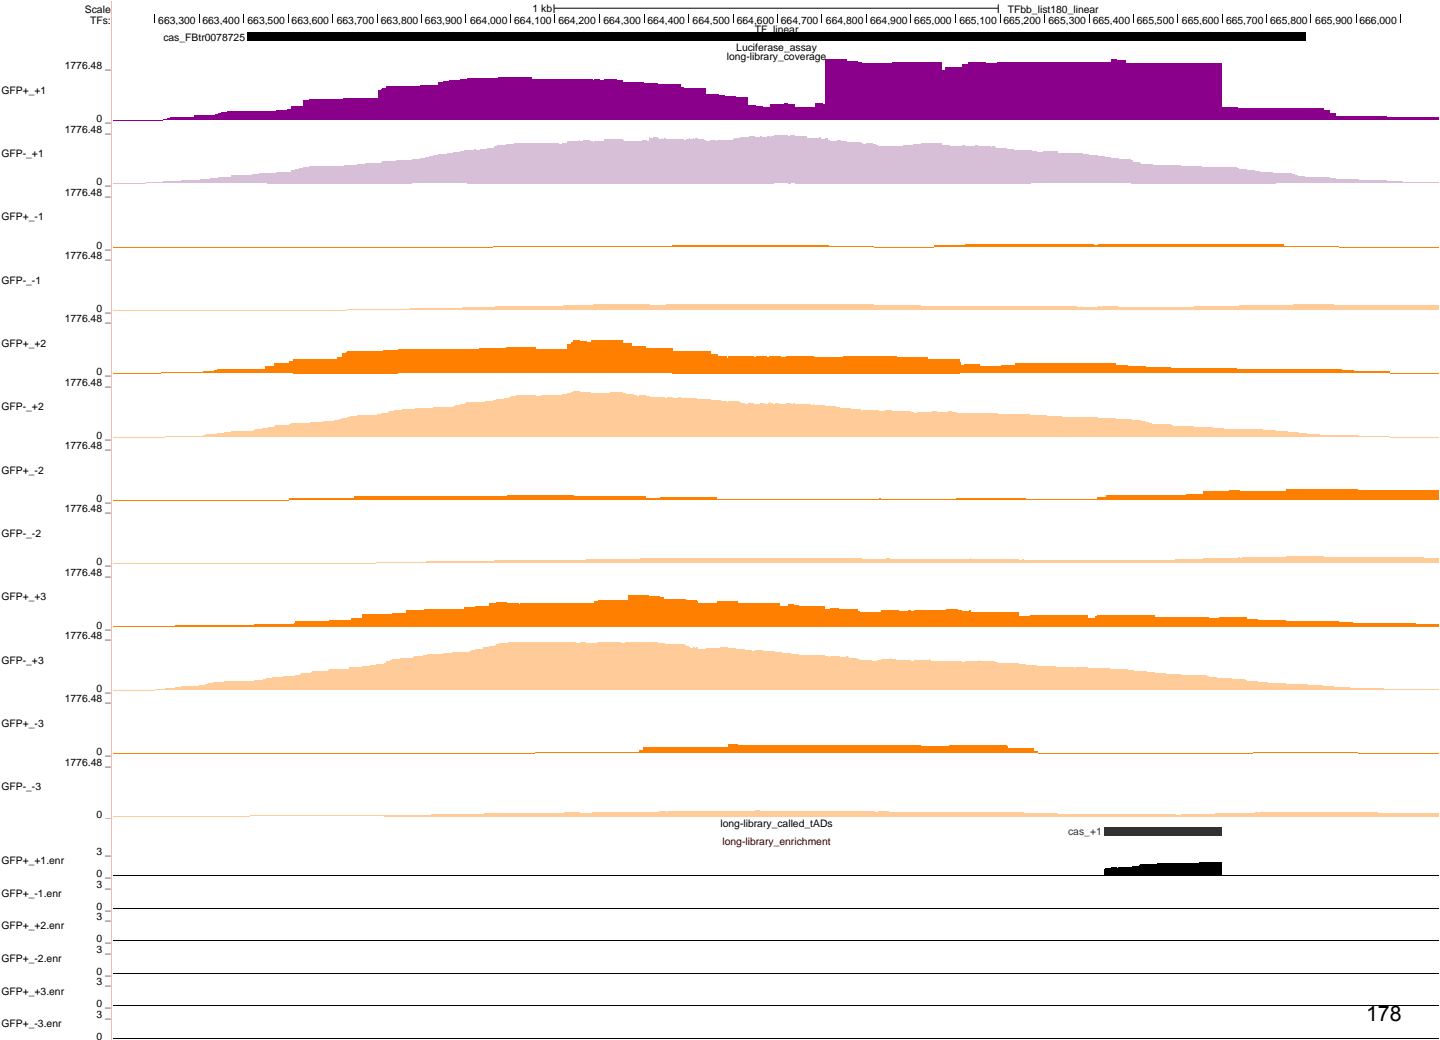

## **Appendix Figure S4**

13 long-fragment library non-native frame tADs

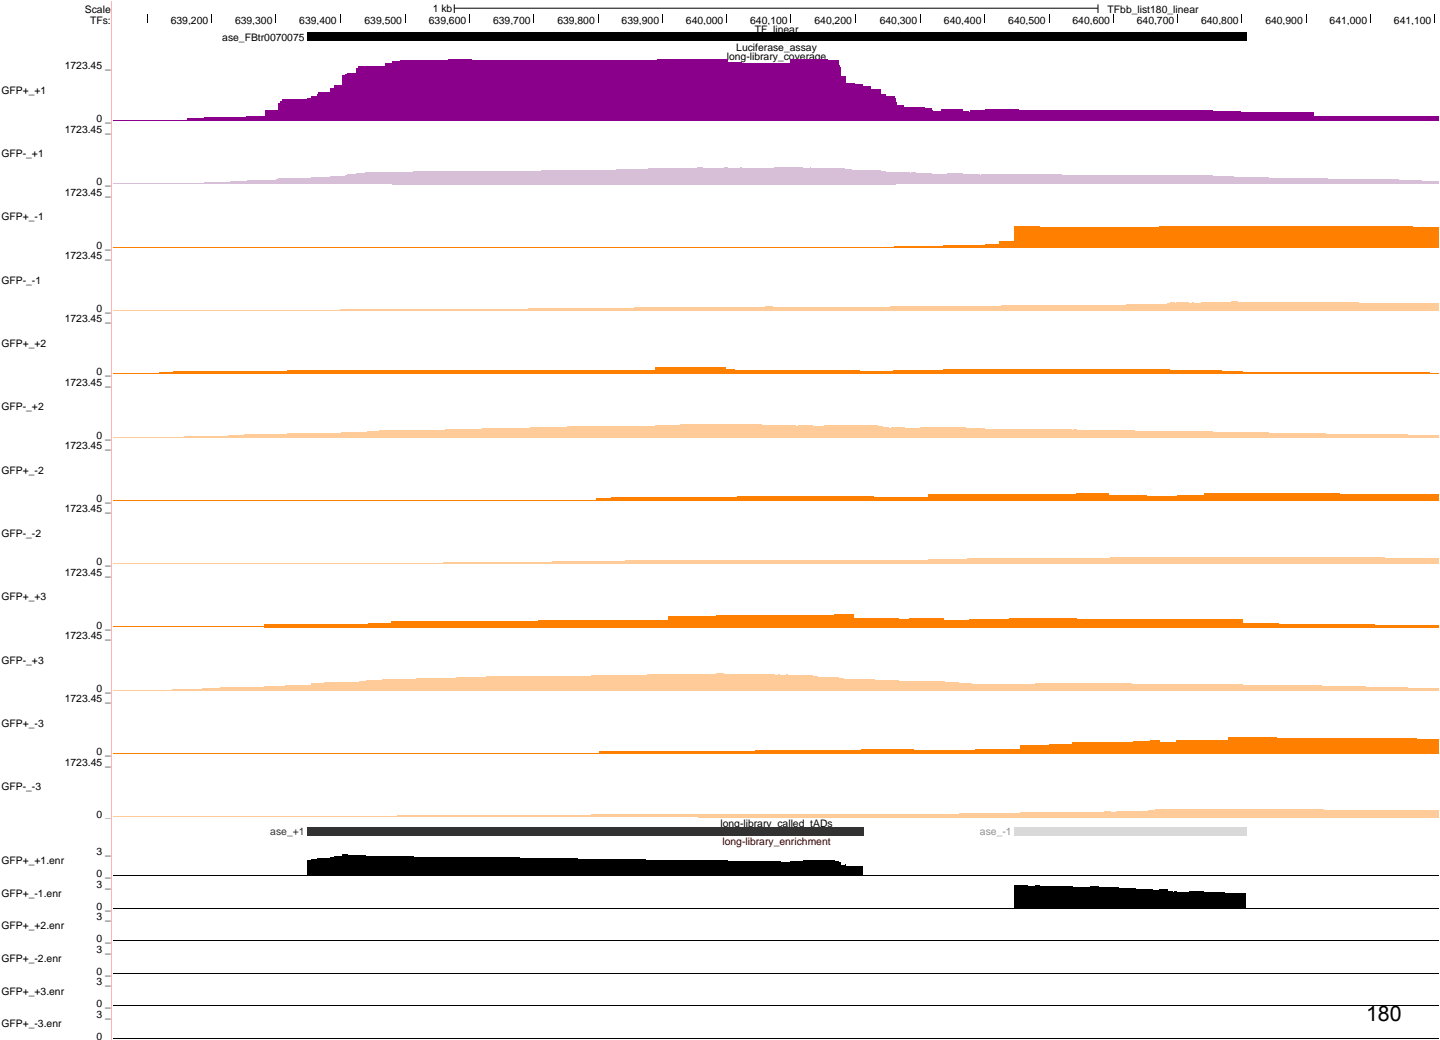





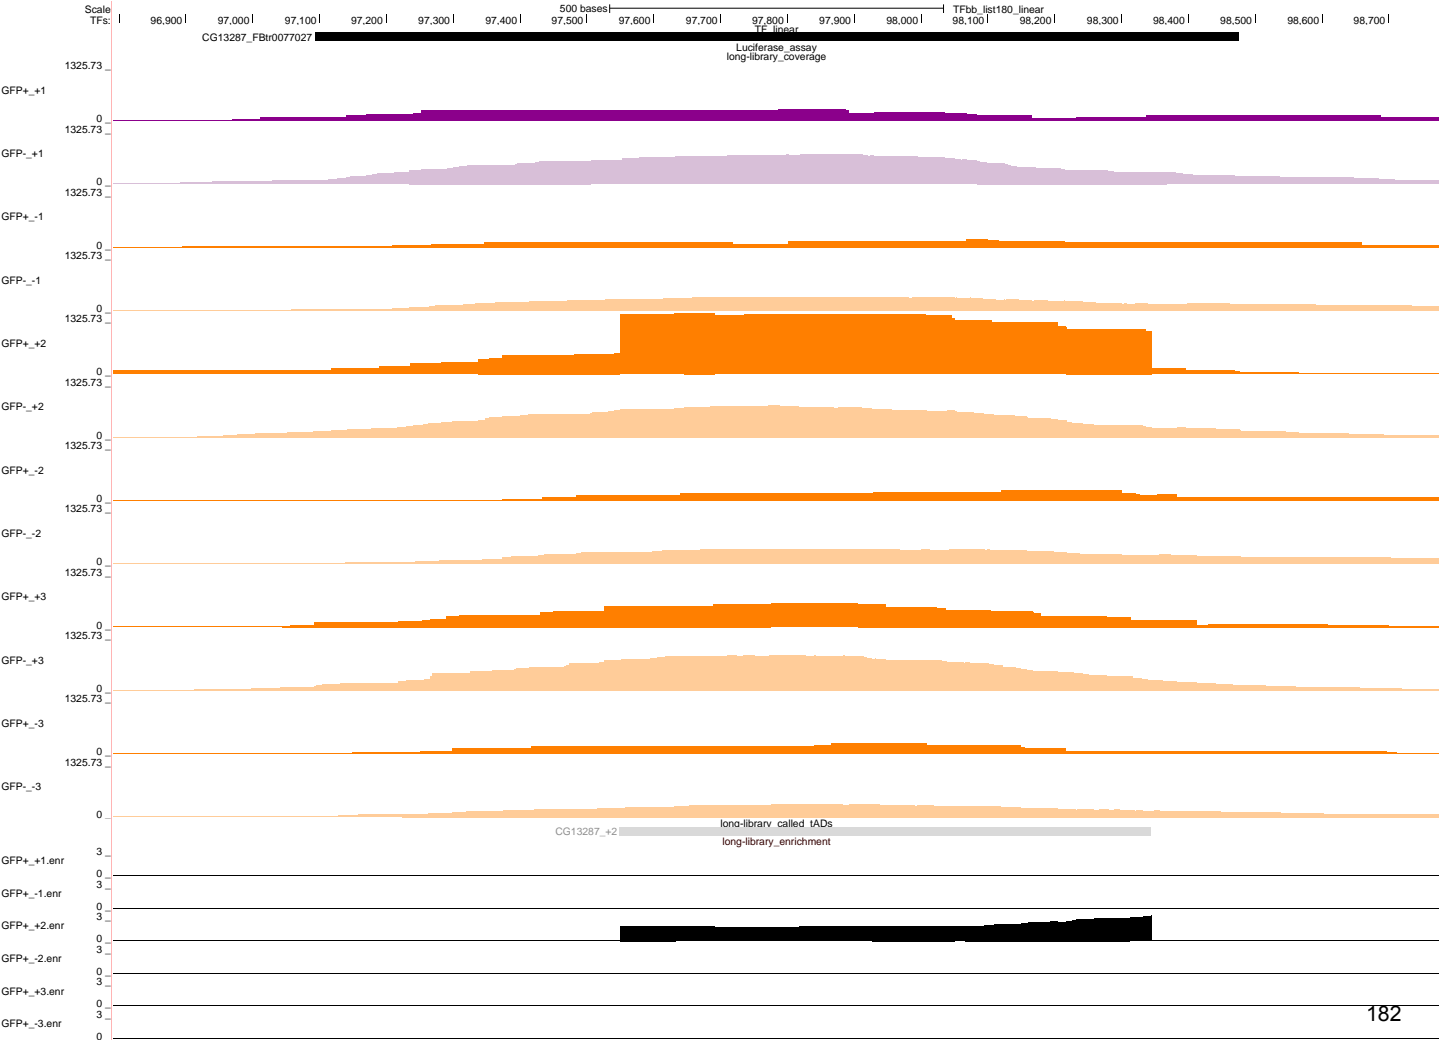

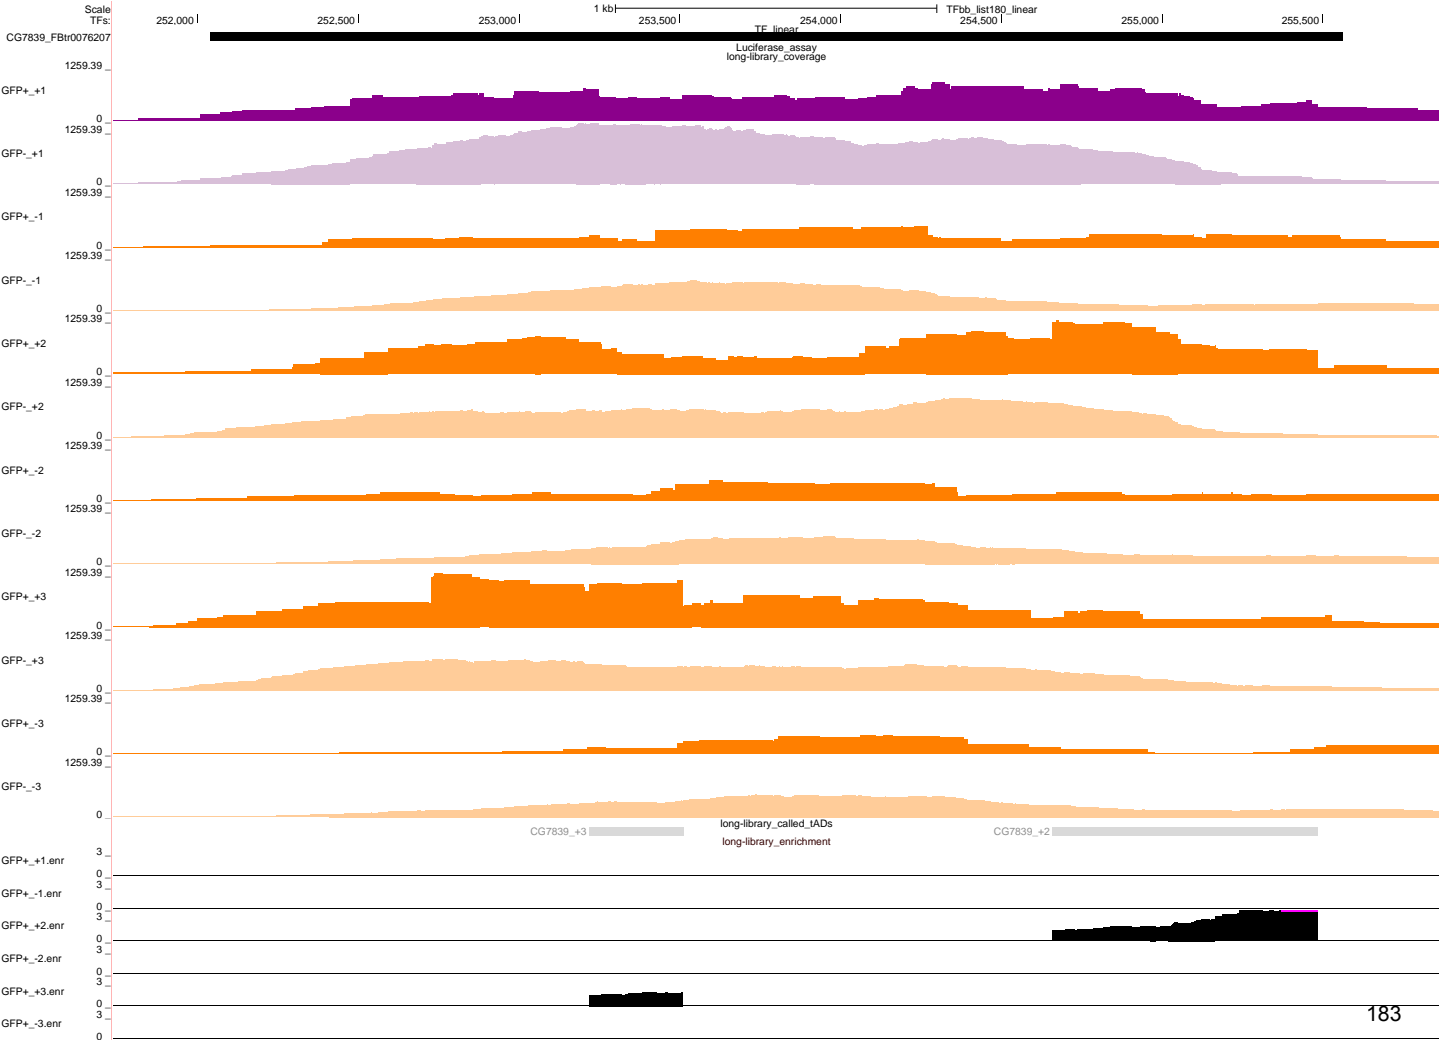

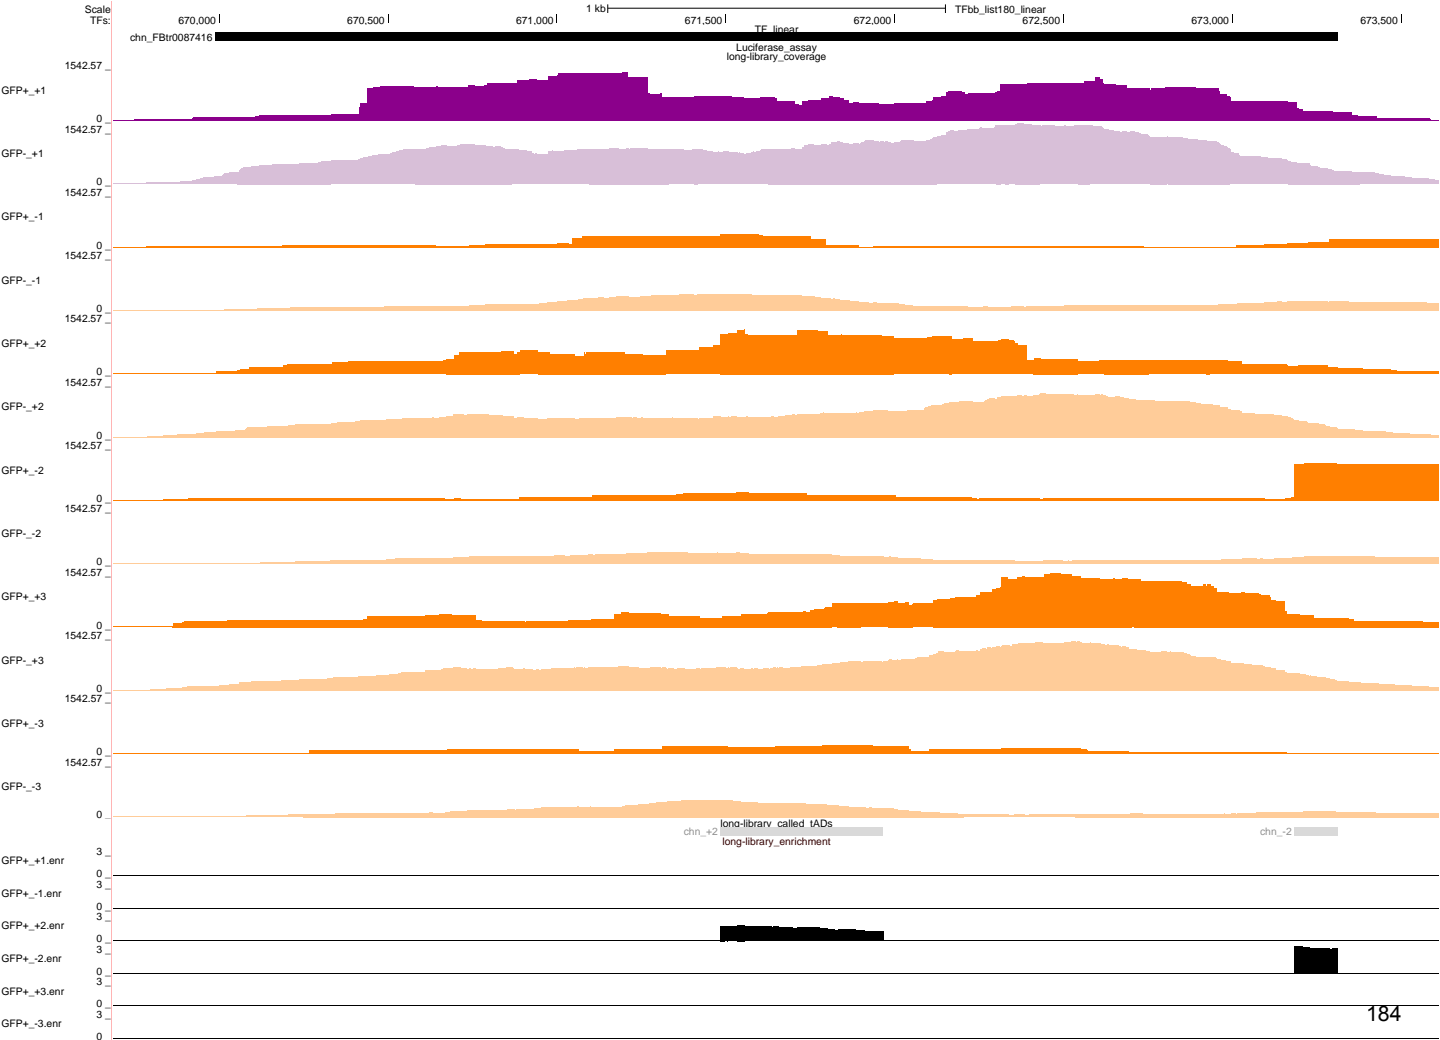

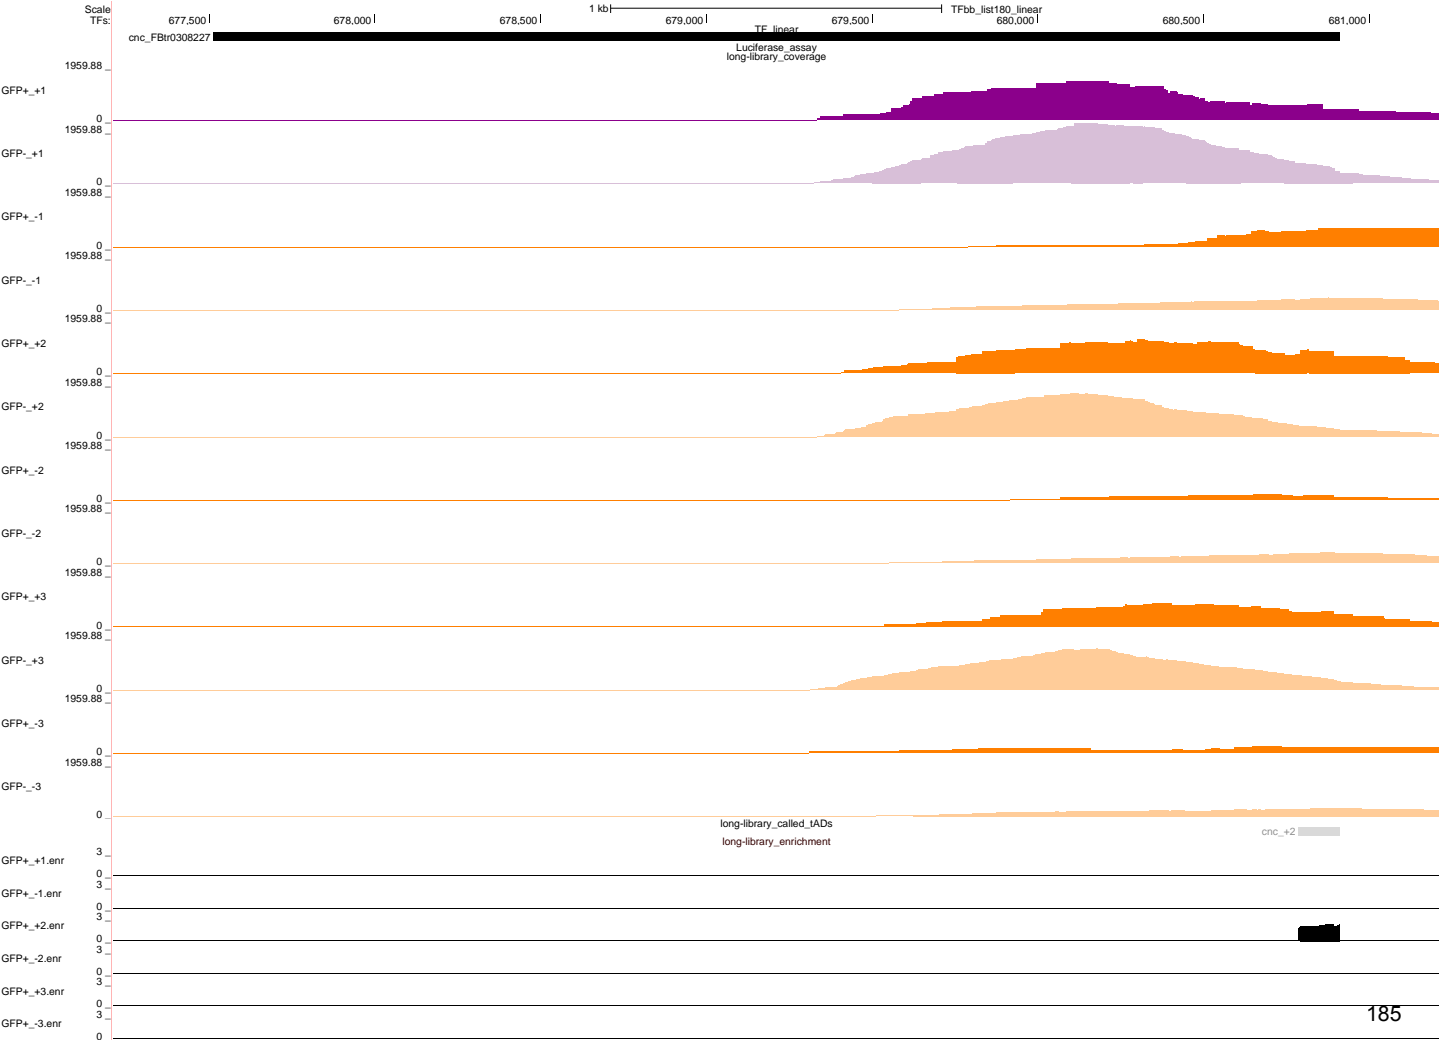

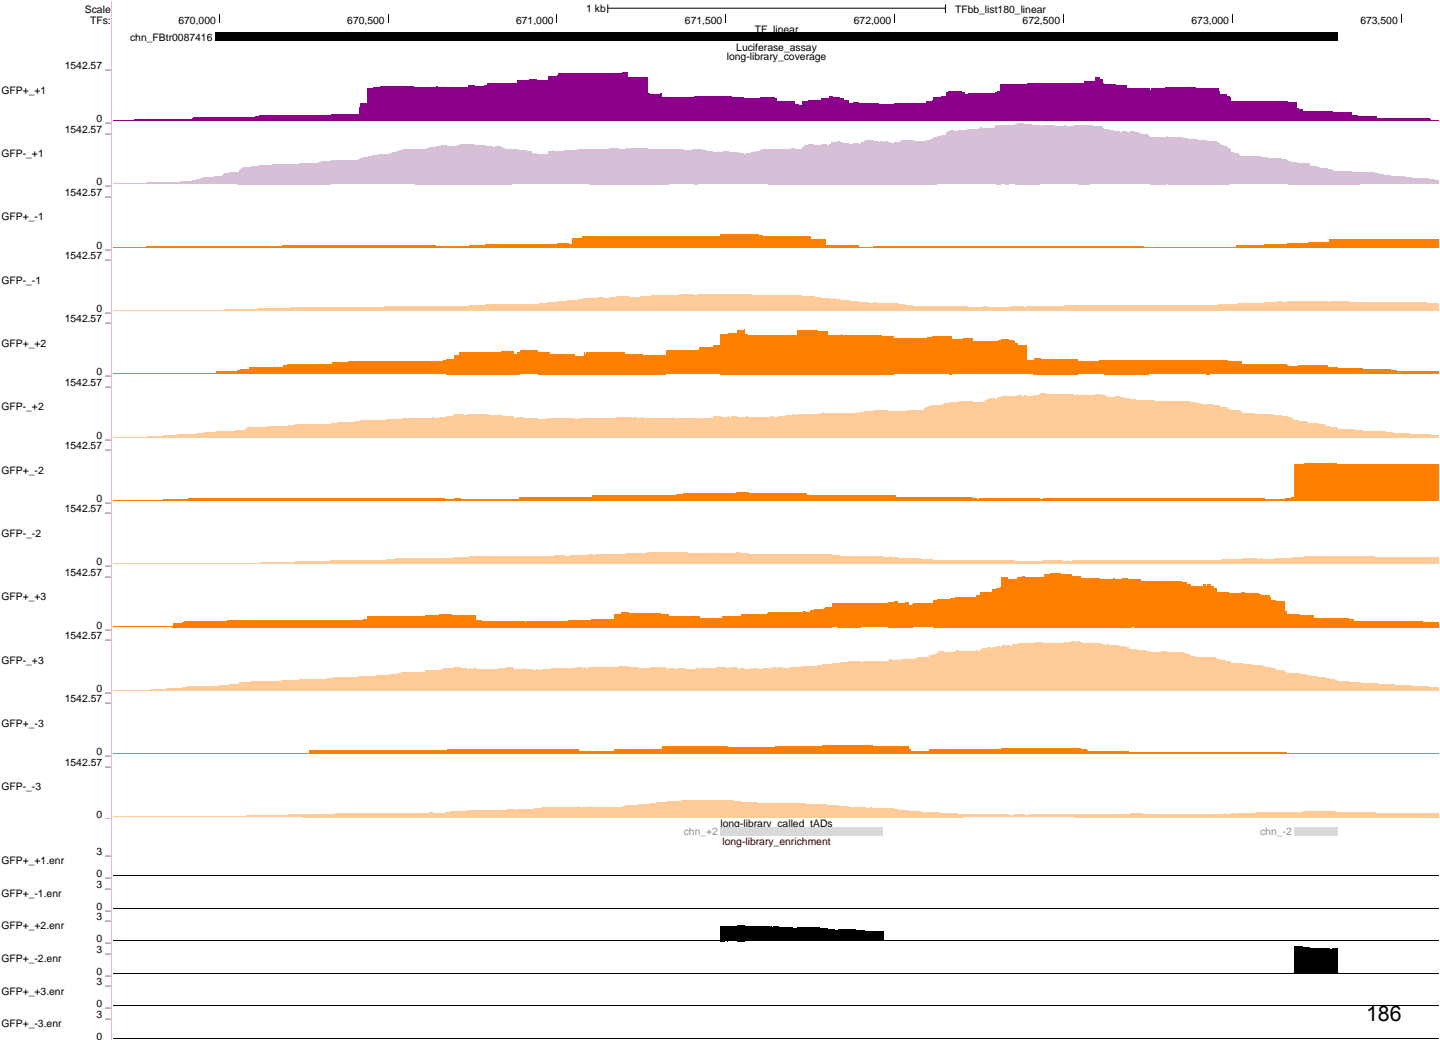

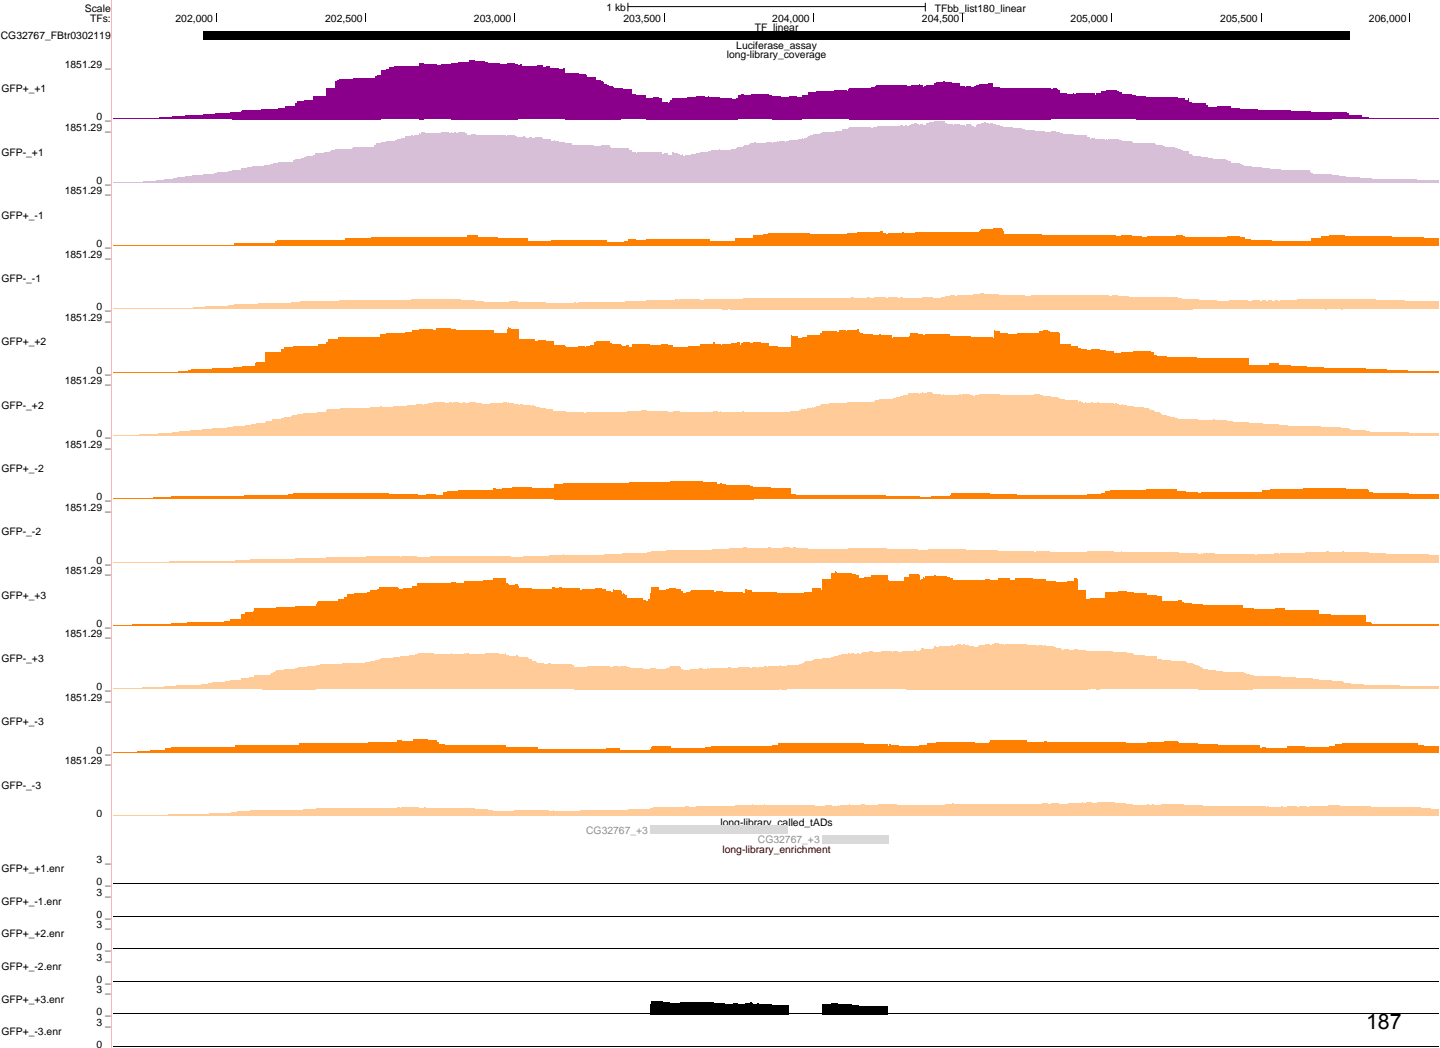

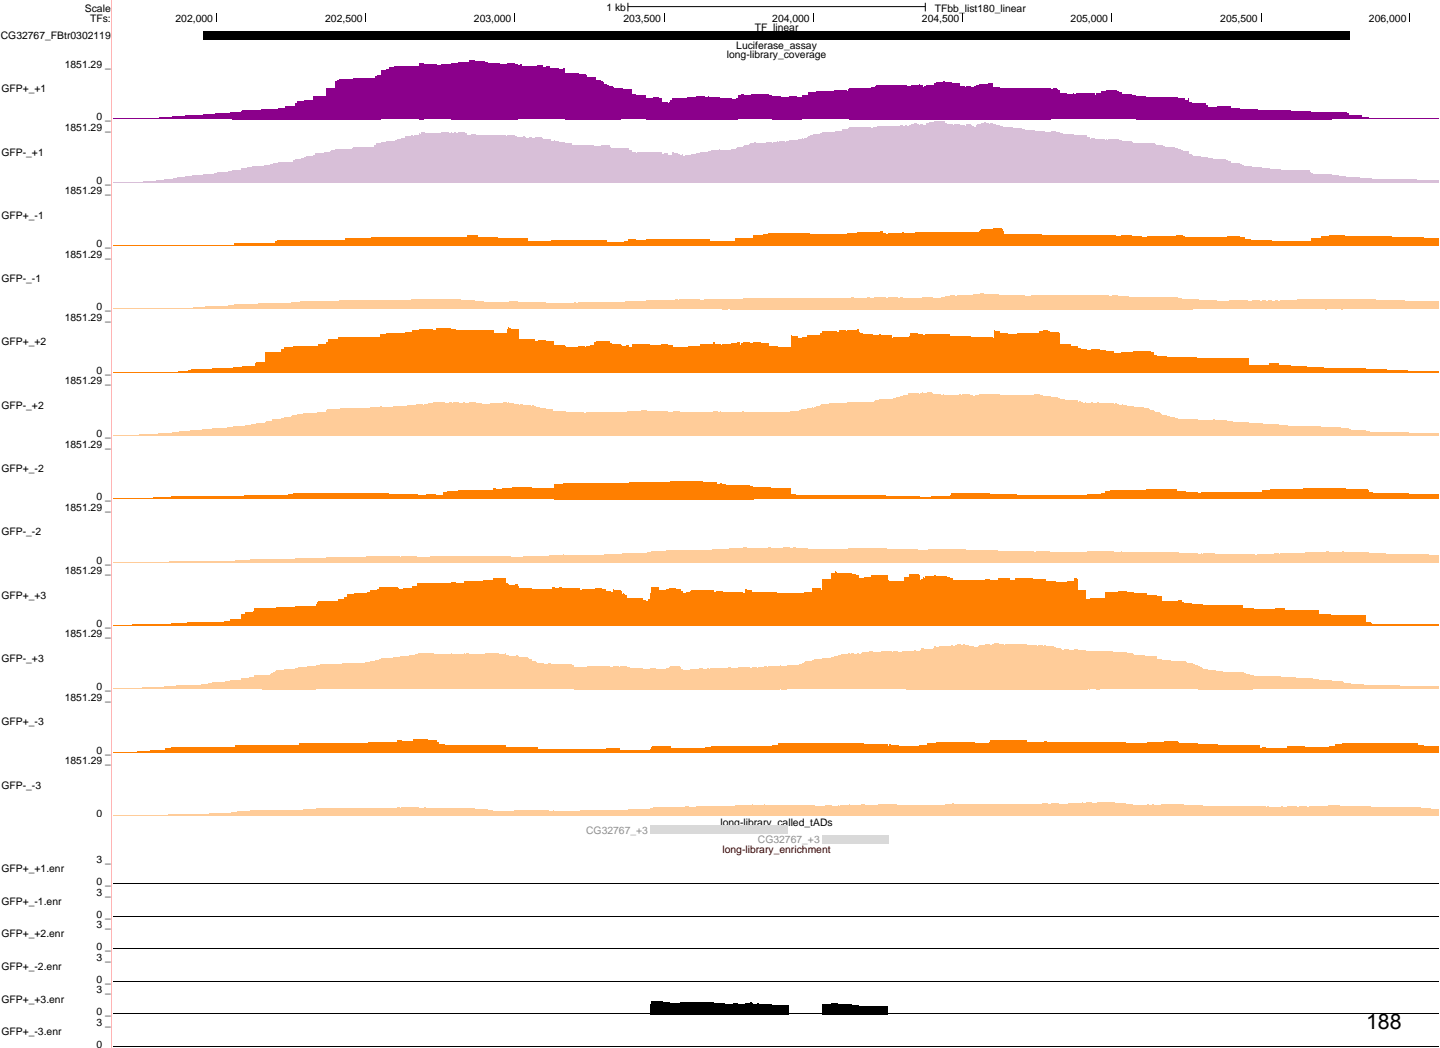



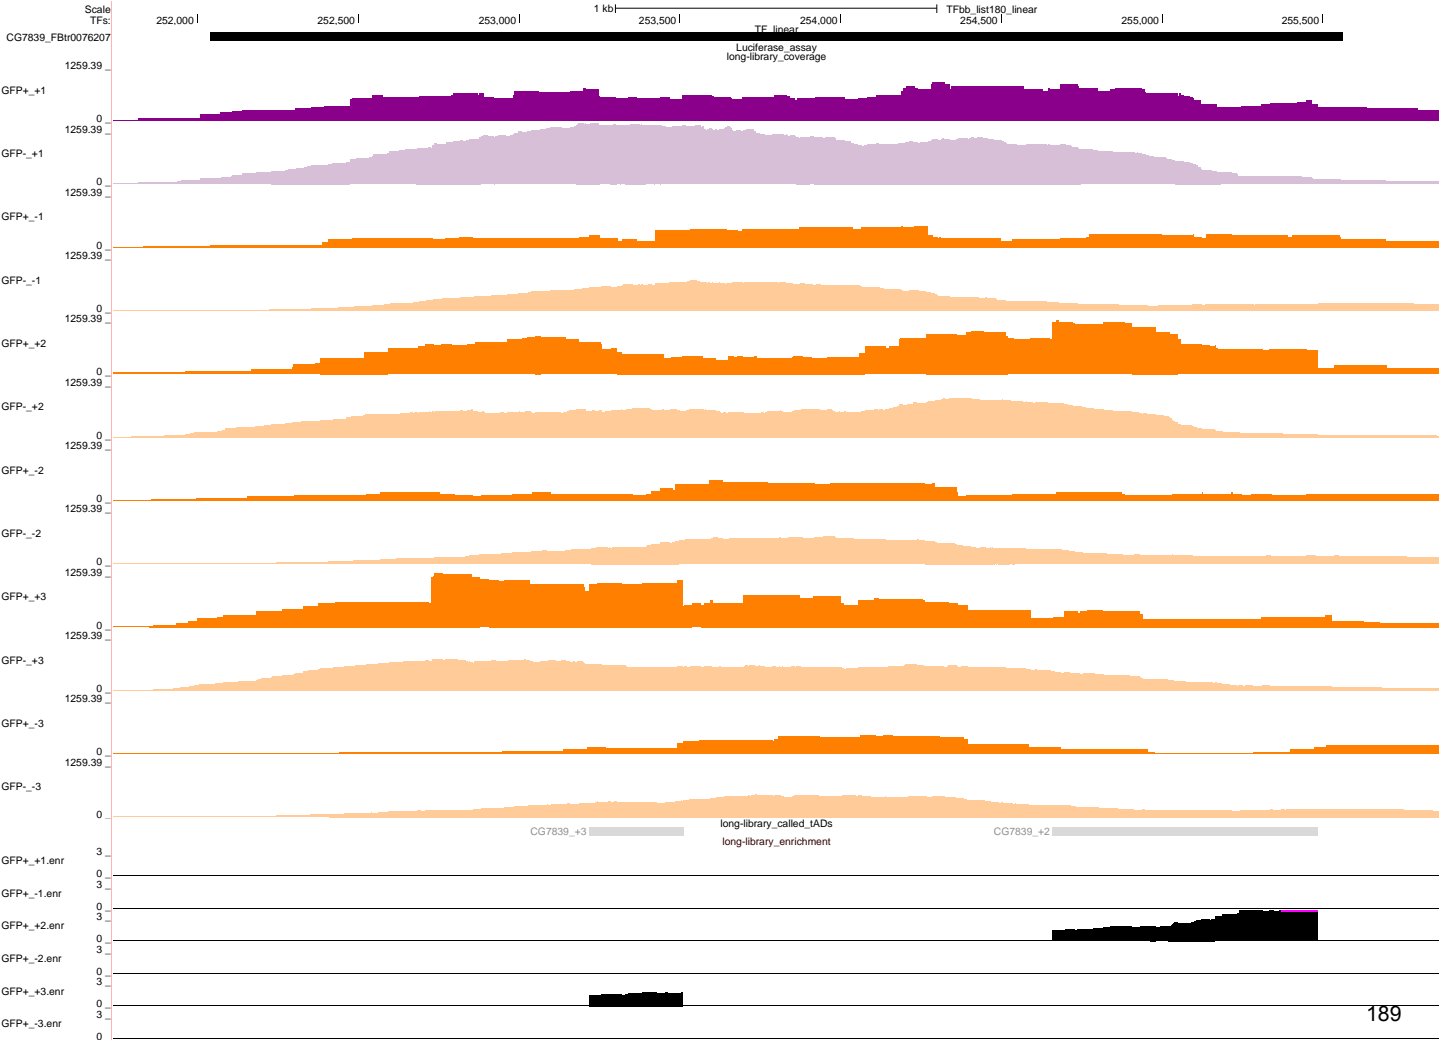

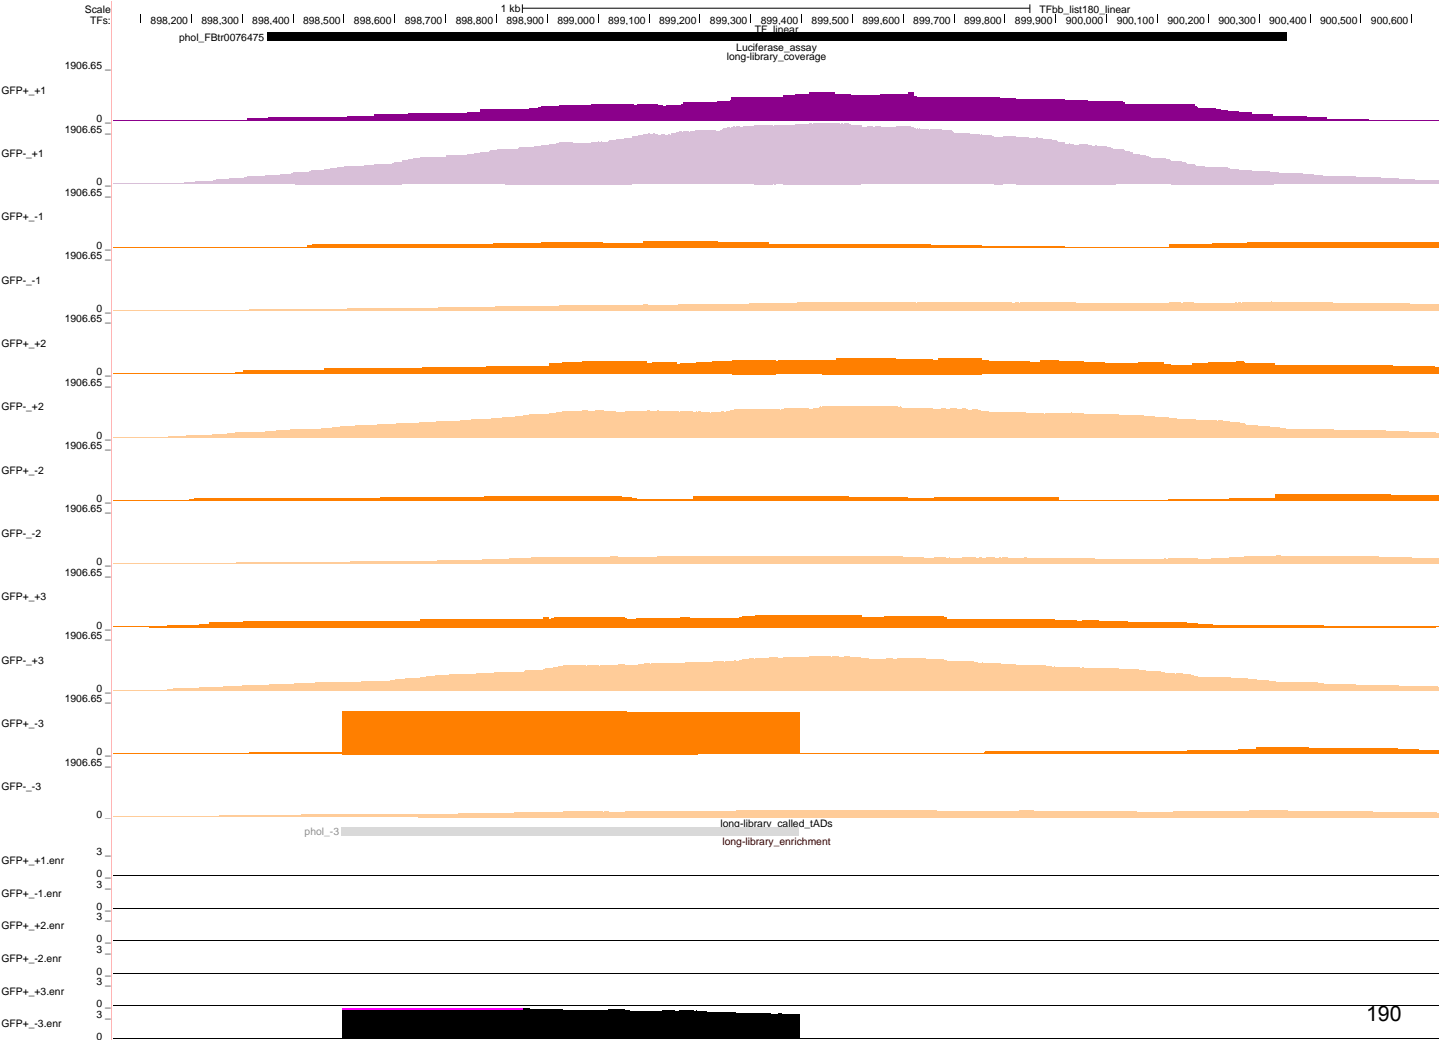

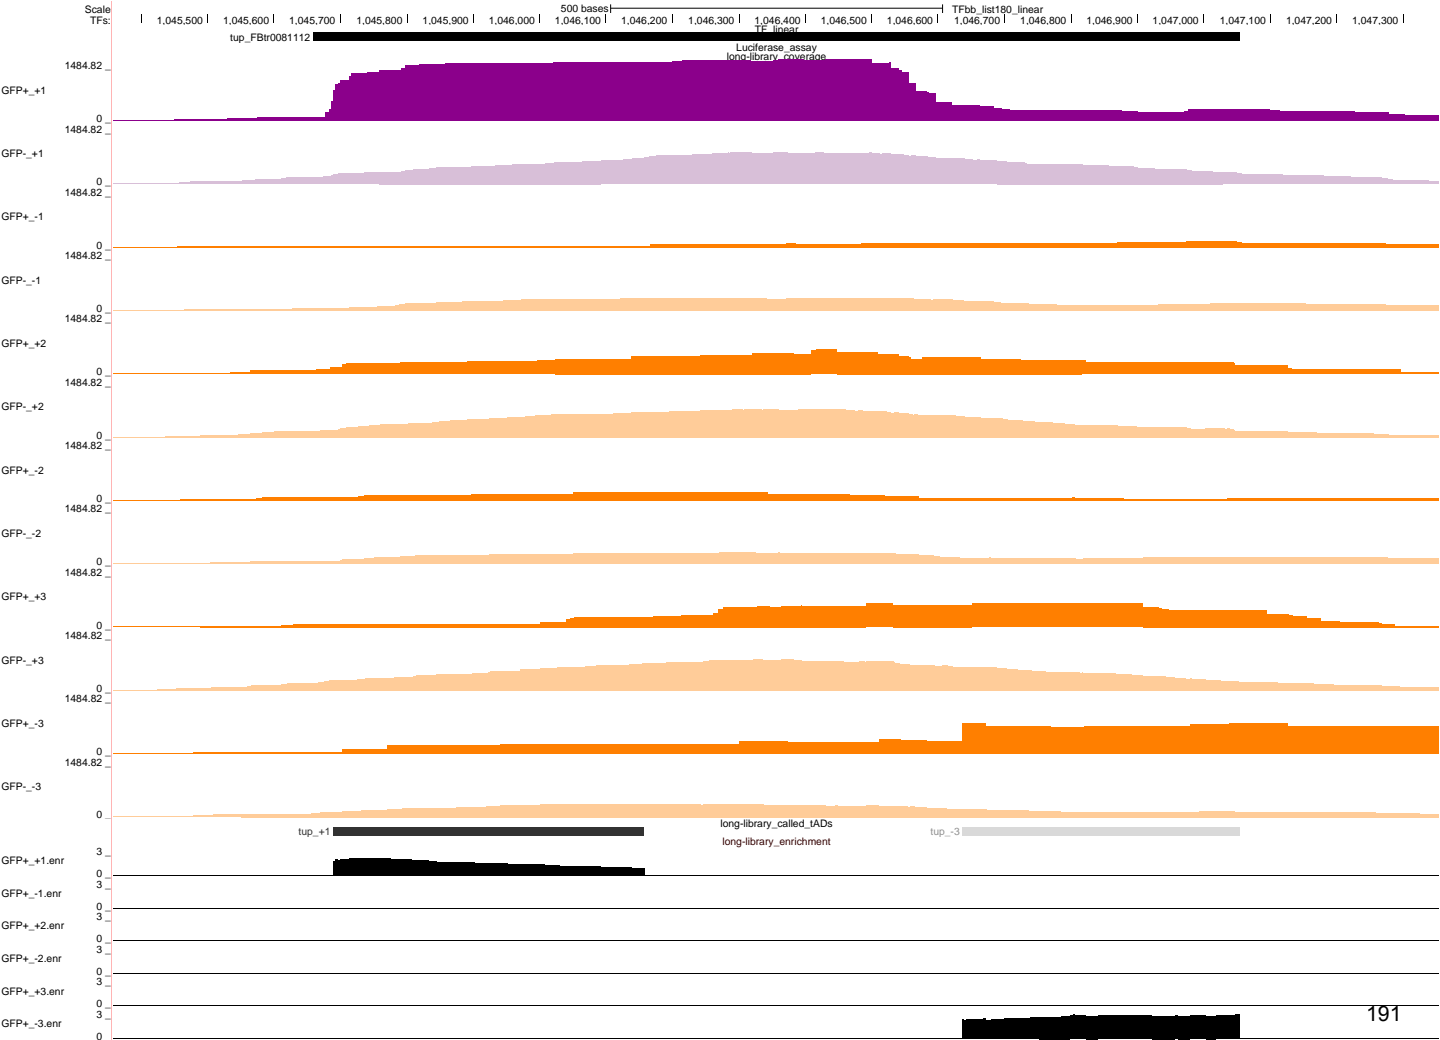

Supplement: EMBJ-37-e98896-s001.pdf [file EMBJ-37-e98896-s001.pdf]
